# Supplementary material for: Palladium(ii)-catalyzed 1,3-heteroaryl acyloxylation of propargylic electrophiles
Source: Royal Society of Chemistry journal article supplement (doi:10.1039/d4qo00869c), 2024-01-01

## Supporting Information

### **Palladium(II)-Catalyzed 1,3-Heteroaryl Acyloxylation of Propargylic Electrophiles**

*Shenghan Teng,<sup>\*‡</sup> Peiyao Liang,<sup>‡</sup> Lin Hu, Siyi Chen, Shoulei Wang,<sup>\*</sup> Wei Huang<sup>\*</sup>*

## Procedures and characterization of compounds

### Table of contents

I. General

II. Optimization of conditions

III. General procedure for 1,3-heteroaryl acyloxylation of propargylic electrophiles

IV. Substrate synthesis

V. Scale-up synthesis and product derivatization

VI. Mechanistic studies

VII. X-ray crystallographic data

VIII. Reference

IX. NMR spectra

## I. General

$^1\text{H}$ ,  $^{13}\text{C}$  and  $^{19}\text{F}$  NMR spectra were acquired on Joel (600 MHz) or Bruker (400 MHz) instruments in indicated deuterated solvents.  $^1\text{H}$  NMR chemical shifts were recorded relative to residual protic solvents ( $\text{CDCl}_3$ :  $\delta$  7.26). Multiplicities were given as: s (singlet), d (doublet), t (triplet), q (quartet) and m (multiplet). The number of protons (n) for a given resonance was indicated by nH. Coupling constants were reported as a  $J$  value in Hz.  $^{13}\text{C}$  NMR chemical shifts were recorded relative to solvent resonance ( $\text{CDCl}_3$ :  $\delta$  77.16,  $\text{CD}_3\text{CN}$ :  $\delta$  118.26  $\pm$  0.02, 1.32  $\pm$  0.02).  $^{19}\text{F}$  NMR chemical shifts were uncorrected.

Unless noted otherwise, commercially available chemicals and solvents were used as received without purification. Flash chromatography was packed with silica gel as the stationary phase. High resolution mass spectra (HRMS) were recorded on a Waters G2-XS QToF spectrometer with ESI mode unless otherwise stated.

## II. Optimization of conditions

*General procedure for solvent screening:* in an argon-filled glovebox,  $\text{Pd}(\text{acac})_2$  (1.2 mg, 0.004 mmol),  $\text{P}(\text{2-furyl})_3$  (1.1 mg, 0.0048 mmol) and 0.1 mL of solvent were charged into an oven-dried 4-mL vial. After stirring for about 15 minutes at rt, *N*-methylindole (19  $\mu\text{L}$ , 0.15 mmol), formic acid (0.8  $\mu\text{L}$ , 0.02 mmol) and propargylic acetate **1a** (20.2 mg, 0.1 mmol) were added sequentially to the reaction mixture. The vial was sealed with a screw cap and placed in a heating block maintained at 30  $^\circ\text{C}$ . After stirring for 24 hours, the reaction mixture was directly evaporated under the reduced pressure. The crude product was then subjected to  $^1\text{H}$  NMR to determine the conversion and yield using 1,3,5-trimethoxybenzene as the internal standard.

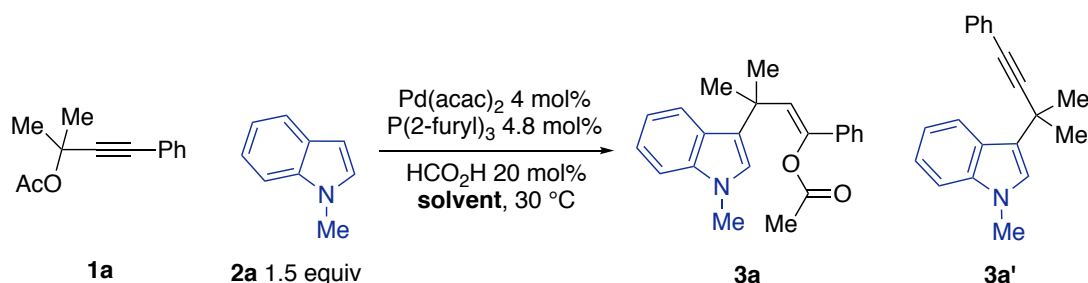

**Table S1.** Solvent screening

| entry | solvent     | conversion of <b>1a</b> | yield of <b>3a</b> (Z/E) | yield of <b>3a'</b> |
|-------|-------------|-------------------------|--------------------------|---------------------|
| 1     | DCM         | 42%                     | 0%                       | 0%                  |
| 2     | toluene     | 41%                     | 0%                       | 0%                  |
| 3     | MTBE        | 39%                     | 0%                       | 0%                  |
| 4     | DME         | 14%                     | 0%                       | 0%                  |
| 5     | 1,4-dioxane | 24%                     | 0%                       | 0%                  |
| 6     | MeCN        | 28%                     | 0%                       | 0%                  |
| 7     | DMF         | 16%                     | 0%                       | 0%                  |

|    |                                                                                   |      |             |    |
|----|-----------------------------------------------------------------------------------|------|-------------|----|
| 8  | 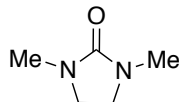  | 20%  | 0%          | 0% |
| 9  | DMSO                                                                              | 58%  | 0%          | 0% |
| 10 |  | 60%  | 0%          | 0% |
| 11 | MeOH                                                                              | 66%  | 0%          | 0% |
| 12 | <i>i</i> -PrOH                                                                    | 28%  | 0%          | 0% |
| 13 | <i>t</i> -BuOH                                                                    | 14%  | 0%          | 0% |
| 14 | CF <sub>3</sub> CH <sub>2</sub> OH                                                | 100% | 77% (>20:1) | 0% |
| 15 | (CF <sub>3</sub> ) <sub>2</sub> CHOH                                              | 100% | 86% (>20:1) | 0% |

*General procedure for the studies of Pd catalysts:* in an argon-filled glovebox, palladium catalyst (0.004 mmol), P(2-furyl)<sub>3</sub> (1.1 mg, 0.0048 mmol) and 0.1 mL of 1,1,1,3,3,3-hexafluoroisopropanol (HFIP) were charged into an oven-dried 4-mL vial. After stirring for about 15 minutes at rt, *N*-methylindole (19 μL, 0.15 mmol), formic acid (0.8 μL, 0.02 mmol) and propargylic acetate **1a** (20.2 mg, 0.1 mmol) were added sequentially to the reaction mixture. The vial was sealed with a screw cap and placed in a heating block maintained at 30 °C. After stirring for 24 hours, the reaction mixture was directly evaporated under the reduced pressure. The crude product was then subjected to <sup>1</sup>H NMR to determine the conversion and yield using CH<sub>2</sub>Br<sub>2</sub> as the internal standard.

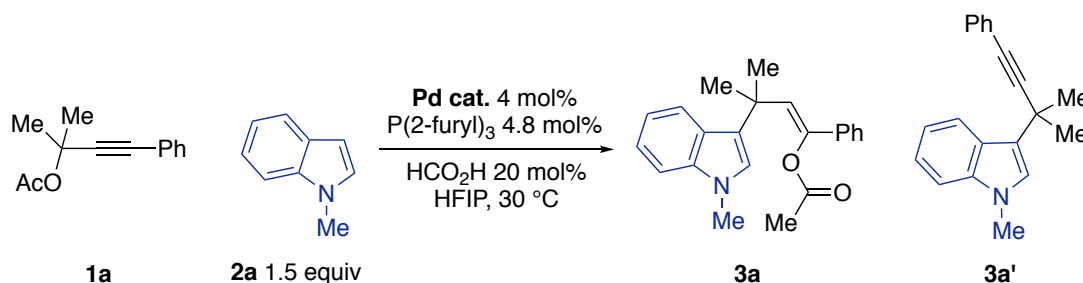

**Table S2.** The effect of palladium source

| entry | Pd catalyst                        | conversion of <b>1a</b> | yield of <b>3a</b> | yield of <b>3a'</b> |
|-------|------------------------------------|-------------------------|--------------------|---------------------|
| 1     | PdCl <sub>2</sub>                  | 100%                    | 0%                 | 27%                 |
| 2     | Pd(OAc) <sub>2</sub>               | 100%                    | 19%                | 3%                  |
| 3     | Pd(TFA) <sub>2</sub>               | 100%                    | 63%                | 0%                  |
| 4     | Pd(acac) <sub>2</sub>              | 100%                    | 86%                | 0%                  |
| 5     | Pd(hfacac) <sub>2</sub>            | 100%                    | 72%                | 0%                  |
| 6     | Pd(cod)Cl <sub>2</sub>             | 100%                    | 79%                | 0%                  |
| 7     | Pd(MeCN)Cl <sub>2</sub>            | 100%                    | 79%                | 0%                  |
| 8     | Pd(PPh <sub>3</sub> ) <sub>4</sub> | 95%                     | 0%                 | 22%                 |
| 9     | Pd(dba) <sub>2</sub>               | 100%                    | 13%                | 20%                 |

*General procedure for the studies of phosphine ligands:* in an argon-filled glovebox, Pd(acac)<sub>2</sub> (1.2 mg, 0.004 mmol), phosphine ligand (0.0048 mmol) and 0.1 mL of HFIP were charged into an oven-dried 4-mL vial. After stirring for about 15 minutes at rt, *N*-methylindole (19  $\mu$ L, 0.15 mmol), formic acid (0.8  $\mu$ L, 0.02 mmol) and propargylic acetate **1a** (20.2 mg, 0.1 mmol) were added sequentially to the reaction mixture. The vial was sealed with a screw cap and placed in a heating block maintained at 30 °C. After stirring for 24 hours, the reaction mixture was directly evaporated under the reduced pressure. The crude product was then subjected to <sup>1</sup>H NMR to determine the conversion and yield using 1,3,5-trimethoxybenzene as the internal standard.

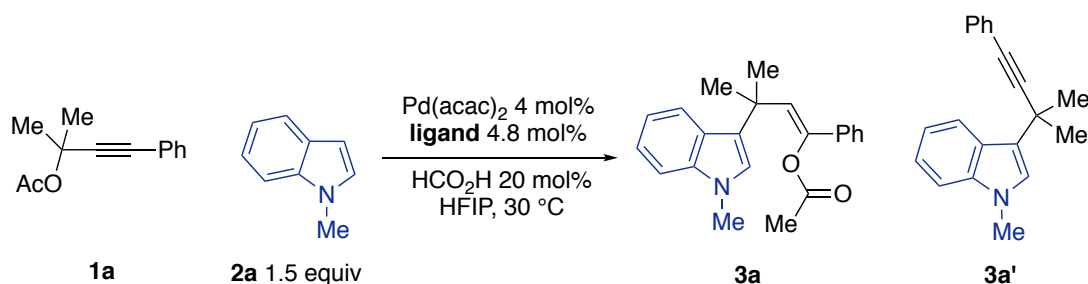

**Table S3.** The effect of phosphine ligands

| entry | ligand                                              | conversion of <b>1a</b> | yield of <b>3a</b> (Z/E) | yield of <b>3a'</b> |
|-------|-----------------------------------------------------|-------------------------|--------------------------|---------------------|
| 1     | P(2-furyl) <sub>3</sub>                             | 100%                    | 86% (>20:1)              | 0%                  |
| 2     | P(2-thiophenyl) <sub>3</sub>                        | 100%                    | 51% (5:1)                | 25%                 |
| 3     | PPh <sub>3</sub>                                    | 100%                    | 0%                       | 19%                 |
| 4     | P(4-MeOC <sub>6</sub> H <sub>4</sub> ) <sub>3</sub> | 100%                    | 32% (1.2:1)              | 18%                 |
| 5     | PCy <sub>3</sub>                                    | 100%                    | 49% (10:1)               | 29%                 |
| 6     | bpy                                                 | 97%                     | 0%                       | 11%                 |
| 7     | phen                                                | 96%                     | 0%                       | 12%                 |

*General procedure for the studies of additives:* in an argon-filled glove box, Pd(acac)<sub>2</sub> (24.5 mg, 0.08 mmol), P(2-furyl)<sub>3</sub> (22.3 mg, 0.096 mmol) and 2 mL of (CF<sub>3</sub>)<sub>2</sub>CHOH were charged into an oven-dried 8-mL vial. After stirring for about 30 minutes at rt, the yellow solution of Pd complex was ready for use.

To another oven-dried 4-mL vial, 0.1 mL of the Pd complex (0.004 mmol, 4 mol%) from the stock solution was added under argon, followed by the sequential addition of *N*-methylindole (19  $\mu$ L, 0.15 mmol), the additive and propargylic acetate (20.2 mg, 0.1 mmol). The vial was sealed with a screw cap and placed in a heating block maintained at 30 °C. After stirring for 24 hours, the reaction mixture was directly evaporated under the reduced pressure. The crude product was then subjected to <sup>1</sup>H NMR to determine the conversion and yield using CH<sub>2</sub>Br<sub>2</sub> as the internal standard.

Result: Formic acid (20 mol%) was needed to afford the desired product in the optimal yield (84%). Furthermore, the prepared Pd complex (4 mol%) provided the same result as the in-situ generated Pd catalyst in this reaction.

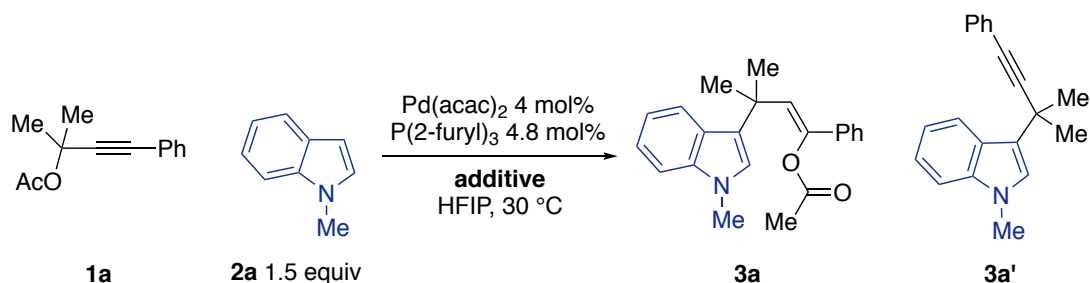

**Table S4.** The influence of additives

| entry | additive                                       | conversion of <b>1a</b> | yield of <b>3a</b> | yield of <b>3a'</b> |
|-------|------------------------------------------------|-------------------------|--------------------|---------------------|
| 1     | $\text{HCO}_2\text{Na}$ (1.2 equiv)            | 100%                    | 51%                | 13%                 |
| 2     | $\text{HCO}_2\text{K}$ (1.2 equiv)             | 100%                    | 66%                | 16%                 |
| 3     | $\text{HCO}_2\text{NH}_4$ (1.2 equiv)          | 100%                    | 47%                | 31%                 |
| 4     | $\text{HCO}_2\text{H}$ (1.2 equiv)             | 100%                    | 86%                | 0%                  |
| 5     | $\text{HCO}_2\text{H}$ (20 mol%)               | 100%                    | 86%                | 0%                  |
| 6     | $\text{PhCO}_2\text{H}$ (20 mol%)              | 100%                    | 65%                | 0%                  |
| 7     | $\text{TsOH}\cdot\text{H}_2\text{O}$ (20 mol%) | 100%                    | 71%                | 8%                  |
| 8     | $\text{AcOH}$ (20 mol%)                        | 100%                    | 49%                | 25%                 |
| 9     | $\text{PivOH}$ (20 mol%)                       | 100%                    | 38%                | 8%                  |
| 10    | none                                           | 100%                    | 54%                | 20%                 |

### III. General procedure for 1,3-heteroaryl acyloxylation of propargylic electrophiles

(A) The procedure for reactions in the scope of heteroarenes: Unless otherwise stated, the procedure was as follows. In an argon-filled glove box,  $\text{Pd}(\text{acac})_2$  (24.5 mg, 0.08 mmol),  $\text{P}(\text{2-furyl})_3$  (22.3 mg, 0.096 mmol) and 2 mL of  $(\text{CF}_3)_2\text{CHOH}$  were charged into an oven-dried 8-mL vial. After stirring for about 30 minutes at rt, the yellow solution of Pd complex was ready for use.

To another oven-dried 4-mL vial, 0.1 mL of the Pd complex (0.004 mmol, 4 mol%) from the stock solution was added under argon, followed by the sequential addition of heteroarene (0.15 mmol), formic acid (0.8  $\mu\text{L}$ , 0.02 mmol) and propargylic acetate **1a** (20.2 mg, 0.1 mmol). The vial was sealed with a screw cap and placed in a heating block maintained at 30 °C. After stirring for 24 hours, the crude reaction mixture was purified by flash chromatography on silica using ethyl acetate/hexanes as eluent.

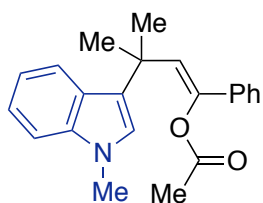

#### **(Z)-3-methyl-3-(1-methyl-1H-indol-3-yl)-1-phenylbut-1-en-1-yl acetate (3a)**

The product was isolated by flash chromatography (ethyl acetate/hexanes 1:20) as yellow oil. 29 mg, 86% yield.

$^1\text{H}$  NMR (400 MHz,  $\text{CDCl}_3$ ):  $\delta$  7.76 (d,  $J = 8.0$  Hz, 1H), 7.35-7.33 (m, 2H), 7.28-7.17 (m, 5H), 7.05 (t,  $J = 7.1$  Hz, 1H), 6.84 (s, 1H), 5.99 (s, 1H), 3.72 (s, 3H), 1.87 (s, 3H), 1.65 (s, 6H).

$^{13}\text{C}$  NMR (100 MHz,  $\text{CDCl}_3$ ):  $\delta$  169.0, 145.1, 137.8, 136.6, 128.5, 128.1, 126.7, 126.5, 124.8, 124.5, 123.7, 121.5, 121.2, 118.8, 109.3, 35.9, 32.7, 29.2, 20.6.

HRMS (ESI): Calcd for  $\text{C}_{22}\text{H}_{23}\text{NO}_2\text{Na}$   $[\text{M}+\text{Na}]^+$ : 356.1626; found: 356.1620.

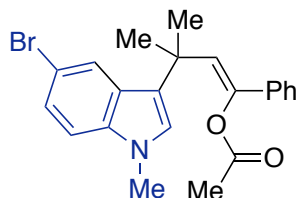

### **(Z)-3-(5-Bromo-1-methyl-1H-indol-3-yl)-3-methyl-1-phenylbut-1-en-1-yl acetate (3b)**

The product was isolated by flash chromatography (ethyl acetate/hexanes 1:10) as yellow oil. 29 mg, 71% yield.

$^1\text{H}$  NMR (400 MHz,  $\text{CDCl}_3$ ):  $\delta$  7.91 (d,  $J = 1.9$  Hz, 1H), 7.38 (d,  $J = 6.8$  Hz, 2H), 7.33-7.24 (m, 4H), 7.16 (d,  $J = 8.7$  Hz, 2H), 5.95 (s, 1H), 3.73 (s, 3H), 1.88 (s, 3H), 1.65 (s, 6H).

$^{13}\text{C}$  NMR (100 MHz,  $\text{CDCl}_3$ ):  $\delta$  168.9, 145.4, 136.4, 128.6, 128.3, 128.2, 125.93, 125.88, 124.9, 124.4, 123.6, 123.2, 112.3, 110.8, 35.8, 32.8, 29.4, 20.5.

HRMS (ESI): Calcd for  $\text{C}_{22}\text{H}_{22}^{79}\text{BrNO}_2\text{Na}$   $[\text{M}+\text{Na}]^+$ : 434.0726; found: 434.0729.

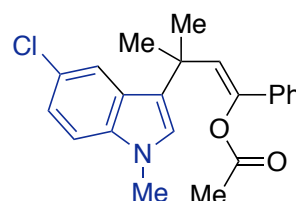

### **(Z)-3-(5-Chloro-1-methyl-1H-indol-3-yl)-3-methyl-1-phenylbut-1-en-1-yl acetate (3c)**

The product was isolated by flash chromatography (ethyl acetate/hexanes 1:10) as yellow oil. 30 mg, 81% yield.

$^1\text{H}$  NMR (400 MHz,  $\text{CDCl}_3$ ):  $\delta$  7.71 (d,  $J = 1.9$  Hz, 1H), 7.34 (d,  $J = 6.8$  Hz, 2H), 7.29-7.22 (m, 3H), 7.18-7.12 (m, 2H), 6.86 (s, 1H), 5.92 (s, 1H), 3.70 (s, 3H), 1.84 (s, 3H), 1.62 (s, 6H).

$^{13}\text{C}$  NMR (100 MHz,  $\text{CDCl}_3$ ):  $\delta$  168.9, 145.4, 136.4, 136.2, 128.6, 128.2, 127.6, 126.0, 125.9, 124.9, 124.6, 123.2, 121.8, 120.6, 110.3, 35.8, 32.9, 29.4, 20.5.

HRMS (ESI): Calcd for  $\text{C}_{22}\text{H}_{22}\text{ClNO}_2\text{Na}$   $[\text{M}+\text{Na}]^+$ : 390.1237; found: 390.1242.

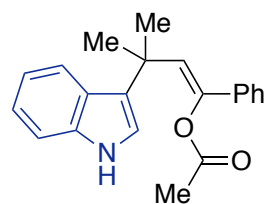

### **(Z)-3-(1H-Indol-3-yl)-3-methyl-1-phenylbut-1-en-1-yl acetate (3d)**

The product was isolated by flash chromatography (ethyl acetate/hexanes 1:8) as yellow oil. 30 mg, 95% yield.

$^1\text{H}$  NMR (400 MHz,  $\text{CDCl}_3$ ):  $\delta$  7.94 (s, 1H), 7.80 (d,  $J = 8.0$  Hz, 1H), 7.39-7.34 (m, 3H), 7.32-7.25 (m, 3H), 7.19 (t,  $J = 7.2$  Hz, 1H), 7.10 (t,  $J = 7.2$  Hz, 1H), 7.00 (d,  $J = 2.4$  Hz, 1H), 6.04 (s, 1H), 1.89 (s, 3H), 1.69 (s, 6H).

$^{13}\text{C}$  NMR (100 MHz,  $\text{CDCl}_3$ ):  $\delta$  169.1, 145.3, 137.1, 136.5, 128.6, 128.1, 126.32, 126.29, 125.2, 124.8, 121.9, 121.2, 119.6, 119.3, 111.3, 35.8, 29.2, 20.6.

HRMS (ESI): Calcd for  $\text{C}_{21}\text{H}_{21}\text{NO}_2\text{Na}$   $[\text{M}+\text{Na}]^+$ : 342.1470; found: 342.1479.

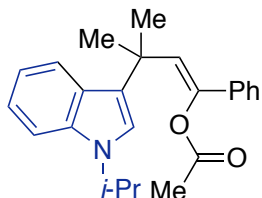

### (Z)-3-(1-Isopropyl-1H-indol-3-yl)-3-methyl-1-phenylbut-1-en-1-yl acetate (3e)

The product was isolated by flash chromatography (ethyl acetate/hexanes 1:20) as yellow oil. 31 mg, 86% yield.

$^1\text{H}$  NMR (600 MHz,  $\text{CDCl}_3$ ):  $\delta$  7.80 (d,  $J = 8.0$  Hz, 1H), 7.40-7.37 (m, 3H), 7.32-7.29 (m, 2H), 7.27-7.25 (m, 1H), 7.21 (t,  $J = 7.6$  Hz, 1H), 7.09 (t,  $J = 7.5$  Hz, 1H), 7.05 (s, 1H), 6.06 (s, 1H), 4.68 (hept,  $J = 6.7$  Hz, 1H), 1.91 (s, 3H), 1.70 (s, 6H), 1.54 (d,  $J = 6.7$  Hz, 6H).

$^{13}\text{C}$  NMR (150 MHz,  $\text{CDCl}_3$ ):  $\delta$  169.0, 145.1, 136.62, 136.60, 128.5, 128.0, 126.8, 126.6, 124.8, 123.7, 121.3, 121.1, 119.0, 118.7, 109.5, 46.9, 36.0, 29.3, 22.9, 20.7.

HRMS (ESI): Calcd for  $\text{C}_{24}\text{H}_{27}\text{NO}_2\text{Na}$   $[\text{M}+\text{Na}]^+$ : 384.1934; found: 384.1935.

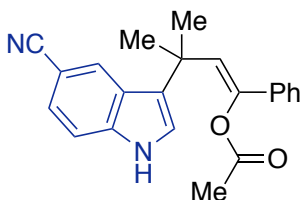

### (Z)-3-(5-Cyano-1H-indol-3-yl)-3-methyl-1-phenylbut-1-en-1-yl acetate (3f)

The product was isolated by flash chromatography (ethyl acetate/hexanes 1:5) as yellow oil. 23 mg, 68% yield.

$^1\text{H}$  NMR (400 MHz,  $\text{CDCl}_3$ ):  $\delta$  8.38 (s, 1H), 8.12 (s, 1H), 7.38-7.27 (m, 7H), 7.12 (d,  $J = 2.4$  Hz, 1H), 5.96 (s, 1H), 1.81 (s, 3H), 1.65 (s, 6H).

$^{13}\text{C}$  NMR (100 MHz,  $\text{CDCl}_3$ ):  $\delta$  168.8, 145.9, 138.8, 136.0, 128.7, 128.5, 126.8, 126.2, 126.0, 125.3, 124.90, 124.86, 121.8, 121.1, 112.2, 102.4, 35.6, 29.5, 20.5.

HRMS (ESI): Calcd for  $\text{C}_{22}\text{H}_{20}\text{N}_2\text{O}_2\text{Na}$   $[\text{M}+\text{Na}]^+$ : 367.1417; found: 367.1418.

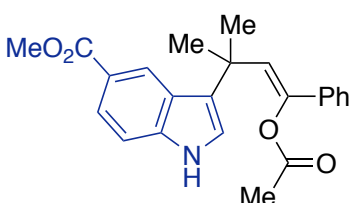

### Methyl (Z)-3-(4-acetoxy-2-methyl-4-phenylbut-3-en-2-yl)-1H-indole-5-carboxylate (3g)



The product was isolated by flash chromatography (ethyl acetate/hexanes 1:5) as yellow oil. 34 mg, 89% yield.  
 $^1\text{H}$  NMR (400 MHz,  $\text{CDCl}_3$ ):  $\delta$  8.56 (s, 1H), 8.29 (s, 1H), 7.81 (d,  $J = 8.6$  Hz, 1H), 7.30 (d,  $J = 6.8$  Hz, 2H), 7.26-7.17 (m, 4H), 6.98 (d,  $J = 2.5$  Hz, 1H), 6.00 (s, 1H), 3.89 (s, 3H), 1.82 (s, 3H), 1.68 (s, 6H).

$^{13}\text{C}$  NMR (100 MHz,  $\text{CDCl}_3$ ):  $\delta$  168.9, 168.4, 145.7, 139.8, 136.4, 128.6, 128.2, 126.2, 126.0, 125.9, 125.0, 124.1, 123.3, 121.4, 121.1, 111.0, 51.9, 35.8, 29.6, 20.5.

HRMS (ESI): Calcd for  $\text{C}_{23}\text{H}_{23}\text{NO}_4\text{Na}$   $[\text{M}+\text{Na}]^+$ : 400.1519; found: 400.1519.

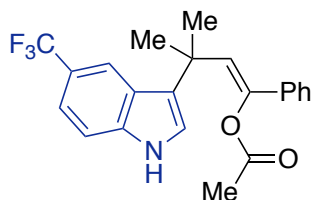

### (Z)-3-Methyl-1-phenyl-3-[5-(trifluoromethyl)-1H-indol-3-yl]but-1-en-1-yl acetate (3h)

The product was isolated by flash chromatography (ethyl acetate/hexanes 1:10) as yellow oil. 29 mg, 75% yield.  
 $^1\text{H}$  NMR (600 MHz,  $\text{CDCl}_3$ ):  $\delta$  8.20 (s, 1H), 8.12 (s, 1H), 7.42-7.36 (m, 4H), 7.31-7.25 (m, 3H), 7.09 (d,  $J = 2.2$  Hz, 1H), 5.95 (s, 1H), 1.86 (s, 3H), 1.68 (s, 6H).

$^{13}\text{C}$  NMR (150 MHz,  $\text{CDCl}_3$ ):  $\delta$  169.0, 145.7, 138.5 (q,  $J_{\text{CF}} = 1.2$  Hz), 136.5, 128.6, 128.3, 125.9, 125.8, 125.7, 125.6 (q,  $J_{\text{CF}} = 271.7$  Hz), 125.0, 121.7 (q,  $J_{\text{CF}} = 31.5$  Hz), 121.4, 118.8 (q,  $J_{\text{CF}} = 4.5$  Hz), 118.7 (q,  $J_{\text{CF}} = 3.5$  Hz), 111.5, 35.8, 29.4, 20.5.

$^{19}\text{F}$  NMR (564.9 MHz,  $\text{CDCl}_3$ ):  $\delta$  -60.0.

HRMS (ESI): Calcd for  $\text{C}_{22}\text{H}_{20}\text{F}_3\text{NO}_2\text{Na}$   $[\text{M}+\text{Na}]^+$ : 410.1338; found: 410.1342.

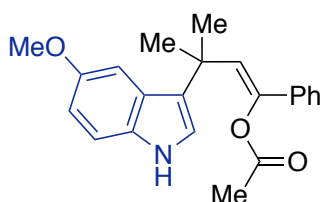

### (Z)-3-(5-Methoxy-1H-indol-3-yl)-3-methyl-1-phenylbut-1-en-1-yl acetate (3i)

The product was isolated by flash chromatography (ethyl acetate/hexanes 1:10) as brown oil. 25 mg, 72% yield.  
 $^1\text{H}$  NMR (400 MHz,  $\text{CDCl}_3$ ):  $\delta$  7.84 (s, 1H), 7.38-7.36 (m, 2H), 7.31-7.20 (m, 5H), 6.96 (d,  $J = 2.4$  Hz, 1H), 6.84 (dd,  $J = 8.8, 2.4$  Hz, 1H), 5.94 (s, 1H), 3.81 (s, 3H), 1.93 (s, 3H), 1.66 (s, 6H).

$^{13}\text{C}$  NMR (100 MHz,  $\text{CDCl}_3$ ):  $\delta$  169.2, 153.6, 145.1, 136.7, 132.2, 128.6, 128.1, 126.7, 126.2, 124.91, 124.86, 120.2, 112.1, 111.9, 103.0, 56.0, 35.9, 28.9, 20.7.

HRMS (ESI): Calcd for  $\text{C}_{22}\text{H}_{23}\text{NO}_3\text{Na}$   $[\text{M}+\text{Na}]^+$ : 372.1570; found: 372.1572.

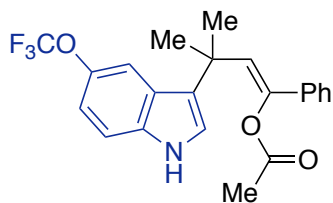

**(Z)-3-Methyl-1-phenyl-3-[5-(trifluoromethoxy)-1H-indol-3-yl]but-1-en-1-yl acetate (3j)**

The product was isolated by flash chromatography (ethyl acetate/hexanes 1:10) as yellow oil. 29 mg, 72% yield.

<sup>1</sup>H NMR (600 MHz, CDCl<sub>3</sub>): δ 8.07 (s, 1H), 7.67 (s, 1H), 7.37-7.36 (m, 2H), 7.31-7.29 (m, 3H), 7.27-7.25 (m, 1H), 7.07 (d, *J* = 2.4 Hz, 1H), 7.06 (d, *J* = 8.8 Hz, 1H), 5.93 (s, 1H), 1.86 (s, 3H), 1.66 (s, 6H).

<sup>13</sup>C NMR (150 MHz, CDCl<sub>3</sub>): δ 169.0, 145.6, 142.6 (q, *J*<sub>CF</sub> = 2.1 Hz), 136.5, 135.4, 128.6, 128.3, 126.5, 125.7, 125.5, 124.9, 121.6, 121.0 (q, *J*<sub>CF</sub> = 255.2 Hz), 115.9, 113.7, 111.8, 35.7, 29.2, 20.5.

<sup>19</sup>F NMR (564.9 MHz, CDCl<sub>3</sub>): δ -58.0.

HRMS (ESI): Calcd for C<sub>22</sub>H<sub>20</sub>F<sub>3</sub>NO<sub>3</sub>Na [M+Na]<sup>+</sup>: 426.1287; found: 426.1291.

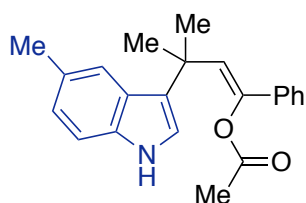

**(Z)-3-Methyl-3-(5-methyl-1H-indol-3-yl)-1-phenylbut-1-en-1-yl acetate (3k)**

The product was isolated by flash chromatography (ethyl acetate/hexanes 1:10) as yellow oil. 27 mg, 81% yield in CF<sub>3</sub>CH<sub>2</sub>OH. When HFIP was used as solvent, **3k** was obtained in 61% yield.

<sup>1</sup>H NMR (600 MHz, CDCl<sub>3</sub>): δ 7.85 (s, 1H), 7.58 (s, 1H), 7.39 (d, *J* = 7.6 Hz, 2H), 7.31 (t, *J* = 7.5 Hz, 2H), 7.27-7.23 (m, 2H), 7.02 (d, *J* = 8.2 Hz, 1H), 6.96 (d, *J* = 2.3 Hz, 1H), 6.04 (s, 1H), 2.45 (s, 3H), 1.91 (s, 3H), 1.69 (s, 6H).

<sup>13</sup>C NMR (150 MHz, CDCl<sub>3</sub>): δ 169.2, 145.2, 136.6, 135.5, 128.5, 128.3, 128.1, 126.5, 126.4, 124.9, 124.6, 123.5, 120.8, 119.8, 110.9, 35.9, 29.2, 21.8, 20.6.

HRMS (ESI): Calcd for C<sub>22</sub>H<sub>23</sub>NO<sub>2</sub>Na [M+Na]<sup>+</sup>: 356.1621; found: 356.1622.

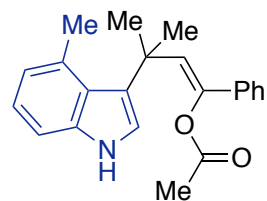

**(Z)-3-Methyl-3-(4-methyl-1H-indol-3-yl)-1-phenylbut-1-en-1-yl acetate (3l)**

The product was isolated by flash chromatography (ethyl acetate/hexanes 1:10) as yellow oil. 27 mg, 81% yield in CF<sub>3</sub>CH<sub>2</sub>OH.

$^1\text{H}$  NMR (600 MHz,  $\text{CDCl}_3$ ):  $\delta$  7.98 (s, 1H), 7.36 (d,  $J = 7.3$  Hz, 2H), 7.31 (t,  $J = 7.6$  Hz, 2H), 7.27-7.24 (m, 1H), 7.18 (d,  $J = 8.0$  Hz, 1H), 7.10-7.07 (m, 2H), 6.90 (d,  $J = 7.2$  Hz, 1H), 6.12 (s, 1H), 2.76 (s, 3H), 1.69 (s, 6H), 1.55 (s, 3H).

$^{13}\text{C}$  NMR (150 MHz,  $\text{CDCl}_3$ ):  $\delta$  168.9, 144.9, 138.2, 136.4, 131.1, 128.6, 128.2, 128.0, 125.9, 125.2, 124.6, 122.2, 122.0, 120.4, 108.9, 35.7, 31.6, 23.1, 19.9.

HRMS (ESI): Calcd for  $\text{C}_{22}\text{H}_{23}\text{NO}_2\text{Na}$   $[\text{M}+\text{Na}]^+$ : 356.1621; found: 356.1622.

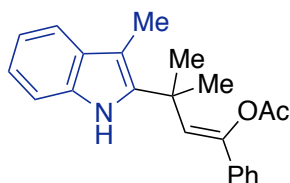

### **(Z)-3-Methyl-3-(3-methyl-1H-indol-2-yl)-1-phenylbut-1-en-1-yl acetate (3m)**

The product was isolated by flash chromatography (ethyl acetate/hexanes 1:20) as yellow oil. 24 mg, 73% yield in  $\text{CF}_3\text{CH}_2\text{OH}$ .

$^1\text{H}$  NMR (600 MHz,  $\text{CDCl}_3$ ):  $\delta$  8.10 (br s, NH), 7.51 (d,  $J = 7.8$  Hz, 1H), 7.40-7.38 (m, 2H), 7.35-7.32 (m, 2H), 7.30-7.28 (m, 2H), 7.14-7.08 (m, 2H), 5.94 (s, 1H), 2.36 (s, 3H), 1.68 (s, 6H), 1.60 (s, 3H).

$^{13}\text{C}$  NMR (150 MHz,  $\text{CDCl}_3$ ):  $\delta$  168.9, 146.4, 139.3, 136.0, 134.3, 130.4, 128.7, 128.4, 125.0, 124.8, 121.2, 119.1, 118.1, 110.4, 106.3, 36.9, 28.9, 20.1, 10.1.

HRMS (ESI): Calcd for  $\text{C}_{22}\text{H}_{23}\text{NO}_2\text{Na}$   $[\text{M}+\text{Na}]^+$ : 356.1621; found: 356.1623.

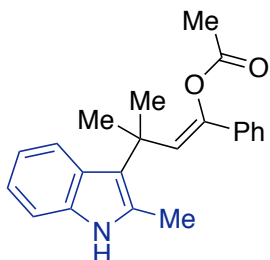

### **(Z)-3-Methyl-3-(2-methyl-1H-indol-3-yl)-1-phenylbut-1-en-1-yl acetate (3n)**

The product was isolated by flash chromatography (ethyl acetate/hexanes 1:10) as yellow oil. 26 mg, 79% yield in  $\text{CF}_3\text{CH}_2\text{OH}$ .

$^1\text{H}$  NMR (600 MHz,  $\text{CDCl}_3$ ):  $\delta$  7.88 (d,  $J = 8.0$  Hz, 1H), 7.76 (s, 1H), 7.38-7.36 (m, 2H), 7.31 (t,  $J = 7.5$  Hz, 2H), 7.27-7.24 (m, 1H), 7.22 (d,  $J = 8.0$  Hz, 1H), 7.09-7.02 (m, 2H), 6.13 (s, 1H), 2.46 (s, 3H), 1.78 (s, 6H), 1.45 (s, 3H).

$^{13}\text{C}$  NMR (150 MHz,  $\text{CDCl}_3$ ):  $\delta$  168.7, 145.6, 136.4, 135.1, 131.1, 128.6, 128.5, 128.1, 128.0, 124.6, 120.8, 120.4, 119.1, 117.9, 110.3, 37.0, 30.5, 19.9, 15.0.

HRMS (ESI): Calcd for  $\text{C}_{22}\text{H}_{23}\text{NO}_2\text{Na}$   $[\text{M}+\text{Na}]^+$ : 356.1621; found: 356.1623.

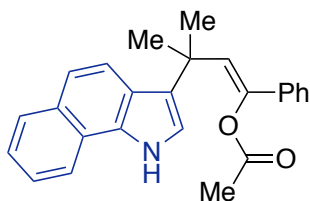

**(Z)-3-(1H-Benzo[g]indol-3-yl)-3-methyl-1-phenylbut-1-en-1-yl acetate (3o)**

The product was isolated by flash chromatography (ethyl acetate/hexanes 1:20) as yellow oil. 21 mg, 57% yield in CF<sub>3</sub>CH<sub>2</sub>OH.

<sup>1</sup>H NMR (400 MHz, CDCl<sub>3</sub>): δ 8.64 (s, 1H), 7.96 (d, *J* = 8.0 Hz, 1H), 7.88 (t, *J* = 9.2 Hz, 2H), 7.51-7.45 (m, 2H), 7.42-7.35 (m, 3H), 7.30-7.23 (m, 3H), 7.04 (d, *J* = 2.5 Hz, 1H), 6.07 (s, 1H), 1.80 (s, 3H), 1.70 (s, 6H).

<sup>13</sup>C NMR (100 MHz, CDCl<sub>3</sub>): δ 169.1, 145.4, 136.5, 131.7, 130.3, 128.9, 128.6, 128.2, 127.1, 126.3, 125.4, 124.8, 124.1, 122.4, 121.9, 121.0, 120.1, 119.4, 117.7, 35.9, 29.6, 20.5.

HRMS (ESI): Calcd for C<sub>25</sub>H<sub>23</sub>NO<sub>2</sub>Na [M+Na]<sup>+</sup>: 392.1621; found: 392.1624.

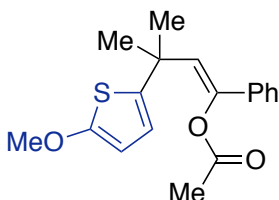

**(Z)-3-(5-Methoxythiophen-2-yl)-3-methyl-1-phenylbut-1-en-1-yl acetate (3p)**

The product was isolated by flash chromatography (ethyl acetate/hexanes 1:25) as yellow oil. 16 mg, 51% yield in CF<sub>3</sub>CH<sub>2</sub>OH.

<sup>1</sup>H NMR (400 MHz, CDCl<sub>3</sub>): δ 7.38-7.36 (m, 2H), 7.33-7.27 (m, 3H), 6.48 (d, *J* = 3.9 Hz, 1H), 5.99 (d, *J* = 3.9 Hz, 1H), 5.82 (s, 1H), 3.85 (s, 3H), 2.08 (s, 3H), 1.56 (s, 6H).

<sup>13</sup>C NMR (100 MHz, CDCl<sub>3</sub>): δ 168.9, 164.6, 146.0, 140.7, 136.3, 128.6, 128.3, 125.8, 124.9, 119.4, 102.8, 60.4, 38.4, 30.9, 20.9.

HRMS (ESI): Calcd for C<sub>18</sub>H<sub>20</sub>O<sub>3</sub>SNa [M+Na]<sup>+</sup>: 339.1025; found: 339.1029.

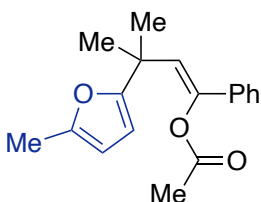

**(Z)-3-(5-Methylfuran-2-yl)-3-methyl-1-phenylbut-1-en-1-yl acetate (3q)**

The product was isolated by flash chromatography (ethyl acetate/hexanes 1:50) as yellow oil. 20 mg, 71% yield in HFIP.

<sup>1</sup>H NMR (400 MHz, CDCl<sub>3</sub>): δ 7.36 (d, *J* = 8.7 Hz, 2H), 7.30-7.28 (m, 2H), 7.24 (t, *J* = 7.2 Hz, 1H), 5.93 (d, *J* = 3.0 Hz, 1H), 5.84 (d, *J* = 3.0 Hz, 1H), 5.80 (s, 1H), 2.26 (s, 3H), 1.99 (s, 3H), 1.49 (s, 6H).

<sup>13</sup>C NMR (100 MHz, CDCl<sub>3</sub>): δ 168.8, 159.4, 150.8, 145.7, 136.2, 128.6, 128.2, 124.8, 124.5, 105.7, 103.9, 36.6,

28.2, 20.8, 13.7.

HRMS (ESI): Calcd for C<sub>18</sub>H<sub>20</sub>O<sub>3</sub>Na [M+Na]<sup>+</sup>: 307.1305; found: 307.1302.

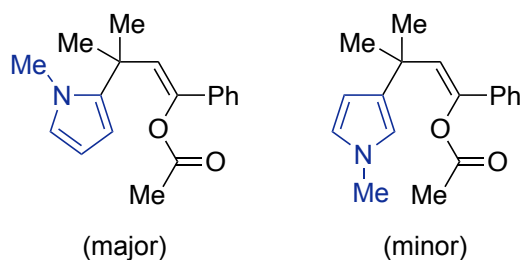

The product was isolated by flash chromatography (ethyl acetate/hexanes 1:30) as yellow oil. 18 mg, 64% yield in CF<sub>3</sub>CH<sub>2</sub>OH. The ratio of C2- and C3-isomers was determined to be 2:1 by crude <sup>1</sup>H NMR. The two isomers were separated by silica gel.

**(Z)-3-Methyl-3-(1-methyl-1H-pyrrol-2-yl)-1-phenylbut-1-en-1-yl acetate (major, 3r)**

<sup>1</sup>H NMR (600 MHz, CDCl<sub>3</sub>): δ 7.36 (d, *J* = 7.1 Hz, 2H), 7.33-7.30 (m, 2H), 7.27 (t, *J* = 6.8 Hz, 1H), 6.52 (t, *J* = 2.2 Hz, 1H), 6.01 (t, *J* = 3.2 Hz, 1H), 5.99 (dd, *J* = 3.6, 2.0 Hz, 1H), 5.92 (s, 1H), 3.62 (s, 3H), 1.83 (s, 3H), 1.55 (s, 6H).

<sup>13</sup>C NMR (150 MHz, CDCl<sub>3</sub>): δ 168.9, 146.1, 139.0, 135.9, 128.7, 128.3, 124.9, 124.6, 123.3, 106.2, 104.8, 35.9, 35.4, 29.7, 20.5.

**(Z)-3-Methyl-3-(1-methyl-1H-pyrrol-3-yl)-1-phenylbut-1-en-1-yl acetate (minor, 3r')**

<sup>1</sup>H NMR (600 MHz, CDCl<sub>3</sub>): δ 7.37 (d, *J* = 8.2 Hz, 2H), 7.31-7.28 (m, 2H), 7.24 (t, *J* = 7.2 Hz, 1H), 6.52 (t, *J* = 2.5 Hz, 1H), 6.46 (t, *J* = 2.1 Hz, 1H), 6.10 (t, *J* = 2.3 Hz, 1H), 5.86 (s, 1H), 3.61 (s, 3H), 2.06 (s, 3H), 1.49 (s, 6H).

<sup>13</sup>C NMR (150 MHz, CDCl<sub>3</sub>): δ 169.2, 144.5, 136.7, 133.4, 128.5, 128.0, 127.4, 124.7, 121.5, 118.0, 106.8, 36.2, 35.5, 30.3, 20.8.

HRMS (ESI): Calcd for C<sub>18</sub>H<sub>21</sub>NO<sub>2</sub>Na [M+Na]<sup>+</sup>: 306.1464; found: 306.1466.

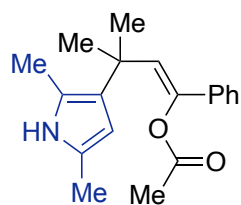

**(Z)-3-(2,5-Dimethylpyrrol-3-yl)-3-methyl-1-phenylbut-1-en-1-yl acetate (3s)**

The product was isolated by flash chromatography (ethyl acetate/hexanes 1:20) as yellow oil. 21 mg, 71% yield in CF<sub>3</sub>CH<sub>2</sub>OH.

<sup>1</sup>H NMR (600 MHz, CDCl<sub>3</sub>): δ 7.40 (s, NH), 7.35 (d, *J* = 8.7 Hz, 2H), 7.30-7.27 (m, 2H), 7.22 (t, *J* = 7.3 Hz, 1H), 5.91 (s, 1H), 5.78 (s, 1H), 2.20 (s, 3H), 2.18 (s, 3H), 1.94 (s, 3H), 1.47 (s, 6H).

<sup>13</sup>C NMR (150 MHz, CDCl<sub>3</sub>): δ 168.8, 144.9, 136.6, 128.6, 127.9, 127.6, 126.8, 124.5, 123.3, 122.0, 105.0, 34.9,

29.9, 20.6, 13.2, 13.0.

HRMS (ESI): Calcd for C<sub>19</sub>H<sub>23</sub>NO<sub>2</sub>Na [M+Na]<sup>+</sup>: 320.1621; found: 320.1621.

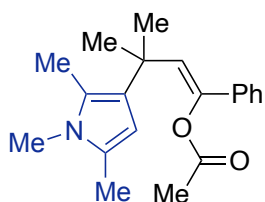

**(Z)-3-Methyl-1-phenyl-3-(1,2,5-trimethylpyrrol-3-yl)but-1-en-1-yl acetate (3t)**

The product was isolated by flash chromatography (ethyl acetate/hexanes 1:20) as yellow oil. 19 mg, 61% yield in CF<sub>3</sub>CH<sub>2</sub>OH.

<sup>1</sup>H NMR (600 MHz, CDCl<sub>3</sub>): δ 7.36 (d, *J* = 8.6 Hz, 2H), 7.30-7.28 (m, 2H), 7.23 (t, *J* = 7.3 Hz, 1H), 5.92 (s, 1H), 5.81 (s, 1H), 3.32 (s, 3H), 2.20 (s, 3H), 2.17 (s, 3H), 1.94 (s, 3H), 1.48 (s, 6H).

<sup>13</sup>C NMR (150 MHz, CDCl<sub>3</sub>): δ 168.8, 144.7, 136.7, 128.5, 127.9, 127.8, 126.2, 125.1, 124.5, 124.0, 103.6, 35.0, 29.9, 20.6, 12.5, 12.0.

HRMS (ESI): Calcd for C<sub>20</sub>H<sub>25</sub>NO<sub>2</sub>Na [M+Na]<sup>+</sup>: 334.1777; found: 334.1778.

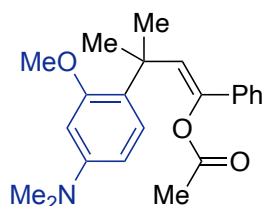

**(Z)-3-[4-(Dimethylamino)-2-methoxyphenyl]-3-methyl-1-phenylbut-1-en-1-yl acetate (3u)**

The product was isolated by flash chromatography (ethyl acetate/hexanes 1:10) as yellow oil. 25 mg, 71% yield in CF<sub>3</sub>CH<sub>2</sub>OH.

<sup>1</sup>H NMR (600 MHz, CDCl<sub>3</sub>): δ 7.34 (d, *J* = 8.6 Hz, 2H), 7.30-7.27 (m, 2H), 7.22 (t, *J* = 7.3 Hz, 1H), 7.19 (d, *J* = 8.3 Hz, 1H), 6.31-6.29 (m, 2H), 6.01 (s, 1H), 3.80 (s, 3H), 2.93 (s, 6H), 1.72 (s, 3H), 1.53 (s, 6H).

<sup>13</sup>C NMR (150 MHz, CDCl<sub>3</sub>): δ 168.7, 158.8, 150.8, 143.7, 136.9, 128.4, 127.5, 126.3, 125.4, 124.4, 104.5, 98.2, 55.5, 41.1, 37.2, 29.0, 20.4.

HRMS (ESI): Calcd for C<sub>22</sub>H<sub>27</sub>NO<sub>3</sub>Na [M+Na]<sup>+</sup>: 376.1883; found: 376.1885.

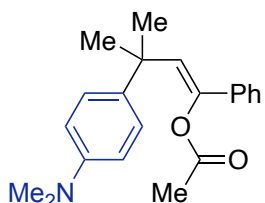

**(Z)-3-[4-(Dimethylamino)phenyl]-3-methyl-1-phenylbut-1-en-1-yl acetate (3v)**

The product was isolated by flash chromatography (ethyl acetate/hexanes 1:20) as yellow oil. 21 mg, 65% yield in HFIP.

$^1\text{H}$  NMR (600 MHz,  $\text{CDCl}_3$ ):  $\delta$  7.36 (d,  $J$  = 8.6 Hz, 2H), 7.31-7.27 (m, 4H), 7.25-7.23 (m, 1H), 6.72 (d,  $J$  = 9.0 Hz, 2H), 5.88 (s, 1H), 2.92 (s, 6H), 1.89 (s, 3H), 1.52 (s, 6H).

$^{13}\text{C}$  NMR (150 MHz,  $\text{CDCl}_3$ ):  $\delta$  169.0, 149.0, 145.3, 137.3, 136.6, 128.5, 128.0, 127.4, 126.8, 124.7, 112.8, 41.0, 39.2, 30.1, 20.7.

HRMS (ESI): Calcd for  $\text{C}_{21}\text{H}_{26}\text{NO}_2$   $[\text{M}+\text{H}]^+$ : 324.1958; found: 324.1955.

(B) The procedure for reactions in the scope of substituted propargylic acetates: Unless otherwise stated, the procedure was as follows. In an argon-filled glove box,  $\text{Pd}(\text{acac})_2$  (24.5 mg, 0.08 mmol),  $\text{P}(2\text{-furyl})_3$  (22.3 mg, 0.096 mmol) and 2 mL of trifluoroethanol were charged into an oven-dried 8-mL vial. After stirring for about 30 minutes at rt, the yellow solution of Pd complex was ready for use.

To another oven-dried 4-mL vial, 0.1 mL of the Pd complex (0.004 mmol, 4 mol%) from the stock solution was added under argon, followed by the sequential addition of 1*H*-indole (17.6 mg, 0.15 mmol), formic acid (0.8  $\mu\text{L}$ , 0.02 mmol) and substituted propargylic acetate (0.1 mmol). The vial was sealed with a screw cap and placed in a heating block maintained at 30  $^\circ\text{C}$ . After stirring for 24 hours, the crude reaction mixture was purified by flash chromatography on silica using ethyl acetate/hexanes as eluent.

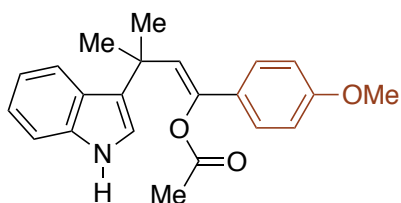

**(Z)-3-(1*H*-Indol-3-yl)-1-(4-methoxyphenyl)-3-methylbut-1-en-1-yl acetate (4a)**

The product was isolated by flash chromatography (ethyl acetate/hexanes 1:5) as white solid. 31 mg, 89% yield.

$^1\text{H}$  NMR (400 MHz,  $\text{CDCl}_3$ ):  $\delta$  7.95 (s, 1H), 7.80 (d,  $J$  = 7.9 Hz, 1H), 7.35-7.33 (m, 1H), 7.30 (d,  $J$  = 9.1 Hz, 2H), 7.18 (t,  $J$  = 7.5 Hz, 1H), 7.09 (t,  $J$  = 7.4 Hz, 1H), 6.99 (d,  $J$  = 2.4 Hz, 1H), 6.82 (d,  $J$  = 9.1 Hz, 2H), 5.92 (s, 1H), 3.78 (s, 3H), 1.88 (s, 3H), 1.67 (s, 6H).

$^{13}\text{C}$  NMR (100 MHz,  $\text{CDCl}_3$ ):  $\delta$  169.2, 159.6, 145.0, 137.1, 129.2, 126.3, 126.2, 125.3, 124.6, 121.8, 121.2, 119.5, 119.2, 114.0, 111.3, 55.4, 35.7, 29.3, 20.6.

HRMS (ESI): Calcd for  $\text{C}_{22}\text{H}_{23}\text{NO}_3\text{Na}$   $[\text{M}+\text{Na}]^+$ : 372.1570; found: 372.1573.

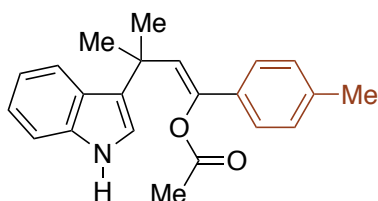

**(Z)-3-(1*H*-Indol-3-yl)-3-methyl-1-(*p*-tolyl)-but-1-en-1-yl acetate (4b)**

The product was isolated by flash chromatography (ethyl acetate/hexanes 1:10) as brown oil. 27 mg, 81% yield.

$^1\text{H}$  NMR (600 MHz,  $\text{CDCl}_3$ ):  $\delta$  7.93 (s, 1H), 7.79 (d,  $J = 8.0$  Hz, 1H), 7.35 (d,  $J = 8.2$  Hz, 1H), 7.26 (d,  $J = 8.2$  Hz, 2H), 7.18 (t,  $J = 7.6$  Hz, 1H), 7.10-7.07 (m, 3H), 7.00 (d,  $J = 2.3$  Hz, 1H), 5.99 (s, 1H), 2.32 (s, 3H), 1.88 (s, 3H), 1.67 (s, 6H).

$^{13}\text{C}$  NMR (150 MHz,  $\text{CDCl}_3$ ):  $\delta$  169.2, 145.4, 138.0, 137.1, 133.7, 129.2, 126.3, 125.4, 125.3, 124.7, 121.9, 121.2, 119.5, 119.3, 111.2, 35.8, 29.2, 21.2, 20.6.

HRMS (ESI): Calcd for  $\text{C}_{22}\text{H}_{23}\text{NO}_2\text{Na}$   $[\text{M}+\text{Na}]^+$ : 356.1626; found: 356.1611.

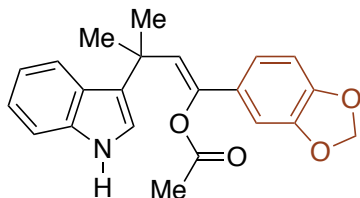

**(Z)-1-(Benzo[d][1,3]dioxol-5-yl)-3-(1H-indol-3-yl)-3-methylbut-1-en-1-yl acetate (4c)**

The product was isolated by flash chromatography (ethyl acetate/hexanes 1:5) as brown oil. 29 mg, 80% yield.

$^1\text{H}$  NMR (600 MHz,  $\text{CDCl}_3$ ):  $\delta$  7.95 (s, 1H), 7.78 (d,  $J = 8.0$  Hz, 1H), 7.34 (d,  $J = 8.1$  Hz, 1H), 7.18 (t,  $J = 7.5$  Hz, 1H), 7.09 (t,  $J = 7.5$  Hz, 1H), 6.99 (d,  $J = 2.3$  Hz, 1H), 6.87-6.85 (m, 2H), 6.72 (d,  $J = 8.6$  Hz, 1H), 5.92 (s, 2H), 5.89 (s, 1H), 1.87 (s, 3H), 1.66 (s, 6H).

$^{13}\text{C}$  NMR (150 MHz,  $\text{CDCl}_3$ ):  $\delta$  169.1, 147.9, 147.6, 144.9, 137.1, 131.0, 126.3, 125.2, 121.9, 121.1, 119.5, 119.3, 118.8, 111.3, 108.3, 105.6, 101.3, 35.8, 29.2, 20.6.

HRMS (ESI): Calcd for  $\text{C}_{22}\text{H}_{21}\text{NO}_4\text{Na}$   $[\text{M}+\text{Na}]^+$ : 386.1363; found: 386.1367.

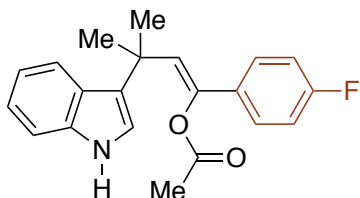

**(Z)-1-(4-Fluorophenyl)-3-(1H-indol-3-yl)-3-methylbut-1-en-1-yl acetate (4d)**

The product was isolated by flash chromatography (ethyl acetate/hexanes 1:5) as yellow oil. 27 mg, 81% yield.

$^1\text{H}$  NMR (600 MHz,  $\text{CDCl}_3$ ):  $\delta$  7.95 (s, 1H), 7.78 (d,  $J = 8.0$  Hz, 1H), 7.36-7.32 (m, 3H), 7.19 (t,  $J = 7.6$  Hz, 1H), 7.10 (t,  $J = 7.5$  Hz, 1H), 7.00-6.96 (m, 3H), 5.95 (s, 1H), 1.88 (s, 3H), 1.67 (s, 6H).

$^{13}\text{C}$  NMR (150 MHz,  $\text{CDCl}_3$ ):  $\delta$  169.1, 162.6 (d,  $J_{\text{CF}} = 247.4$  Hz), 144.4, 137.1, 132.8 (d,  $J_{\text{CF}} = 3.3$  Hz), 126.7 (d,  $J_{\text{CF}} = 8.3$  Hz), 126.3, 126.2 (d,  $J_{\text{CF}} = 1.6$  Hz), 125.1, 122.0, 121.1, 119.5, 119.3, 115.5 (d,  $J_{\text{CF}} = 21.7$  Hz), 111.3, 35.8, 29.2, 20.6.

$^{19}\text{F}$  NMR (564.9 MHz,  $\text{CDCl}_3$ ):  $\delta$  -113.9.

HRMS (ESI): Calcd for  $\text{C}_{21}\text{H}_{20}\text{FNO}_2\text{Na}$   $[\text{M}+\text{Na}]^+$ : 360.1370; found: 360.1374.



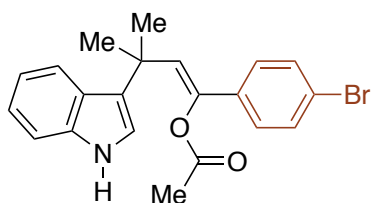

**(Z)-1-(4-Bromophenyl)-3-(1H-indol-3-yl)-3-methylbut-1-en-1-yl acetate (4e)**

The product was isolated by flash chromatography (ethyl acetate/hexanes 1:5) as yellow oil. 33 mg, 83% yield.

$^1\text{H}$  NMR (600 MHz,  $\text{CDCl}_3$ ):  $\delta$  7.95 (s, 1H), 7.76 (d,  $J = 8.0$  Hz, 1H), 7.41 (d,  $J = 8.4$  Hz, 2H), 7.35 (d,  $J = 8.1$  Hz, 1H), 7.23 (d,  $J = 8.4$  Hz, 2H), 7.19 (t,  $J = 7.5$  Hz, 1H), 7.09 (t,  $J = 7.5$  Hz, 1H), 7.00 (d,  $J = 2.4$  Hz, 1H), 6.01 (s, 1H), 1.88 (s, 3H), 1.67 (s, 6H).

$^{13}\text{C}$  NMR (150 MHz,  $\text{CDCl}_3$ ):  $\delta$  169.0, 144.4, 137.1, 135.6, 131.7, 127.0, 126.5, 126.2, 125.0, 122.05, 121.98, 121.0, 119.5, 119.4, 111.3, 35.9, 29.1, 20.5.

HRMS (ESI): Calcd for  $\text{C}_{21}\text{H}_{20}^{79}\text{BrNO}_2\text{Na}$   $[\text{M}+\text{Na}]^+$ : 420.0570; found: 420.0569.

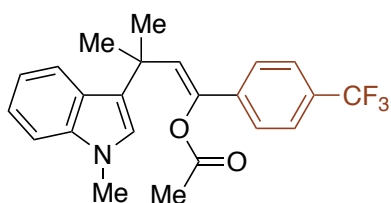

**(Z)-3-Methyl-3-(1-methyl-1H-indol-3-yl)-1-(4-(trifluoromethyl)phenyl)but-1-en-1-yl acetate (4f)**

The product was isolated by flash chromatography (ethyl acetate/hexanes 1:40) as yellow oil. 28 mg, 70% yield in HFIP.

$^1\text{H}$  NMR (600 MHz,  $\text{CDCl}_3$ ):  $\delta$  7.74 (d,  $J = 8.0$  Hz, 1H), 7.54 (d,  $J = 8.4$  Hz, 2H), 7.46 (d,  $J = 8.4$  Hz, 2H), 7.31 (d,  $J = 8.2$  Hz, 1H), 7.23 (t,  $J = 7.6$  Hz, 1H), 7.09 (t,  $J = 7.5$  Hz, 1H), 6.88 (s, 1H), 6.10 (s, 1H), 3.77 (s, 3H), 1.91 (s, 3H), 1.68 (s, 6H).

$^{13}\text{C}$  NMR (150 MHz,  $\text{CDCl}_3$ ):  $\delta$  168.9, 144.0, 140.1 (q,  $J_{\text{CF}} = 1.5$  Hz), 137.8, 129.9 (q,  $J_{\text{CF}} = 32.5$  Hz), 128.8, 126.6, 125.6 (q,  $J_{\text{CF}} = 4.1$  Hz), 125.1, 124.5, 123.3, 121.6, 121.0, 118.9, 109.4, 100.0, 36.0, 32.7, 29.1, 20.5.

$^{19}\text{F}$  NMR (564.9 MHz,  $\text{CDCl}_3$ ):  $\delta$  -62.5.

HRMS (ESI): Calcd for  $\text{C}_{23}\text{H}_{22}\text{F}_3\text{NO}_2\text{Na}$   $[\text{M}+\text{Na}]^+$ : 424.1495; found: 424.1496.

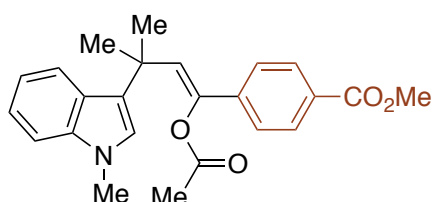

**Methyl (Z)-4-(1-acetoxy-3-methyl-3-(1-methyl-1H-indol-3-yl)but-1-en-1-yl)benzoate (4g)**

The product was isolated by flash chromatography (ethyl acetate/hexanes 1:30) as yellow oil. 32 mg, 82% yield in HFIP.

$^1\text{H}$  NMR (600 MHz,  $\text{CDCl}_3$ ):  $\delta$  7.95 (d,  $J = 8.4$  Hz, 2H), 7.75 (d,  $J = 7.9$  Hz, 1H), 7.41 (d,  $J = 8.4$  Hz, 2H), 7.30 (d,  $J = 8.1$  Hz, 1H), 7.22 (t,  $J = 7.6$  Hz, 1H), 7.08 (t,  $J = 7.5$  Hz, 1H), 6.87 (s, 1H), 6.13 (s, 1H), 3.90 (s, 3H), 3.76 (s, 3H), 1.91 (s, 3H), 1.68 (s, 6H).

$^{13}\text{C}$  NMR (150 MHz,  $\text{CDCl}_3$ ):  $\delta$  168.9, 166.8, 144.3, 140.9, 137.8, 129.9, 129.5, 128.8, 126.6, 124.6, 124.5, 123.3, 121.6, 121.1, 118.9, 109.4, 52.2, 36.1, 32.7, 29.1, 20.5.

HRMS (ESI): Calcd for  $\text{C}_{24}\text{H}_{25}\text{NO}_4\text{Na}$   $[\text{M}+\text{Na}]^+$ : 414.1676; found: 414.1679.

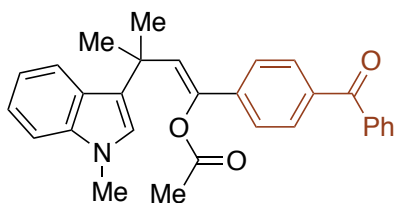

**(Z)-1-(4-Benzoylphenyl)-3-methyl-3-(1-methyl-1H-indol-3-yl)but-1-en-1-yl acetate (4h)**

The product was isolated by flash chromatography (ethyl acetate/hexanes 1:10) as pale-yellow oil. 32 mg, 74% yield in HFIP.

$^1\text{H}$  NMR (600 MHz,  $\text{CDCl}_3$ ):  $\delta$  7.77-7.75 (m, 3H), 7.73 (d,  $J = 8.4$  Hz, 2H), 7.57 (t,  $J = 7.3$  Hz, 1H), 7.47 (d,  $J = 7.7$  Hz, 2H), 7.46 (d,  $J = 8.4$  Hz, 2H), 7.30 (d,  $J = 8.2$  Hz, 1H), 7.22 (t,  $J = 7.6$  Hz, 1H), 7.09 (t,  $J = 7.5$  Hz, 1H), 6.88 (s, 1H), 6.17 (s, 1H), 3.76 (s, 3H), 1.92 (s, 3H), 1.69 (s, 6H).

$^{13}\text{C}$  NMR (150 MHz,  $\text{CDCl}_3$ ):  $\delta$  196.1, 168.9, 144.3, 140.4, 137.8, 137.7, 136.8, 132.5, 130.5, 130.1, 128.9, 128.4, 126.6, 124.54, 124.48, 123.3, 121.6, 121.1, 118.9, 109.4, 36.1, 32.7, 29.1, 20.5.

HRMS (ESI): Calcd for  $\text{C}_{29}\text{H}_{28}\text{NO}_3$   $[\text{M}+\text{H}]^+$ : 438.2064; found: 438.2067.

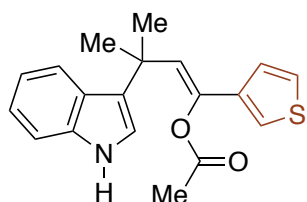

**(Z)-3-(1H-Indol-3-yl)-3-methyl-1-(thiophen-3-yl)but-1-en-1-yl acetate (4i)**

The product was isolated by flash chromatography (ethyl acetate/hexanes 1:10) as brown oil. 24 mg, 74% yield.

$^1\text{H}$  NMR (600 MHz,  $\text{CDCl}_3$ ):  $\delta$  7.96 (s, 1H), 7.77 (d,  $J = 8.0$  Hz, 1H), 7.35 (d,  $J = 8.1$  Hz, 1H), 7.23 (dd,  $J = 5.1$ , 3.0 Hz, 1H), 7.18 (t,  $J = 7.6$  Hz, 1H), 7.12 (dd,  $J = 5.1$ , 1.2 Hz, 1H), 7.09 (t,  $J = 7.5$  Hz, 1H), 7.05 (dd,  $J = 3.0$ , 1.2 Hz, 1H), 6.99 (d,  $J = 2.4$  Hz, 1H), 5.99 (s, 1H), 1.86 (s, 3H), 1.66 (s, 6H).

$^{13}\text{C}$  NMR (150 MHz,  $\text{CDCl}_3$ ):  $\delta$  169.2, 141.5, 138.3, 137.1, 126.4, 126.2, 125.5, 124.94, 124.92, 121.9, 121.2, 120.3, 119.6, 119.3, 111.3, 35.7, 29.2, 20.5.

HRMS (ESI): Calcd for  $\text{C}_{19}\text{H}_{19}\text{NO}_2\text{SNa}$   $[\text{M}+\text{Na}]^+$ : 348.1029; found: 348.1031.

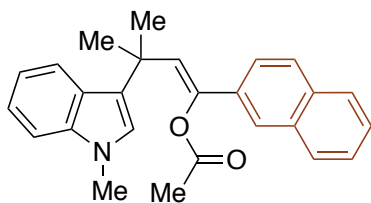

**(Z)-3-Methyl-3-(1-methyl-1H-indol-3-yl)-1-(naphthalen-2-yl)but-1-en-1-yl acetate (4j)**

The product was isolated by flash chromatography (ethyl acetate/hexanes 1:20) as yellow oil. 27 mg, 71% yield.

$^1\text{H}$  NMR (600 MHz,  $\text{CDCl}_3$ ):  $\delta$  7.83 (d,  $J = 8.0$  Hz, 1H), 7.79-7.76 (m, 4H), 7.55 (dd,  $J = 8.7, 1.7$  Hz, 1H), 7.46-7.43 (m, 2H), 7.32 (d,  $J = 8.2$  Hz, 1H), 7.24 (t,  $J = 7.6$  Hz, 1H), 7.10 (t,  $J = 7.5$  Hz, 1H), 6.91 (s, 1H), 6.18 (s, 1H), 3.78 (s, 3H), 1.96 (s, 3H), 1.73 (s, 6H).

$^{13}\text{C}$  NMR (150 MHz,  $\text{CDCl}_3$ ):  $\delta$  169.1, 145.2, 137.8, 133.9, 133.3, 133.1, 128.4, 128.3, 127.7, 127.1, 126.7, 126.4, 126.2, 124.5, 123.7, 123.6, 123.0, 121.5, 121.3, 118.8, 109.3, 36.0, 32.7, 29.3, 20.6.

HRMS (ESI): Calcd for  $\text{C}_{26}\text{H}_{25}\text{NO}_2\text{Na}$   $[\text{M}+\text{Na}]^+$ : 406.1777; found: 406.1782.

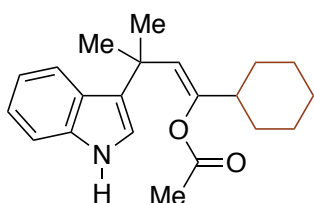

**(Z)-1-Cyclohexyl-3-(1H-indol-3-yl)-3-methylbut-1-en-1-yl acetate (4k)**

The product was isolated by flash chromatography (ethyl acetate/hexanes 1:10) as brown oil. 22 mg, 68% yield.

$^1\text{H}$  NMR (600 MHz,  $\text{CDCl}_3$ ):  $\delta$  7.88 (s, 1H), 7.72 (d,  $J = 8.0$  Hz, 1H), 7.34 (d,  $J = 8.1$  Hz, 1H), 7.17 (t,  $J = 7.6$  Hz, 1H), 7.08 (t,  $J = 7.5$  Hz, 1H), 6.94 (d,  $J = 2.4$  Hz, 1H), 5.21 (s, 1H), 2.09-2.05 (m, 1H), 1.88-1.86 (m, 2H), 1.73 (s, 3H), 1.74-1.71 (m, 2H), 1.64-1.62 (m, 2H), 1.53 (s, 6H), 1.23-1.18 (m, 2H), 1.14-1.09 (m, 2H).

$^{13}\text{C}$  NMR (150 MHz,  $\text{CDCl}_3$ ):  $\delta$  169.4, 151.7, 137.1, 126.4, 125.6, 121.8, 121.7, 121.4, 119.3, 118.9, 111.2, 42.5, 35.0, 31.4, 29.4, 26.3, 20.6.

HRMS (ESI): Calcd for  $\text{C}_{21}\text{H}_{27}\text{NO}_2\text{Na}$   $[\text{M}+\text{Na}]^+$ : 348.1934; found: 348.1938.

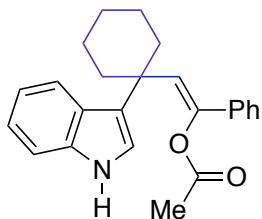

**(Z)-2-[1-(1H-Indol-3-yl)cyclohexyl]-1-phenylvinyl acetate (4l)**

The product was isolated by flash chromatography (ethyl acetate/hexanes 1:10) as yellow oil. 27 mg, 76% yield.

$^1\text{H}$  NMR (400 MHz,  $\text{CDCl}_3$ ):  $\delta$  7.92 (s, 1H), 7.75 (d,  $J = 8.0$  Hz, 1H), 7.37 (d,  $J = 7.4$  Hz, 2H), 7.33-7.28 (m, 3H), 7.25-7.22 (m, 1H), 7.14 (t,  $J = 7.3$  Hz, 1H), 7.05-7.03 (m, 2H), 6.07 (s, 1H), 2.29-2.26 (m, 2H), 2.05-2.01 (m, 2H), 1.72 (s, 3H), 1.68-1.65 (m, 6H).

$^{13}\text{C}$  NMR (100 MHz,  $\text{CDCl}_3$ ):  $\delta$  168.6, 146.5, 137.1, 136.8, 128.6, 128.0, 126.2, 124.8, 124.7, 123.8, 121.6, 121.5,

120.6, 119.0, 111.3, 39.8, 37.6, 26.4, 23.1, 20.4.

HRMS (ESI): Calcd for  $C_{24}H_{25}NO_2Na$   $[M+Na]^+$ : 382.1783; found: 382.1778.

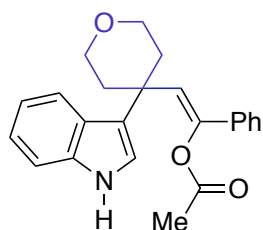

**(Z)-2-[4-(1H-Indol-3-yl)tetrahydro-2H-pyran-4-yl]-1-phenylvinyl acetate (4m)**

The product was isolated by flash chromatography (ethyl acetate/hexanes 1:3) as orange oil. 21 mg, 59% yield in HFIP.

$^1H$  NMR (600 MHz,  $CDCl_3$ ):  $\delta$  8.02 (s, 1H), 7.73 (d,  $J = 8.1$  Hz, 1H), 7.38-7.35 (m, 3H), 7.32-7.26 (m, 3H), 7.17 (t,  $J = 7.6$  Hz, 1H), 7.09-7.06 (m, 2H), 6.09 (s, 1H), 3.91-3.82 (m, 4H), 2.37-2.25 (m, 4H), 1.76 (s, 3H).

$^{13}C$  NMR (150 MHz,  $CDCl_3$ ):  $\delta$  168.3, 147.5, 137.2, 136.4, 128.6, 128.4, 125.9, 124.9, 123.2, 122.1, 122.0, 121.1, 120.8, 119.4, 111.5, 64.9, 37.5, 37.4, 20.5.

HRMS (ESI): Calcd for  $C_{23}H_{23}NO_3Na$   $[M+Na]^+$ : 384.1570; found: 384.1574.

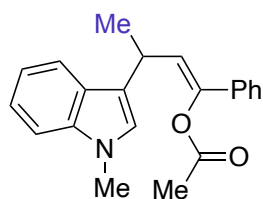

**(Z)-3-(1-Methyl-1H-indol-3-yl)-1-phenylbut-1-en-1-yl acetate (4n)**

The product was isolated by flash chromatography (ethyl acetate/hexanes 1:20) as yellow oil. 22 mg, 69% yield in HFIP.

$^1H$  NMR (600 MHz,  $CDCl_3$ ):  $\delta$  7.70 (d,  $J = 7.9$  Hz, 1H), 7.41 (d,  $J = 7.2$  Hz, 2H), 7.31-7.28 (m, 4H), 7.22 (t,  $J = 7.6$  Hz, 1H), 7.10 (t,  $J = 7.4$  Hz, 1H), 6.89 (s, 1H), 5.94 (d,  $J = 9.8$  Hz, 1H), 4.05-4.00 (m, 1H), 3.76 (s, 3H), 2.34 (s, 3H), 1.53 (d,  $J = 9.9$  Hz, 3H).

$^{13}C$  NMR (150 MHz,  $CDCl_3$ ):  $\delta$  169.2, 144.8, 137.4, 135.2, 128.6, 128.2, 127.3, 125.1, 124.7, 123.4, 121.8, 119.8, 119.0, 118.6, 109.3, 32.8, 28.8, 20.9, 20.5.

HRMS (ESI): Calcd for  $C_{21}H_{21}NO_2Na$   $[M+Na]^+$ : 342.1464; found: 342.1465.

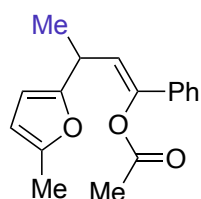

**(Z)-3-(5-Methylfuran-2-yl)-1-phenylbut-1-en-1-yl acetate (4o)**

The product was isolated by flash chromatography (ethyl acetate/hexanes 1:40) as yellow oil. 17 mg, 63% yield in HFIP.

$^1\text{H}$  NMR (600 MHz,  $\text{CDCl}_3$ ):  $\delta$  7.42 (d,  $J = 8.6$  Hz, 2H), 7.34-7.31 (m, 2H), 7.28 (t,  $J = 7.3$  Hz, 1H), 5.92 (d,  $J = 3.0$  Hz, 1H), 5.86-5.84 (m, 2H), 3.82-3.76 (m, 1H), 2.30 (s, 3H), 2.25 (s, 3H), 1.39 (d,  $J = 7.0$  Hz, 3H).

$^{13}\text{C}$  NMR (150 MHz,  $\text{CDCl}_3$ ):  $\delta$  169.0, 155.9, 151.0, 146.1, 135.0, 128.6, 128.5, 124.7, 120.2, 106.0, 104.9, 31.1, 20.8, 19.2, 13.7.

HRMS (ESI): Calcd for  $\text{C}_{17}\text{H}_{18}\text{O}_3\text{Na}$   $[\text{M}+\text{Na}]^+$ : 293.1148; found: 293.1139.

(C) The procedure for reactions in the scope of propargylic esters: Unless otherwise stated, the procedure was as follows. In an argon-filled glove box,  $\text{Pd}(\text{acac})_2$  (24.5 mg, 0.08 mmol),  $\text{P}(2\text{-furyl})_3$  (22.3 mg, 0.096 mmol) and 2 mL of HFIP were charged into an oven-dried 8-mL vial. After stirring for about 30 minutes at rt, the yellow solution of Pd complex was ready for use.

To another oven-dried 4-mL vial, 0.1 mL of the Pd complex (0.004 mmol, 4 mol%) from the stock solution was added under argon, followed by the sequential addition of *N*-methyl indole (19  $\mu\text{L}$ , 0.15 mmol), formic acid (0.8  $\mu\text{L}$ , 0.02 mmol) and propargylic ester (0.1 mmol). The vial was sealed with a screw cap and placed in a heating block maintained at 30  $^\circ\text{C}$ . After stirring for 24 hours, the crude reaction mixture was purified by flash chromatography on silica using ethyl acetate/hexanes as eluent.

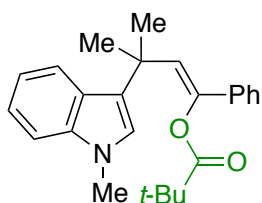

### (*Z*)-3-Methyl-3-(1-methyl-1*H*-indol-3-yl)-1-phenylbut-1-en-1-yl pivalate (**5a**)

The product was isolated by flash chromatography (ethyl acetate/hexanes 1:40) as pale-yellow oil. 29 mg, 78% yield.

$^1\text{H}$  NMR (600 MHz,  $\text{CDCl}_3$ ):  $\delta$  7.84 (d,  $J = 8.0$  Hz, 1H), 7.39-7.37 (m, 2H), 7.31-7.28 (m, 3H), 7.27-7.22 (m, 2H), 7.11 (t,  $J = 7.0$  Hz, 1H), 6.88 (s, 1H), 5.98 (s, 1H), 3.75 (s, 3H), 1.69 (s, 6H), 1.20 (s, 9H).

$^{13}\text{C}$  NMR (150 MHz,  $\text{CDCl}_3$ ):  $\delta$  176.2, 145.9, 137.8, 137.6, 128.4, 128.0, 127.2, 126.5, 125.1, 124.5, 124.1, 121.4, 121.2, 118.7, 109.3, 39.0, 35.8, 32.7, 29.3, 27.2.

HRMS (ESI): Calcd for  $\text{C}_{25}\text{H}_{29}\text{NO}_2\text{Na}$   $[\text{M}+\text{Na}]^+$ : 398.2090; found: 398.2094.

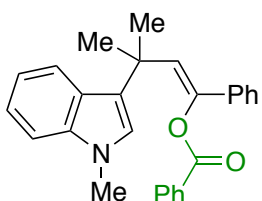

### (*Z*)-3-Methyl-3-(1-methyl-1*H*-indol-3-yl)-1-phenylbut-1-en-1-yl benzoate (**5b**)

The product was isolated by flash chromatography (ethyl acetate/hexanes 1:30) as white solid. 30 mg, 76% yield.  $^1\text{H}$  NMR (600 MHz,  $\text{CDCl}_3$ ):  $\delta$  7.80 (d,  $J = 8.0$  Hz, 1H), 7.57 (d,  $J = 6.9$  Hz, 2H), 7.54 (t,  $J = 7.3$  Hz, 1H), 7.42 (d,  $J = 7.8$  Hz, 2H), 7.34-7.31 (m, 2H), 7.30-7.27 (m, 2H), 7.25-7.23 (m, 2H), 7.18 (d,  $J = 8.0$  Hz, 1H), 7.11 (t,  $J = 7.0$  Hz, 1H), 6.68 (s, 1H), 6.20 (s, 1H), 3.33 (s, 3H), 1.68 (s, 6H).

$^{13}\text{C}$  NMR (150 MHz,  $\text{CDCl}_3$ ):  $\delta$  164.2, 145.0, 137.8, 136.3, 133.1, 129.9, 129.3, 128.5, 128.2, 128.1, 126.9, 126.3, 124.8, 124.5, 122.9, 121.3, 121.2, 118.6, 109.3, 35.7, 32.1, 29.7.

HRMS (ESI): Calcd for  $\text{C}_{27}\text{H}_{25}\text{NO}_2\text{Na}$   $[\text{M}+\text{Na}]^+$ : 418.1777; found: 418.1781.

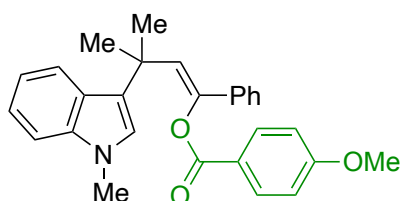

### **(Z)-3-Methyl-3-(1-methyl-1H-indol-3-yl)-1-phenylbut-1-en-1-yl 4-methoxybenzoate (5c)**

The product was isolated by flash chromatography (ethyl acetate/hexanes 1:20) as yellow oil. 30 mg, 70% yield.  $^1\text{H}$  NMR (600 MHz,  $\text{CDCl}_3$ ):  $\delta$  7.80 (d,  $J = 8.1$  Hz, 1H), 7.55 (d,  $J = 8.8$  Hz, 2H), 7.40 (d,  $J = 7.6$  Hz, 2H), 7.28-7.19 (m, 5H), 7.10 (t,  $J = 7.3$  Hz, 1H), 6.82 (d,  $J = 8.8$  Hz, 2H), 6.70 (s, 1H), 6.17 (s, 1H), 3.86 (s, 3H), 3.41 (s, 3H), 1.67 (s, 6H).

$^{13}\text{C}$  NMR (150 MHz,  $\text{CDCl}_3$ ):  $\delta$  164.1, 163.5, 145.0, 137.7, 136.5, 132.1, 128.5, 128.0, 126.8, 126.3, 124.8, 124.5, 123.2, 121.7, 121.3, 121.2, 118.6, 113.5, 109.3, 55.6, 35.7, 32.3, 29.6.

HRMS (ESI): Calcd for  $\text{C}_{28}\text{H}_{27}\text{NO}_3\text{Na}$   $[\text{M}+\text{Na}]^+$ : 448.1883; found: 448.1890.

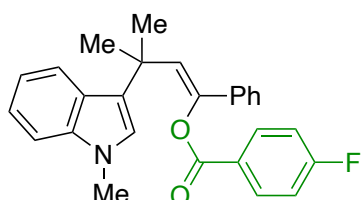

### **(Z)-3-Methyl-3-(1-methyl-1H-indol-3-yl)-1-phenylbut-1-en-1-yl 4-fluorobenzoate (5d)**

The product was isolated by flash chromatography (ethyl acetate/hexanes 1:40) as yellow oil. 38 mg, 93% yield.  $^1\text{H}$  NMR (600 MHz,  $\text{CDCl}_3$ ):  $\delta$  7.79 (d,  $J = 8.0$  Hz, 1H), 7.49 (dd,  $J = 8.9, 5.5$  Hz, 2H), 7.41 (d,  $J = 6.9$  Hz, 2H), 7.31-7.23 (m, 4H), 7.18 (d,  $J = 8.3$  Hz, 1H), 7.11 (t,  $J = 7.4$  Hz, 1H), 6.99 (t,  $J = 8.7$  Hz, 2H), 6.67 (s, 1H), 6.19 (s, 1H), 3.36 (s, 3H), 1.67 (s, 6H).

$^{13}\text{C}$  NMR (150 MHz,  $\text{CDCl}_3$ ):  $\delta$  165.8 (d,  $J_{\text{CF}} = 254.3$  Hz), 163.2, 144.7, 137.7, 136.1, 132.5 (d,  $J_{\text{CF}} = 9.4$  Hz), 128.6, 128.2, 126.9, 126.3, 125.4 (d,  $J_{\text{CF}} = 2.9$  Hz), 124.8, 124.5, 122.7, 121.4, 121.2, 118.6, 115.2 (d,  $J_{\text{CF}} = 21.9$  Hz), 109.3, 35.6, 32.1, 29.8.

$^{19}\text{F}$  NMR (564.9 MHz,  $\text{CDCl}_3$ ):  $\delta$  -105.3.

HRMS (ESI): Calcd for  $\text{C}_{27}\text{H}_{24}\text{FNO}_2\text{Na}$   $[\text{M}+\text{Na}]^+$ : 436.1683; found: 436.1686.

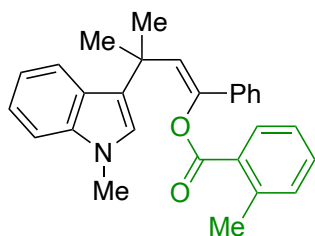

**(Z)-3-Methyl-3-(1-methyl-1*H*-indol-3-yl)-1-phenylbut-1-en-1-yl 2-methylbenzoate (5e)**

The product was isolated by flash chromatography (ethyl acetate/hexanes 1:40) as yellow oil. 27 mg, 66% yield.

<sup>1</sup>H NMR (600 MHz, CDCl<sub>3</sub>): δ 7.79 (d, *J* = 8.0 Hz, 1H), 7.52 (d, *J* = 7.8 Hz, 1H), 7.43 (d, *J* = 7.1 Hz, 2H), 7.40 (t, *J* = 7.5 Hz, 1H), 7.30-7.24 (m, 3H), 7.20-7.14 (m, 4H), 7.09 (t, *J* = 8.0 Hz, 1H), 6.68 (s, 1H), 6.18 (s, 1H), 3.38 (s, 3H), 2.40 (s, 3H), 1.68 (s, 6H).

<sup>13</sup>C NMR (150 MHz, CDCl<sub>3</sub>): δ 164.3, 145.4, 141.8, 137.7, 136.6, 132.4, 131.8, 131.3, 128.6, 128.0, 127.8, 126.7, 126.5, 125.6, 124.8, 124.4, 123.2, 121.4, 121.3, 118.6, 109.2, 35.6, 32.2, 29.7, 22.1.

HRMS (ESI): Calcd for C<sub>28</sub>H<sub>27</sub>NO<sub>2</sub>Na [M+Na]<sup>+</sup>: 432.1934; found: 432.1939.

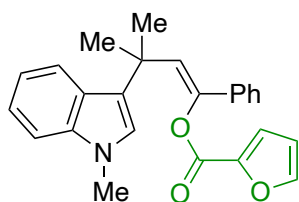

**(Z)-3-Methyl-3-(1-methyl-1*H*-indol-3-yl)-1-phenylbut-1-en-1-yl furan-2-carboxylate (5f)**

The product was isolated by flash chromatography (ethyl acetate/hexanes 1:20) as yellow oil. 18 mg, 47% yield.

<sup>1</sup>H NMR (600 MHz, CDCl<sub>3</sub>): δ 7.77 (d, *J* = 7.9 Hz, 1H), 7.55 (s, 1H), 7.39 (d, *J* = 7.0 Hz, 2H), 7.29-7.24 (m, 3H), 7.21 (d, *J* = 3.6 Hz, 2H), 7.09-7.06 (m, 1H), 6.75 (s, 1H), 6.49 (d, *J* = 3.5 Hz, 1H), 6.43 (dd, *J* = 3.5, 1.8 Hz, 1H), 6.15 (s, 1H), 3.52 (s, 3H), 1.67 (s, 6H).

<sup>13</sup>C NMR (150 MHz, CDCl<sub>3</sub>): δ 156.4, 146.9, 144.0, 143.9, 137.8, 136.0, 128.6, 128.2, 126.8, 126.7, 124.9, 124.6, 122.8, 121.4, 121.2, 118.6, 118.5, 111.8, 109.2, 35.8, 32.4, 29.5.

HRMS (ESI): Calcd for C<sub>25</sub>H<sub>23</sub>NO<sub>3</sub>Na [M+Na]<sup>+</sup>: 408.1570; found: 408.1576.

**IV. Substrate synthesis**

**Table S5.** The scope of substituted propargylic acetates<sup>1,2</sup>

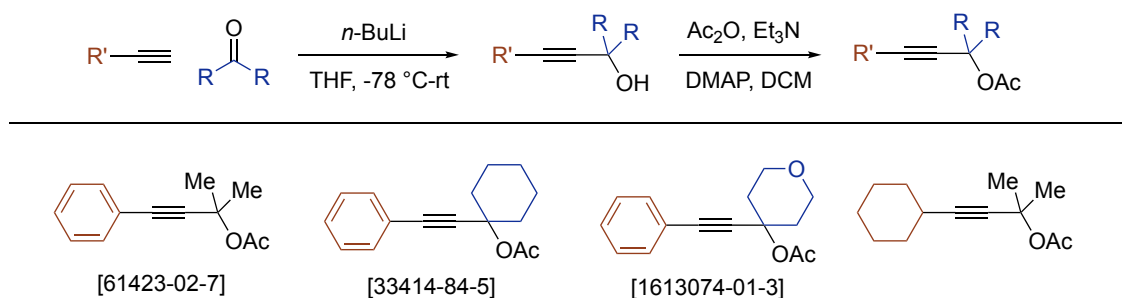

Method A: Under argon, a solution of 2M *n*-BuLi in cyclohexane (2.5 mL, 5 mmol) was added to a solution of

terminal alkyne (5 mmol) in anhydrous THF (10 mL) at -78 °C. After the reaction was stirred for another 15 minutes, dialkyl ketone (5.5 mmol) in anhydrous THF (5 mL) was added dropwise. After the addition, the mixture was warmed to rt and quenched with aqueous NH<sub>4</sub>Cl (5 mL) and extracted with ethyl acetate. The combined organic layers were dried over Na<sub>2</sub>SO<sub>4</sub>, concentrated and used directly in the next step without purification.

To a solution of the crude alcohol in dry DCM (10 mL) was added Et<sub>3</sub>N (1 mL, 7.2 mmol), Ac<sub>2</sub>O (0.7 mL, 7.4 mmol) and DMAP (50 mg) at rt. After stirring at rt overnight, the reaction mixture was concentrated directly under vacuum and subjected to flash chromatography using ethyl acetate/hexanes as elute.

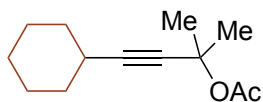

#### 4-Cyclohexyl-2-methylbut-3-yn-2-yl acetate

<sup>1</sup>H NMR (600 MHz, CDCl<sub>3</sub>): δ 2.39-2.35 (m, 1H), 1.98 (s, 3H), 1.74-1.71 (m, 2H), 1.68-1.64 (m, 2H), 1.61 (s, 6H), 1.48-1.38 (m, 3H), 1.31-1.23 (m, 3H).

<sup>13</sup>C NMR (150 MHz, CDCl<sub>3</sub>): δ 169.5, 88.7, 81.6, 72.8, 32.6, 29.5, 28.9, 26.0, 24.8, 22.3.

LC-MS (ESI): Calcd for C<sub>13</sub>H<sub>21</sub>O<sub>2</sub> [M+H]<sup>+</sup>: 209.15; found: 209.15.

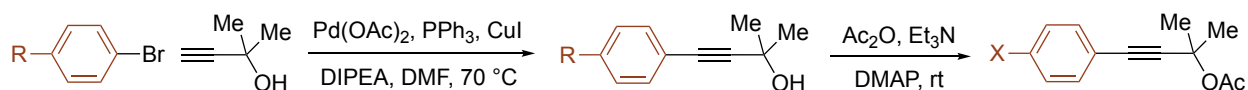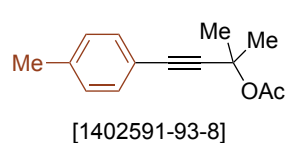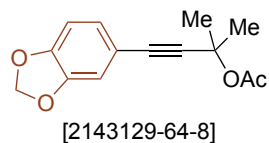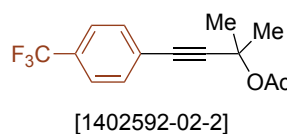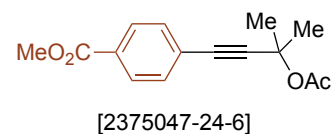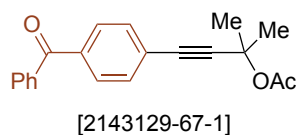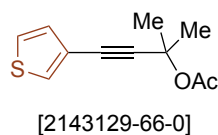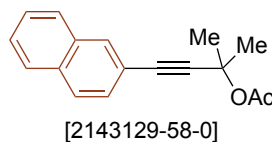

Method B: Under argon, Pd(OAc)<sub>2</sub> (56 mg, 0.25 mmol), CuI (95.2 mg, 0.5 mmol), PPh<sub>3</sub> (131.1 mg, 0.5 mmol) and anhydrous DMF (10 mL) were added to a dry flask and the mixture was stirred at room temperature for 10 minutes. Afterwards, aryl bromide (5 mmol), 2-methylbut-3-yn-2-ol (727 μL, 7.5 mmol) and DIPEA (3.5 mL, 20 mmol) were added successively at room temperature, then the resulting mixture was heated at 70 °C overnight. The reaction was quenched with saturated NH<sub>4</sub>Cl solution and extracted with diethyl ether. The organic layers were combined, dried with Na<sub>2</sub>SO<sub>4</sub> and concentrated under the reduced pressure. The crude product was directly used in the next step.

To a solution of the crude alcohol in DCM (10 mL) was added Et<sub>3</sub>N (1 mL, 7.2 mmol), Ac<sub>2</sub>O (0.7 mL, 7.4 mmol) and DMAP (50 mg) at rt. After stirring at rt overnight, the reaction mixture was concentrated directly under vacuum and subjected to flash chromatography using ethyl acetate/hexanes as elute.



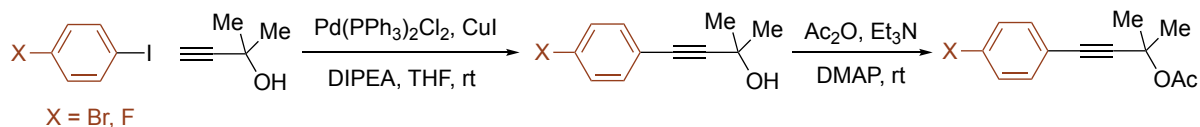

Method C: Under argon, Pd(PPh<sub>3</sub>)<sub>2</sub>Cl<sub>2</sub> (140.4 mg, 0.2 mmol), CuI (38.1 mg, 0.2 mmol) and anhydrous THF (10 mL) were added to a dry flask and the mixture was stirred at room temperature for 5 minutes. Afterwards, aryl iodide (5 mmol), 2-methylbut-3-yn-2-ol (504 μL, 5.2 mmol) and DIPEA (1.5 mL, 8.5 mmol) were added successively at rt. After stirring overnight, the reaction was quenched with saturated NH<sub>4</sub>Cl solution and extracted with ethyl acetate. The organic layers were combined, dried with Na<sub>2</sub>SO<sub>4</sub> and concentrated under the reduced pressure. The crude product was directly used in the next step.

To a solution of the crude alcohol in DCM (10 mL) was added Et<sub>3</sub>N (1 mL, 7.2 mmol), Ac<sub>2</sub>O (0.7 mL, 7.4 mmol) and DMAP (50 mg) at rt. After stirring at rt overnight, the reaction mixture was concentrated directly under vacuum and subjected to flash chromatography using ethyl acetate/hexanes as elute.

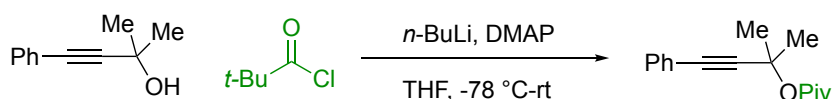

### 2-Methyl-4-phenylbut-3-yn-2-yl pivalate [1911590-37-8]<sup>3</sup>

<sup>1</sup>H NMR (600 MHz, CDCl<sub>3</sub>): δ 7.42-7.39 (m, 2H), 7.28-7.25 (m, 3H), 1.73 (s, 6H), 1.19 (s, 9H).

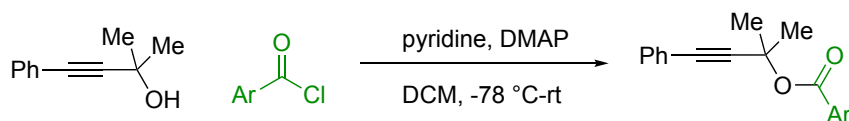

### 2-Methyl-4-phenylbut-3-yn-2-yl benzoate [41930-23-8]<sup>4</sup>

<sup>1</sup>H NMR (600 MHz, CDCl<sub>3</sub>): δ 8.06 (d, *J* = 7.7 Hz, 2H), 7.55 (t, *J* = 7.4 Hz, 1H), 7.46-7.43 (m, 4H), 7.29-7.26 (m, 3H), 1.91 (s, 6H).

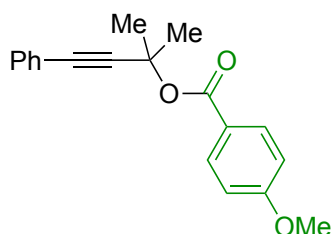

### 2-Methyl-4-phenylbut-3-yn-2-yl 4-methoxybenzoate

<sup>1</sup>H NMR (600 MHz, CDCl<sub>3</sub>): δ 7.99 (d, *J* = 9.1 Hz, 2H), 7.44-7.42 (m, 2H), 7.27-7.25 (m, 3H), 6.90 (d, *J* = 9.1 Hz, 2H), 3.85 (s, 3H), 1.88 (s, 6H).

<sup>13</sup>C NMR (150 MHz, CDCl<sub>3</sub>): δ 164.7, 163.4, 132.0, 131.8, 128.4, 128.3, 123.7, 122.9, 113.6, 90.6, 84.2, 72.8, 55.6, 29.4.

LC-MS (ESI): Calcd for C<sub>19</sub>H<sub>19</sub>O<sub>3</sub> [M+H]<sup>+</sup>: 295.13; found: 295.17.

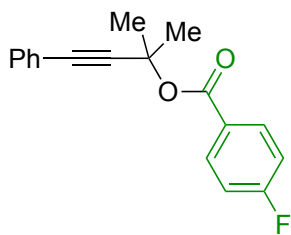

### 2-Methyl-4-phenylbut-3-yn-2-yl 4-fluorobenzoate

$^1\text{H}$  NMR (600 MHz,  $\text{CDCl}_3$ ):  $\delta$  8.05 (dd,  $J = 9.0, 5.5$  Hz, 2H), 7.44-7.42 (m, 2H), 7.28-7.26 (m, 3H), 7.11-7.08 (m, 2H), 1.89 (s, 6H).

$^{13}\text{C}$  NMR (150 MHz,  $\text{CDCl}_3$ ):  $\delta$  165.8 (d,  $J = 253.2$  Hz), 164.0, 132.3 (d,  $J = 9.2$  Hz), 132.0, 128.5, 128.3, 127.5, 122.7, 115.5 (d,  $J = 21.9$  Hz), 90.2, 84.5, 73.5, 29.4.

$^{19}\text{F}$  NMR (564.9 MHz,  $\text{CDCl}_3$ ):  $\delta$  -106.1.

LC-MS (ESI): Calcd for  $\text{C}_{18}\text{H}_{16}\text{FO}_2$   $[\text{M}+\text{H}]^+$ : 283.11; found: 283.23.

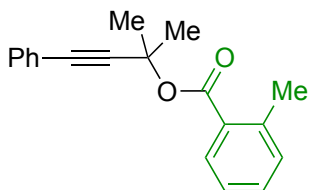

### 2-Methyl-4-phenylbut-3-yn-2-yl 2-methylbenzoate

$^1\text{H}$  NMR (600 MHz,  $\text{CDCl}_3$ ):  $\delta$  7.89 (d,  $J = 7.7$  Hz, 1H), 7.46-7.44 (m, 2H), 7.38 (t,  $J = 7.5$  Hz, 1H), 7.30-7.28 (m, 3H), 7.25-7.23 (m, 2H), 2.62 (s, 3H), 1.89 (s, 6H).

$^{13}\text{C}$  NMR (150 MHz,  $\text{CDCl}_3$ ):  $\delta$  166.2, 140.0, 132.0, 131.9, 131.8, 130.8, 130.6, 128.4, 128.3, 125.8, 122.8, 90.4, 84.3, 73.2, 29.4, 21.9.

LC-MS (ESI): Calcd for  $\text{C}_{19}\text{H}_{19}\text{O}_2$   $[\text{M}+\text{H}]^+$ : 279.14; found: 279.17.

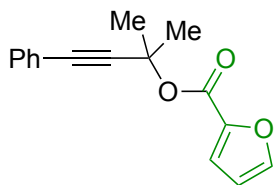

### 2-Methyl-4-phenylbut-3-yn-2-yl furan-2-carboxylate

$^1\text{H}$  NMR (600 MHz,  $\text{CDCl}_3$ ):  $\delta$  7.56 (t,  $J = 0.9$  Hz, 1H), 7.45-7.43 (m, 2H), 7.28-7.26 (m, 3H), 7.15 (d,  $J = 3.5$  Hz, 1H), 6.48 (dd,  $J = 3.4, 1.6$  Hz, 1H), 1.88 (s, 6H).

$^{13}\text{C}$  NMR (150 MHz,  $\text{CDCl}_3$ ):  $\delta$  157.2, 146.2, 145.3, 132.0, 128.5, 128.3, 122.7, 117.8, 111.9, 89.8, 84.7, 73.9, 29.4.

LC-MS (ESI): Calcd for  $\text{C}_{16}\text{H}_{15}\text{O}_3$   $[\text{M}+\text{H}]^+$ : 255.10; found: 255.17.

## V. Scale-up synthesis and product derivatization

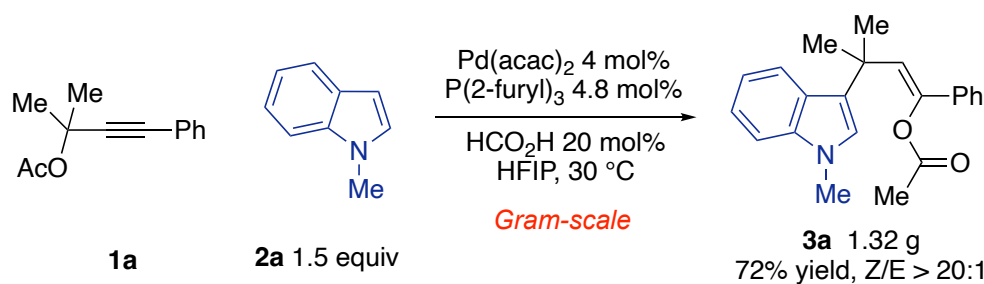

In an argon-filled glovebox,  $\text{Pd}(\text{acac})_2$  (67.0 mg, 0.22 mmol),  $\text{P}(\text{2-furyl})_3$  (61.3 mg, 0.264 mmol) and 5.5 mL of HFIP were charged into an oven-dried 20-mL vial. After stirring for about 30 minutes at rt, *N*-methylindole (1.0 mL, 8.25 mmol), formic acid (42  $\mu\text{L}$ , 1.1 mmol) and propargylic acetate **1a** (1.11 g, 5.5 mmol) were added sequentially to the reaction mixture. The vial was sealed with a screw cap and placed in a heating block maintained at 30 °C. After stirring for 24 hours, the crude reaction mixture was purified by flash chromatography on silica (ethyl acetate/hexanes 1:20) to afford **3a** in 72% yield (1.32 g, Z/E > 20:1).

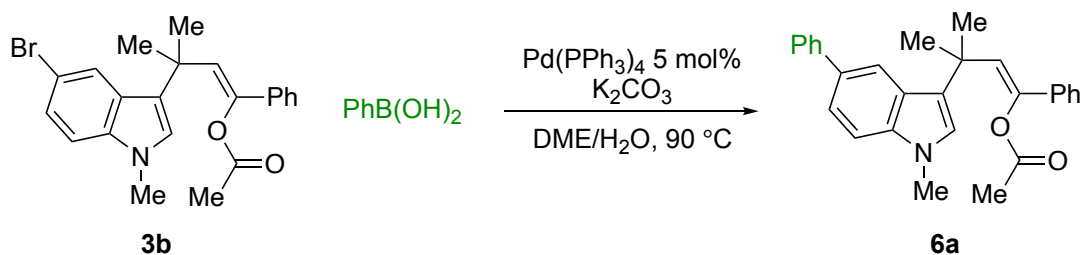

The reaction condition is modified based on the reported procedure.<sup>5</sup> To a 10-mL reaction tube in an argon-filled glove box, **3b** (41.2 mg, 0.1 mmol) and phenylboronic acid (18.3 mg, 0.15 mmol) were dissolved in DME/ $\text{H}_2\text{O}$  (0.8 mL/0.2 mL), followed by the addition of  $\text{Pd}(\text{PPh}_3)_4$  (5.8 mg, 0.005 mmol) and potassium carbonate (27.6 mg, 0.2 mmol). The reaction tube was sealed with a screw cap and placed in a heating block maintained at 90 °C. After stirring overnight, the reaction mixture was quenched with brine and extracted with ethyl acetate three times. The combined organic layers were then dried over  $\text{Na}_2\text{SO}_4$ , filtered and concentrated under reduced pressure. The crude product was purified on silica by flash chromatography (ethyl acetate/hexanes 1:5) as pale-yellow oil. 25 mg, 61% yield.

### (Z)-3-Methyl-3-(1-methyl-5-phenyl-1*H*-indol-3-yl)-1-phenylbut-1-en-1-yl acetate (**6a**)

$^1\text{H}$  NMR (600 MHz,  $\text{CDCl}_3$ ):  $\delta$  8.01 (s, 1H), 7.62 (d,  $J = 8.4$  Hz, 2H), 7.48 (d,  $J = 8.5$  Hz, 1H), 7.42-7.38 (m, 4H), 7.35 (d,  $J = 8.5$  Hz, 1H), 7.30-7.27 (m, 3H), 7.25 (t,  $J = 7.4$  Hz, 1H), 6.90 (s, 1H), 6.01 (s, 1H), 3.78 (s, 3H), 1.90 (s, 3H), 1.70 (s, 6H).

$^{13}\text{C}$  NMR (150 MHz,  $\text{CDCl}_3$ ):  $\delta$  169.1, 145.2, 142.9, 137.4, 136.7, 132.2, 128.7, 128.6, 128.1, 127.6, 127.1, 126.4, 126.3, 125.3, 124.9, 123.9, 121.4, 119.8, 109.6, 36.0, 32.8, 29.4, 20.6.

HRMS (ESI): Calcd for  $\text{C}_{28}\text{H}_{27}\text{NO}_2\text{Na}$   $[\text{M}+\text{Na}]^+$ : 432.1934; found: 432.1937.

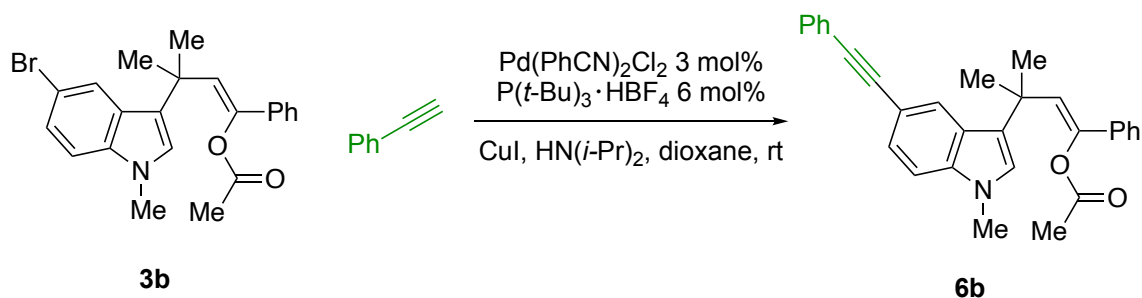

To a 10-mL reaction tube in an argon-filled glove box, **3b** (41.2 mg, 0.1 mmol), Pd(PhCN)<sub>2</sub>Cl<sub>2</sub> (1.2 mg, 0.003 mmol), P(*t*-Bu)<sub>3</sub>·HBF<sub>4</sub> (1.7 mg, 0.006 mmol), and CuI (0.4 mg, 0.002 mmol) were dissolved in dioxane (0.4 mL). Diisopropylamine (17 μL, 0.12 mmol) and phenylacetylene (13 μL, 0.12 mmol) were then added by microsyringe, and the reaction was stirred for 18 hours at rt. After complete consumption of **3b** (TLC monitoring), the solution was diluted with ethyl acetate and evaporated to dryness. The crude product was purified on silica by flash chromatography (ethyl acetate/hexanes 1:10) to give **6b** (34 mg, 78% yield) as yellow oil.

**(Z)-3-Methyl-3-[1-methyl-5-(phenylethynyl)-1H-indol-3-yl]-1-phenylbut-1-en-1-yl acetate (6b)**

<sup>1</sup>H NMR (600 MHz, CDCl<sub>3</sub>): δ 7.96 (s, 1H), 7.54 (d, *J* = 8.5 Hz, 2H), 7.40-7.37 (m, 3H), 7.34-7.28 (m, 5H), 7.26-7.23 (m, 2H), 6.89 (s, 1H), 6.02 (s, 1H), 3.75 (s, 3H), 1.85 (s, 3H), 1.67 (s, 6H).

<sup>13</sup>C NMR (150 MHz, CDCl<sub>3</sub>): δ 169.0, 145.3, 137.5, 136.4, 131.6, 128.6, 128.4, 128.2, 127.8, 126.6, 126.1, 125.8, 125.3, 125.1, 124.9, 124.2, 123.8, 113.2, 109.5, 91.6, 87.1, 35.8, 32.8, 29.5, 20.5.

HRMS (ESI): Calcd for C<sub>30</sub>H<sub>27</sub>NO<sub>2</sub>Na [M+Na]<sup>+</sup>: 456.1934; found: 456.1933.

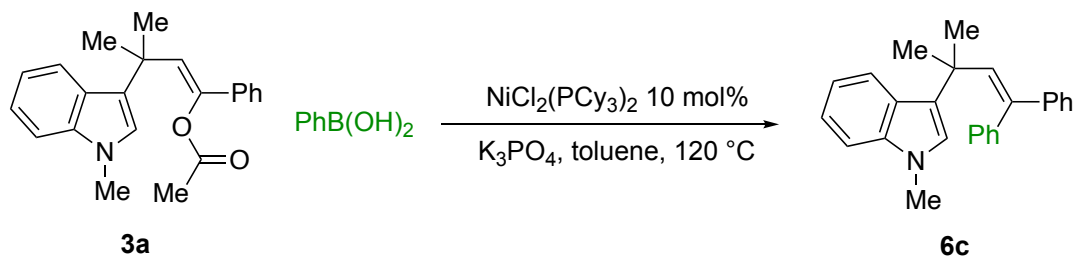

The compound is prepared according to the reported procedure with some modifications.<sup>6</sup> In an argon-filled glove box, Ni(PCy<sub>3</sub>)<sub>2</sub>Cl<sub>2</sub> (6.9 mg, 0.01 mmol), phenyl boronic acid (61.0 mg, 0.5 mmol) and K<sub>3</sub>PO<sub>4</sub> (191.0 mg, 0.9 mmol) were charged into a dry 10-mL Schlenk tube, followed by the addition of **3a** (33.3 mg, 0.1 mmol) and toluene (1 mL). The reaction mixture was sealed tightly with a Teflon-lined screw cap and stirred on a hotplate maintained at 120 °C for 48 h. After cooling down to room temperature, the crude product was purified on silica by flash chromatography (ethyl acetate/hexanes 1:70) to give **6c** (20 mg, 57% yield) as colorless oil.

**1-Methyl-3-(2-methyl-4,4-diphenylbut-3-en-2-yl)-1H-indole (6c)**

<sup>1</sup>H NMR (600 MHz, CDCl<sub>3</sub>): δ 7.74 (d, *J* = 7.9 Hz, 1H), 7.24-7.17 (m, 7H), 7.11 (t, *J* = 7.4 Hz, 1H), 7.06 (t, *J* = 7.2 Hz, 1H), 7.01-6.99 (m, 2H), 6.68 (d, *J* = 7.4 Hz, 2H), 6.56 (s, 1H), 6.38 (s, 1H), 3.57 (s, 3H), 1.52 (s, 6H).

<sup>13</sup>C NMR (150 MHz, CDCl<sub>3</sub>): δ 144.0, 140.7, 140.1, 139.1, 137.7, 129.8, 128.1, 127.1, 126.9, 126.8, 126.7, 126.0, 124.9, 124.2, 121.4, 121.1, 118.4, 109.1, 36.8, 32.4, 30.7.

LC-MS (ESI): Calcd for C<sub>26</sub>H<sub>25</sub>NNa [M+Na]<sup>+</sup>: 374.19; found: 374.27.

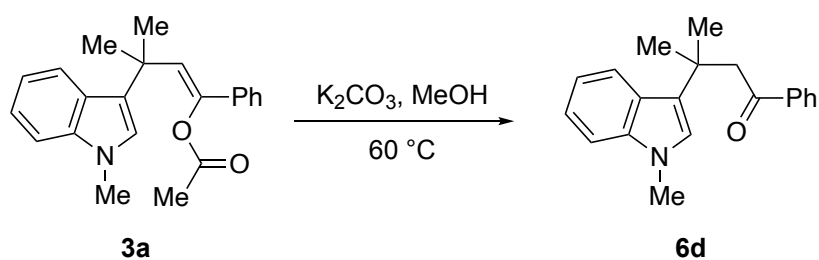

To a mixture of **3a** (33.3 mg, 0.1 mmol) and  $K_2CO_3$  (16.6 mg, 0.12 mmol) was added dry MeOH (0.5 mL). After stirring at 60 °C for 2 hours, the reaction mixture was cooled to room temperature and concentrated under reduced pressure. The product **6d** was then purified by silica gel chromatography (ethyl acetate/hexanes 1:60) as colorless oil. 26 mg, 89% yield.

### 3-Methyl-3-(1-methyl-1H-indol-3-yl)-1-phenylbutan-1-one (**6d**)

$^1H$  NMR (600 MHz,  $CDCl_3$ ):  $\delta$  7.83 (d,  $J = 8.1$  Hz, 1H), 7.76 (d,  $J = 7.8$  Hz, 2H), 7.44 (t,  $J = 7.4$  Hz, 1H), 7.30–7.25 (m, 3H), 7.20 (t,  $J = 7.6$  Hz, 1H), 7.10 (t,  $J = 7.5$  Hz, 1H), 6.76 (s, 1H), 3.68 (s, 3H), 3.46 (s, 2H), 1.61 (s, 6H).

$^{13}C$  NMR (150 MHz,  $CDCl_3$ ):  $\delta$  200.4, 138.6, 137.9, 132.5, 128.3, 128.2, 126.1, 125.4, 123.4, 121.3, 121.0, 118.6, 109.7, 49.6, 34.9, 32.7, 28.8.

HRMS (ESI): Calcd for  $C_{20}H_{21}NONa$   $[M+Na]^+$ : 314.1515; found: 314.1517.

## VI. Mechanistic studies

Table S6. Control experiments

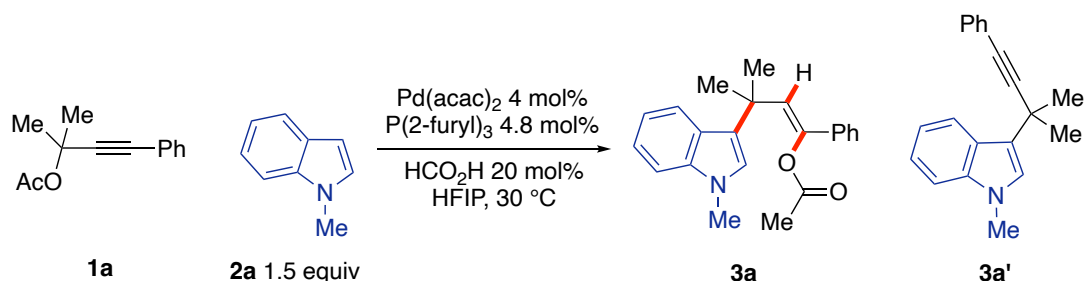

| entry | variations from standard conditions                | conversion of <b>1a</b> | yield of <b>3a</b> | yield of <b>3a'</b> |
|-------|----------------------------------------------------|-------------------------|--------------------|---------------------|
| 1     | none                                               | 100%                    | 86%                | 0%                  |
| 2     | without palladium catalyst                         | 100%                    | 0%                 | 49%                 |
| 3     | without phosphine ligand                           | 100%                    | 25%                | 30%                 |
| 4     | without $HCO_2H$                                   | 100%                    | 54%                | 20%                 |
| 5     | without $Pd(acac)_2$ and $P(2-furyl)_3$            | 100%                    | 0%                 | 56%                 |
| 6     | without $Pd(acac)_2$ , $P(2-furyl)_3$ and $HCO_2H$ | 100%                    | 0%                 | 58%                 |

### 1-Methyl-3-(2-methyl-4-phenylbut-3-yn-2-yl)-1H-indole (**3a'**) [1084888-36-7]<sup>7</sup>

$^1\text{H NMR}$  (600 MHz,  $\text{CDCl}_3$ ):  $\delta$  8.01 (d,  $J = 7.8$  Hz, 1H), 7.44 (d,  $J = 5.4$  Hz, 2H), 7.32 (d,  $J = 8.3$  Hz, 1H), 7.29-7.24 (m, 4H), 7.14 (t,  $J = 7.5$  Hz, 1H), 7.01 (s, 1H), 3.76 (s, 3H), 1.82 (s, 6H).

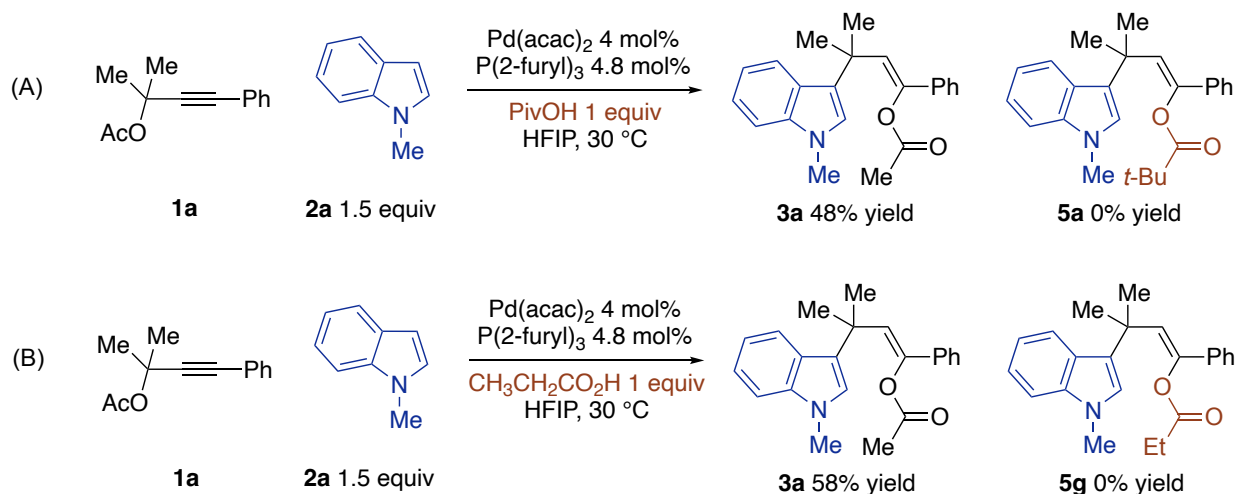

### Scheme S1. Competition study of acyloxylation process

*General procedure of the reaction shown in Scheme S1:* in an argon-filled glovebox,  $\text{Pd(acac)}_2$  (1.2 mg, 0.004 mmol),  $\text{P(2-furyl)}_3$  (1.1 mg, 0.0048 mmol) and 0.1 mL of HFIP were charged into an oven-dried 4-mL vial. After stirring for about 15 minutes at rt, *N*-methylindole (19  $\mu\text{L}$ , 0.15 mmol), carboxylic acid (0.1 mmol) and propargylic acetate **1a** (20.2 mg, 0.1 mmol) were added sequentially to the reaction mixture. The vial was sealed with a screw cap and placed in a heating block maintained at 30  $^\circ\text{C}$ . After stirring for 24 hours, the crude reaction mixture was purified by flash chromatography on silica (ethyl acetate/hexanes 1:60).

Result: The exclusive formation of enol acetate **3a** indicated that acyloxylation of alkynyl moiety on **1a** is an intramolecular process.

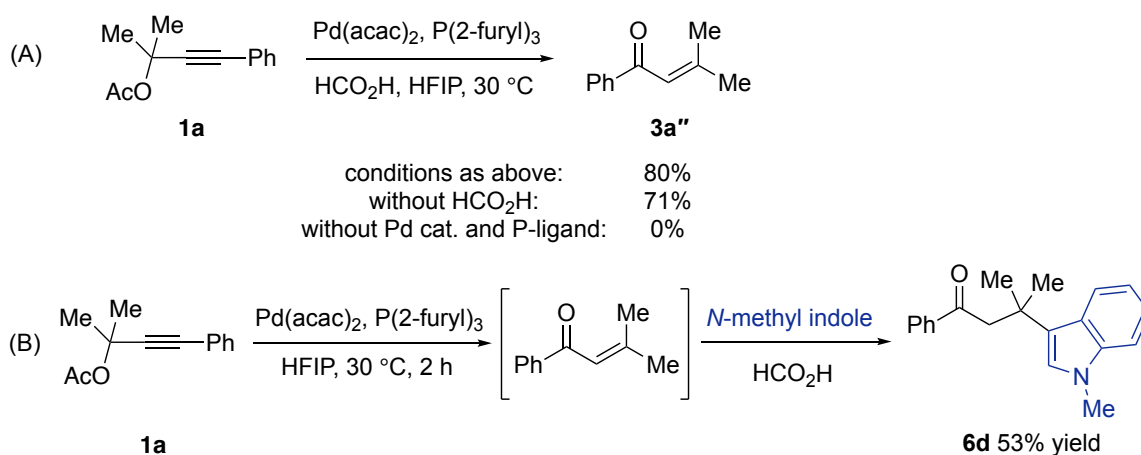

### Scheme S2. Investigation of side-reaction pathways

*General procedure of the reaction shown in Scheme S2-A:* in an argon-filled glovebox,  $\text{Pd(acac)}_2$  (1.2 mg, 0.004 mmol),  $\text{P(2-furyl)}_3$  (1.1 mg, 0.0048 mmol) and 0.1 mL of HFIP were charged into an oven-dried 4-mL vial. After stirring for about 15 minutes at rt, formic acid (0.8  $\mu\text{L}$ , 0.02 mmol) and propargylic acetate **1a** (20.2 mg, 0.1 mmol) were added sequentially to the reaction mixture. The vial was sealed with a screw cap and placed in a

heating block maintained at 30 °C. After stirring for two hours, aliquots from the reaction mixture were evaluated by GC-MS. The crude product was then purified by flash chromatography on silica (ethyl acetate/hexanes 1:10), affording **3a''** in 80% yield as yellow oil. For a control experiment without palladium catalyst and phosphine ligand, no enone product (**3a''**) was detected based on the crude <sup>1</sup>H-NMR.

### 3-Methyl-1-phenylbut-2-en-1-one (**3a''**) [5650-07-7]<sup>8</sup>

<sup>1</sup>H NMR (600 MHz, CDCl<sub>3</sub>): δ 7.94-7.92 (m, 2H), 7.53-7.50 (m, 1H), 7.46-7.43 (m, 2H), 6.75 (hept, *J* = 1.3 Hz, 1H), 2.21 (s, 3H), 2.02 (s, 3H).

*General procedure of the reaction shown in Scheme S2-B:* in an argon-filled glovebox, Pd(acac)<sub>2</sub> (1.2 mg, 0.004 mmol), P(2-furyl)<sub>3</sub> (1.1 mg, 0.0048 mmol) and 0.1 mL of HFIP were charged into an oven-dried 4-mL vial. After stirring for about 15 minutes at rt, propargylic acetate **1a** (20.2 mg, 0.1 mmol) was added, and the resulting solution stirred at 30 °C for 2 h. Afterwards, *N*-methylindole (19 μL, 0.15 mmol) and formic acid (0.8 μL, 0.02 mmol) were added sequentially. The vial was sealed with a screw cap and placed in a heating block maintained at 30 °C. After stirring for 24 hours, the crude reaction mixture was purified by flash chromatography on silica (ethyl acetate/hexanes 1:60), affording **6d** in 53% yield as colorless oil.

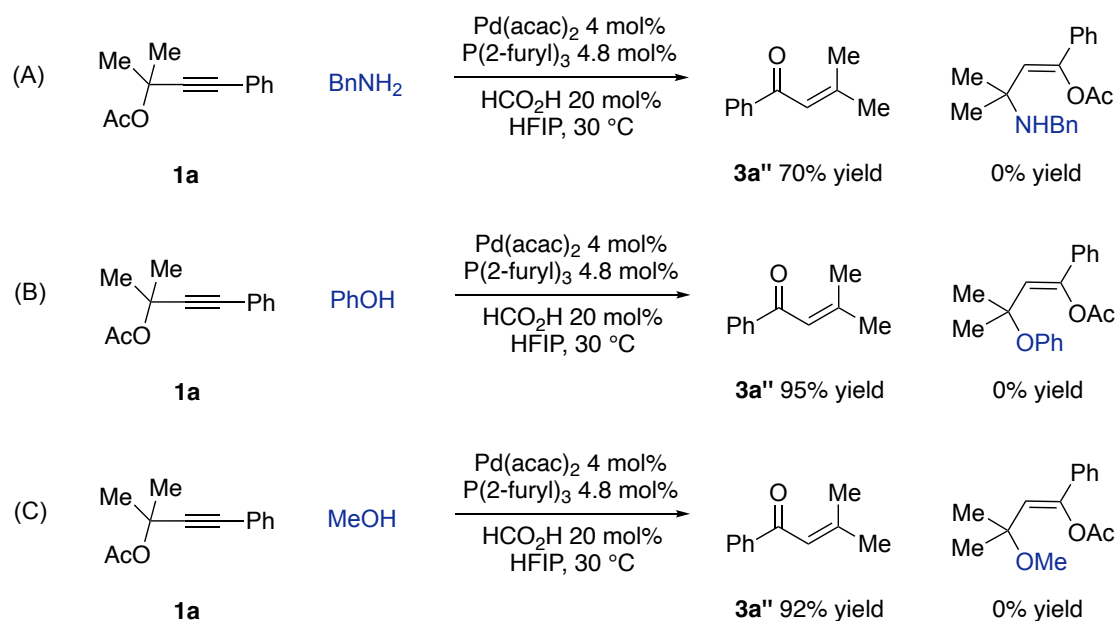

**Scheme S3.** The reactivity of propargylic acetate **1a** with other nucleophiles under the standard conditions

*General procedure of the reaction shown in Scheme S3:* in an argon-filled glovebox, Pd(acac)<sub>2</sub> (1.2 mg, 0.004 mmol), P(2-furyl)<sub>3</sub> (1.1 mg, 0.0048 mmol) and 0.1 mL of HFIP were charged into an oven-dried 4-mL vial. After stirring for about 15 minutes at rt, nucleophile (0.15 mmol), formic acid (0.8 μL, 0.02 mmol) and propargylic acetate **1a** (20.2 mg, 0.1 mmol) were added sequentially to the reaction mixture. The vial was sealed with a screw cap and placed in a heating block maintained at 30 °C. After stirring for 24 hours, the crude reaction mixture was purified by flash chromatography on silica (ethyl acetate/hexanes 1:60).

## VII. X-ray crystallographic data

Deposition number CCDC 2221866

ORTEP of **4a**, thermal ellipsoids are shown at 50% probability.

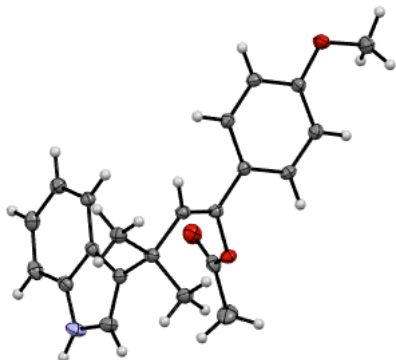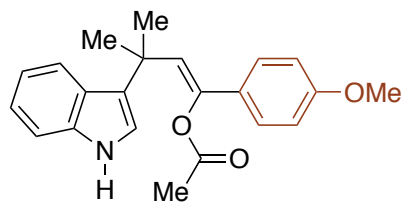

Bond precision: C-C = 0.0029 Å

Wavelength=0.71073

Cell: a=7.9756 (3)  
alpha=90

b=11.0244 (4)  
beta=90

c=20.3840 (8)  
gamma=90

Temperature: 100 K

|                        | Calculated   | Reported     |
|------------------------|--------------|--------------|
| Volume                 | 1792.29 (12) | 1792.29 (12) |
| Space group            | P 21 21 21   | P 21 21 21   |
| Hall group             | P 2ac 2ab    | P 2ac 2ab    |
| Moiety formula         | C22 H23 N O3 | ?            |
| Sum formula            | C22 H23 N O3 | C22 H23 N O3 |
| Mr                     | 349.41       | 349.41       |
| Dx, g cm <sup>-3</sup> | 1.295        | 1.295        |
| Z                      | 4            | 4            |
| Mu (mm <sup>-1</sup> ) | 0.086        | 0.086        |
| F000                   | 744.0        | 744.0        |
| F000'                  | 744.34       |              |
| h, k, lmax             | 11, 15, 29   | 11, 15, 29   |
| Nref                   | 5726 [ 3241] | 5707         |
| Tmin, Tmax             | 0.976, 0.981 | 0.820, 0.980 |
| Tmin'                  | 0.976        |              |

Correction method= # Reported T Limits: Tmin=0.820 Tmax=0.980  
AbsCorr = MULTI-SCAN

Data completeness= 1.76/1.00

Theta(max)= 31.020

R(reflections)= 0.0467 ( 4383)

wR2(reflections)=  
0.1082 ( 5707)

S = 1.047

Npar= 239



## VIII. Reference

- (1) Jiao, Z.; Shi, Q.; Zhou, J. S. Asymmetric Intermolecular Heck Reaction of Propargylic Acetates and Cycloalkenes to Access Fused Cyclobutenes. *Angew. Chem. Int. Ed.* **2017**, *56*, 14567-14571.
- (2) Lu, Q.; Liu, K.; Zhang, H.; Du, Z.; Wang, X.; Wang, F. From Tunneling to Hopping: A Comprehensive Investigation of Charge Transport Mechanism in Molecular Junctions Based on Oligo(p-phenylene ethynylene)s. *ACS Nano* **2009**, *3*, 3861-3868.
- (3) Manoni, E.; Daka, M.; Mastandrea, M. M.; Nisi, A. D.; Monari, M.; Bandini, M. Catalytic  $\alpha$ -Allylation of Enones with Alcohols via [Gold(I)]-Mediated [3,3]-Sigmatropic Rearrangement of Propargylic Carboxylates. *Adv. Synth. Catal.* **2016**, *358*, 1404-1409.
- (4) Okamoto, N.; Sueda, T.; Minami, H.; Miwa, Y.; Yanada, R. Regioselective Iodoazidation of Alkynes: Synthesis of  $\alpha,\alpha$ -Diazidoketones. *Org. Lett.* **2015**, *17*, 1336-1339.
- (5) Dudhe, P.; Krishnan, M. A.; Yadav, K.; Roy, D.; Venkatasubbaiah, K.; Pathak, B.; Chelvam, V. Synthesis of 1-Indolyl-3,5,8-substituted  $\gamma$ -carboline: One-Pot Solvent-Free Protocol and Biological Evaluation. *Beilstein J. Org. Chem.* **2021**, *17*, 1453-1463.
- (6) Sun, C.-L.; Wang, Y.; Zhou, X.; Wu, Z.-H.; Li, B.-J.; Guan, B.-T.; Shi, Z.-J. Construction of Polysubstituted Olefins through Ni-Catalyzed Direct Activation of Alkenyl C–O of Substituted Alkenyl Acetates. *Chem. Eur. J.* **2010**, *16*, 5844-5847.
- (7) Sanz, R.; Miguel, D.; Martínez, A.; Gohain, M.; García-García, P.; Fernández-Rodríguez, M. A.; Álvarez, E.; Rodríguez, F. Brønsted Acid Catalyzed Alkylation of Indoles with Tertiary Propargylic Alcohols: Scope and Limitations. *Euro. J. Org. Chem.* **2010**, *2010*, 7027-7039.
- (8) Bermejo-López, A.; Kong, W.-J.; Tortajada, P. J.; Posevins, D.; Martín-Matute, B.; Bäckvall, J.-E. Iron-Catalyzed Borylation of Propargylic Acetates for the Synthesis of Multisubstituted Allenylboronates. *Chem. Eur. J.* **2023**, *29*, e202203130.

## IX. NMR spectra

TSH-N5-301 AV400 1H

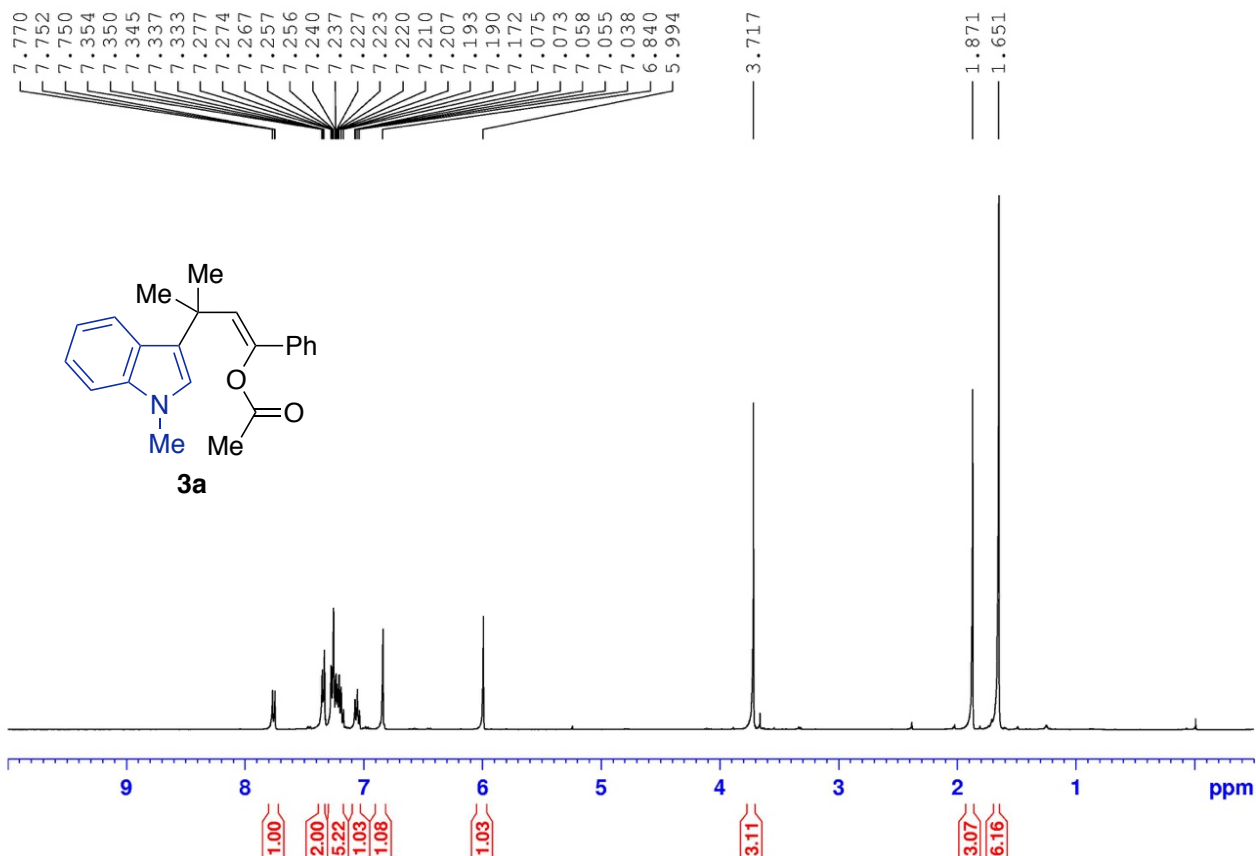

TSH-N5-301 AV400 13C

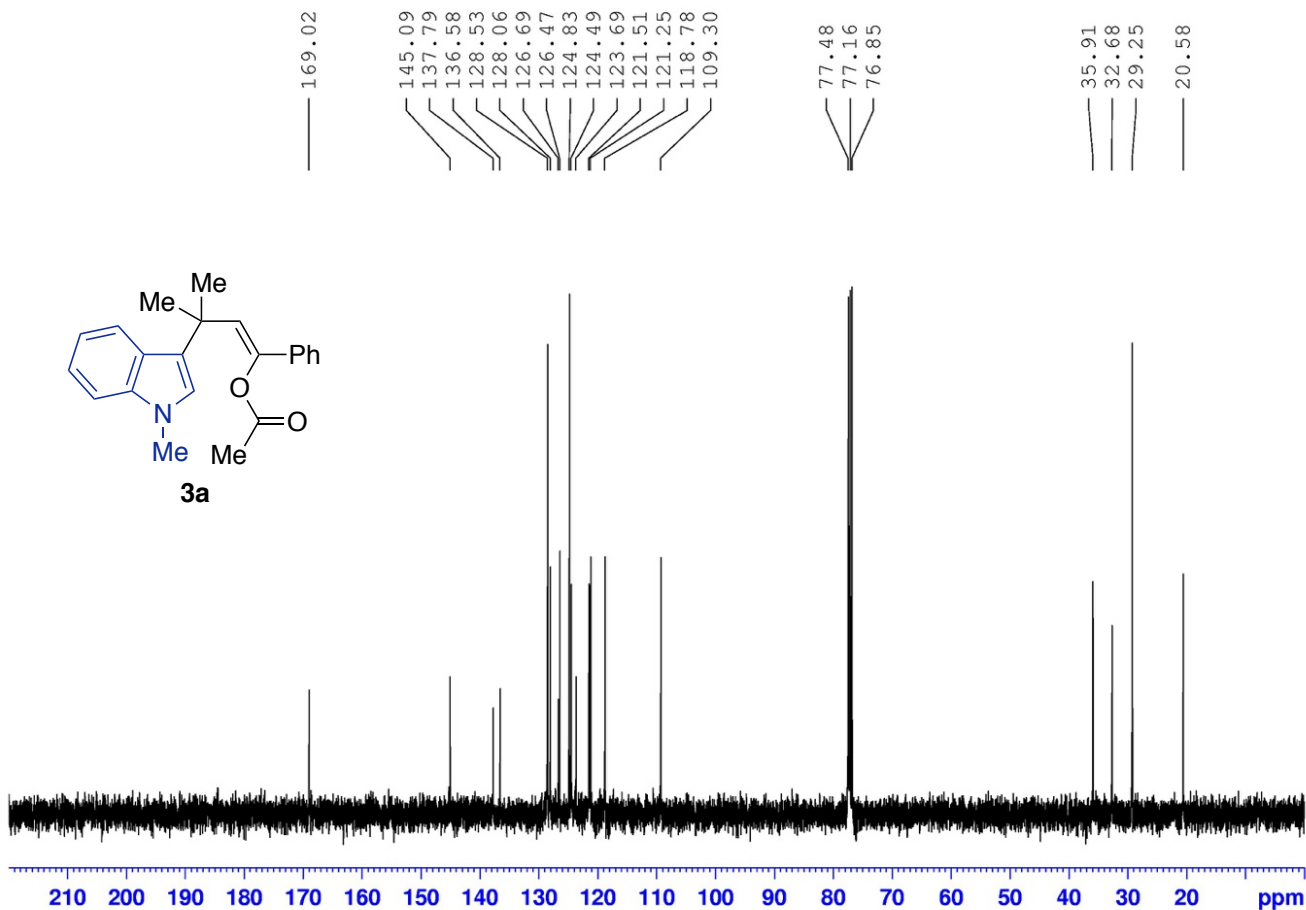

TSH-N6-75-8 1H

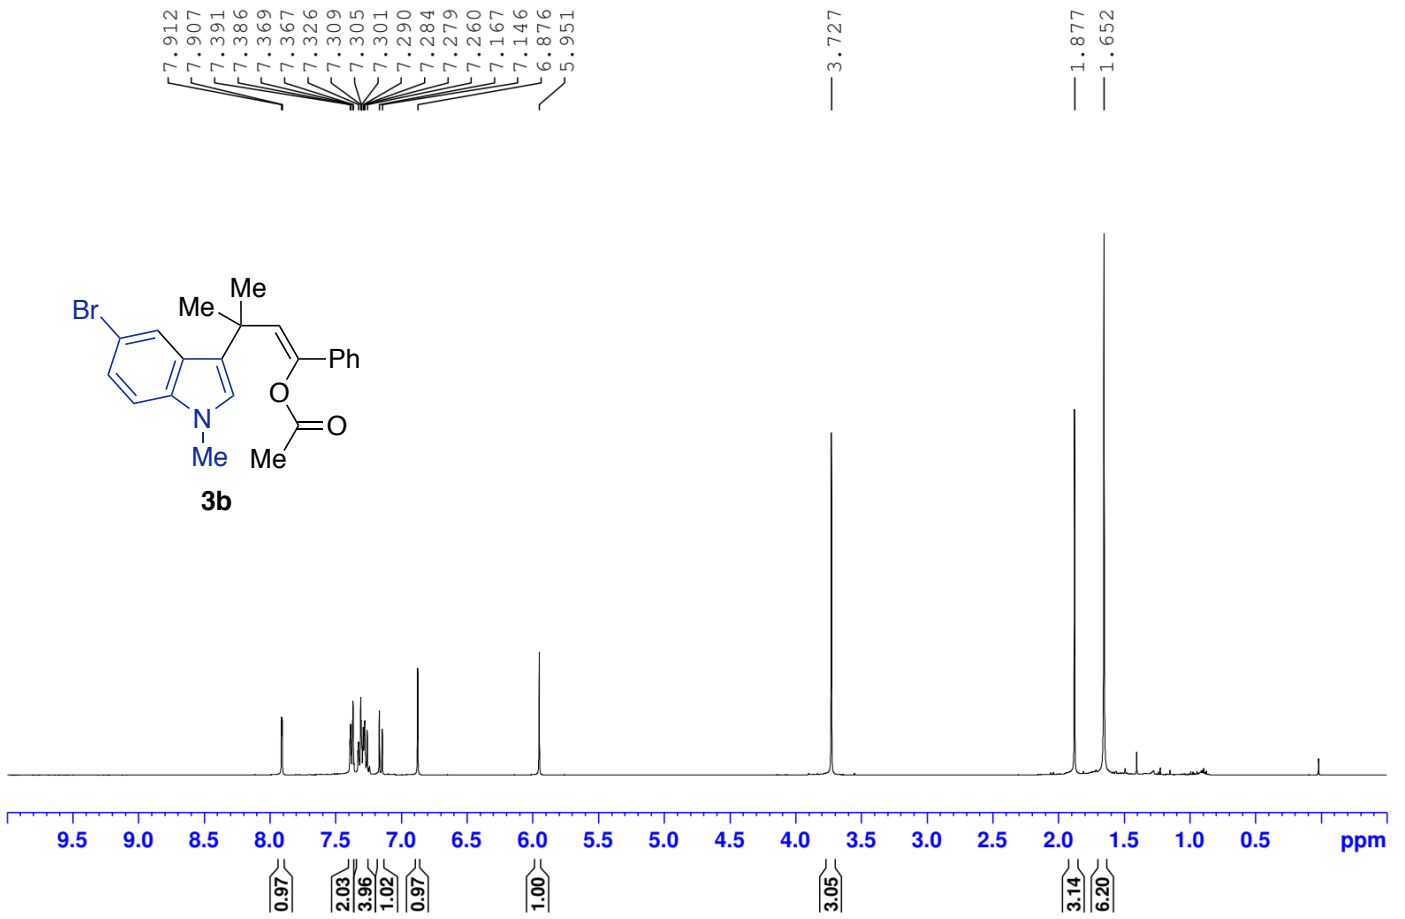

TSH-N6-75-8 13C

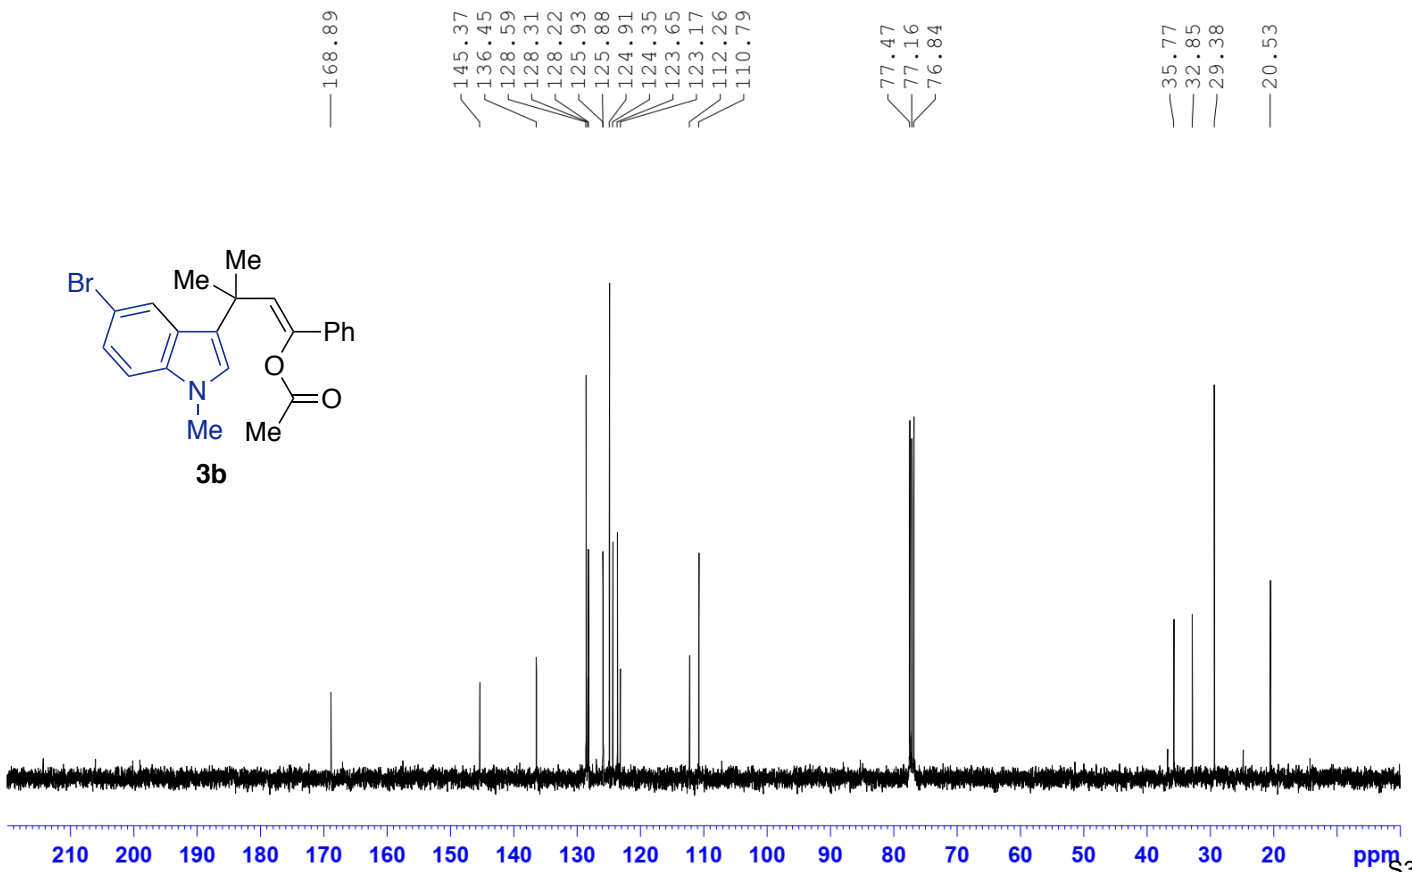

TSH-N5-59-6 1H

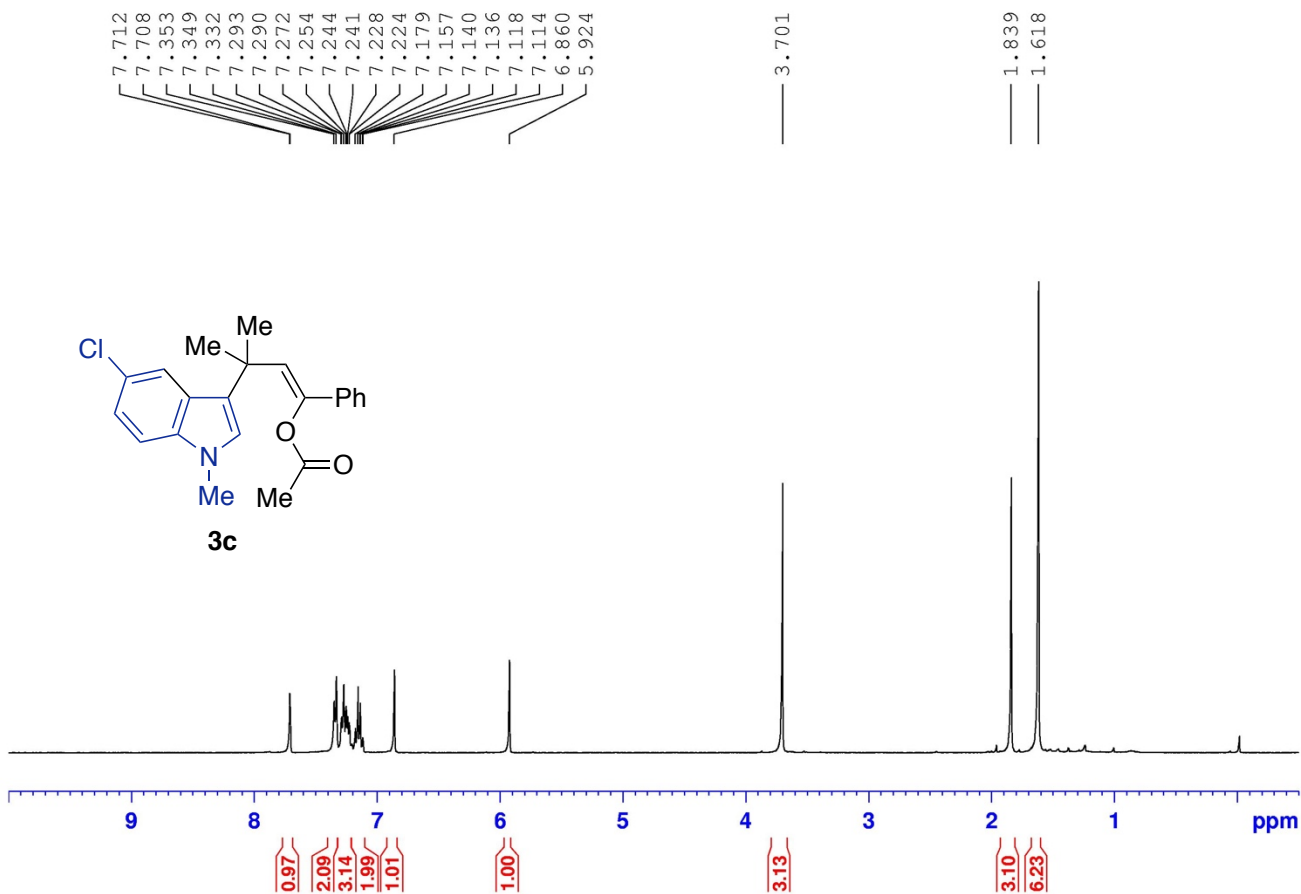

TSH-N5-59-6 13C

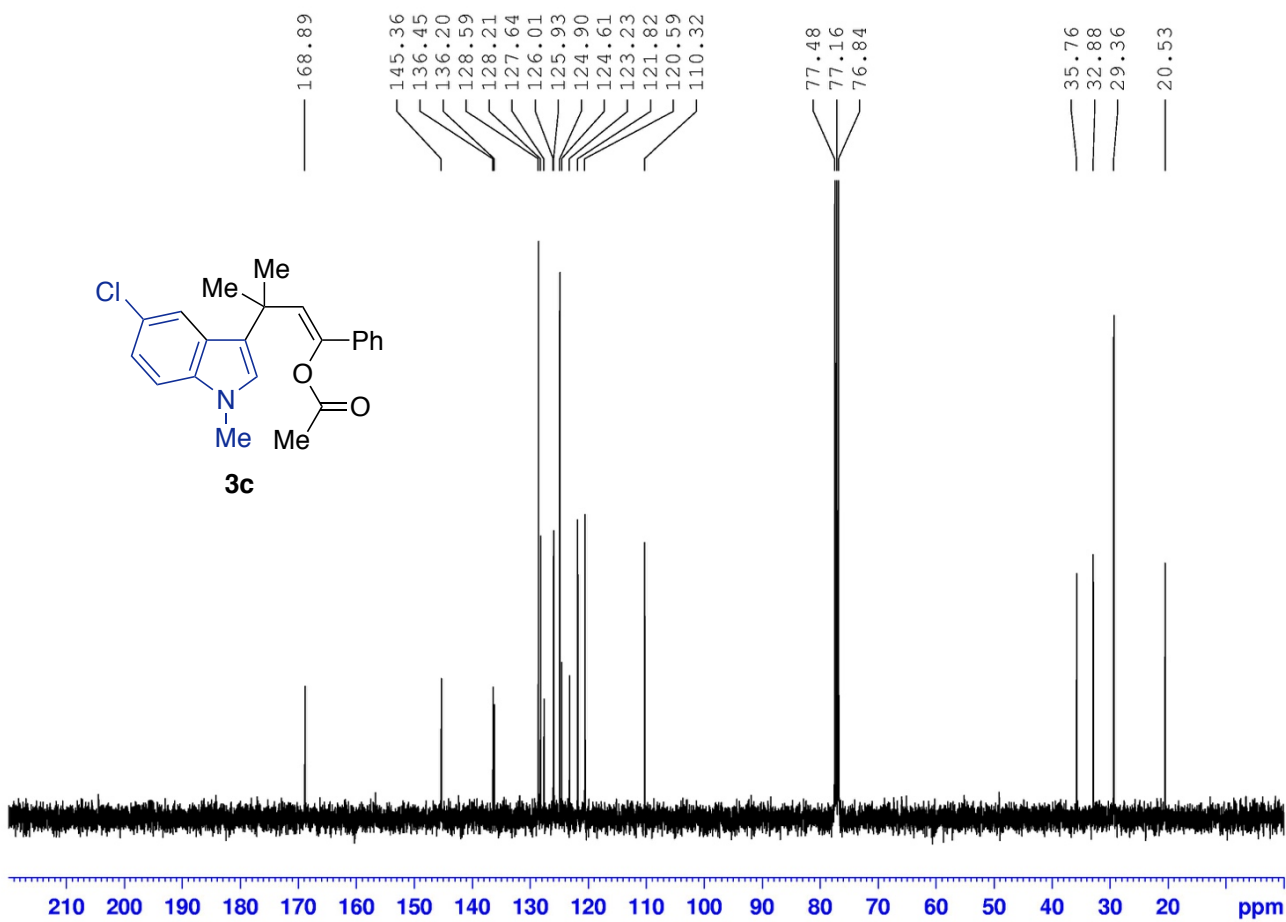

TSH-N5-73-4 1H

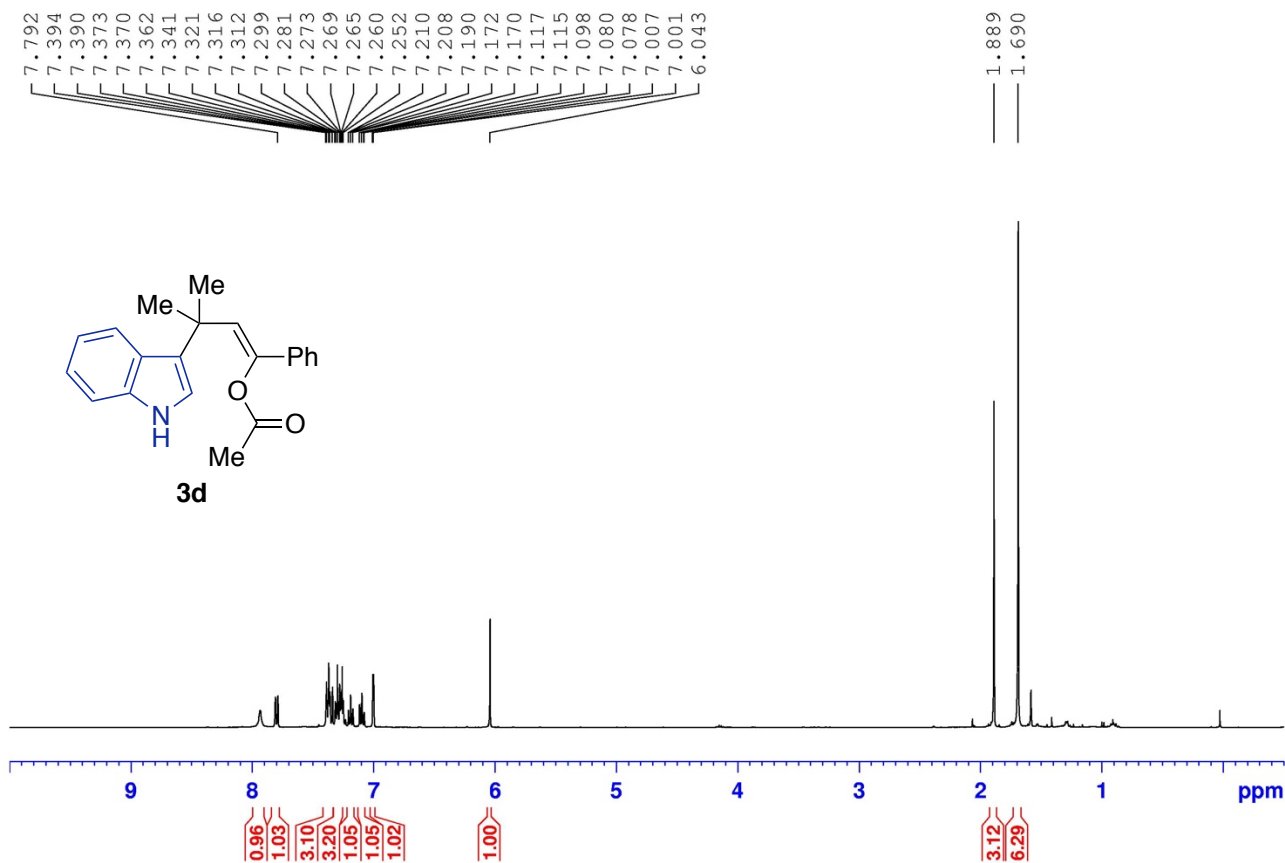

TSH-N5-73-4 13C

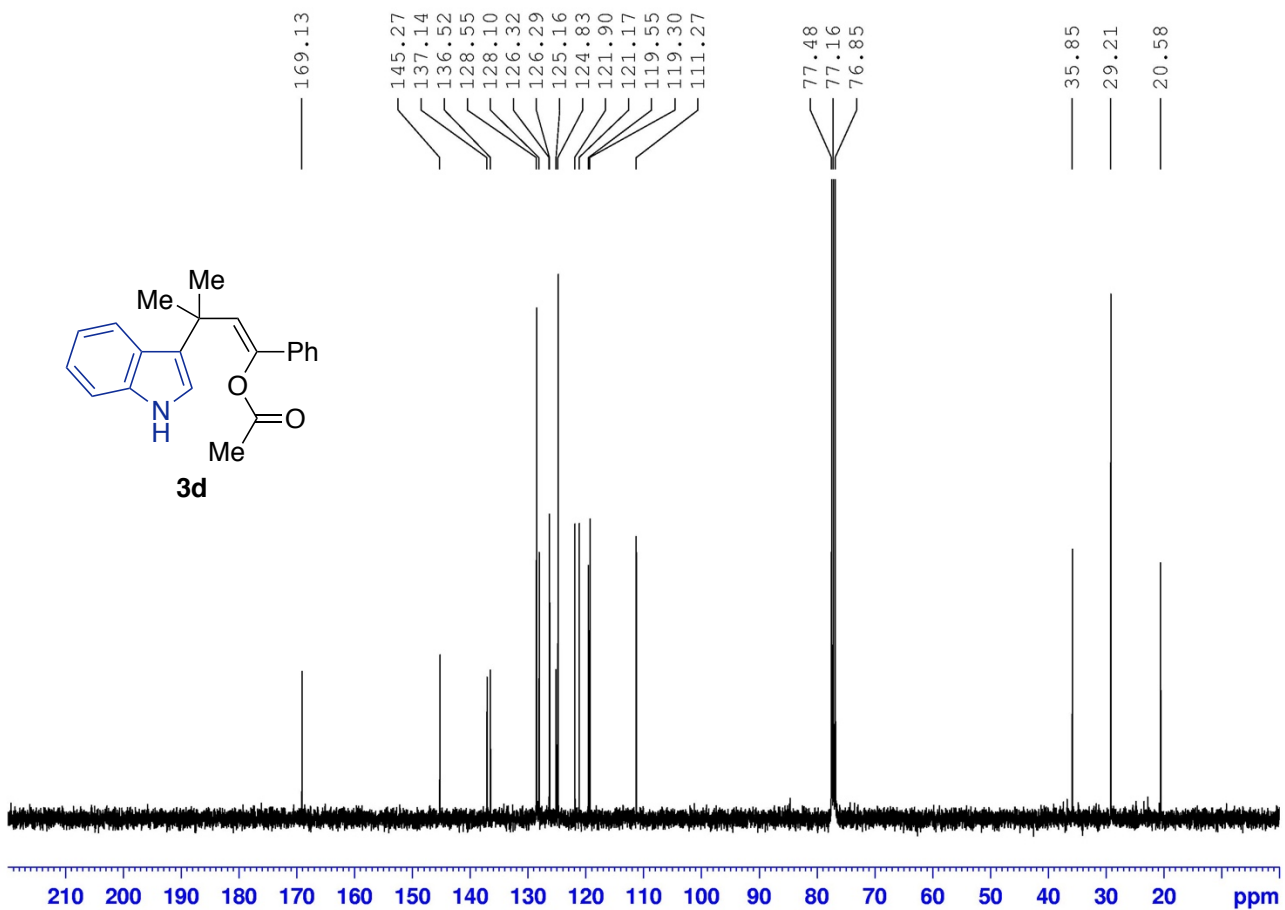

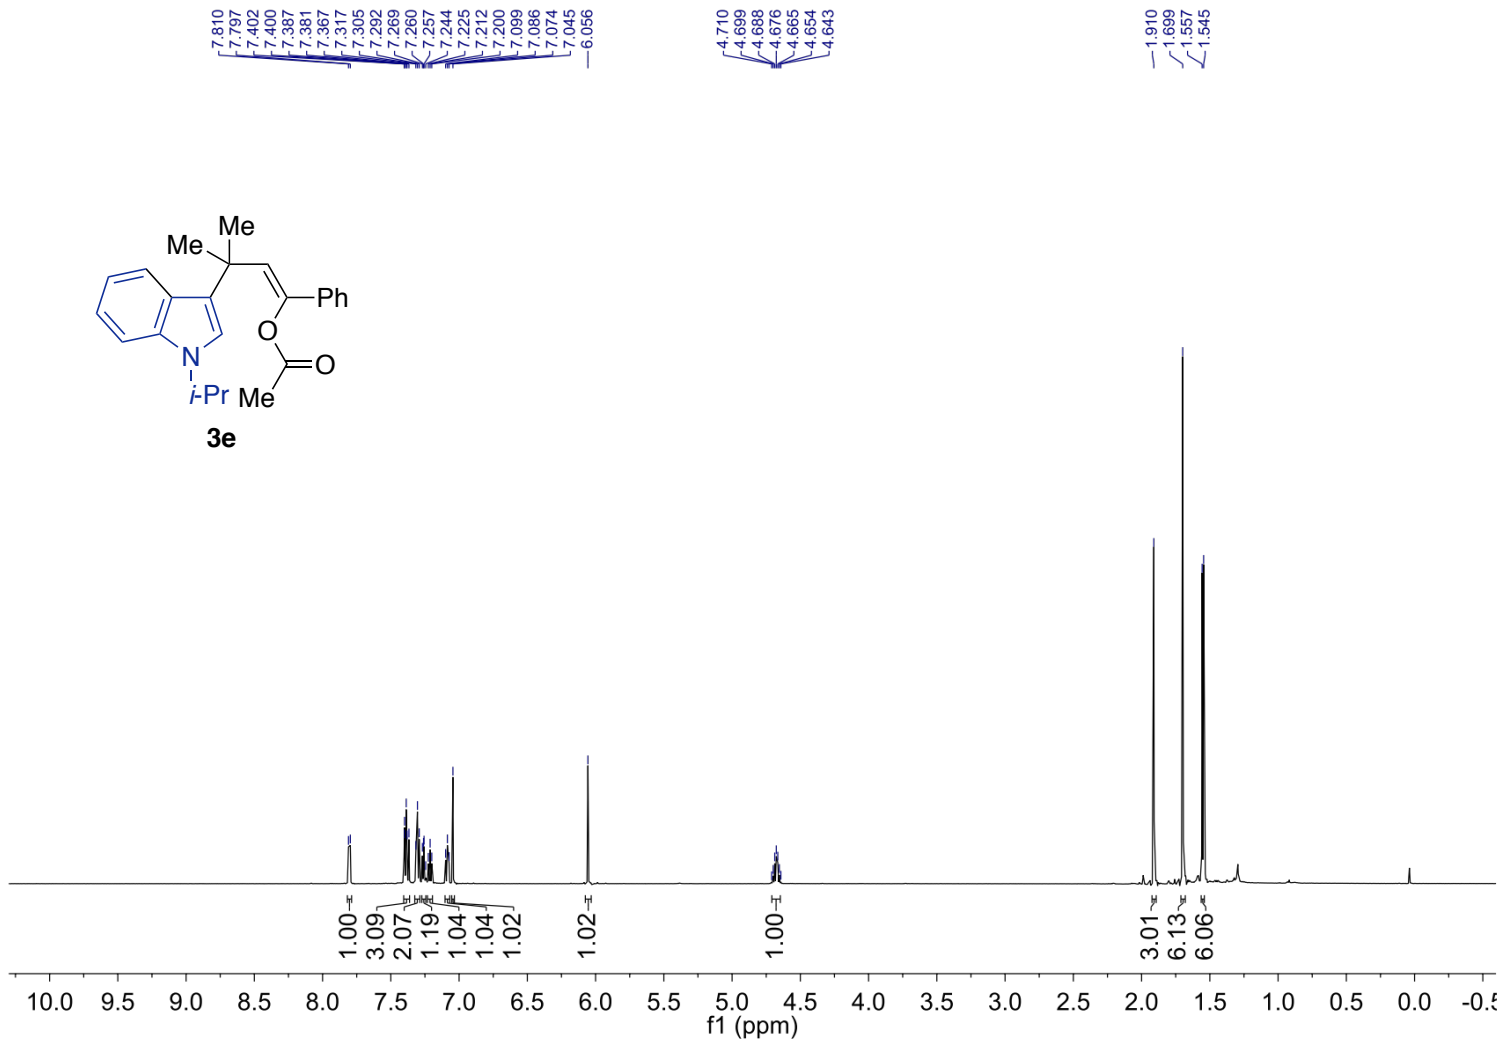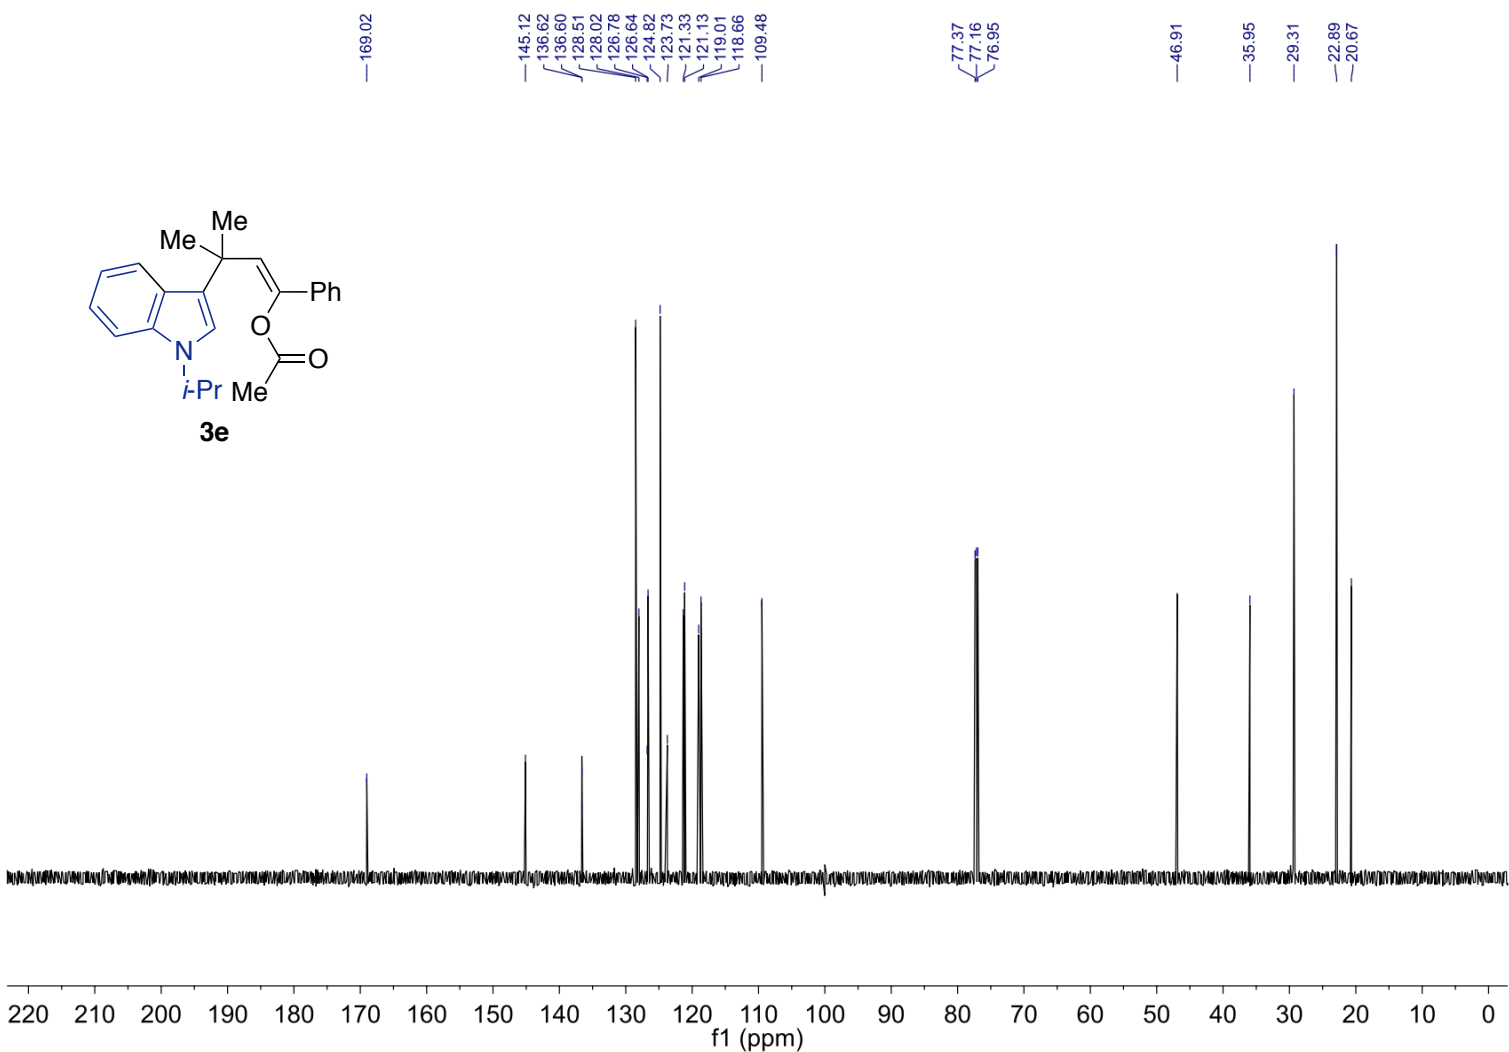

TSH-N6-87-10 1H

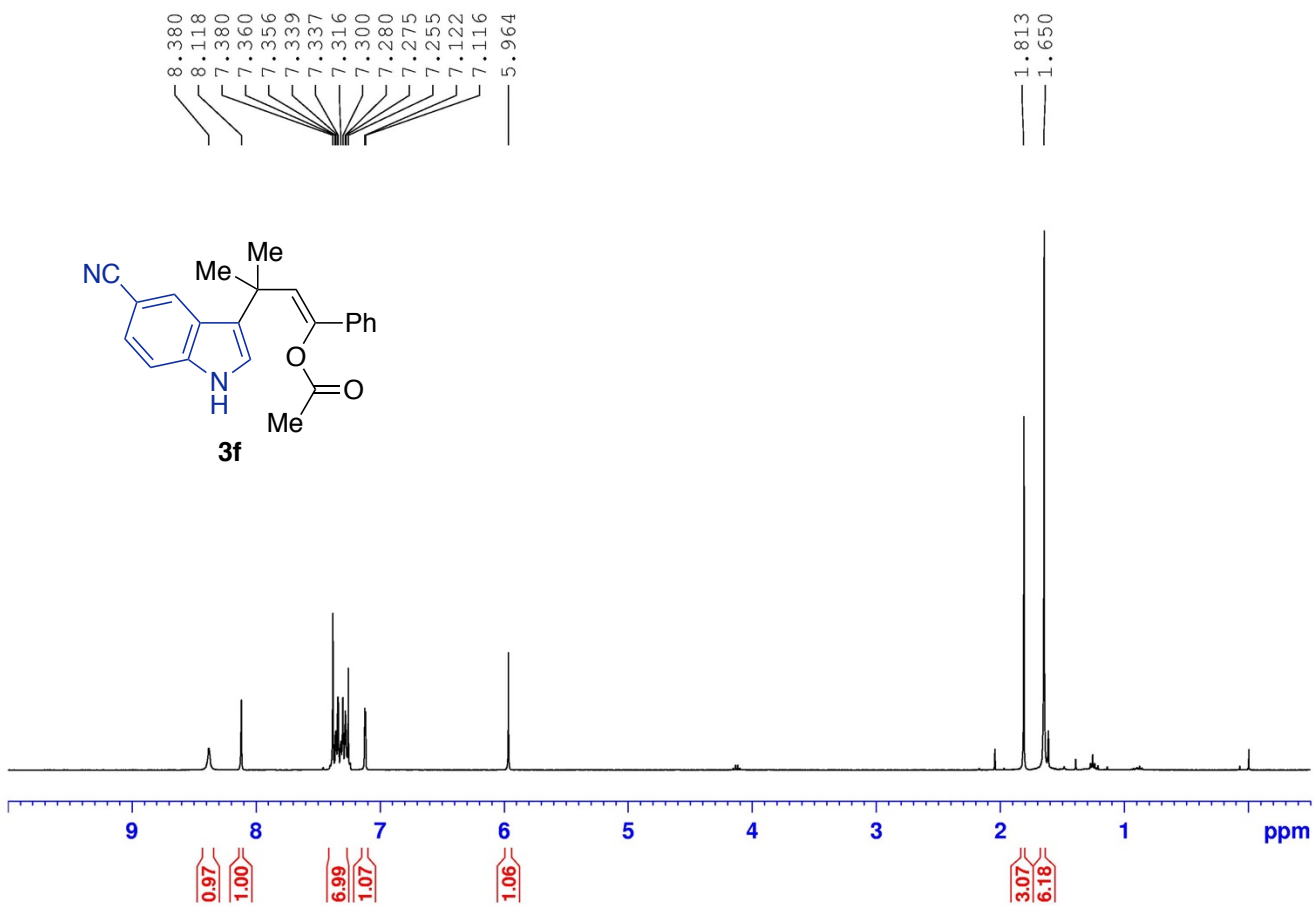

TSH-N6-87-10 13C

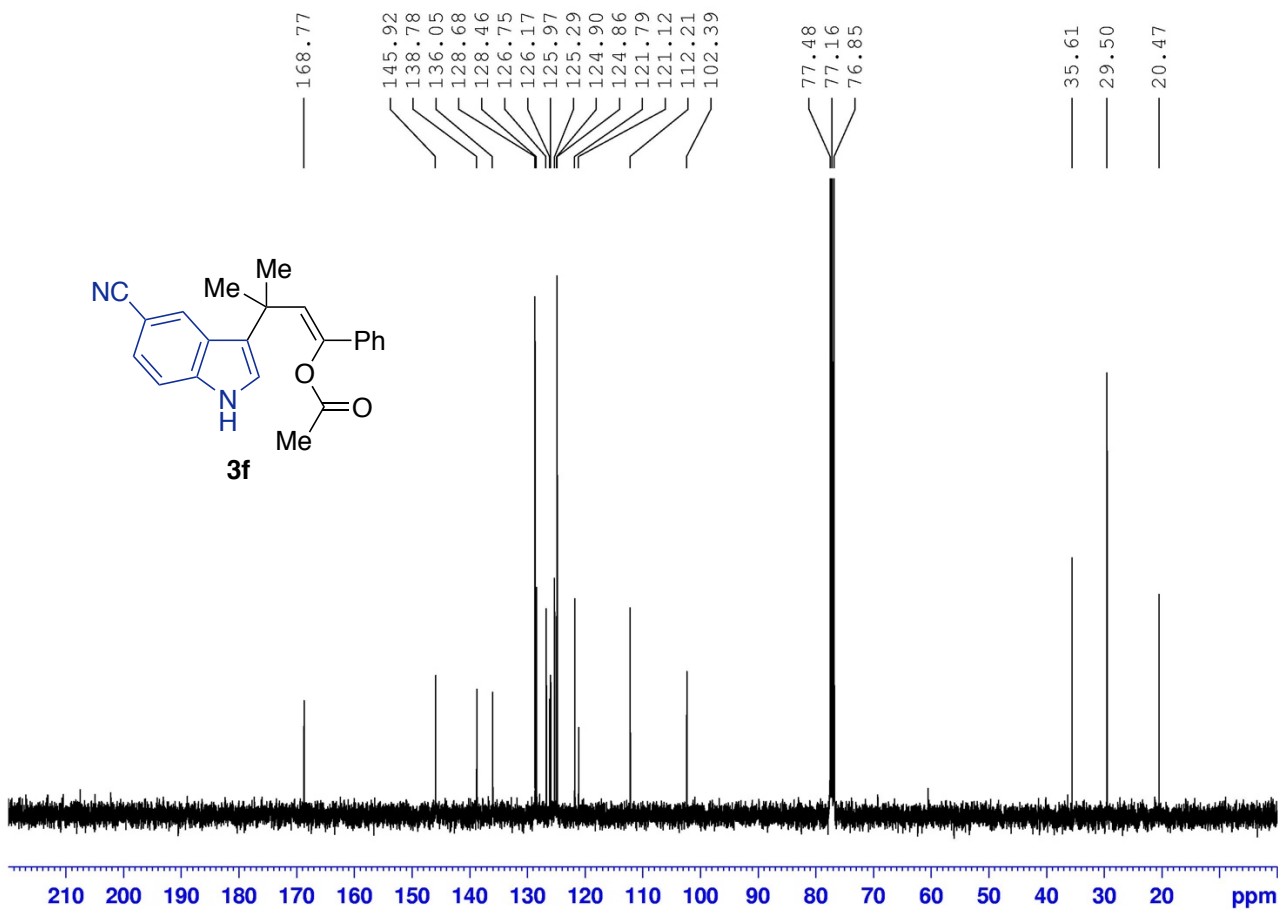



TSH-N6-83-6 1H

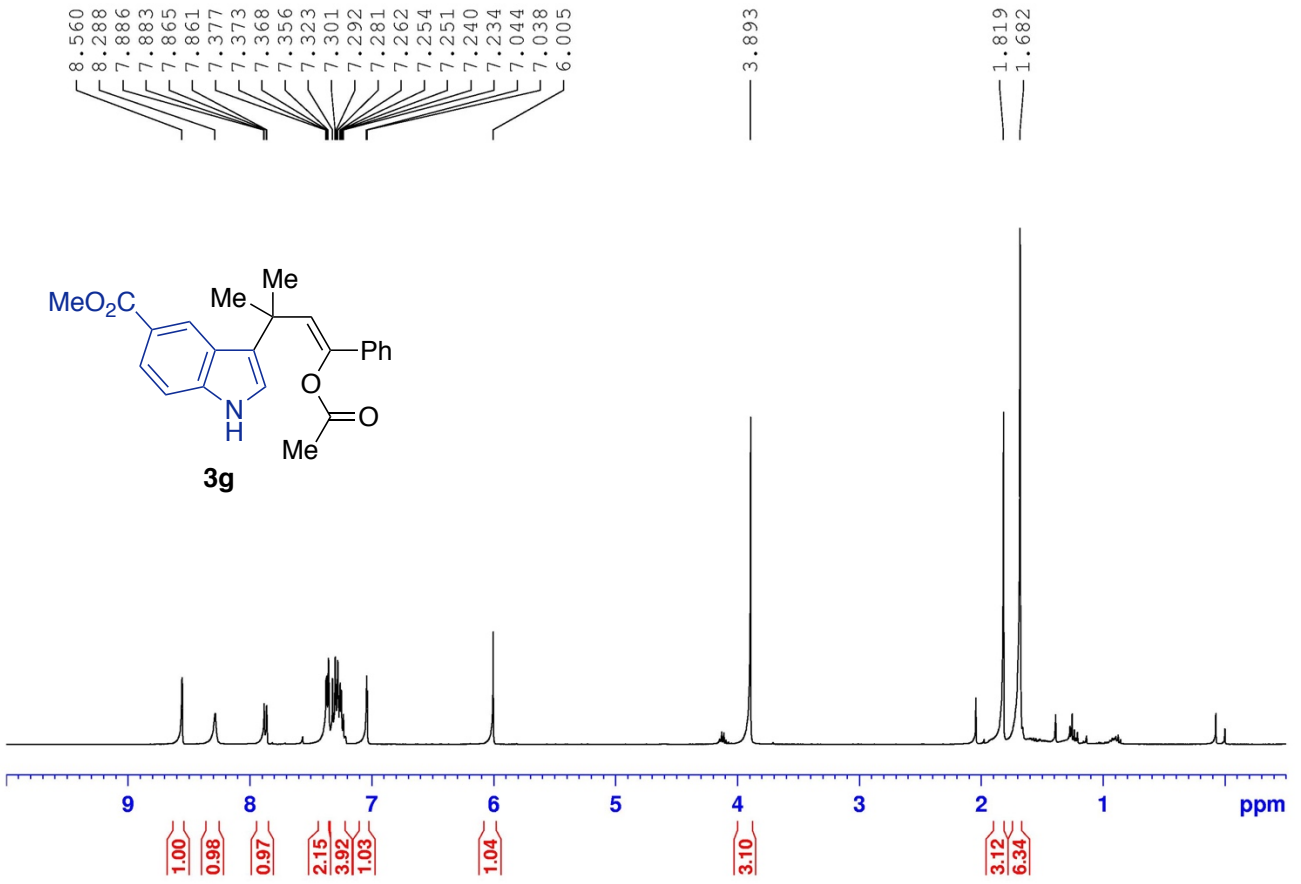

TSH-N6-83-6 13C

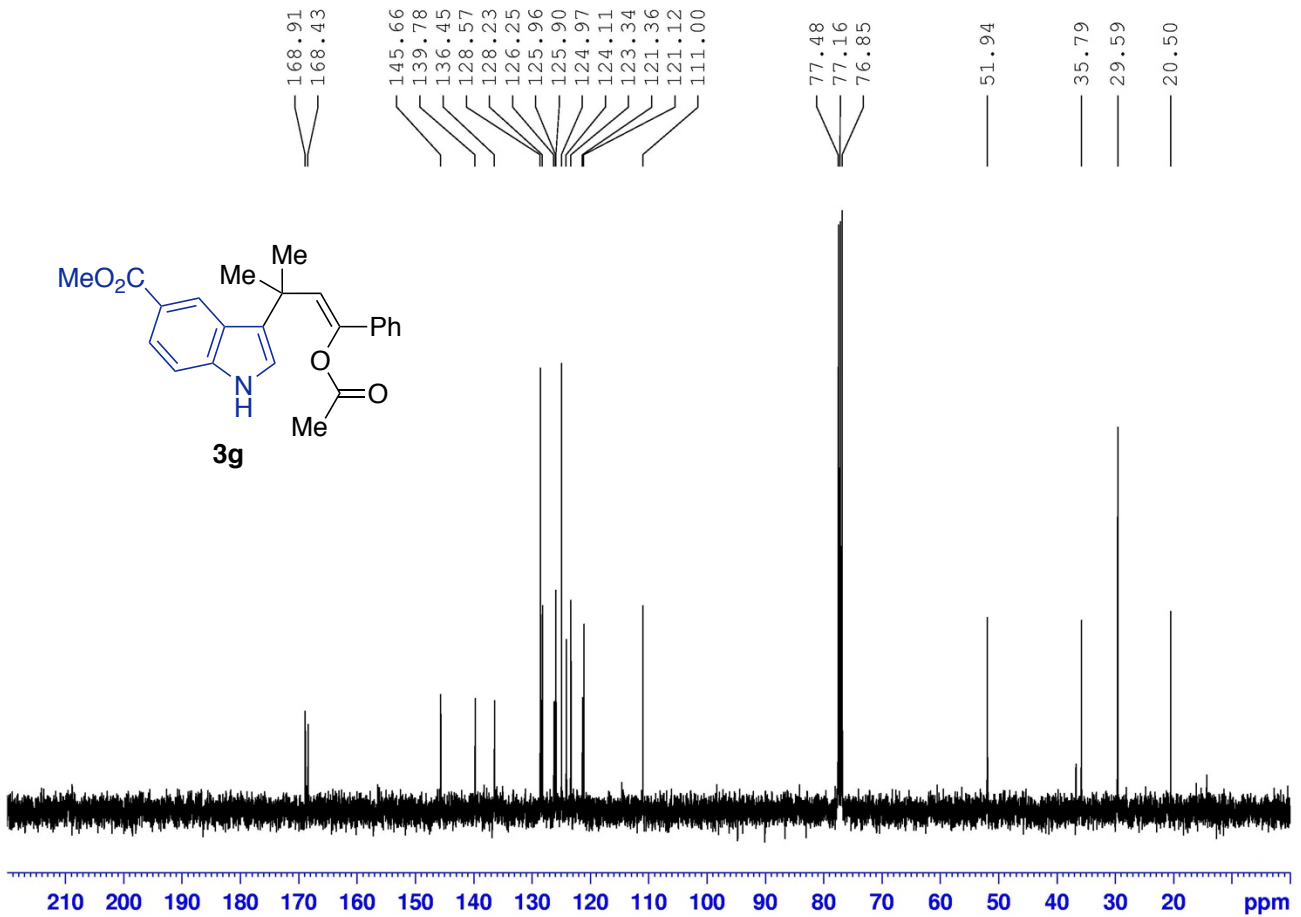

8.198  
8.121  
7.416  
7.402  
7.389  
7.374  
7.362  
7.314  
7.302  
7.289  
7.271  
7.260  
7.247  
7.094  
7.091  
5.948

1.860  
1.684

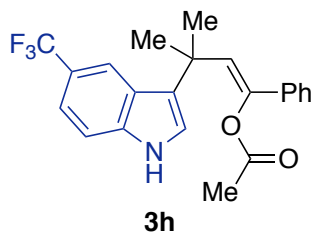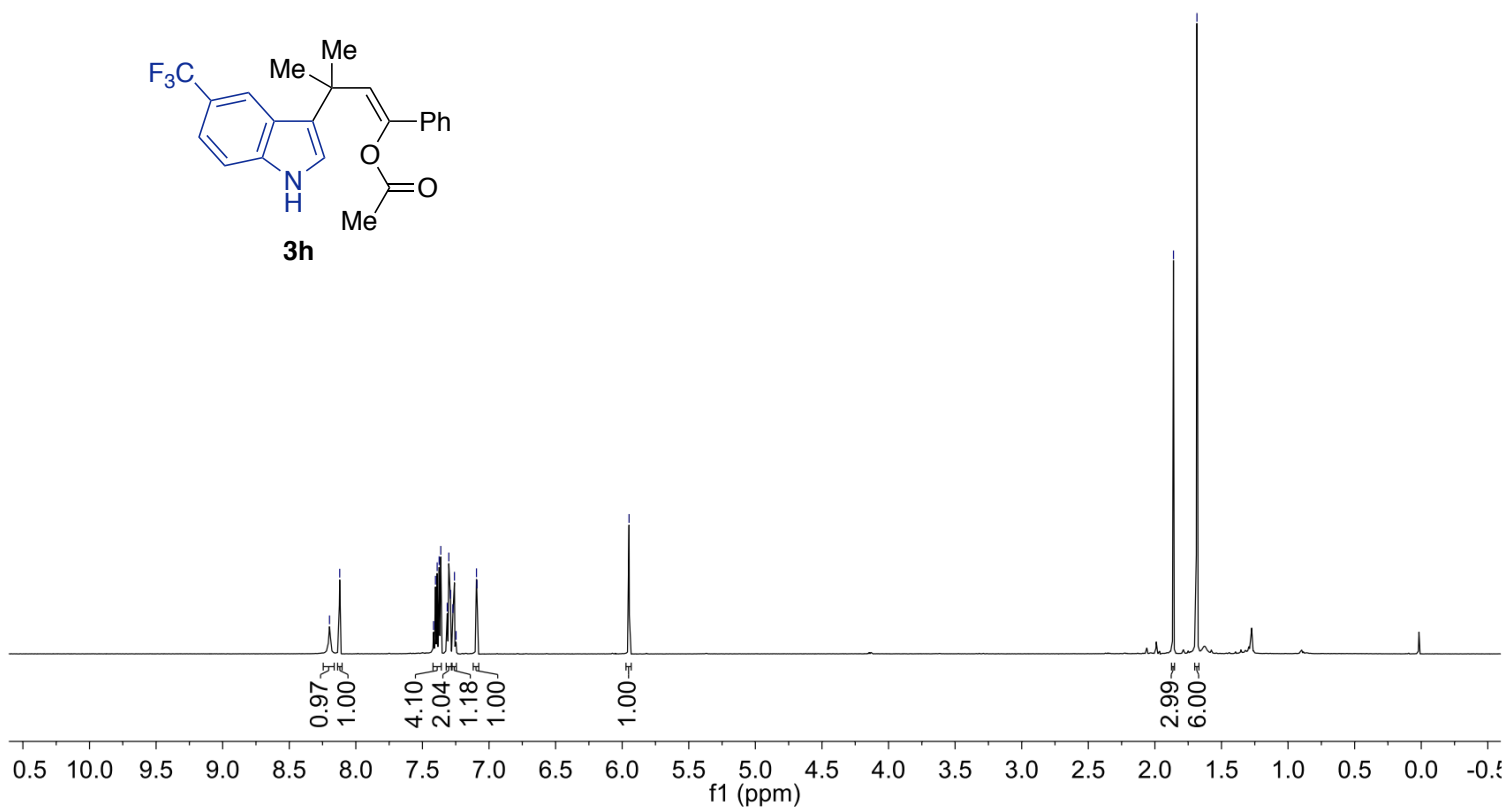

168.98  
145.71  
138.46  
138.45  
136.49  
128.61  
128.31  
128.23  
126.45  
125.92  
125.80  
125.68  
124.97  
124.65  
122.85  
122.00  
121.79  
121.58  
121.38  
121.37  
118.81  
118.79  
118.76  
118.73  
118.71  
118.69  
118.67  
111.53  
77.37  
77.16  
76.95  
35.79  
29.43  
20.53

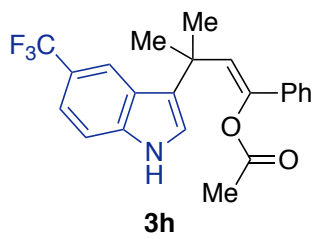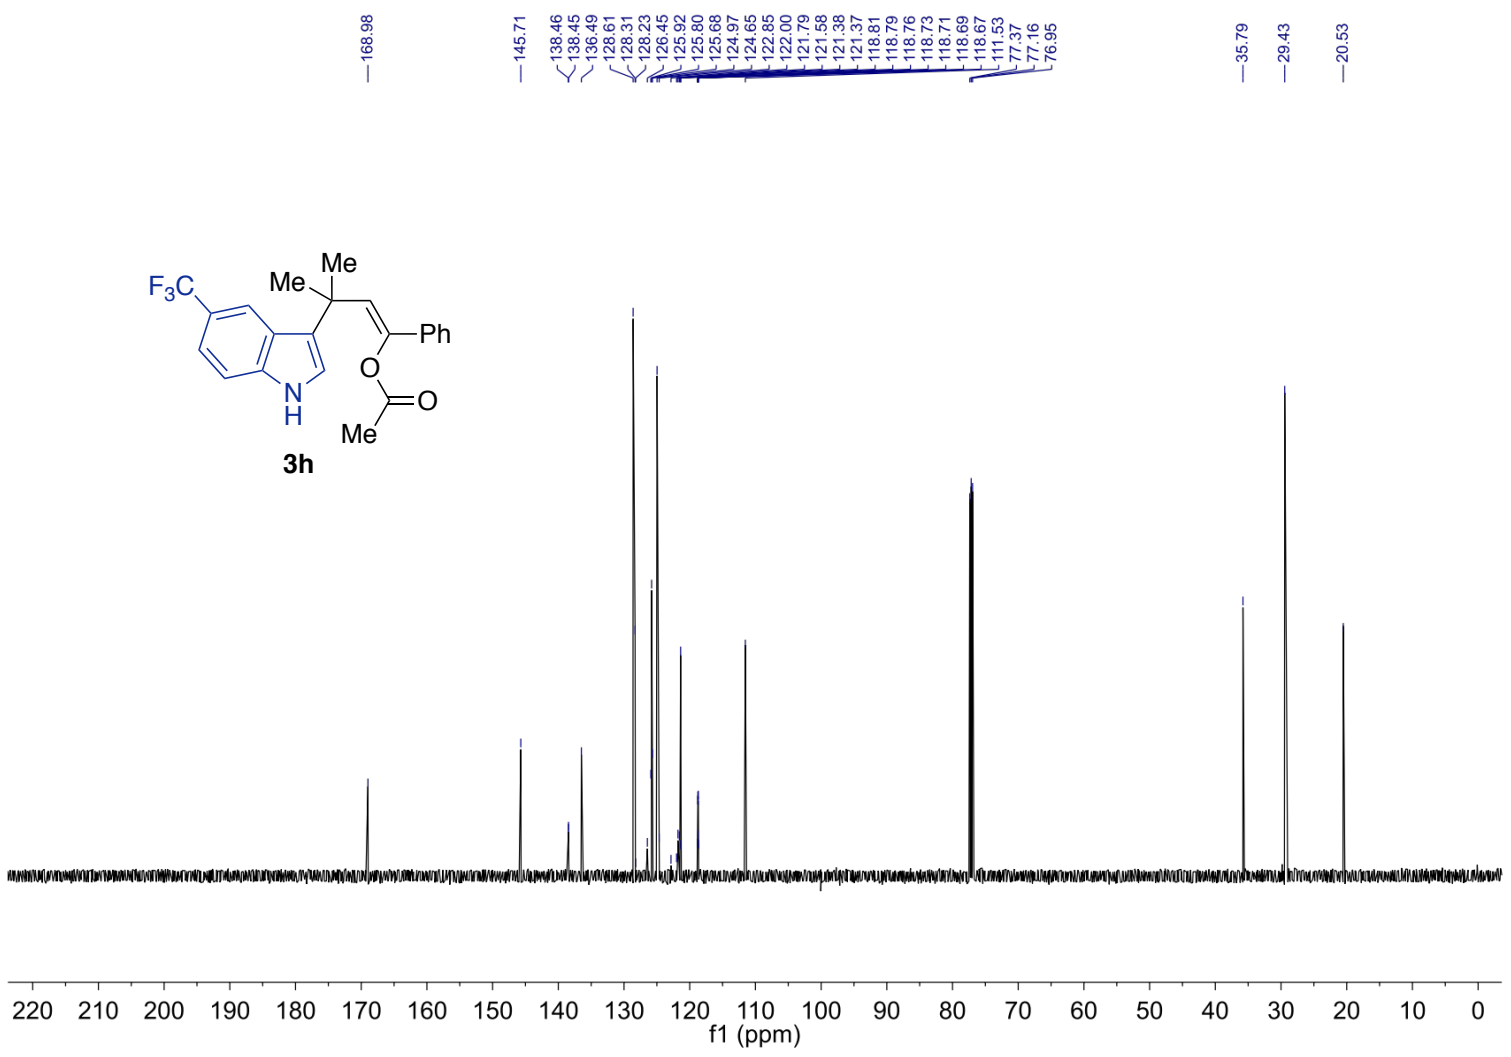

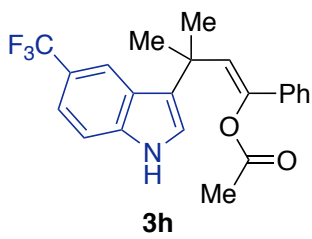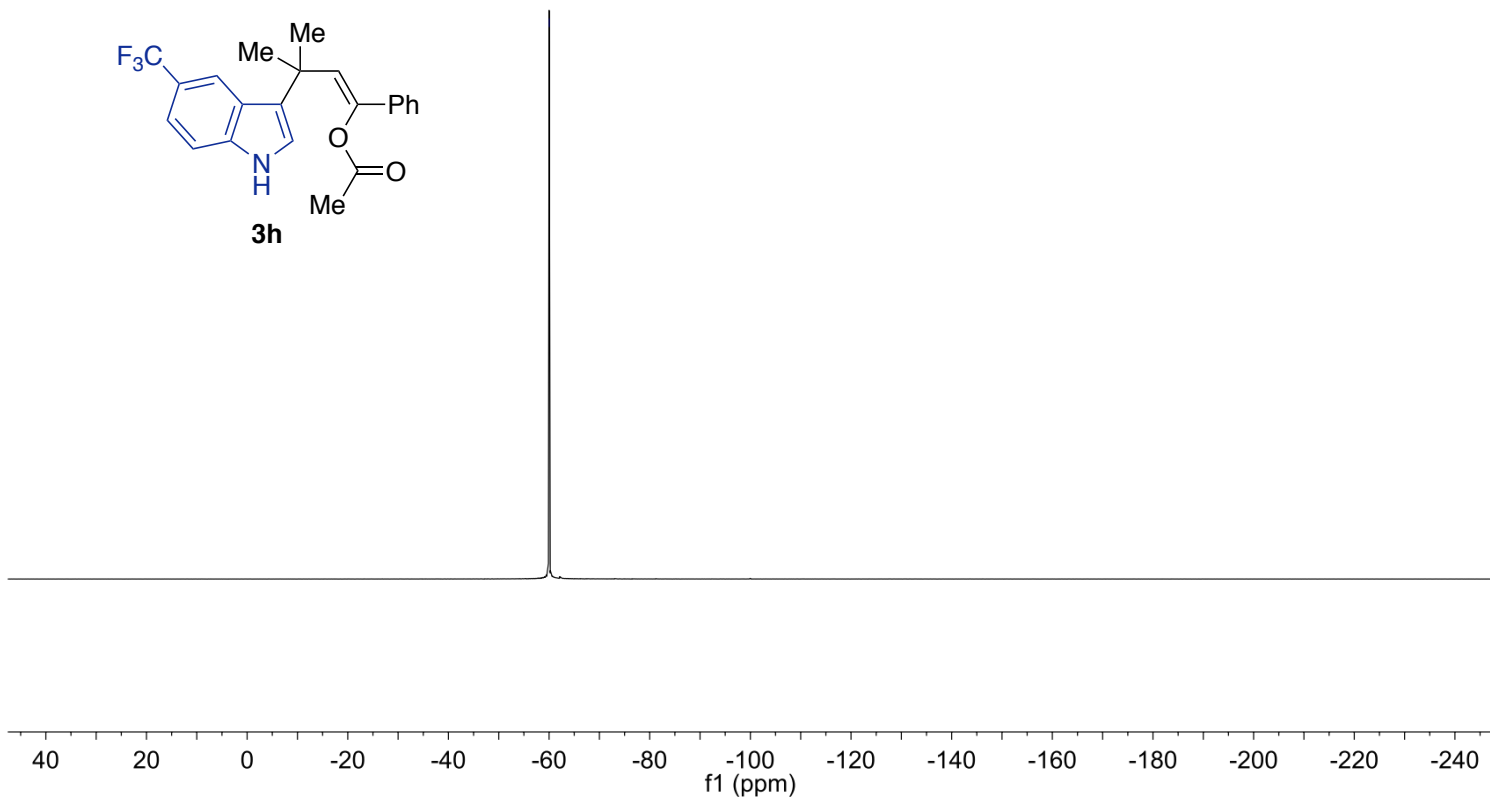

TSH-N6-83-7 1H

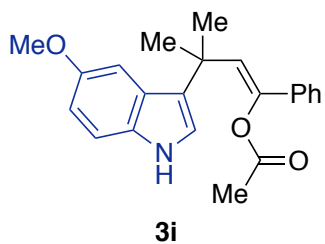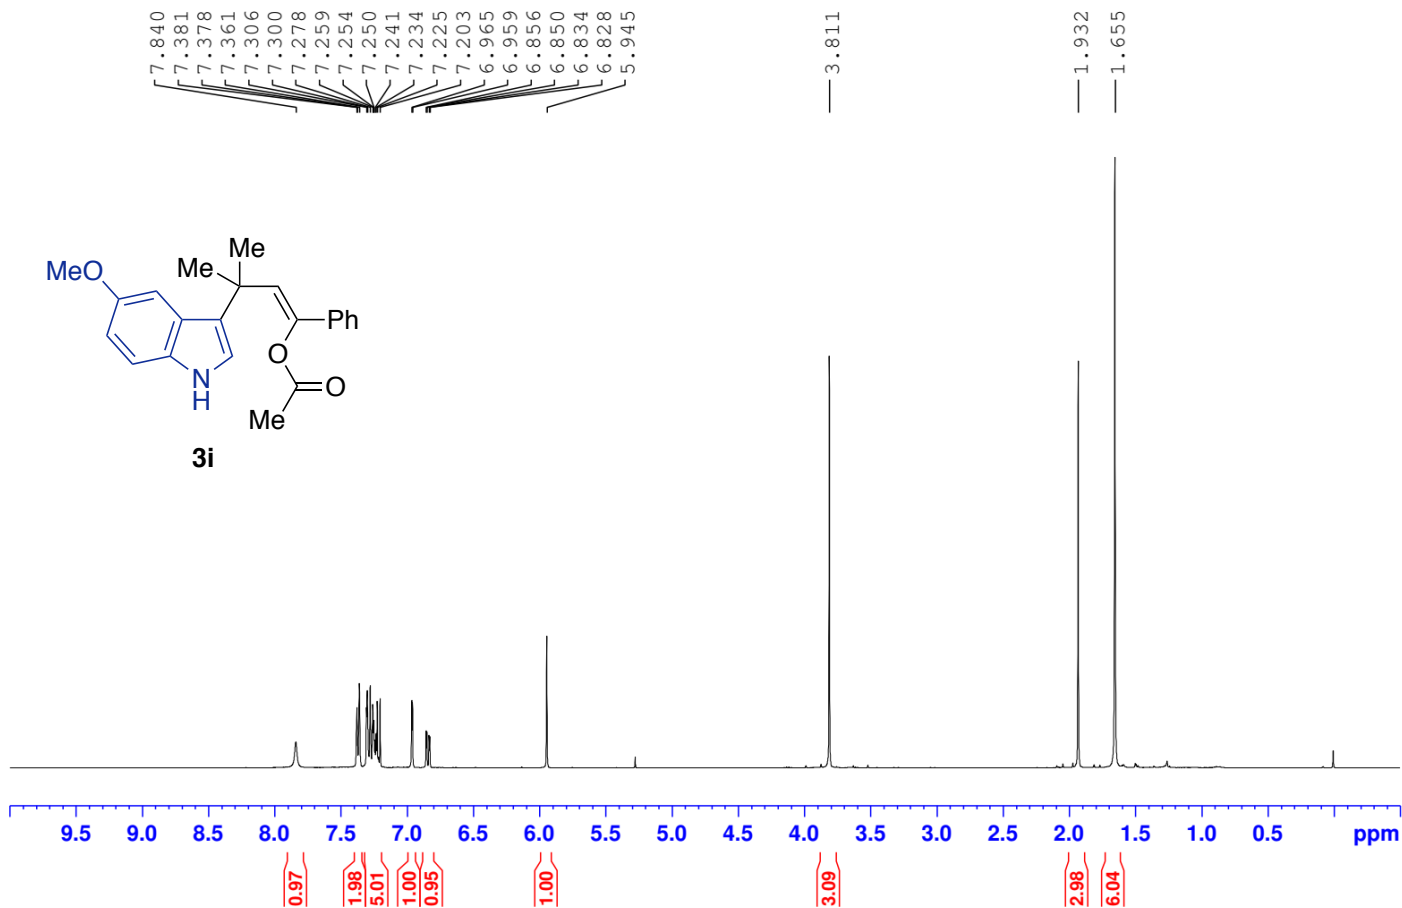

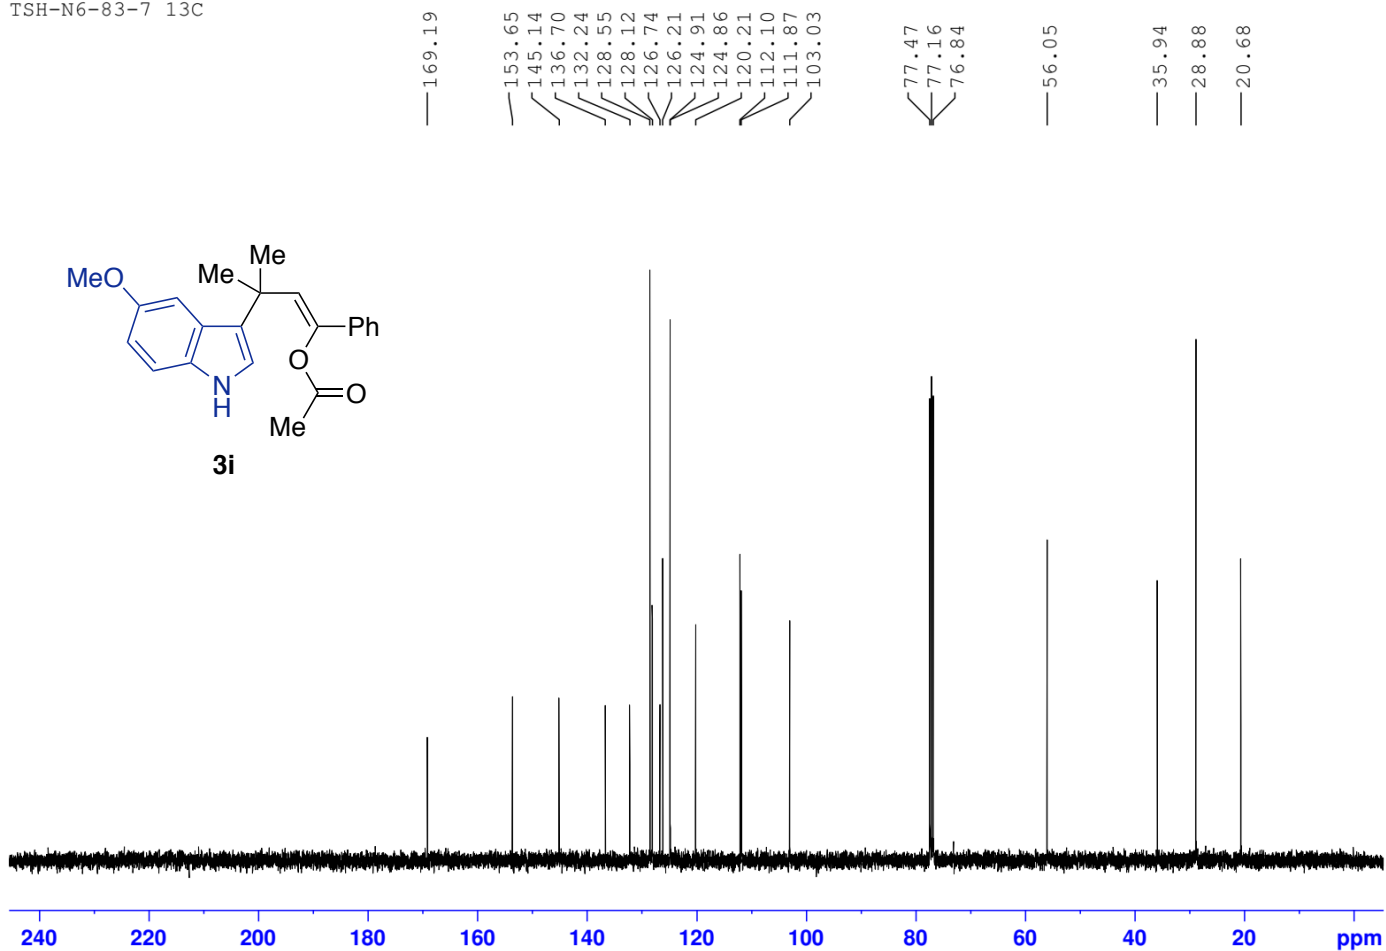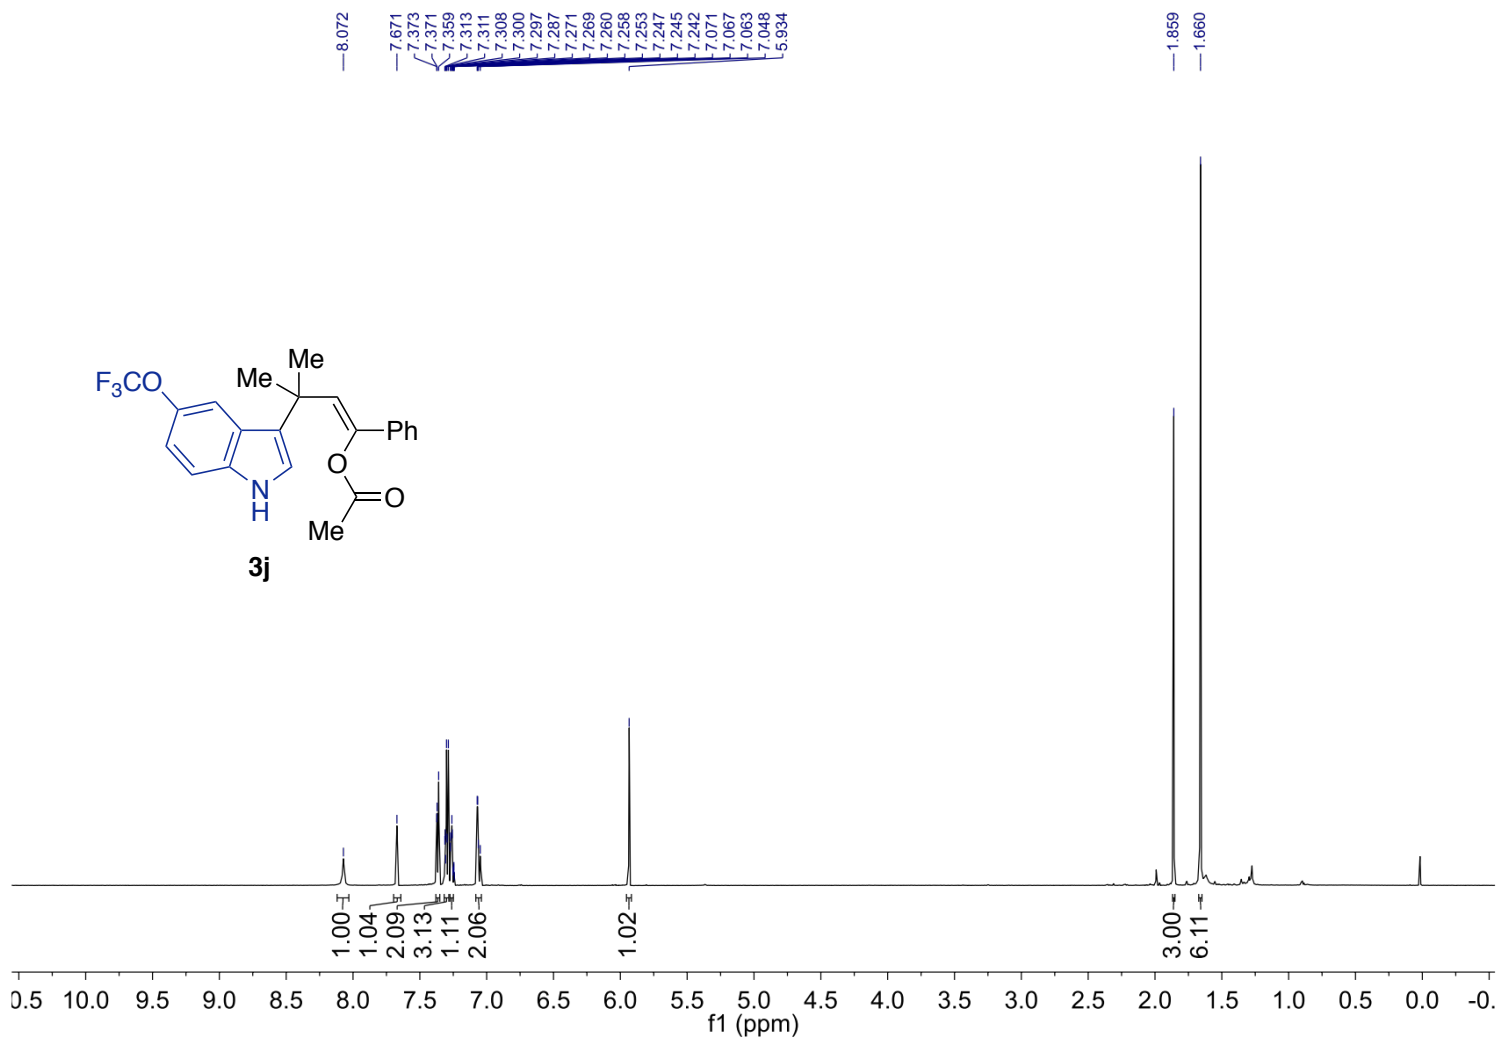

169.00

145.60  
142.58  
142.57  
142.56  
142.55  
136.48  
135.37  
128.56  
128.27  
126.51  
125.72  
125.49  
124.93  
123.52  
121.83  
121.55  
120.14  
118.45  
115.93  
113.68  
111.76

77.37  
77.16  
76.95

35.74

29.24

20.50

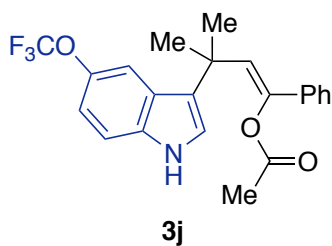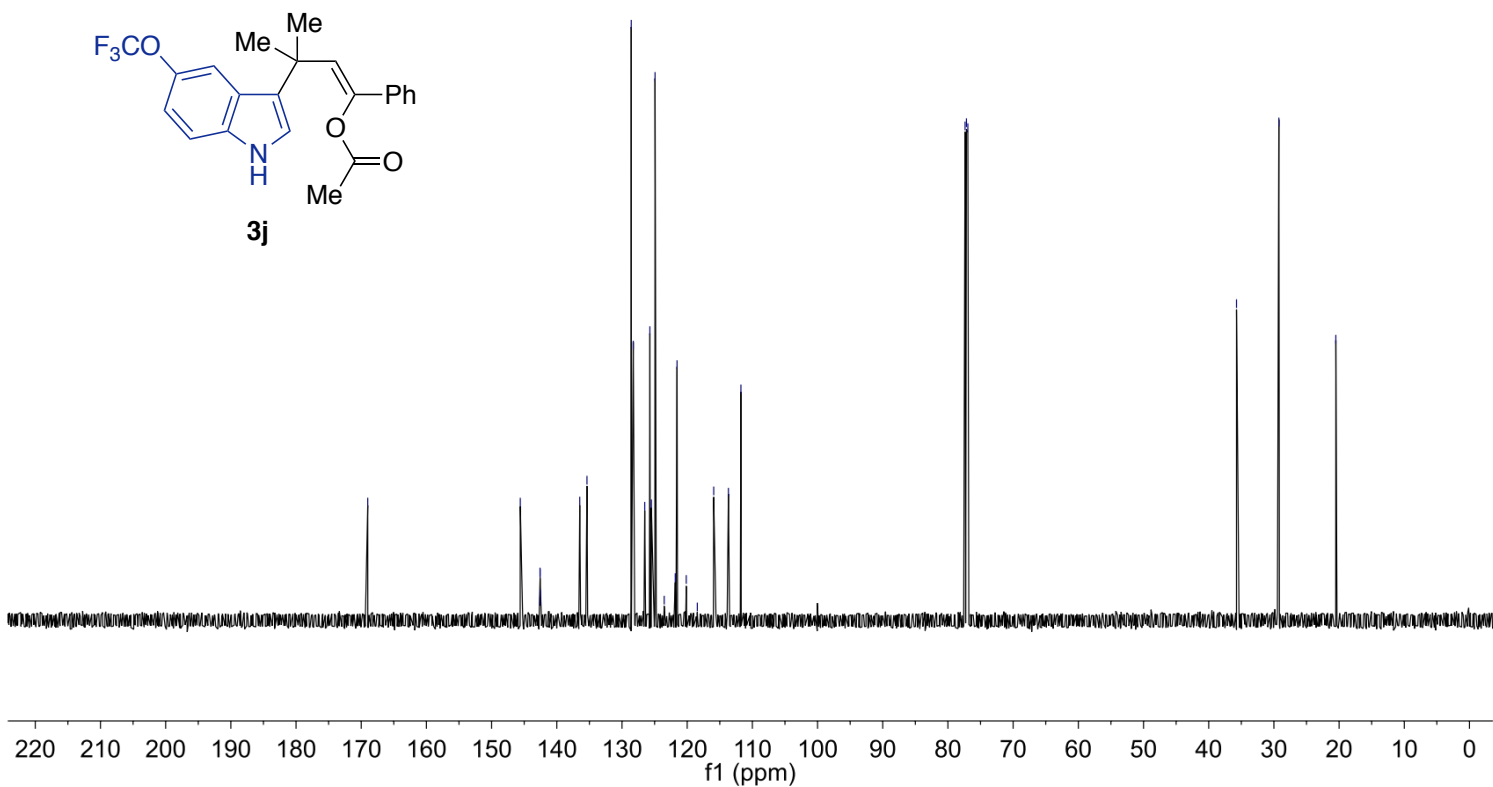

57.985

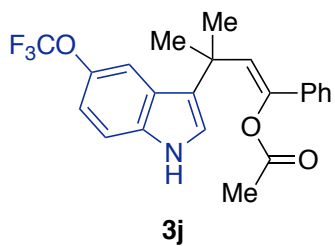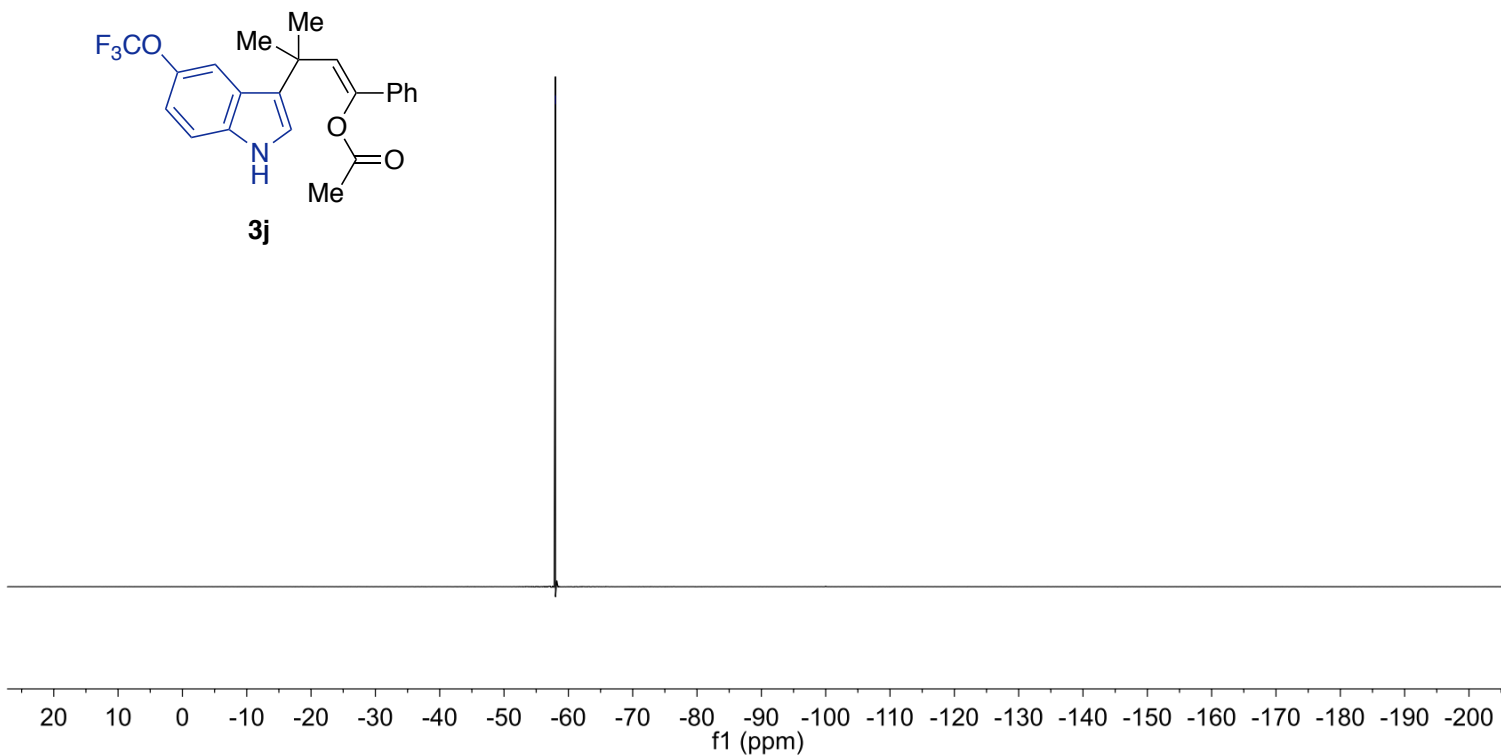

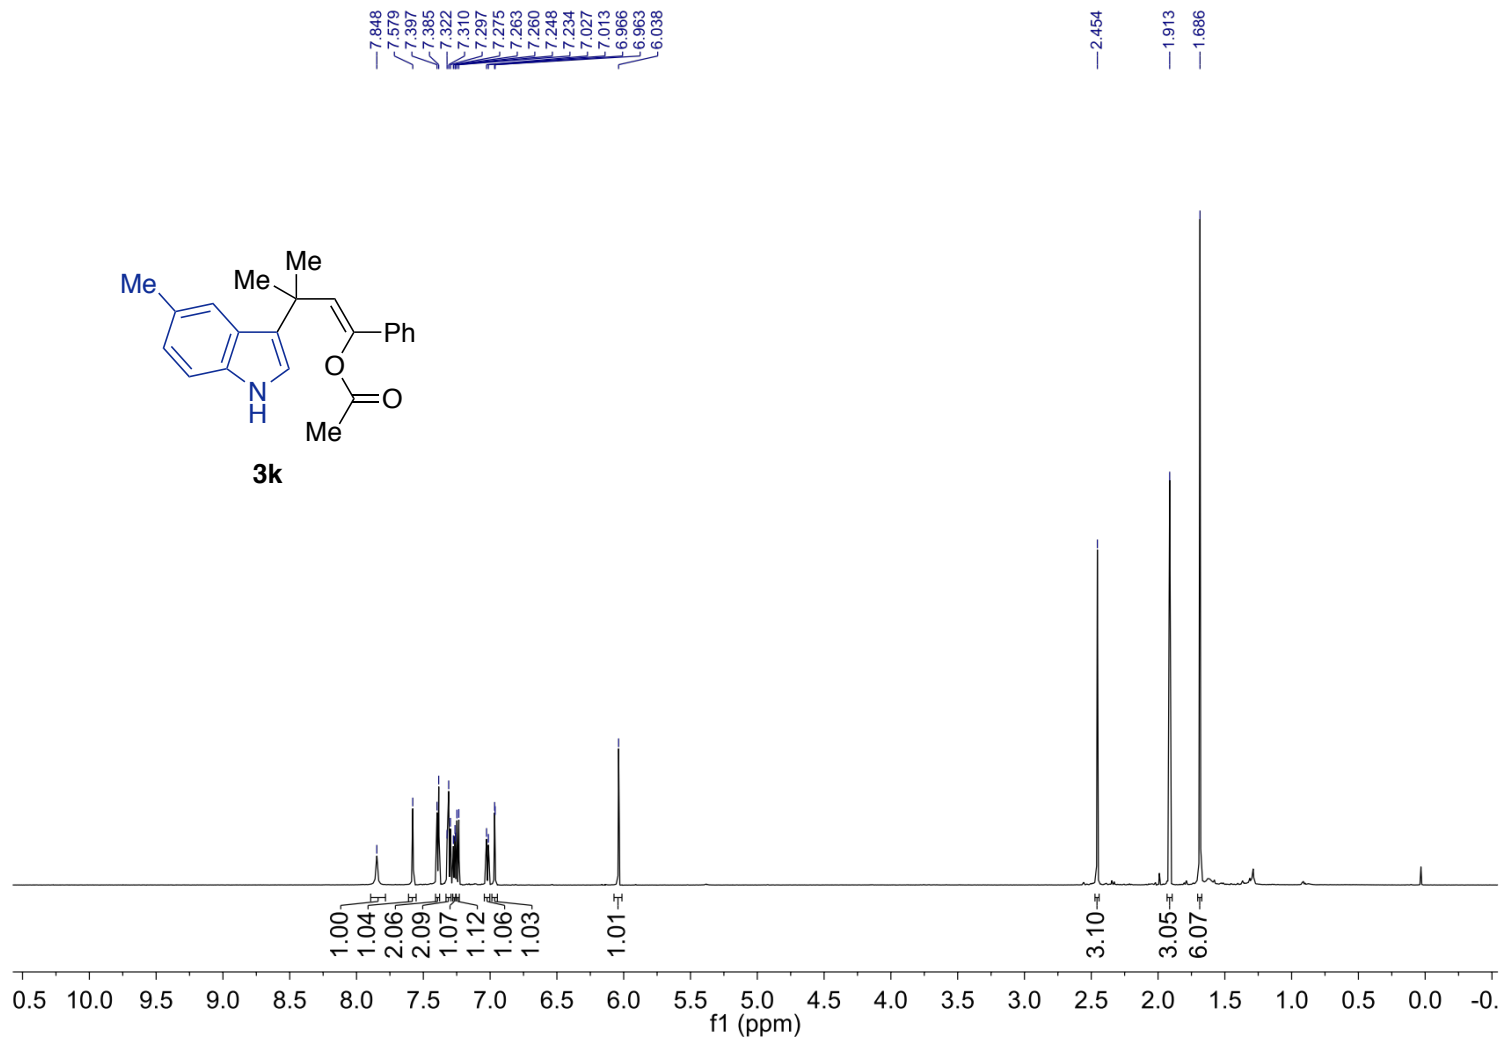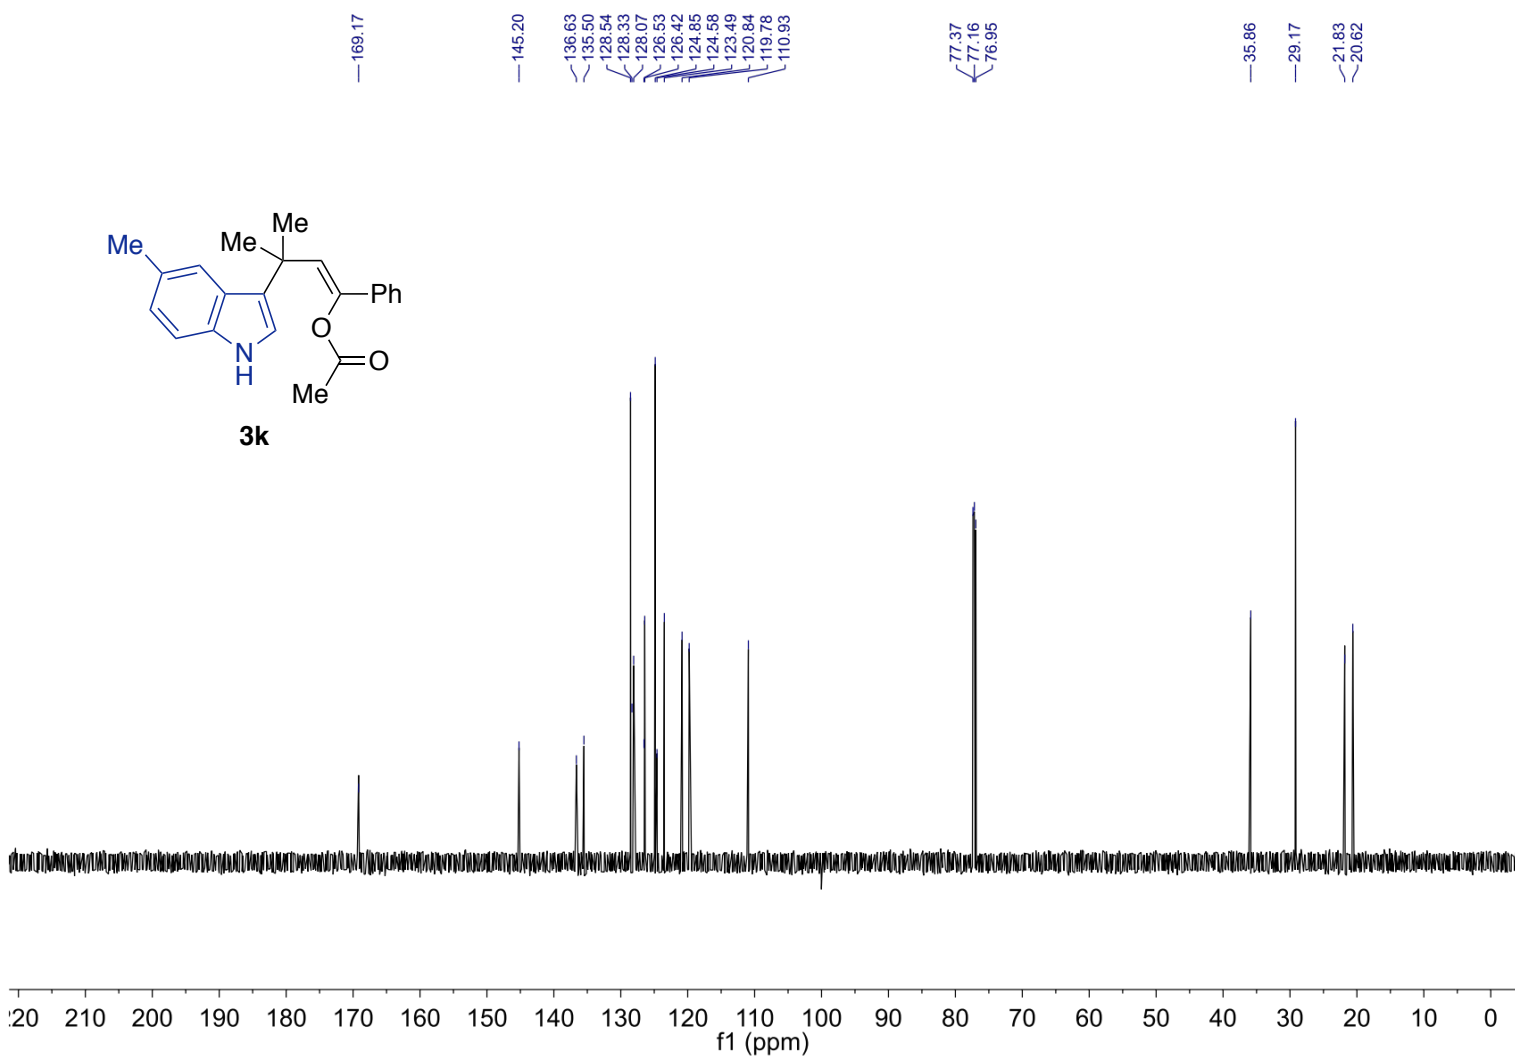

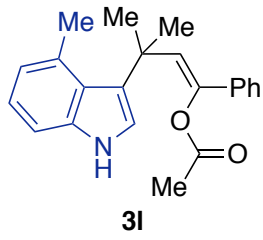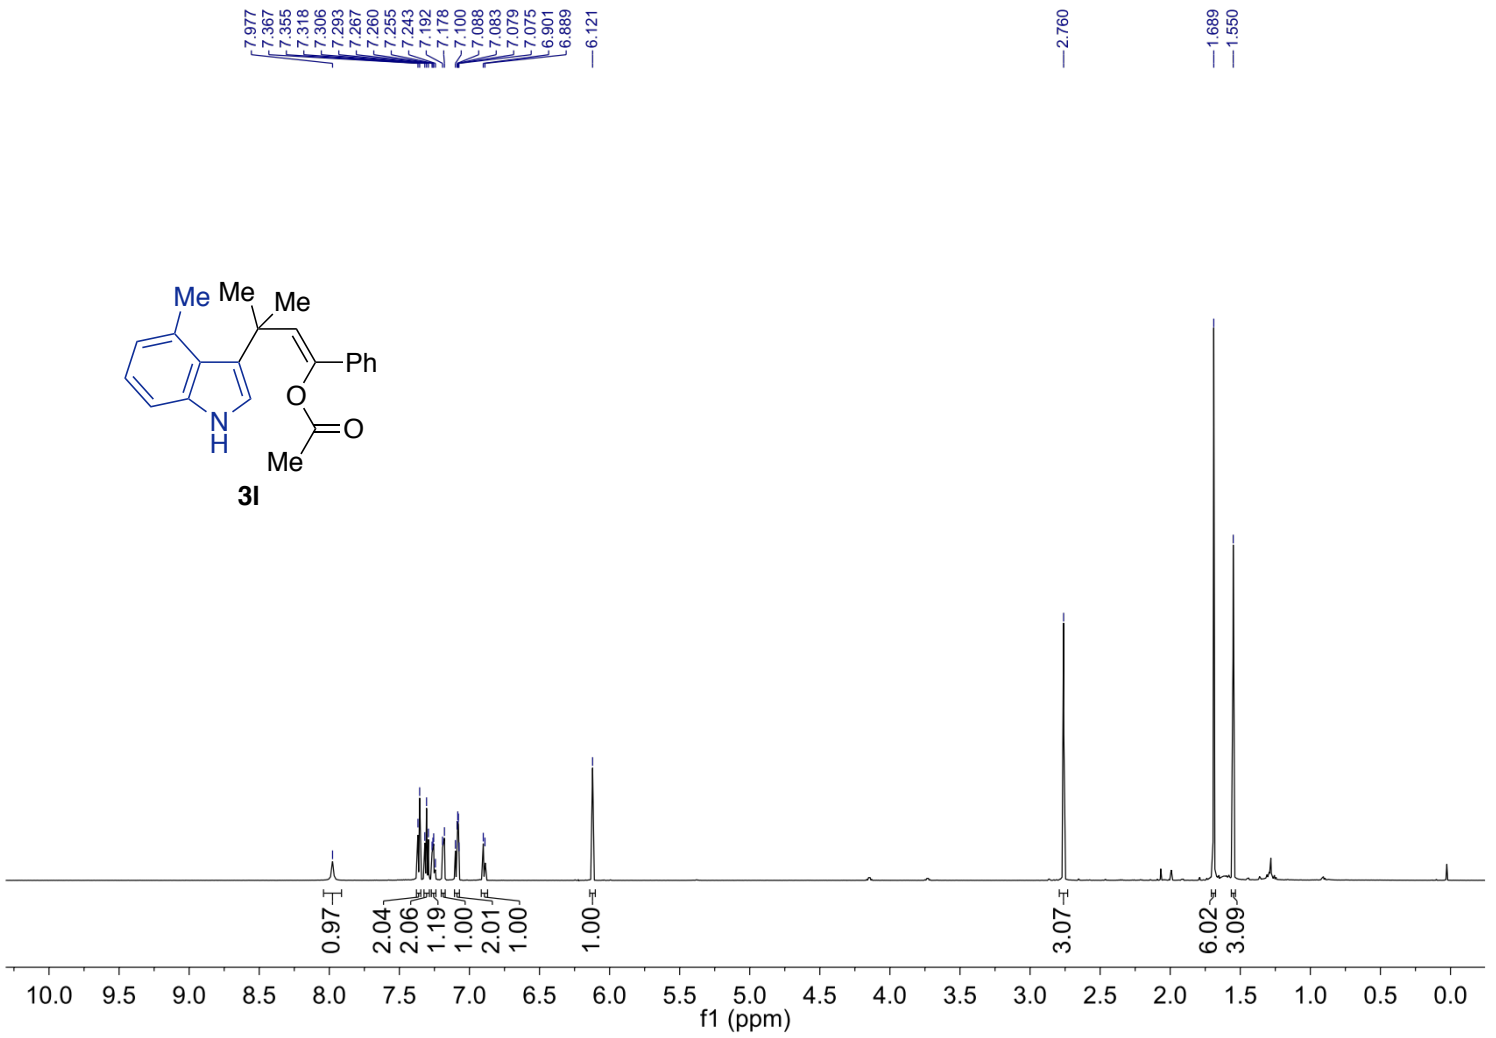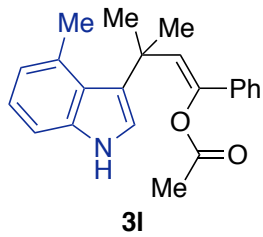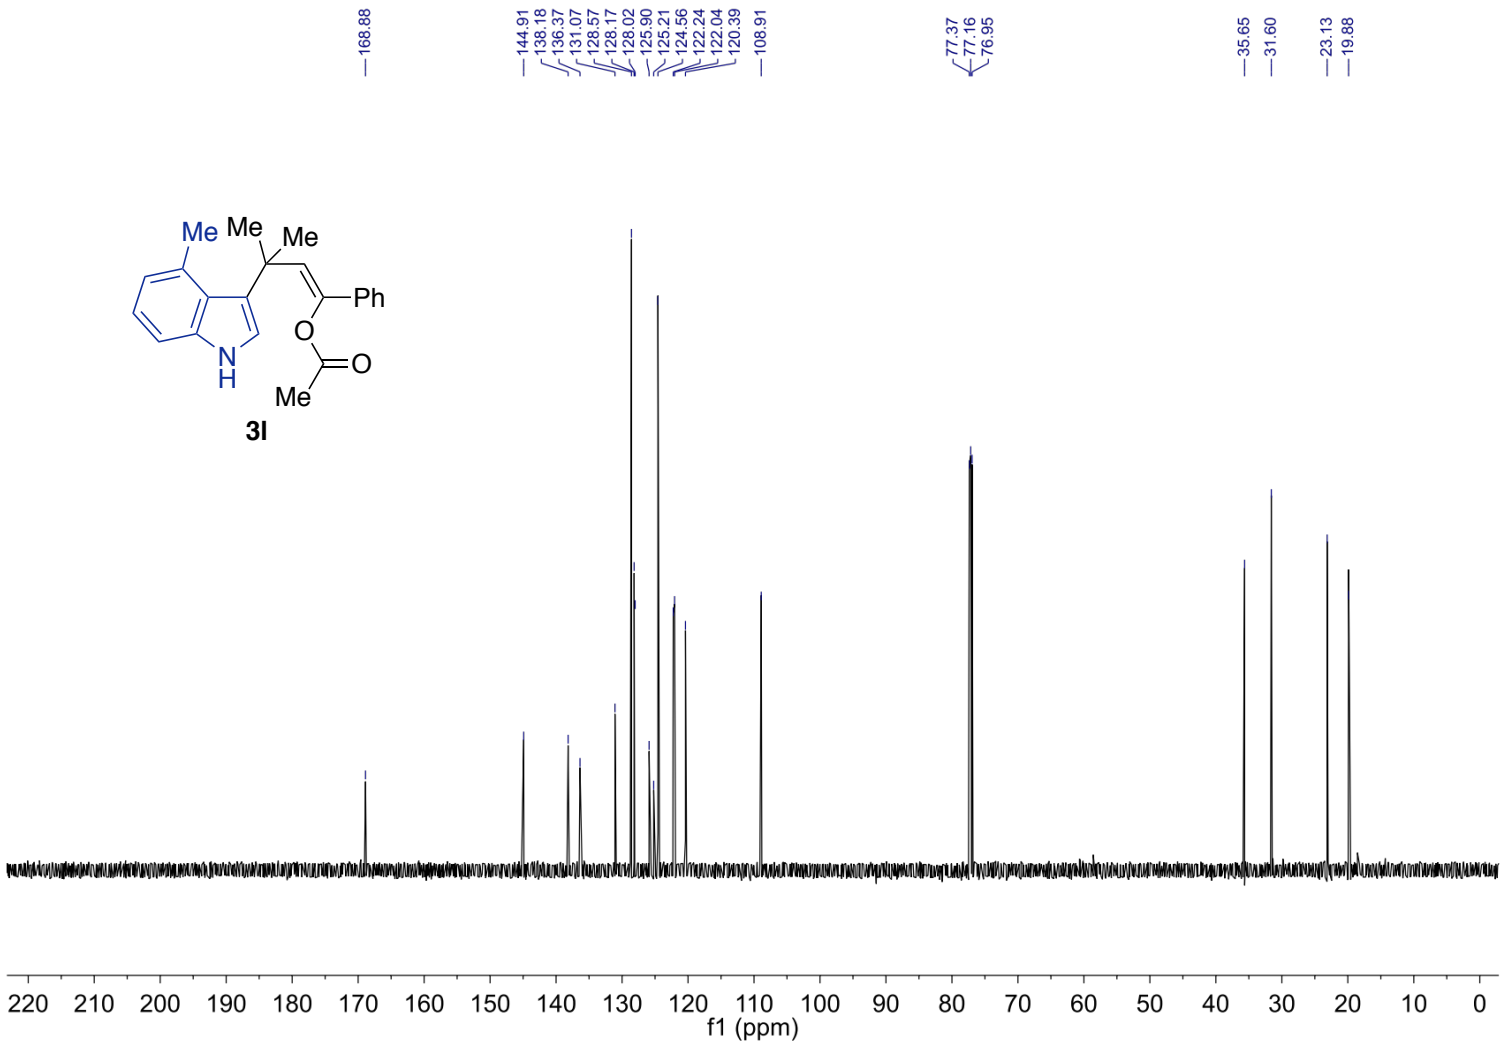

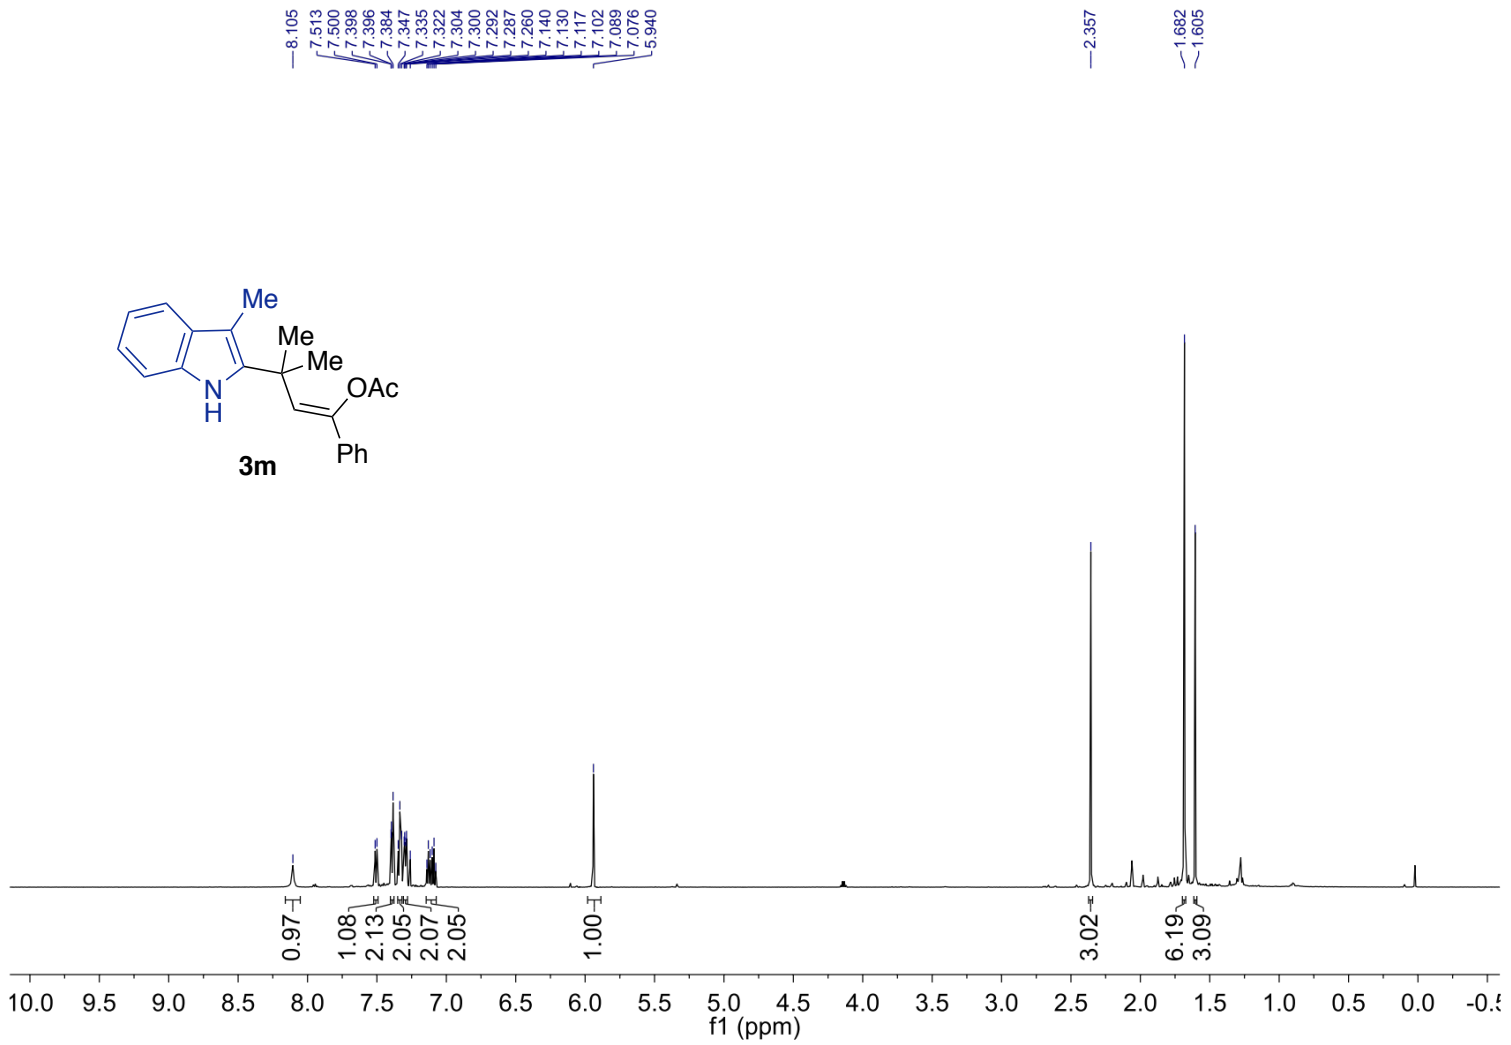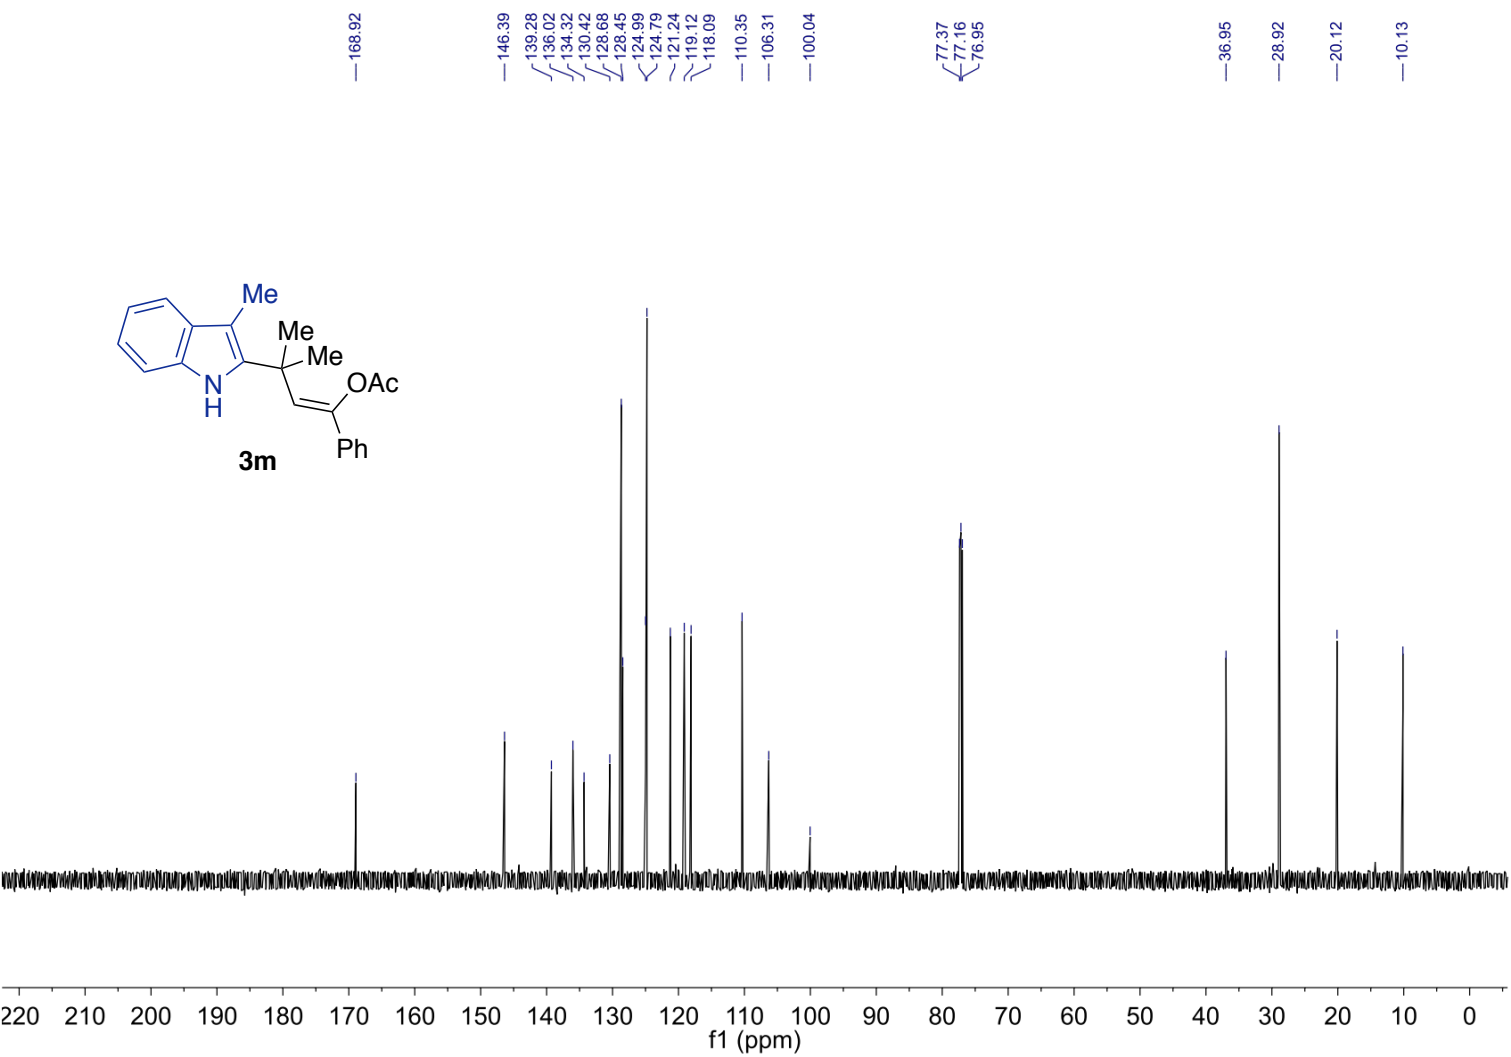



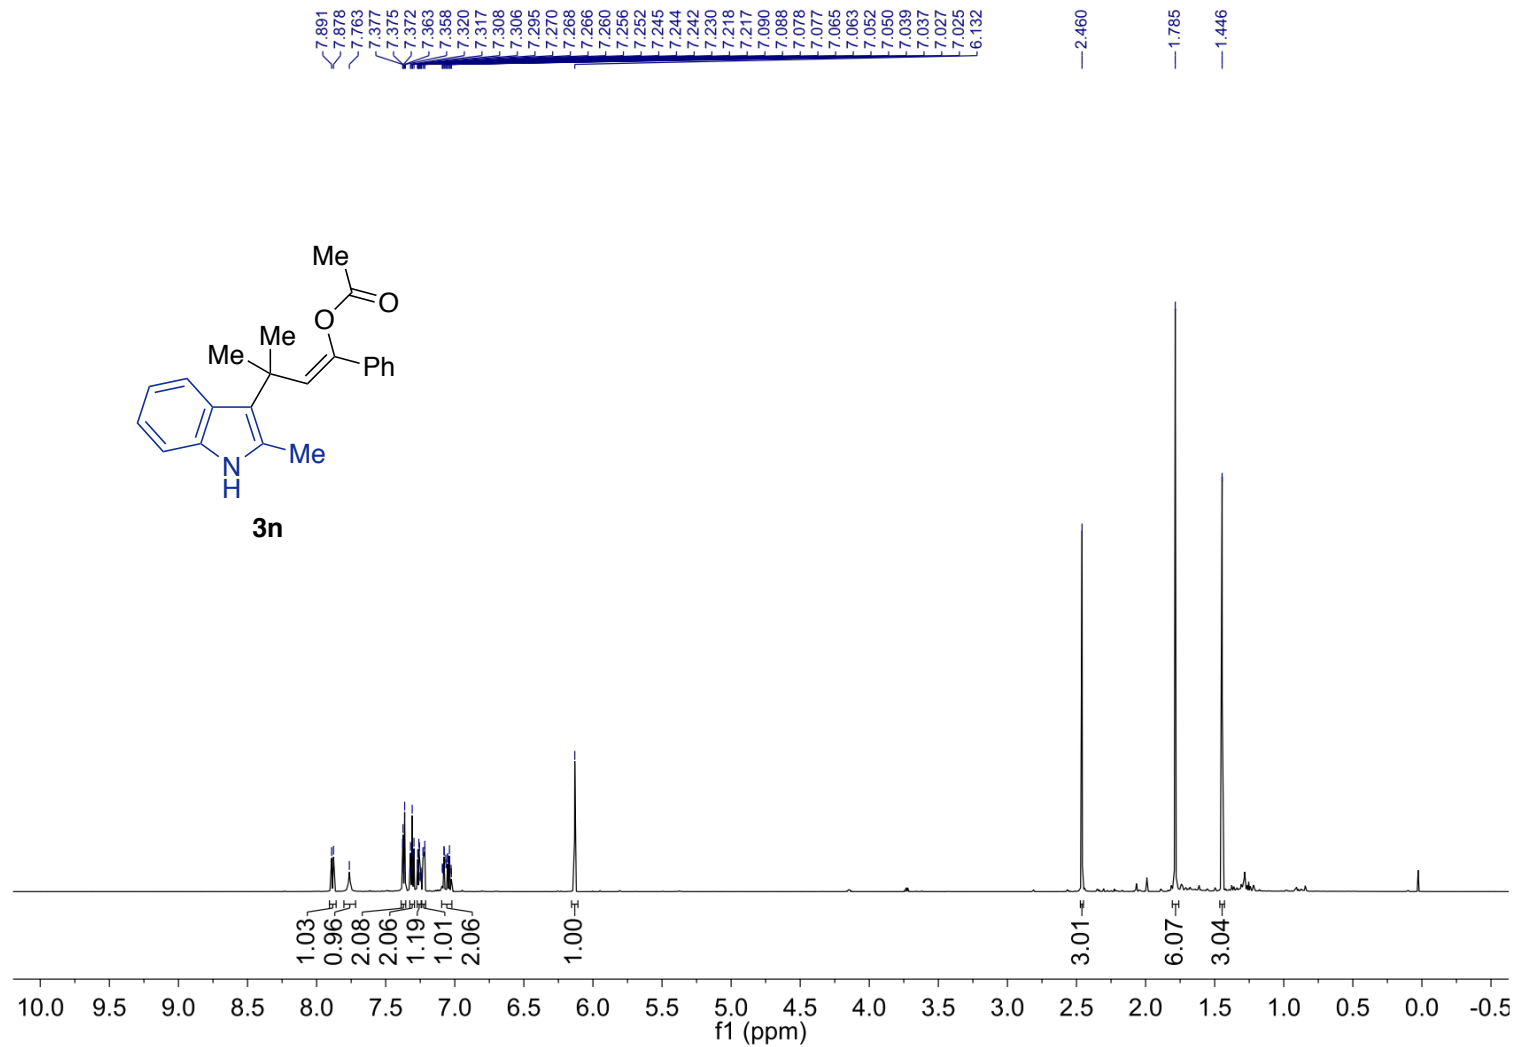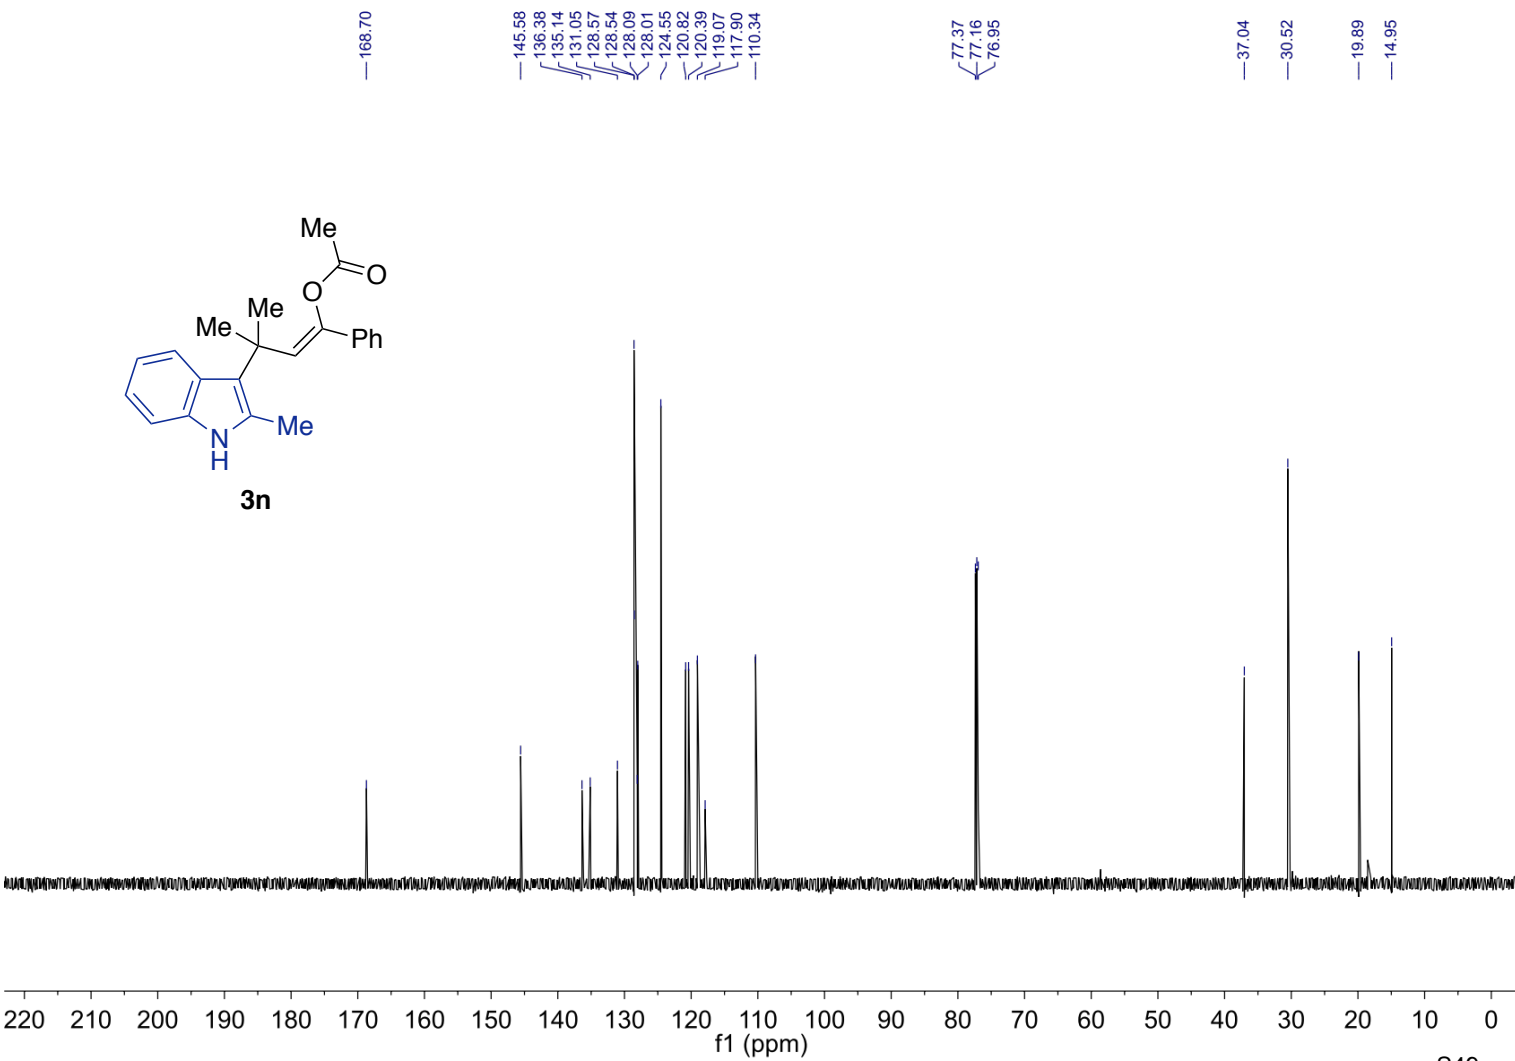

TSH-N6-83-4 1H

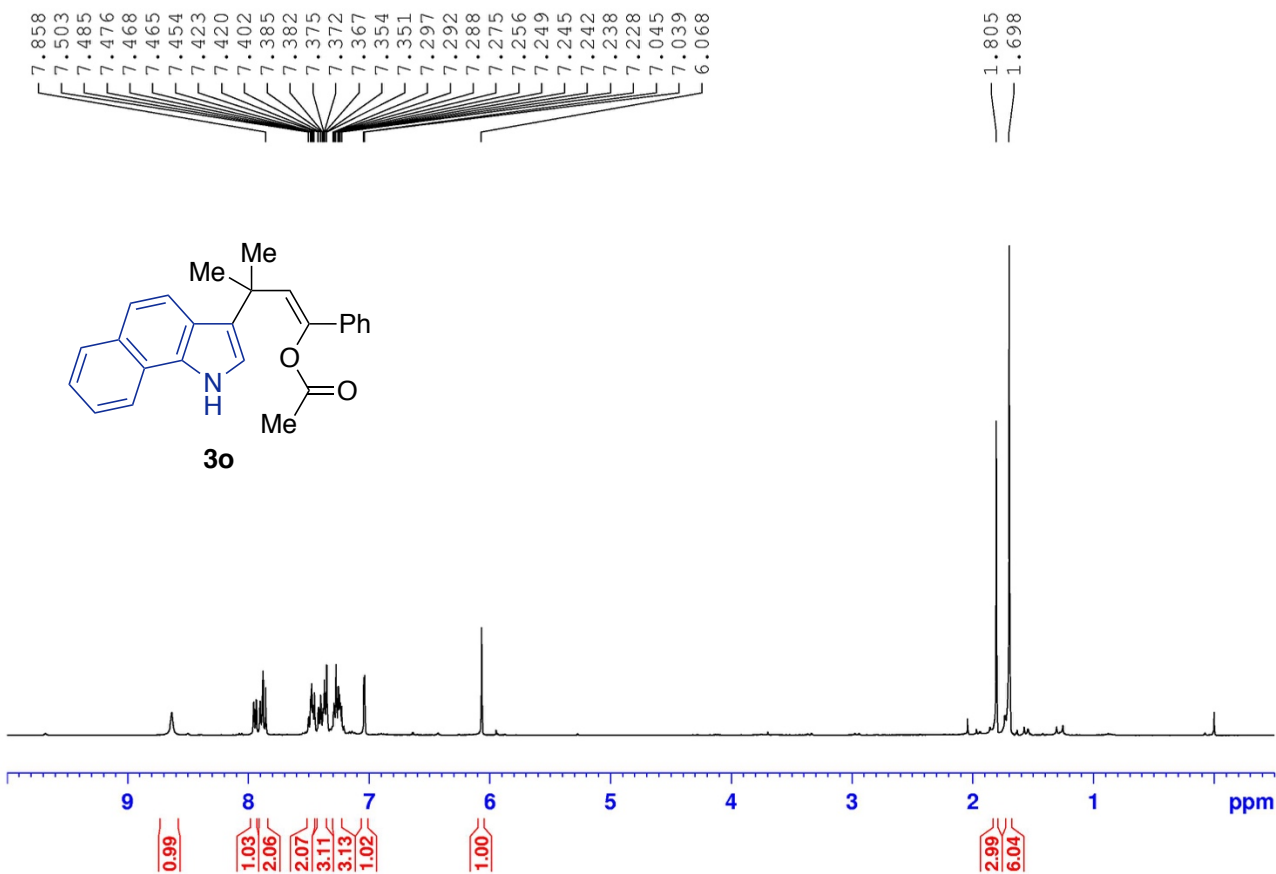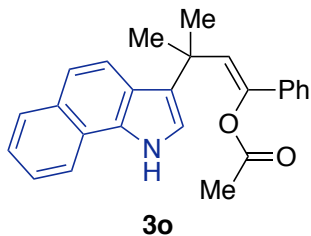

TSH-N6-83-4 13C

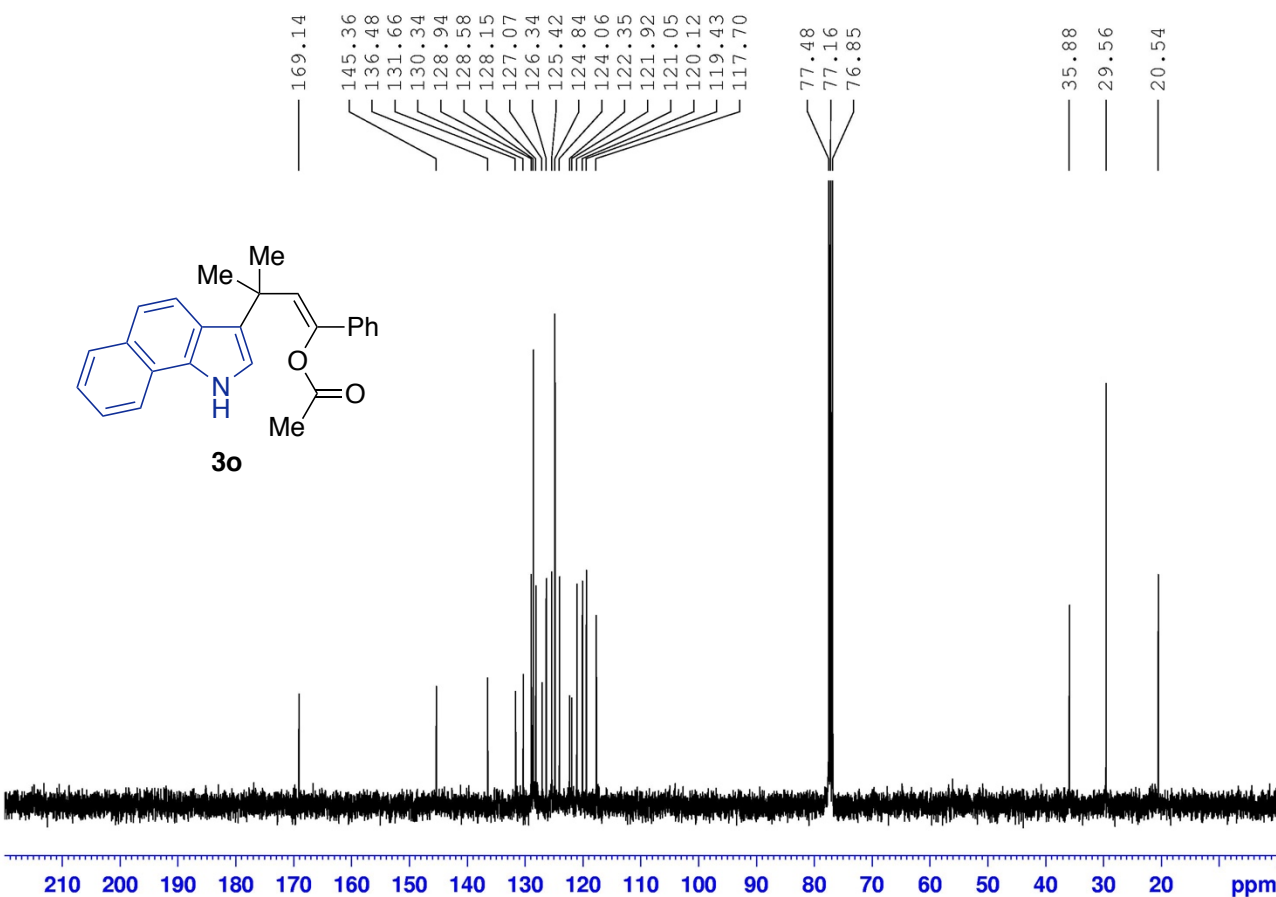

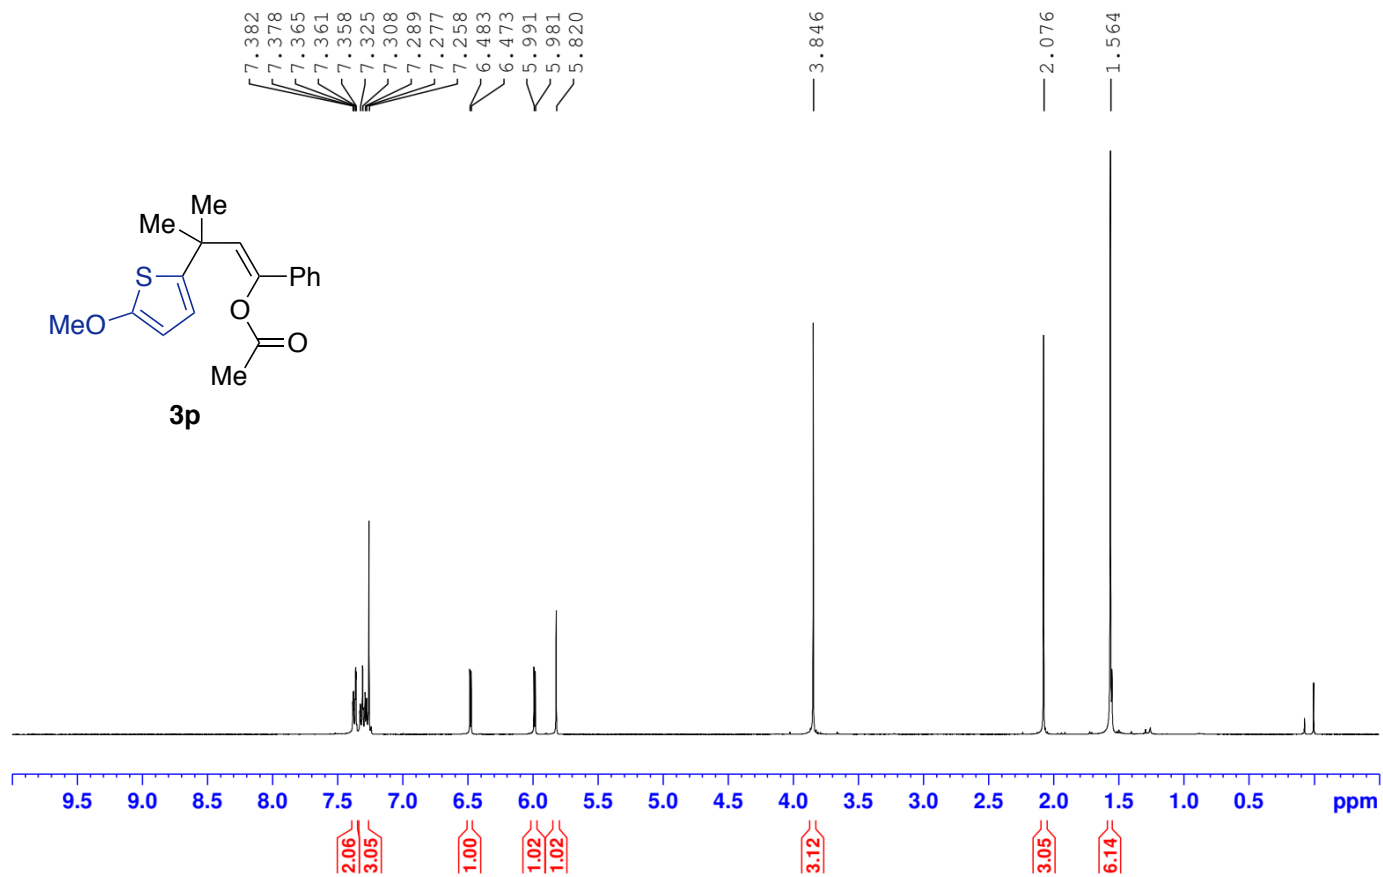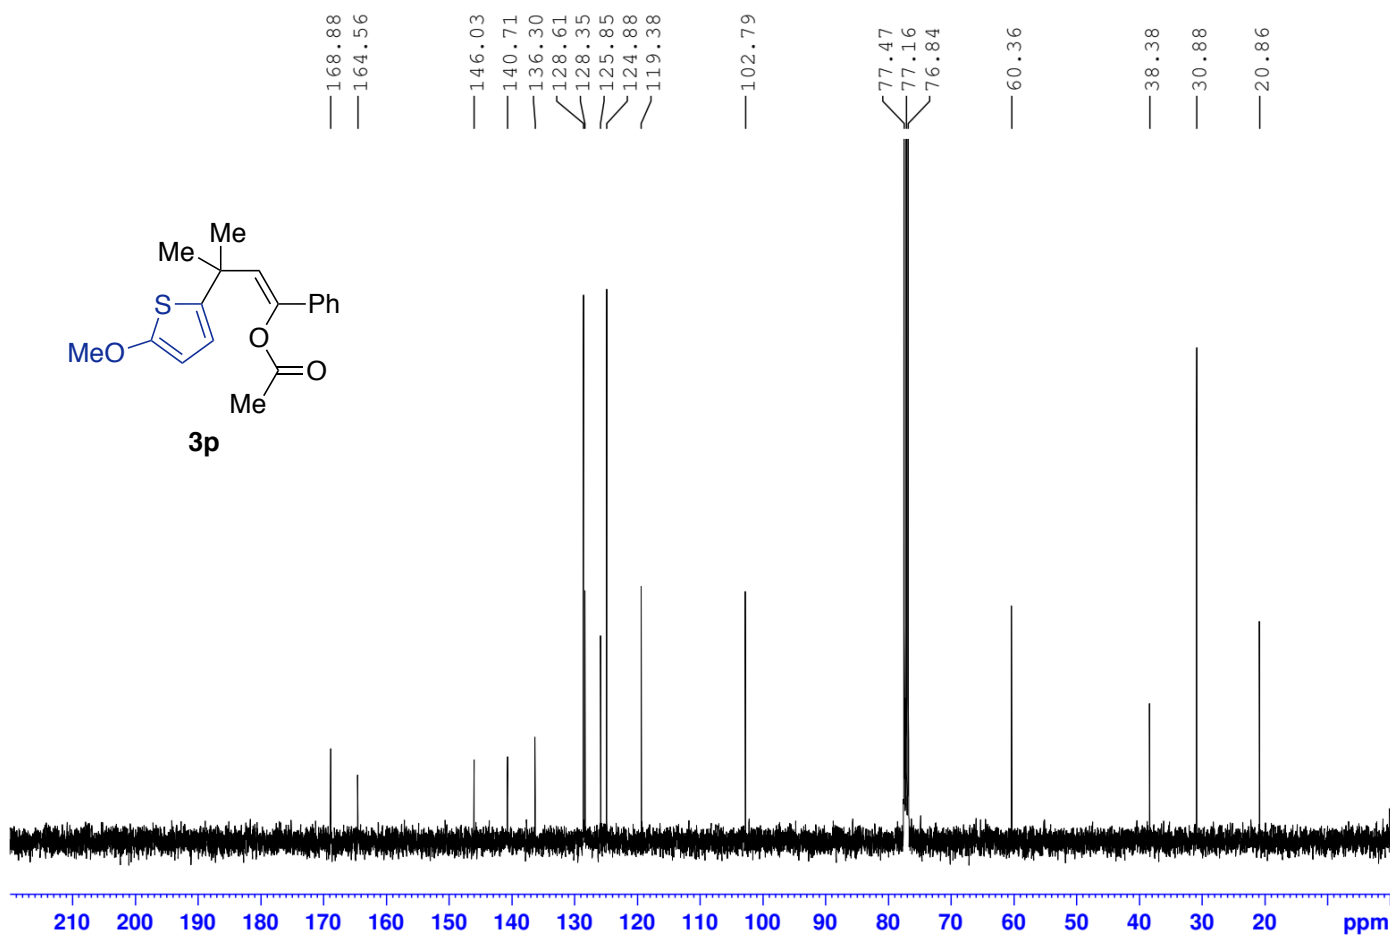

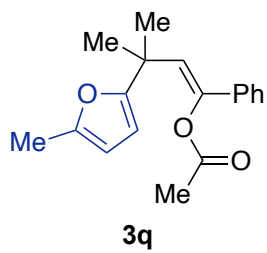

7.367  
7.352  
7.304  
7.293  
7.279  
7.256  
7.244  
7.232

5.933  
5.928  
5.848  
5.843  
5.801

2.255

1.993

1.487

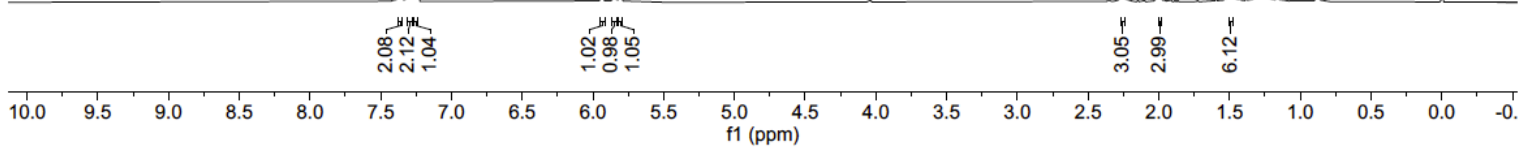

168.77

159.45

150.81

145.71

136.15

128.56

128.24

124.78

124.48

105.70

103.94

77.37

77.16

76.95

36.56

28.16

20.76

13.71

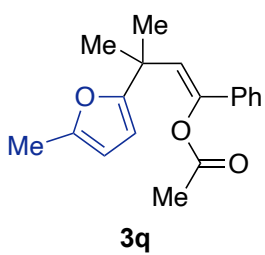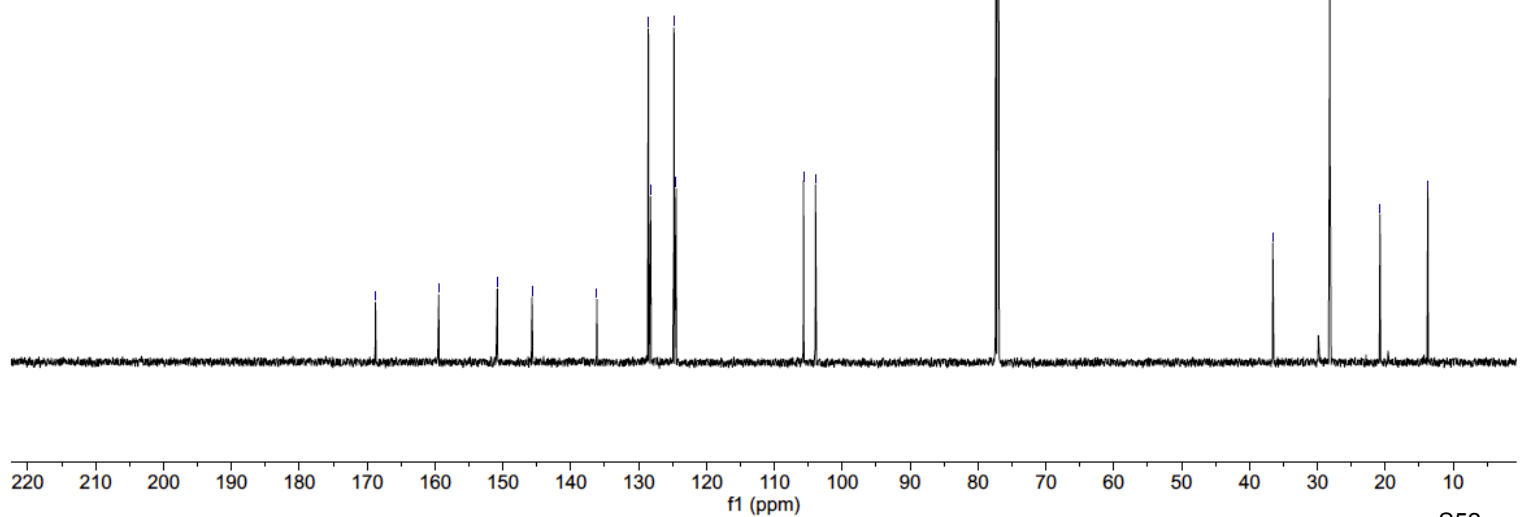

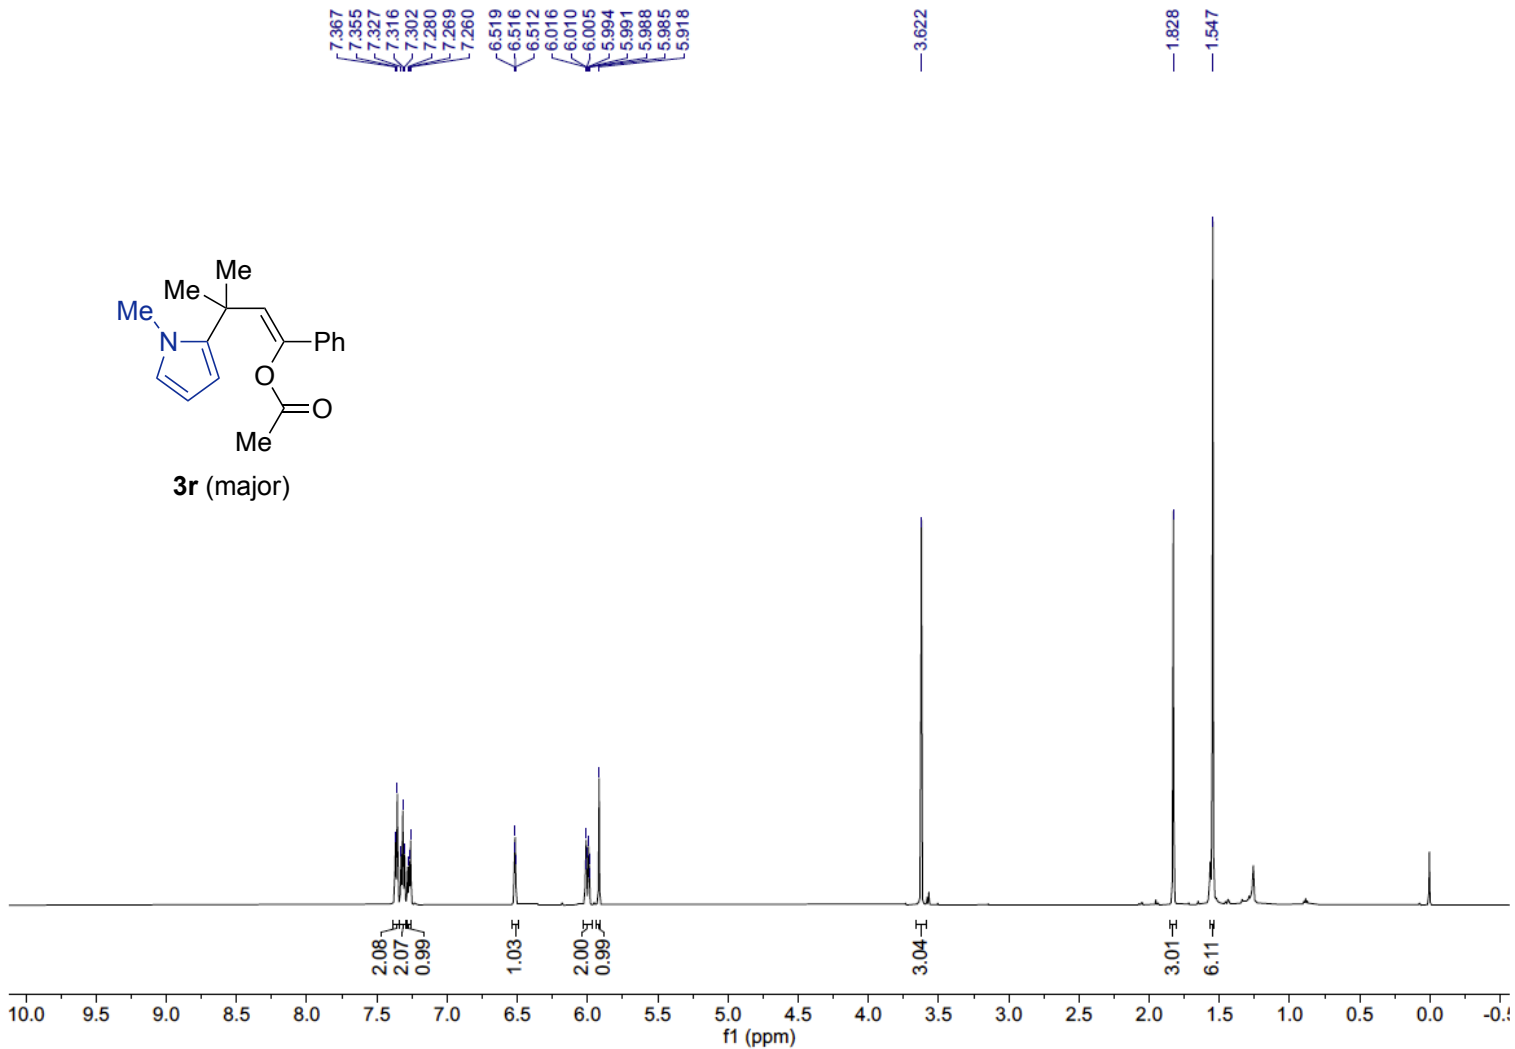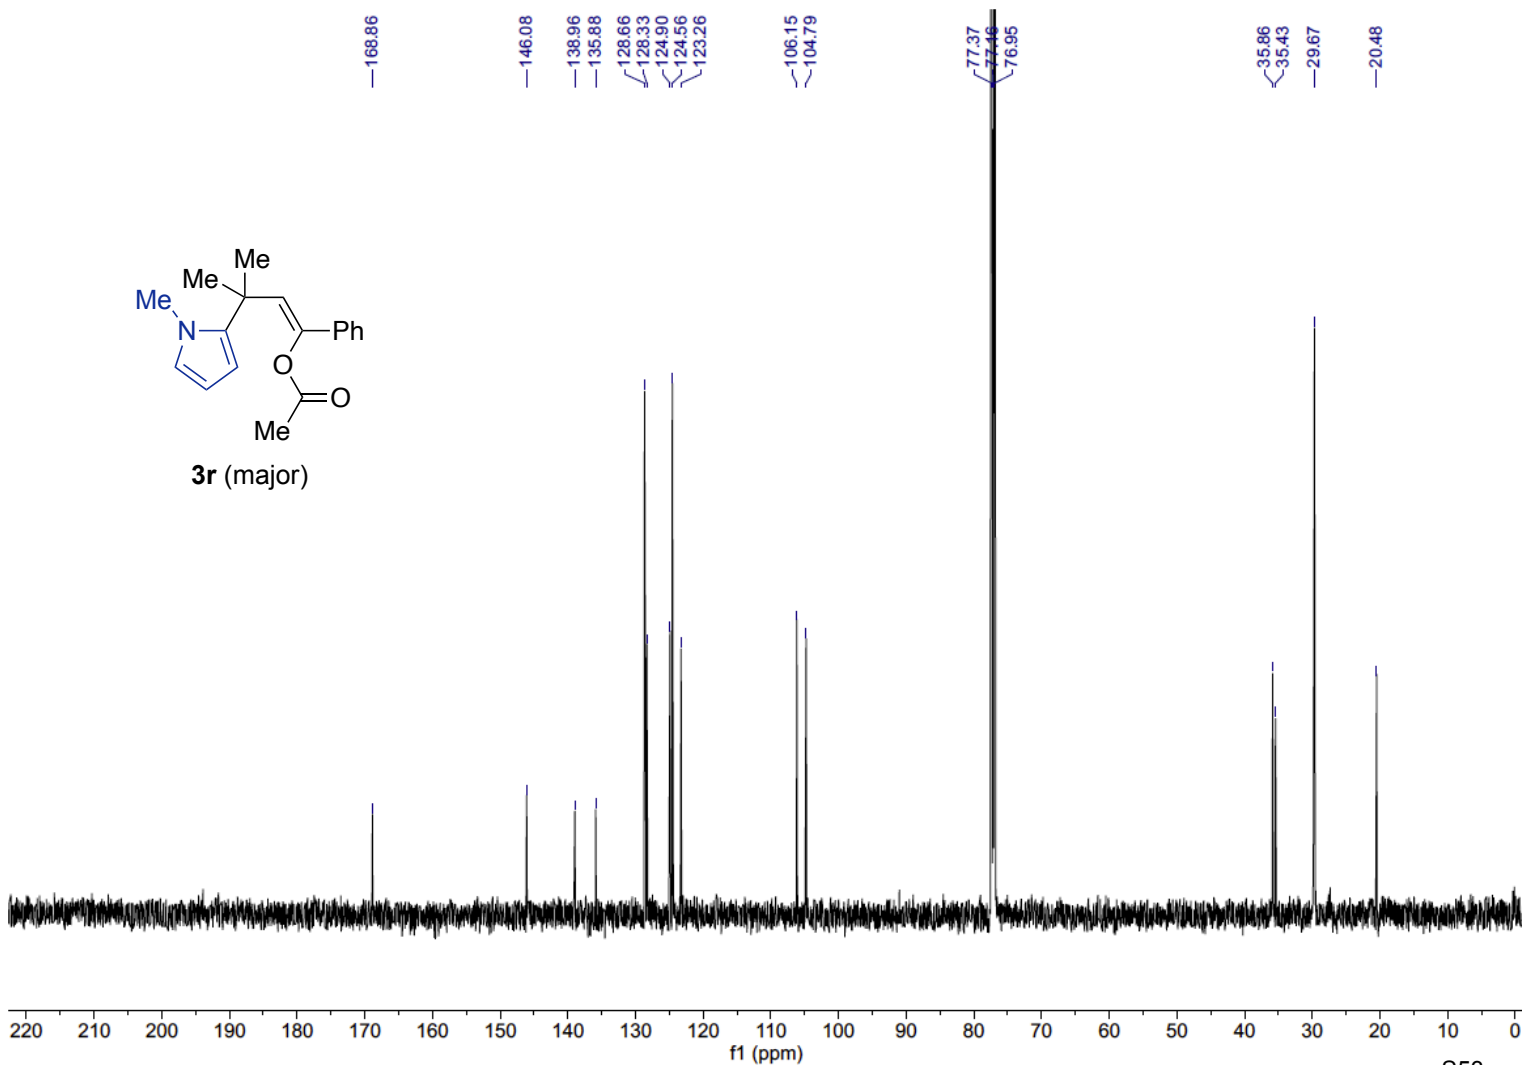

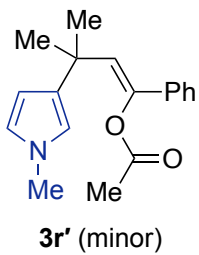

7.376  
 7.363  
 7.306  
 7.294  
 7.280  
 7.260  
 7.248  
 7.238  
 7.224  
 6.521  
 6.516  
 6.512  
 6.460  
 6.457  
 6.453  
 6.099  
 6.096  
 6.091  
 5.858

3.606

2.059

1.494

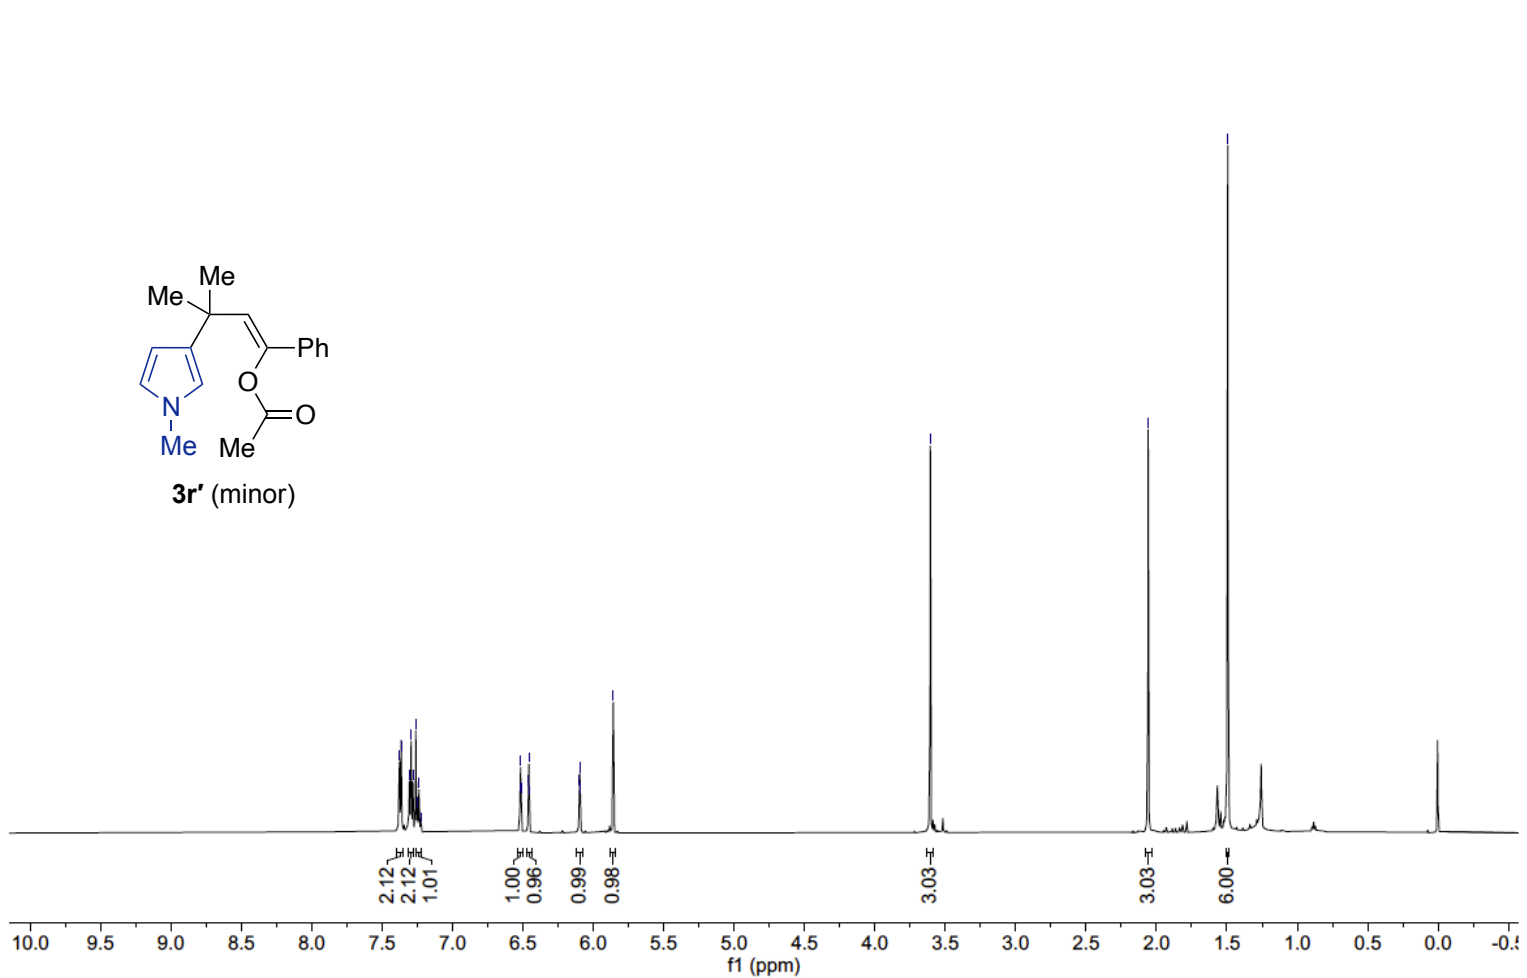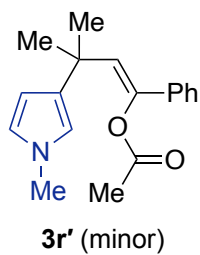

169.19

144.50

136.72

133.40

128.53

127.96

127.43

124.71

121.49

118.00

106.77

77.37

77.16

76.95

36.19

35.46

30.27

20.83

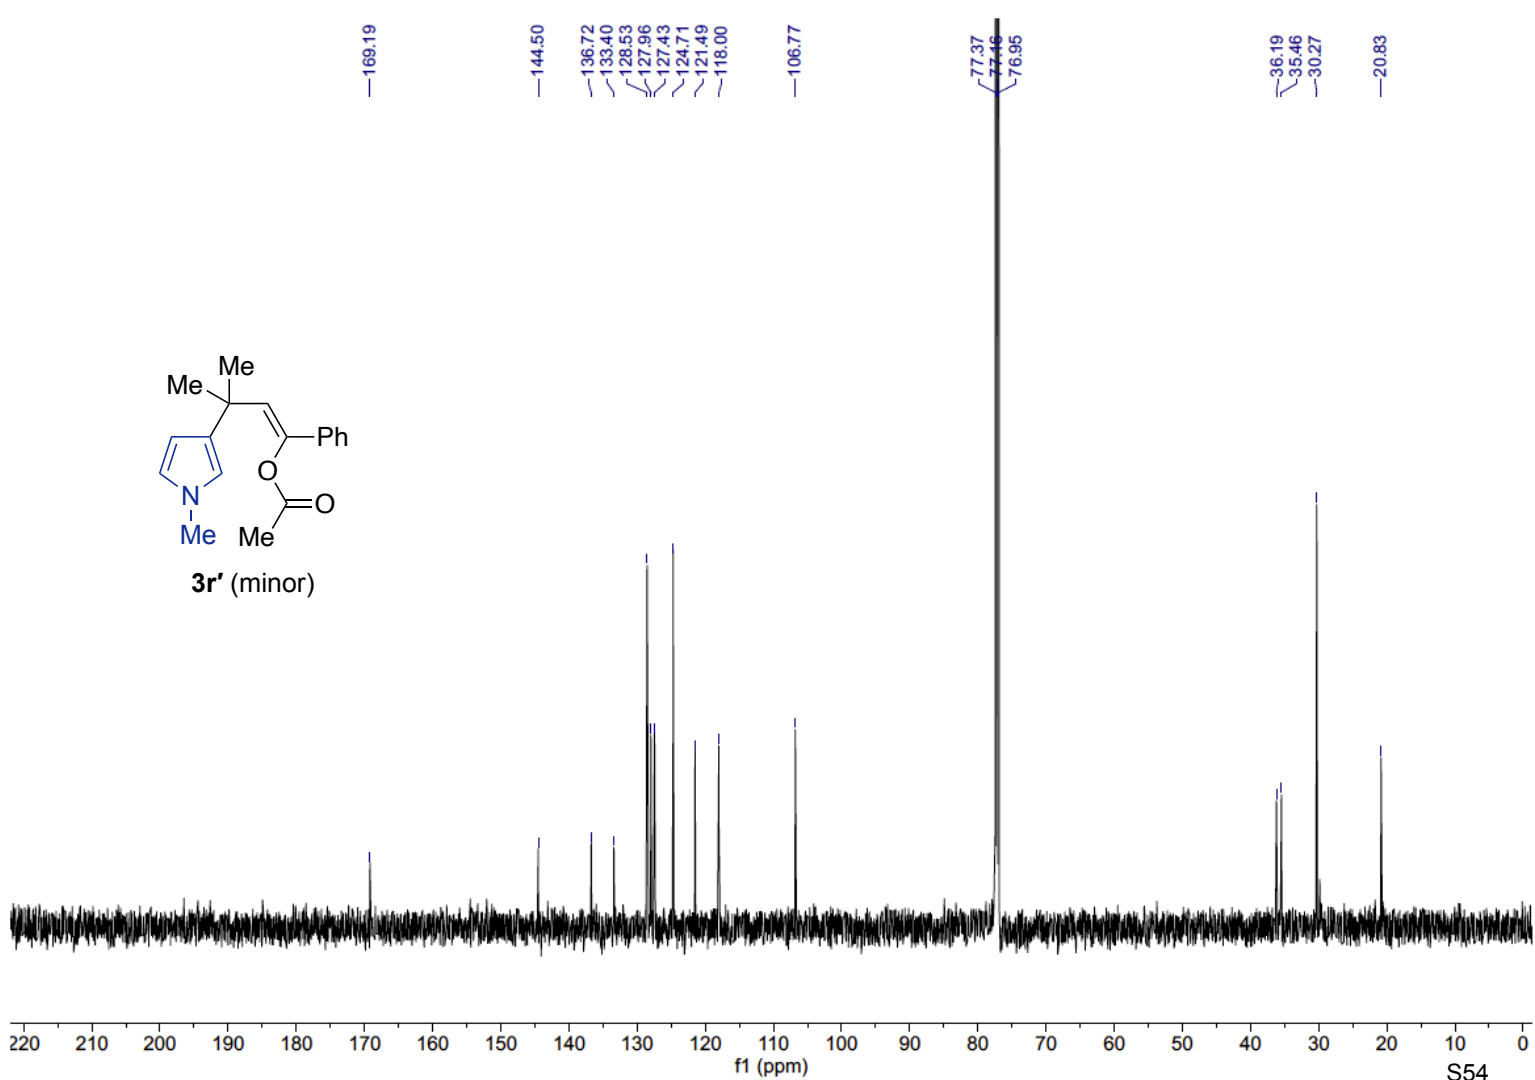

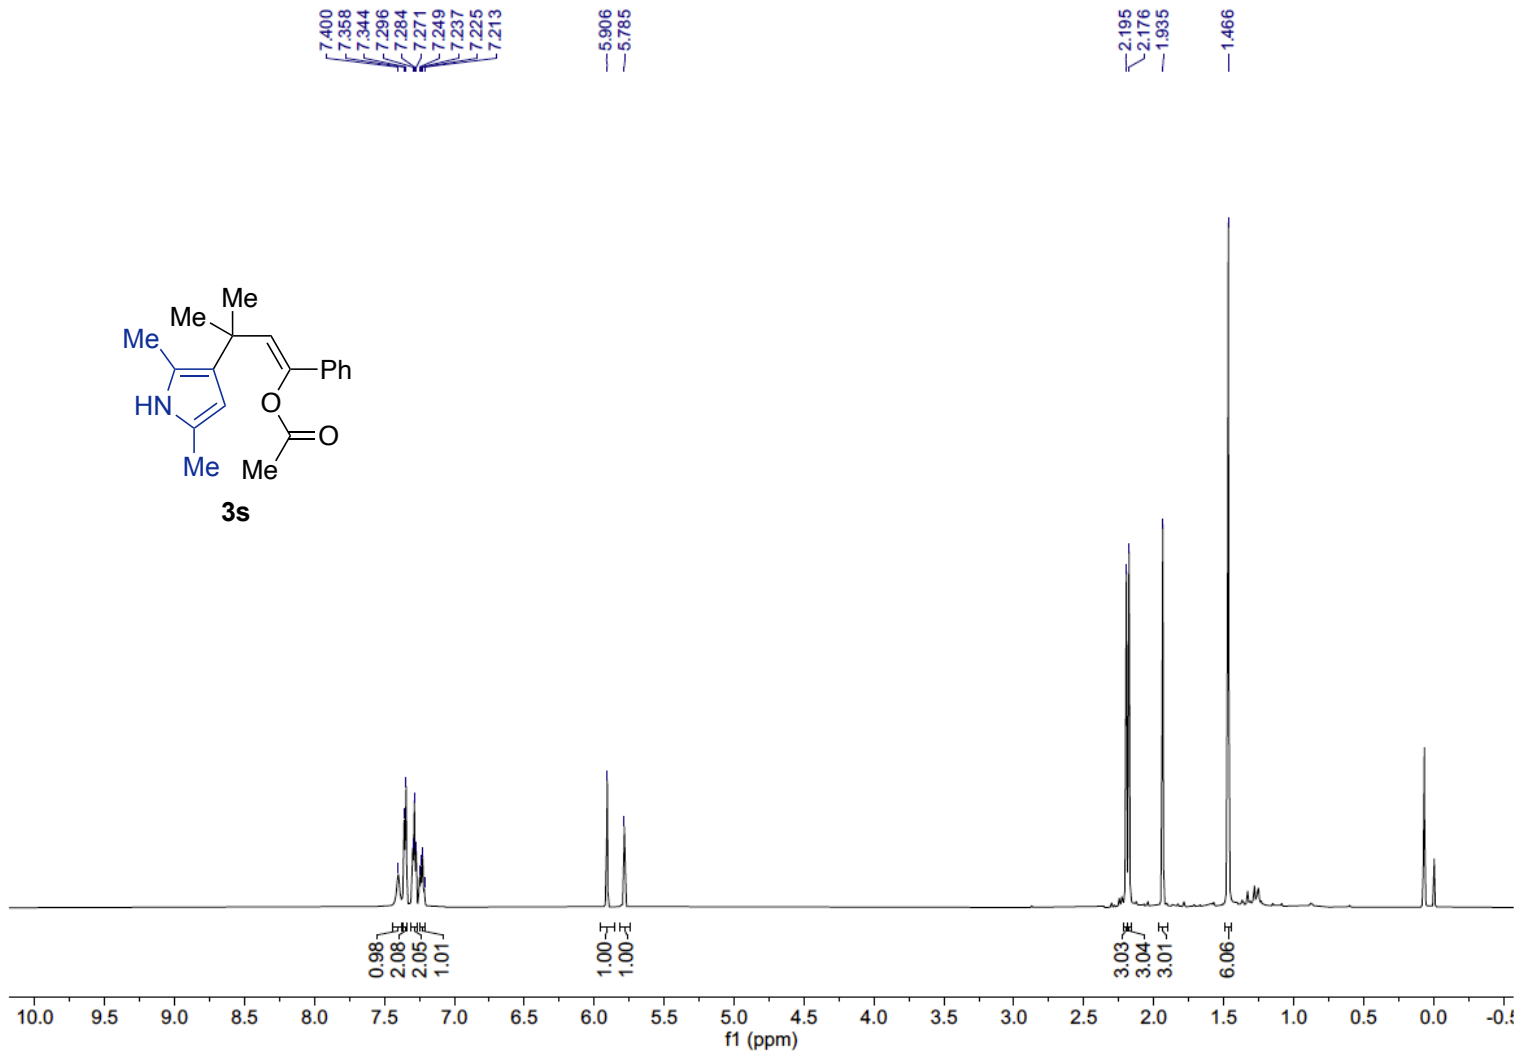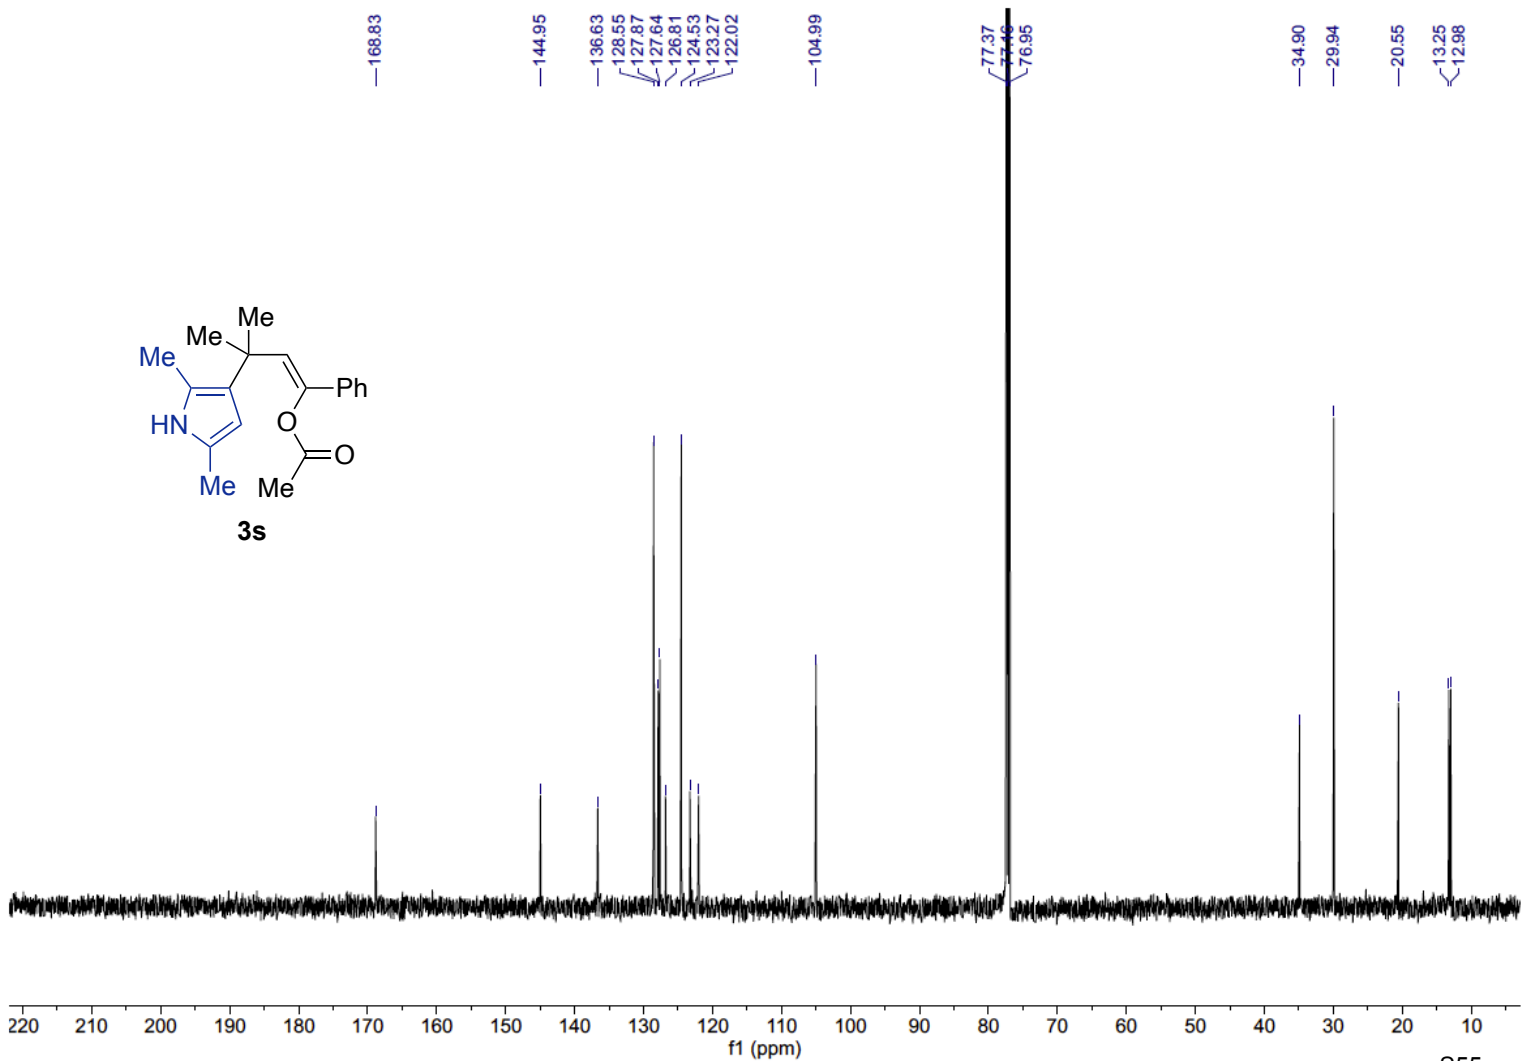

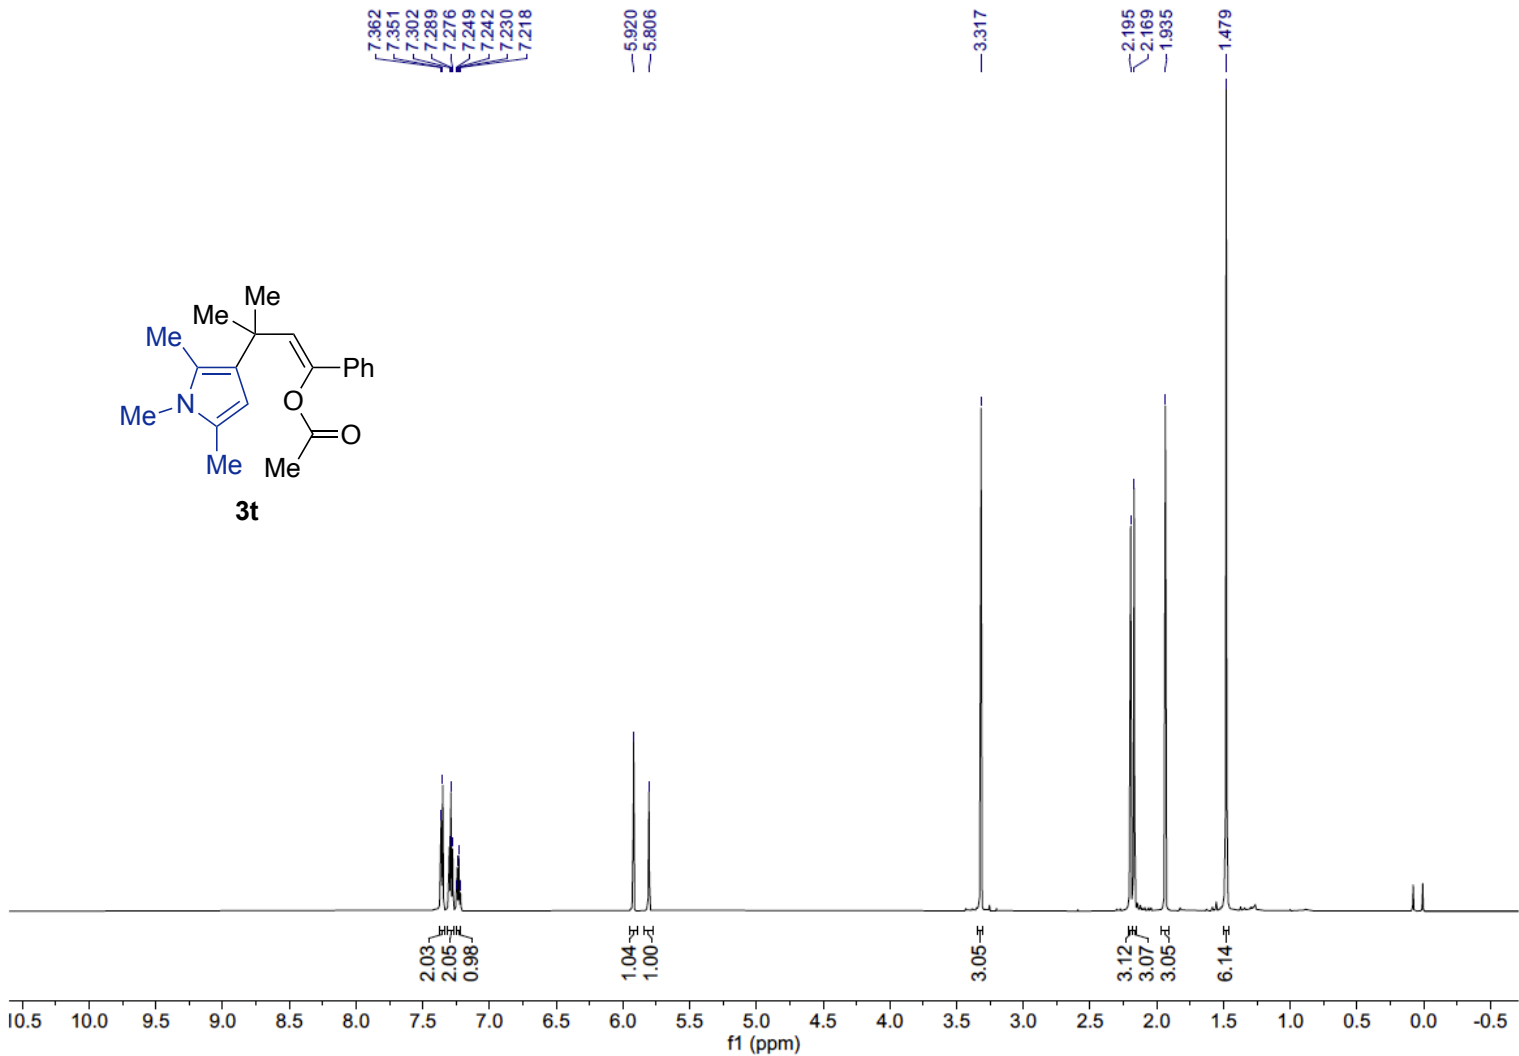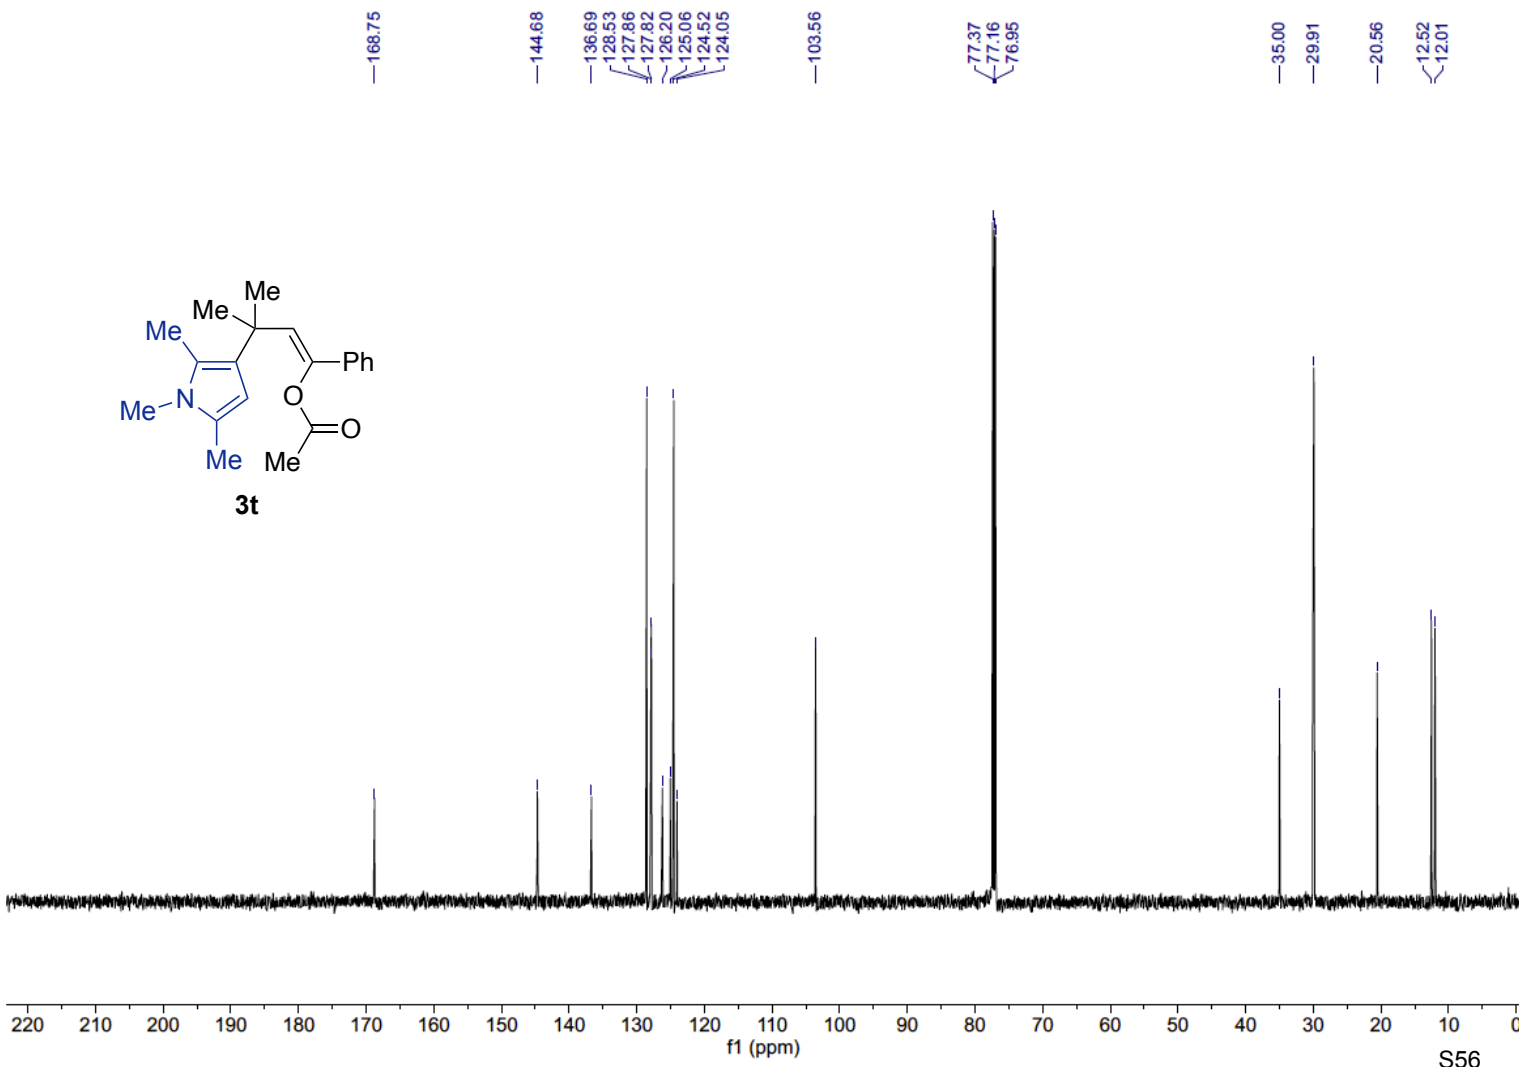



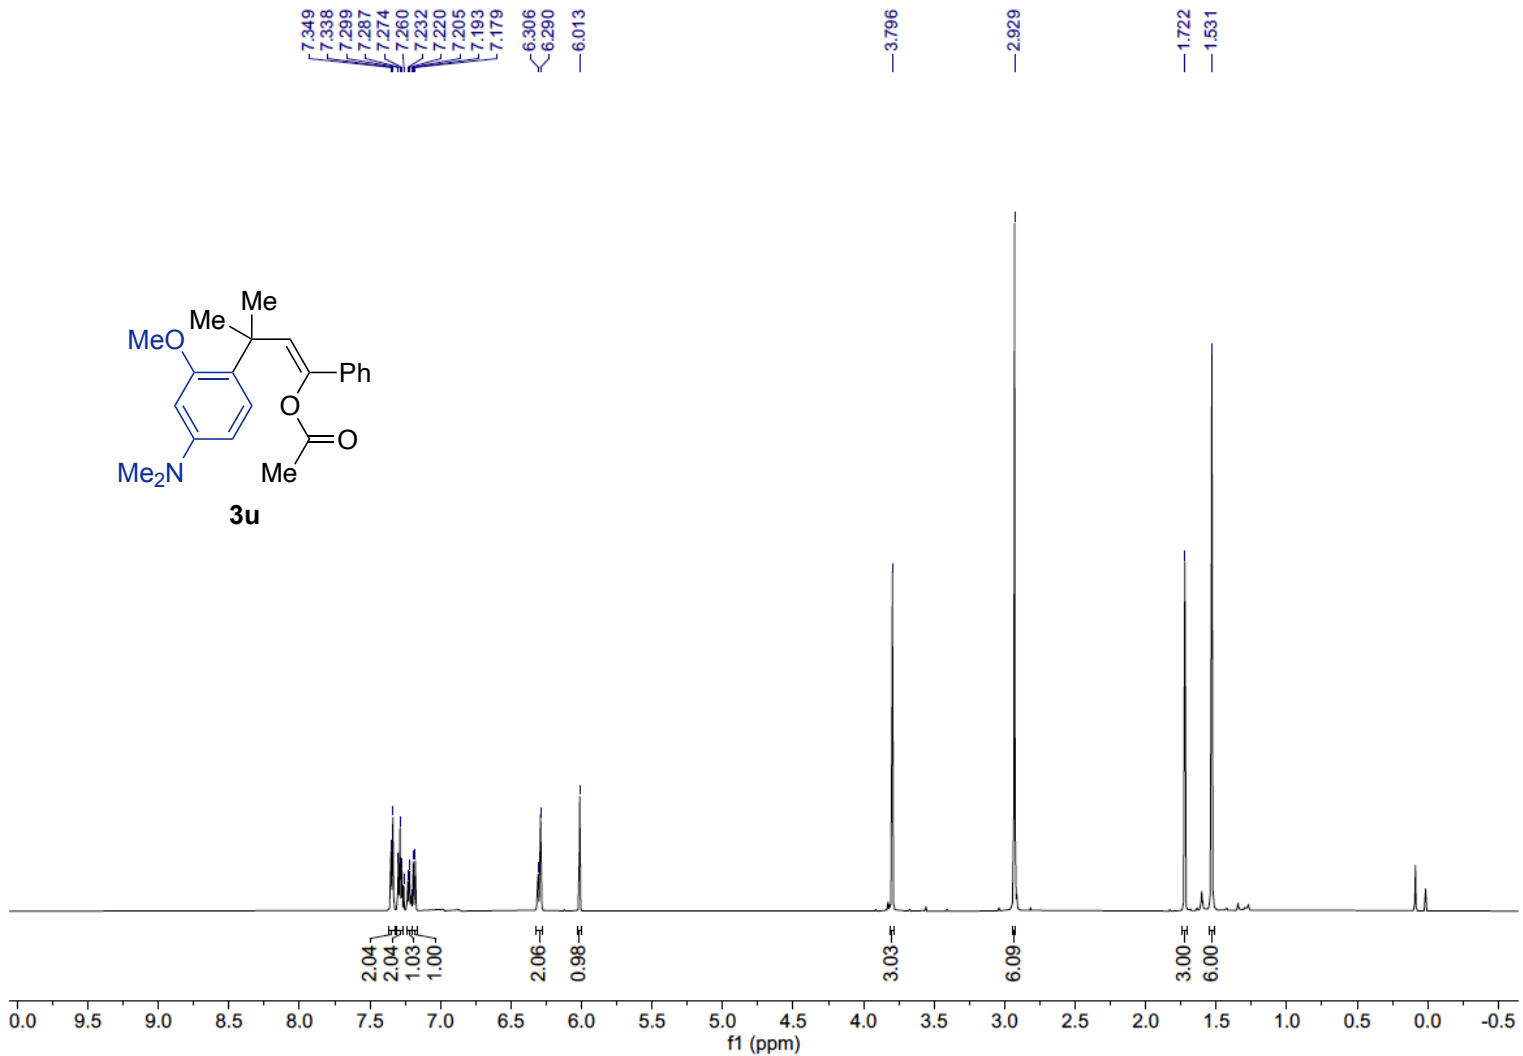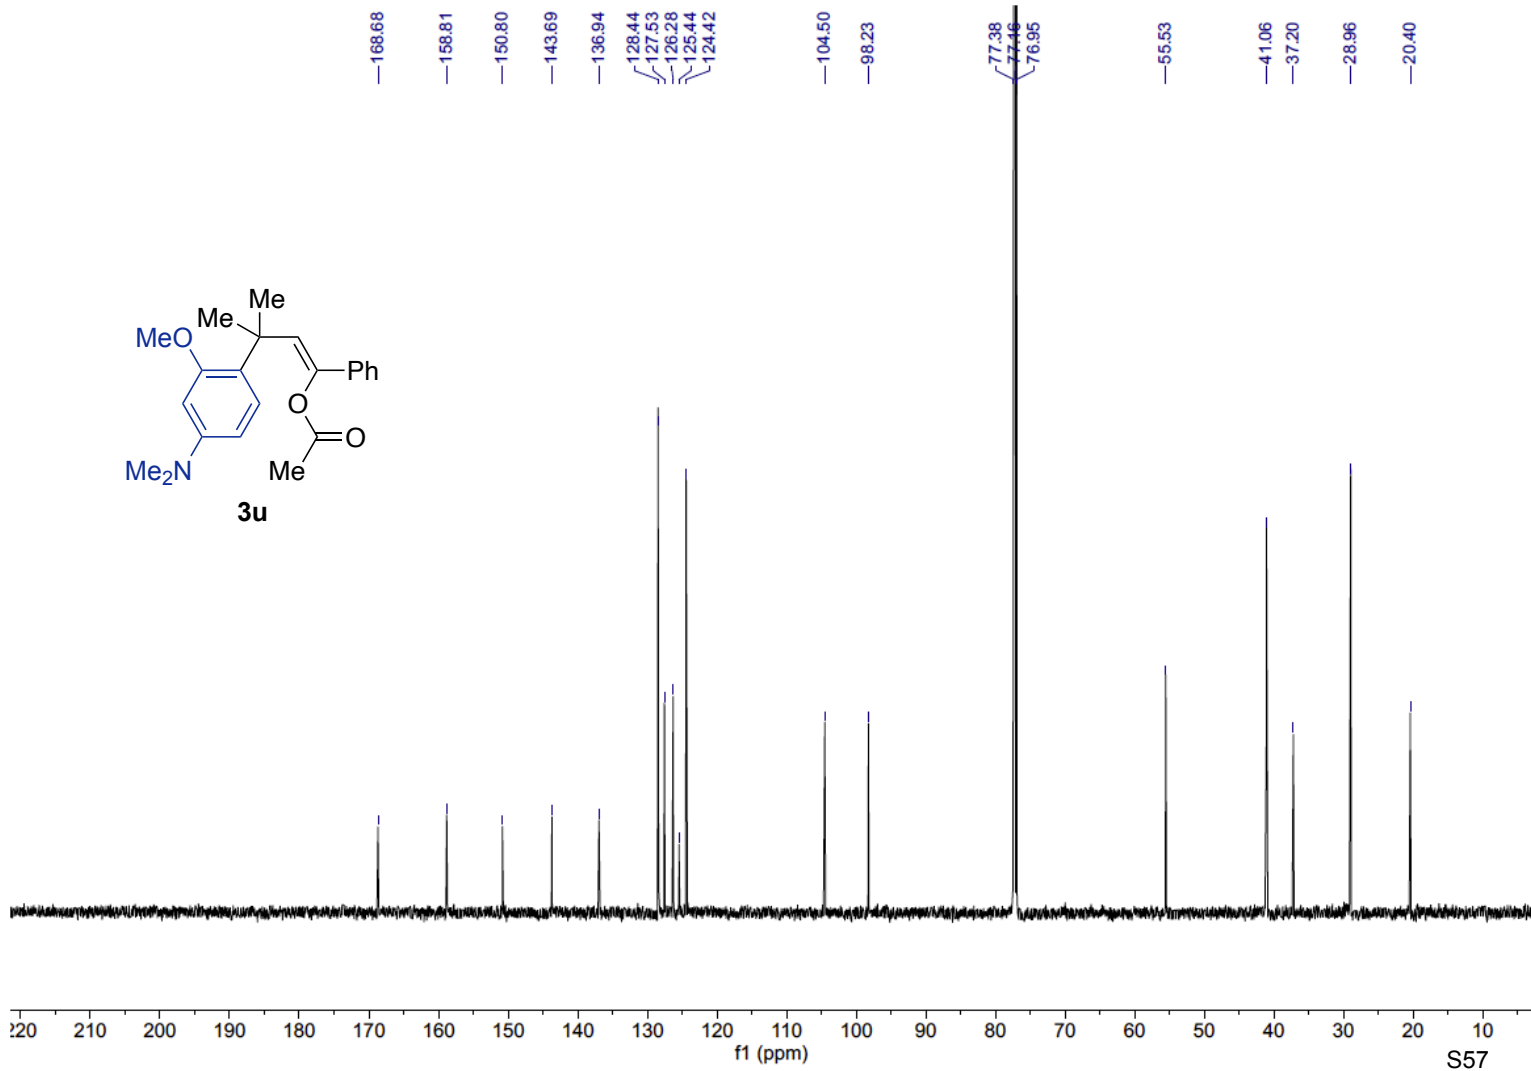

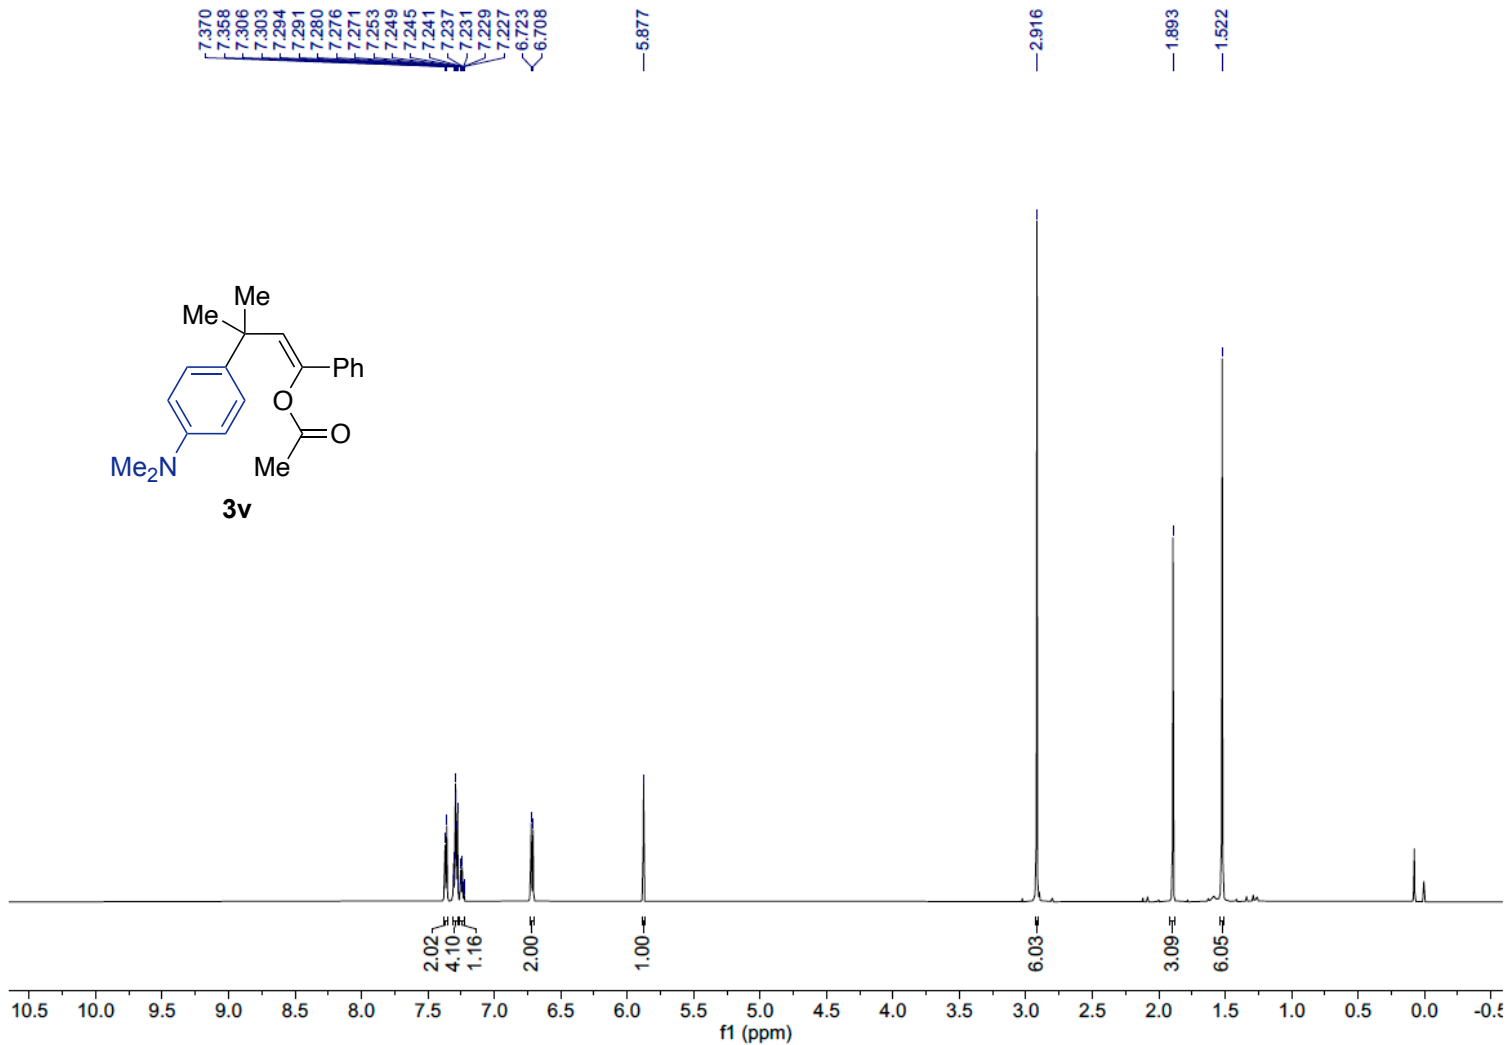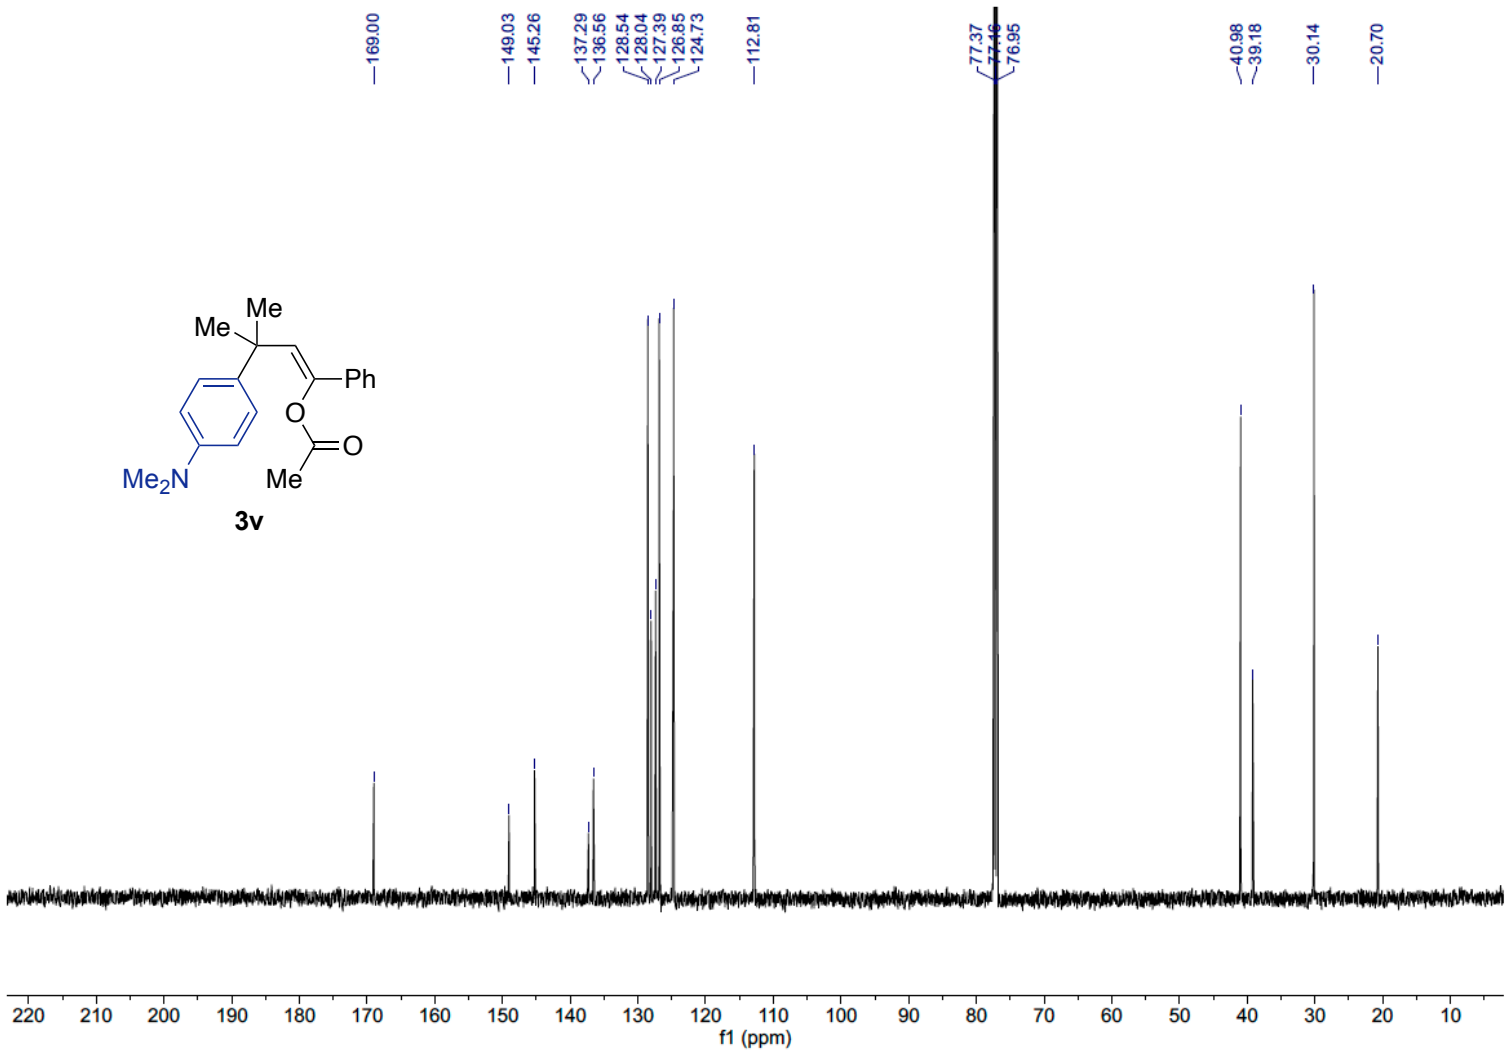

TSH-Z4 1H AV400

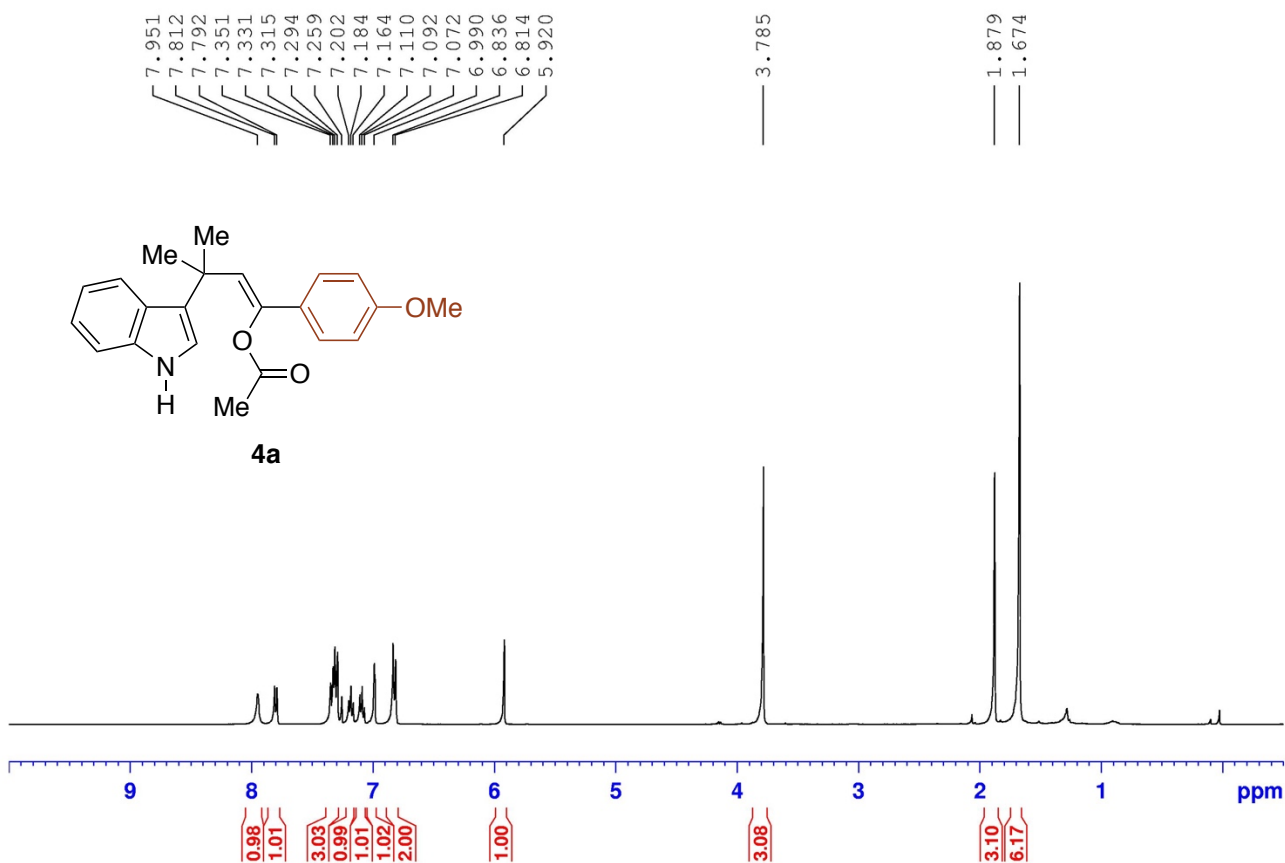

TSH-Z4 13C AV400

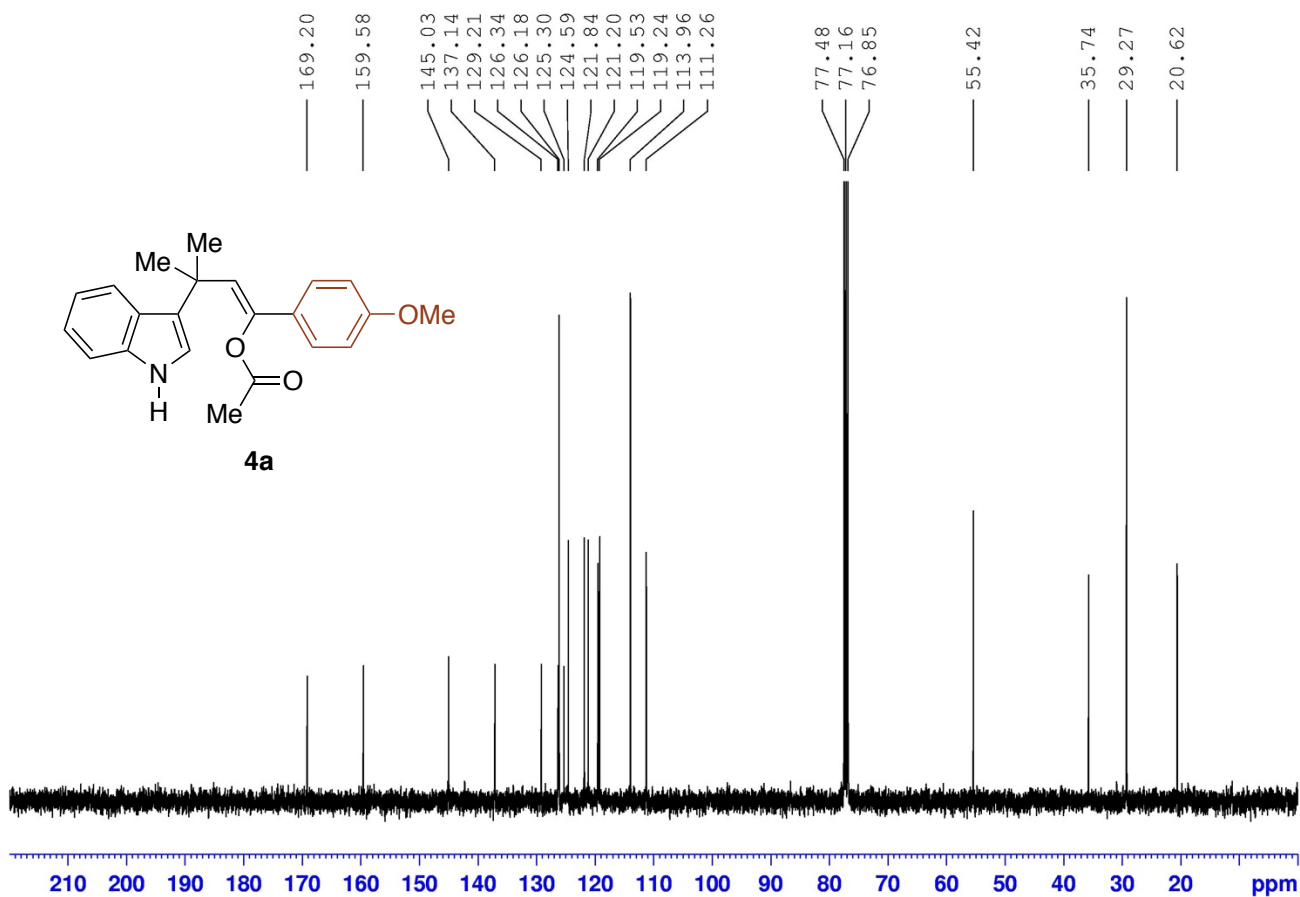

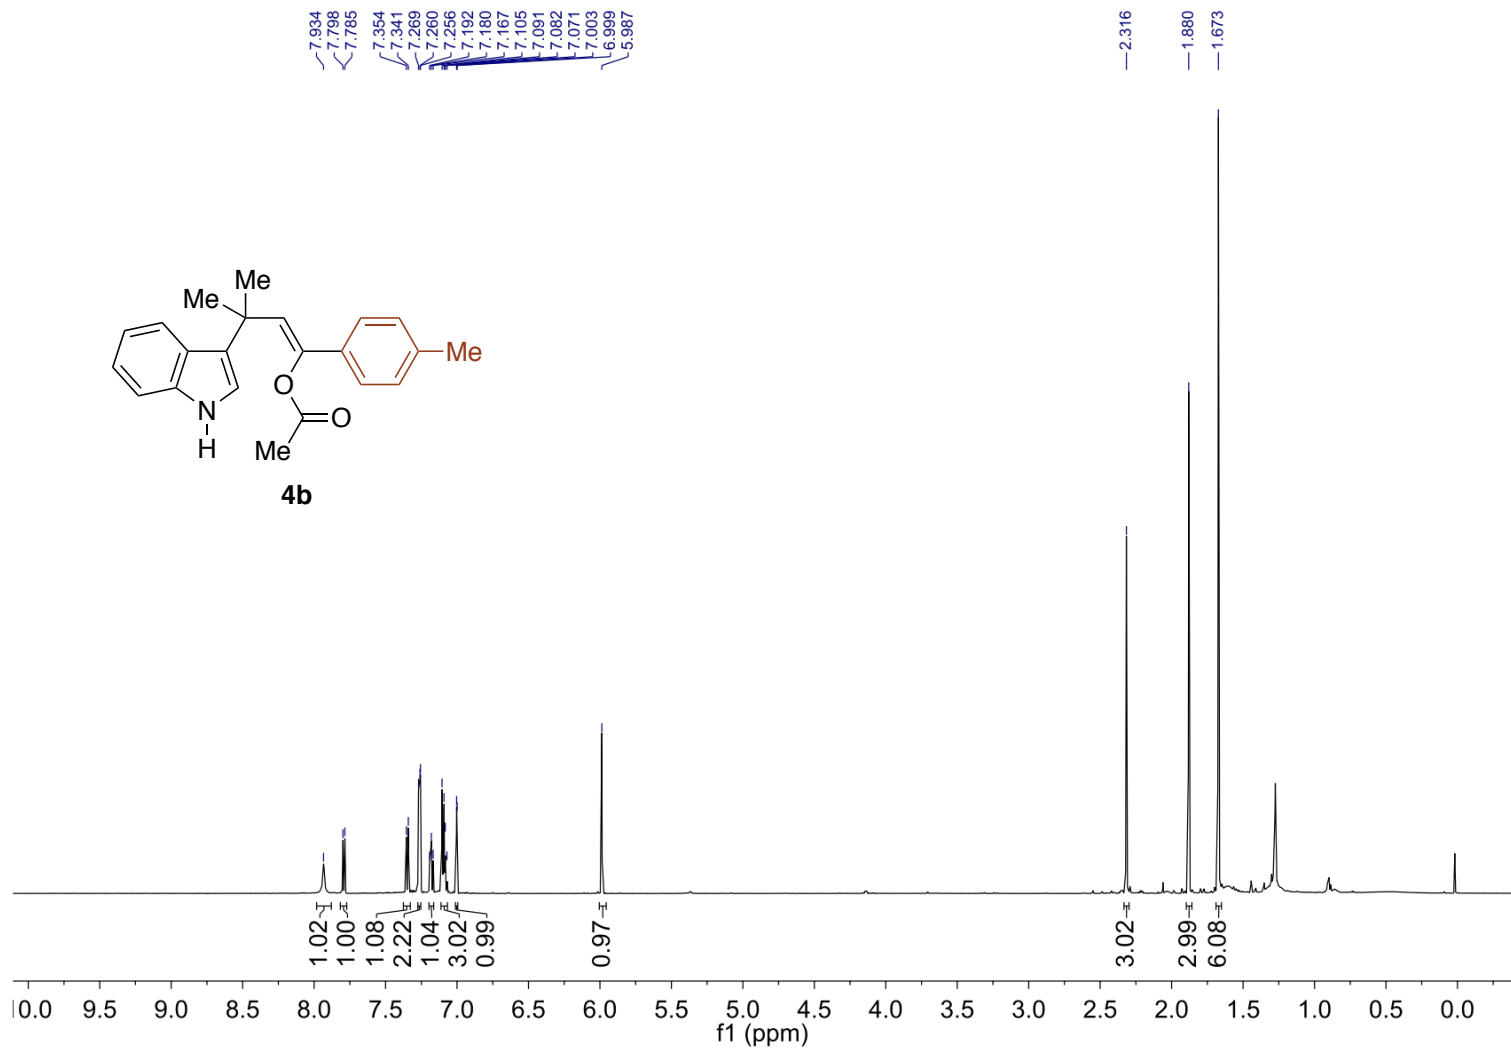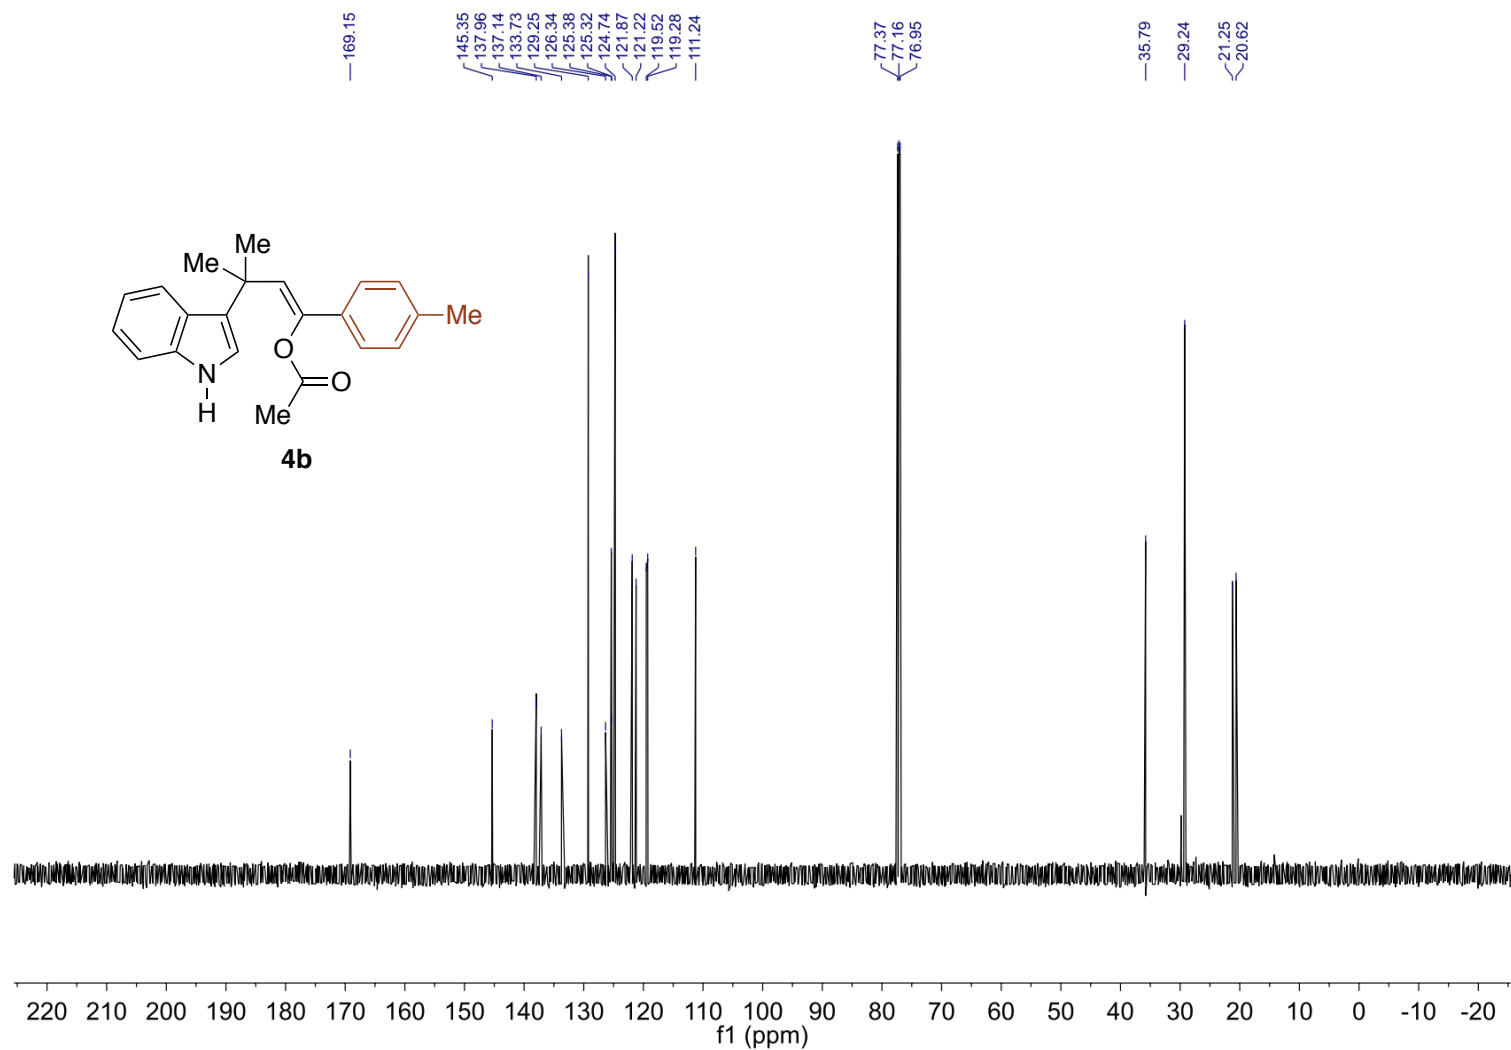

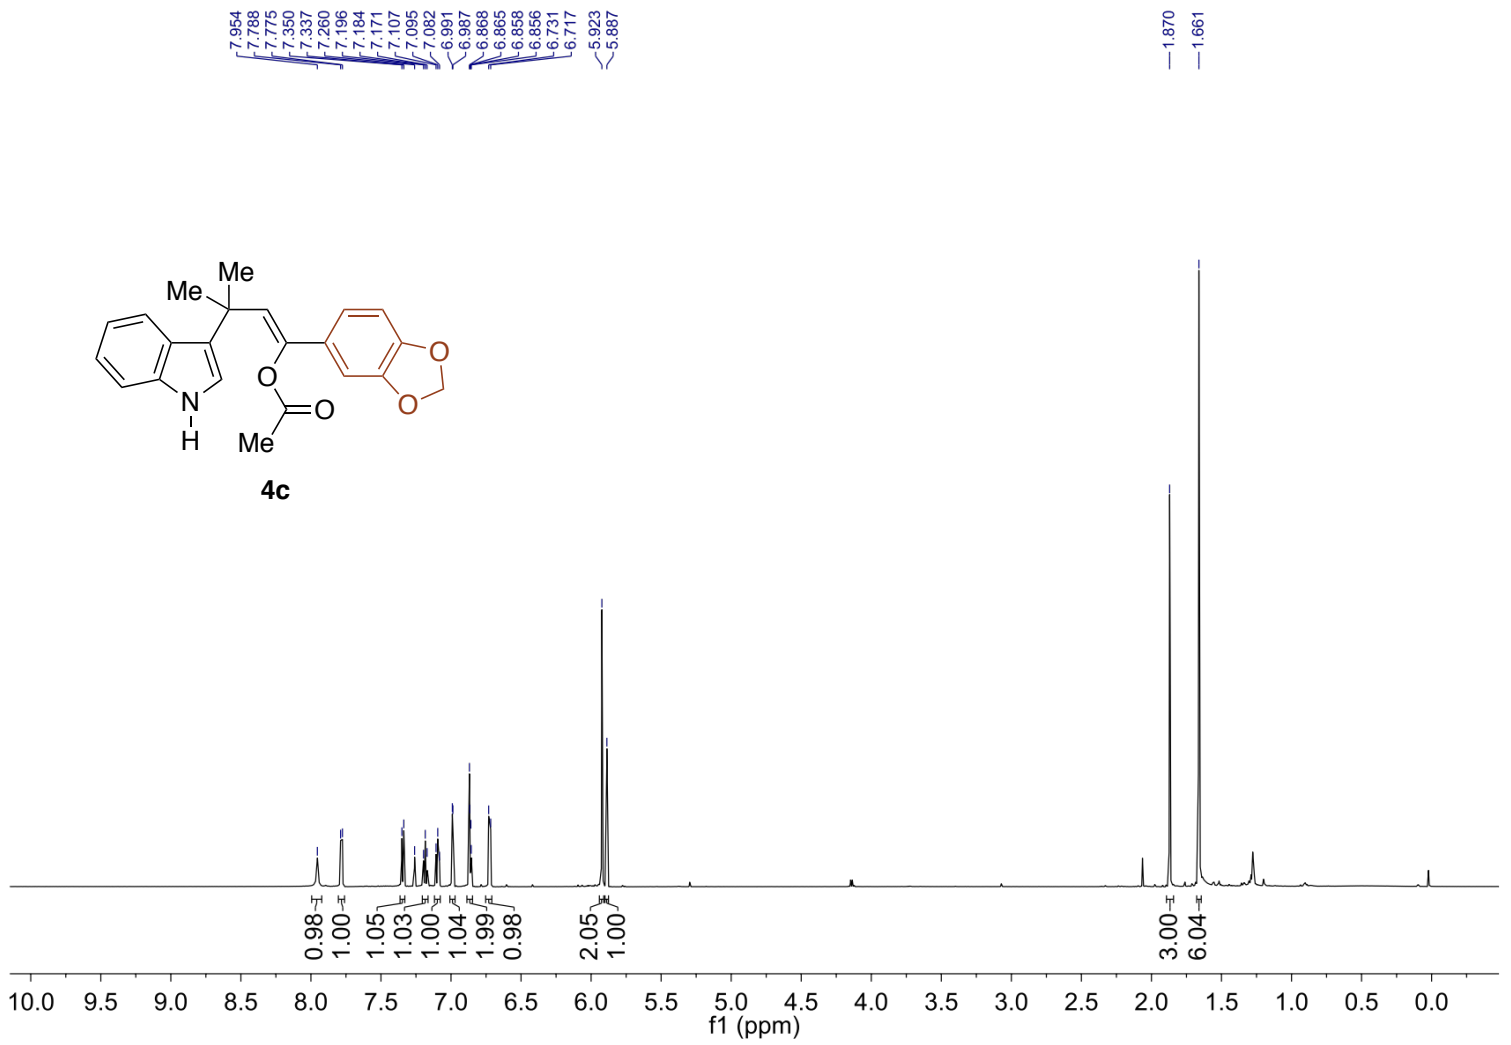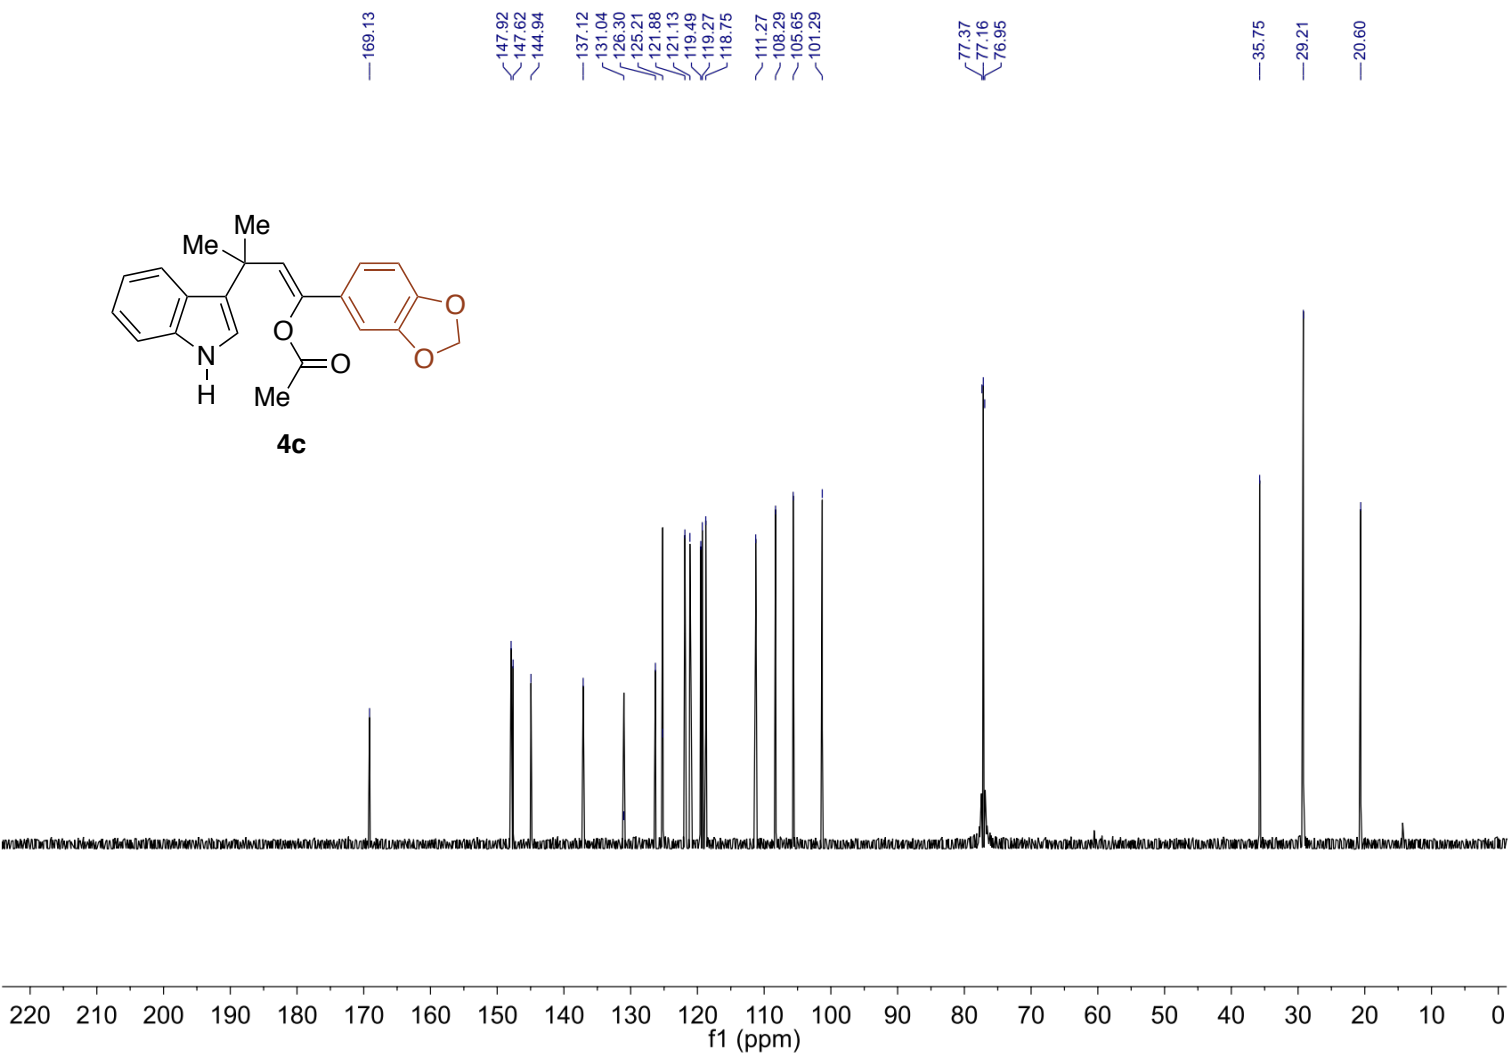

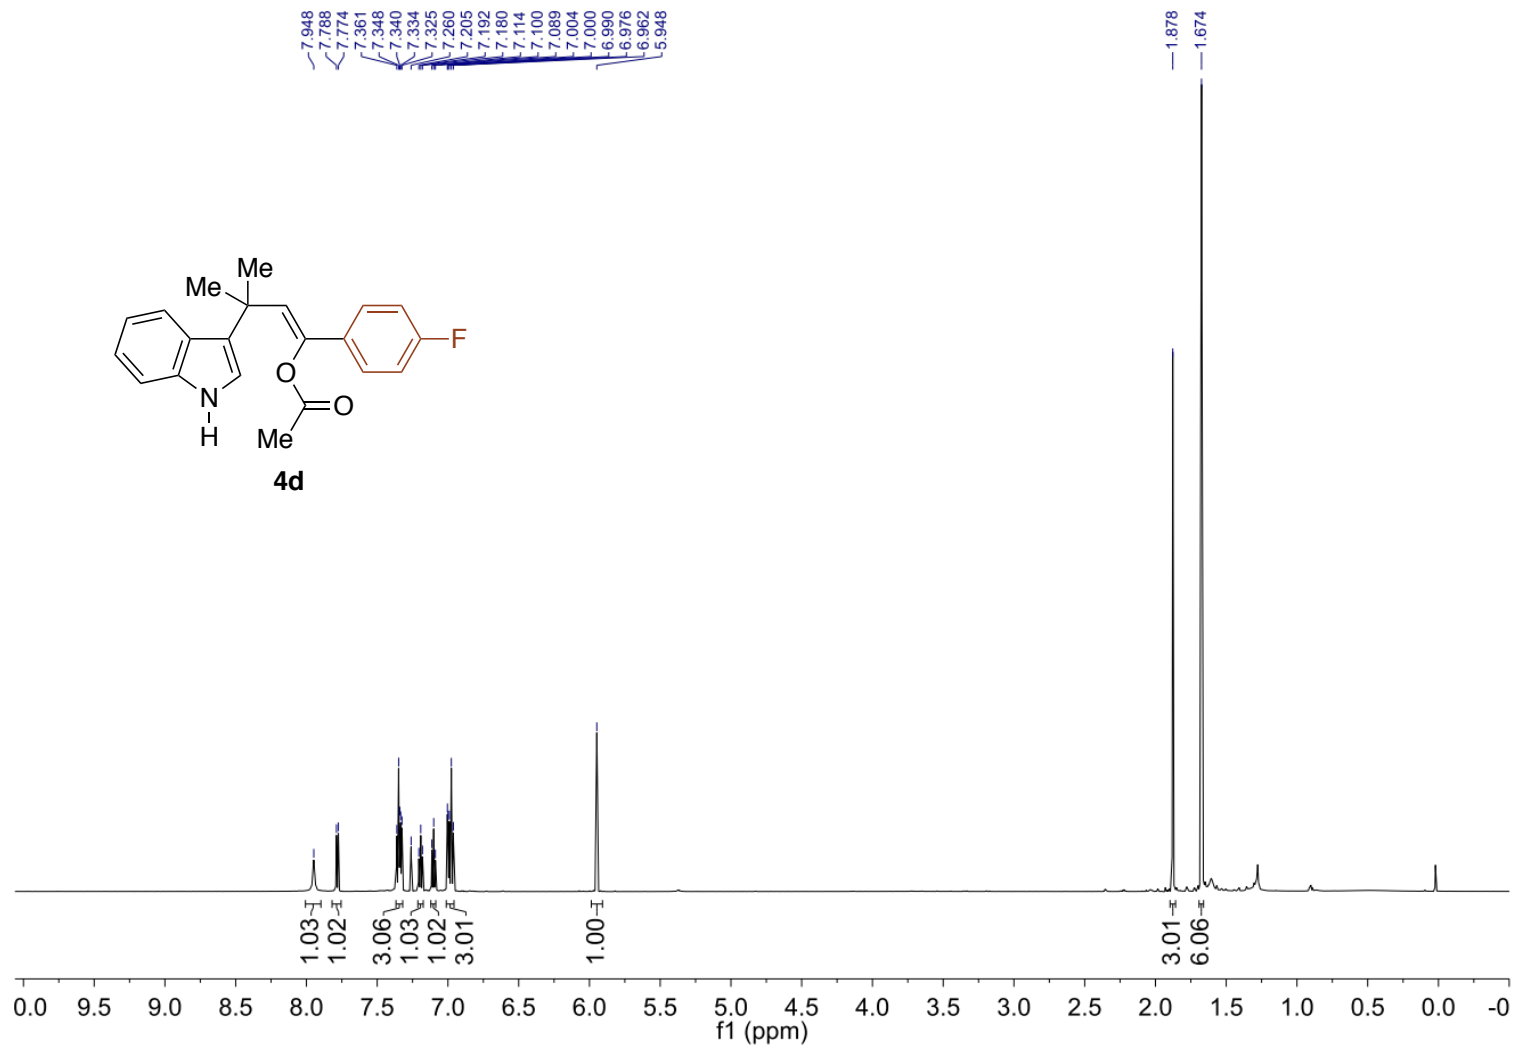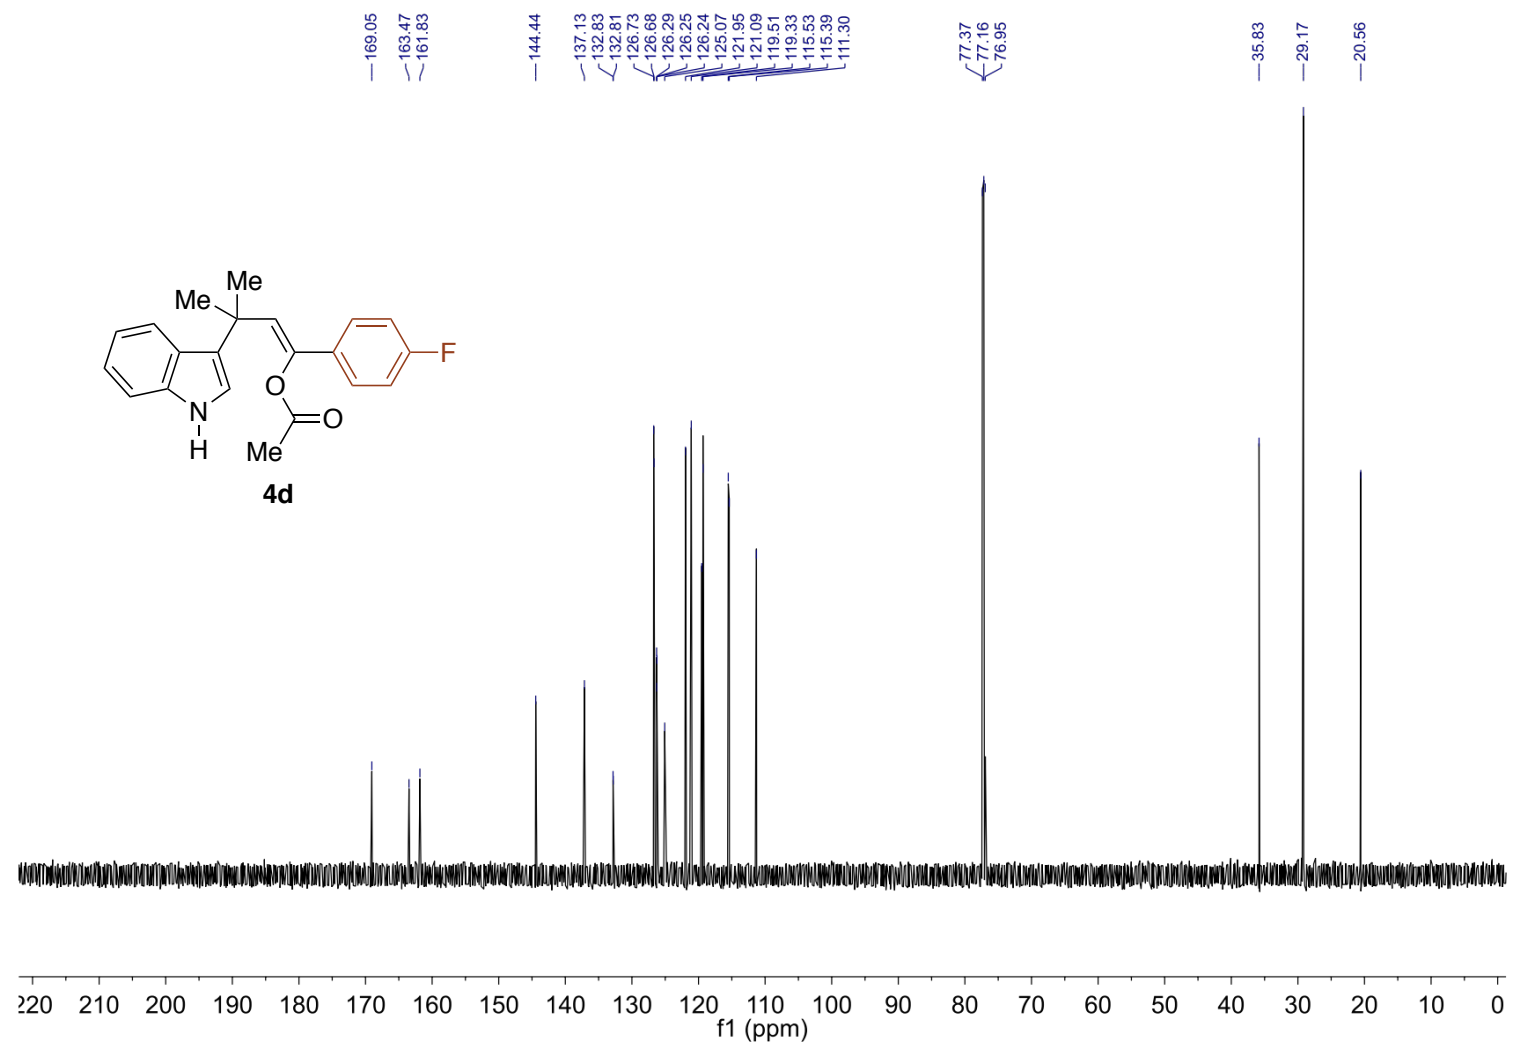

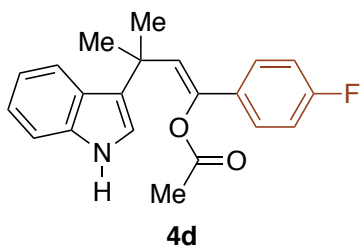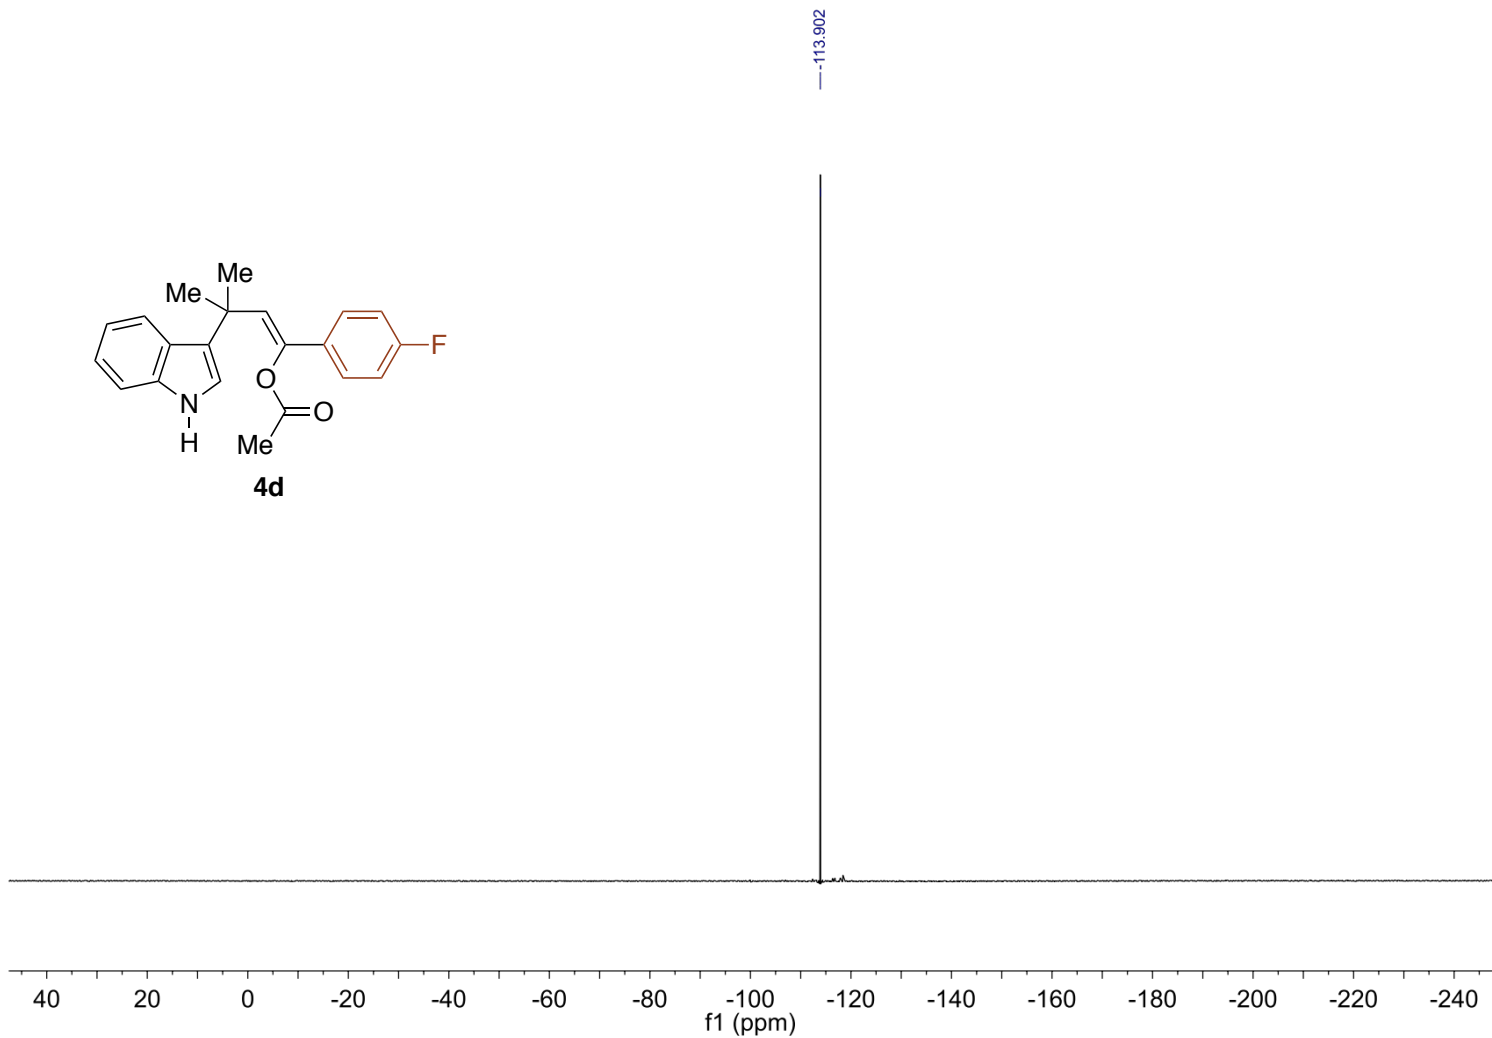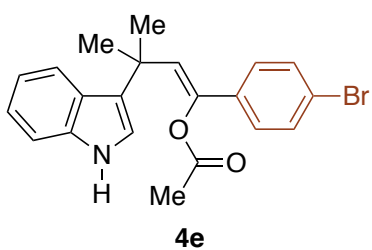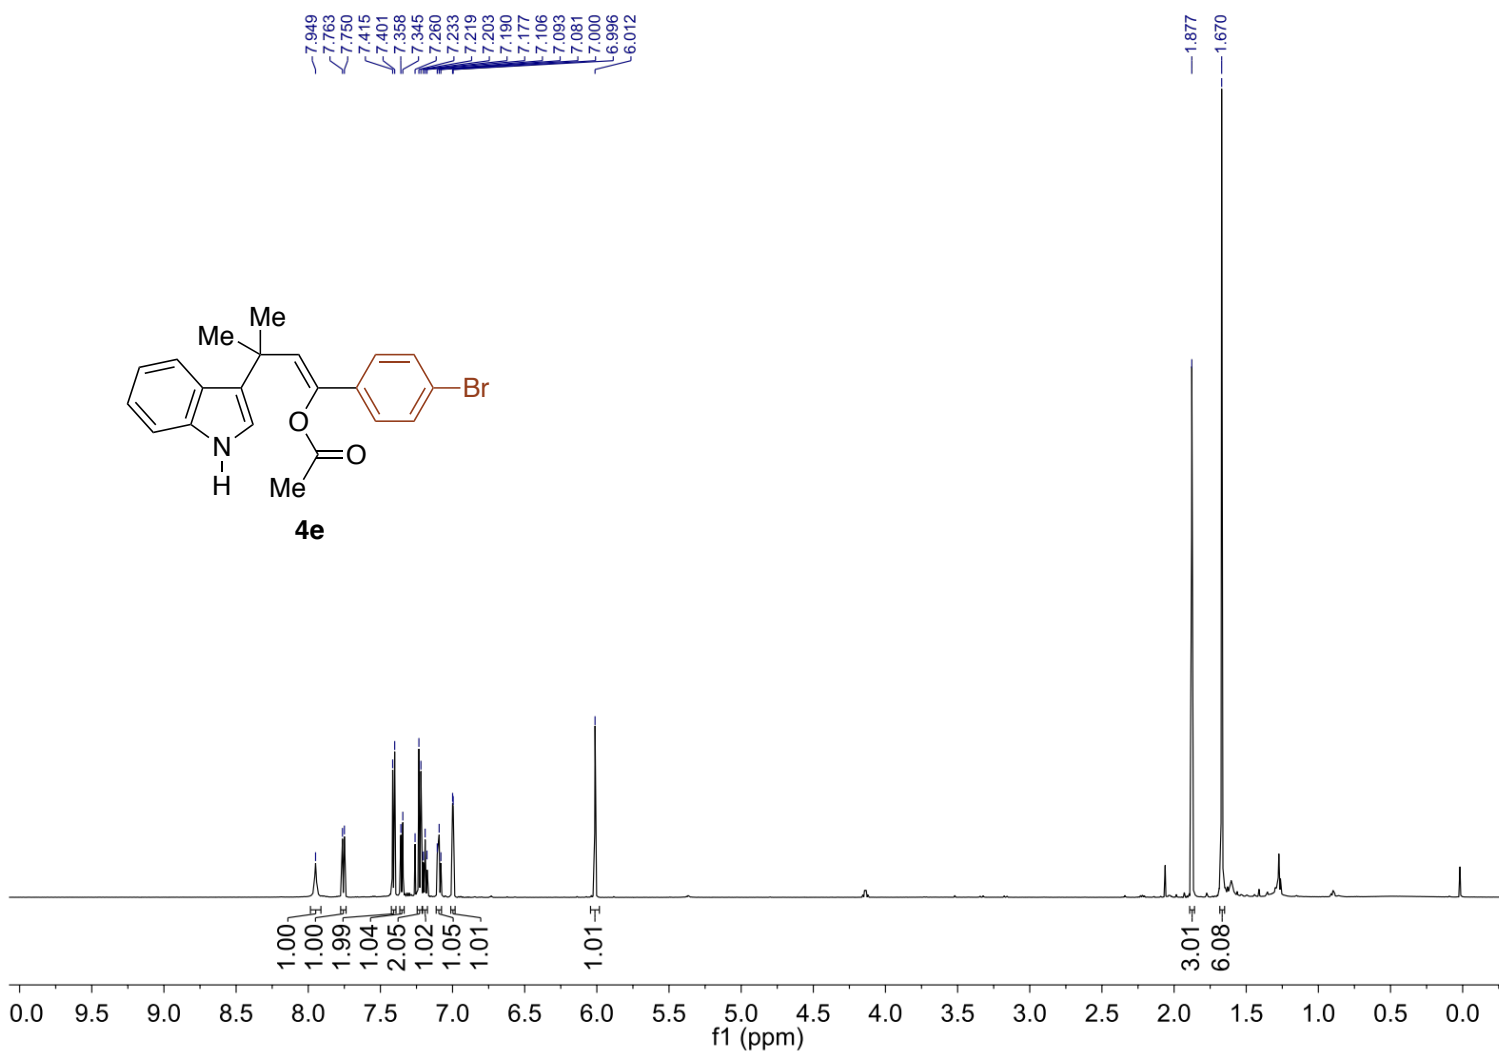

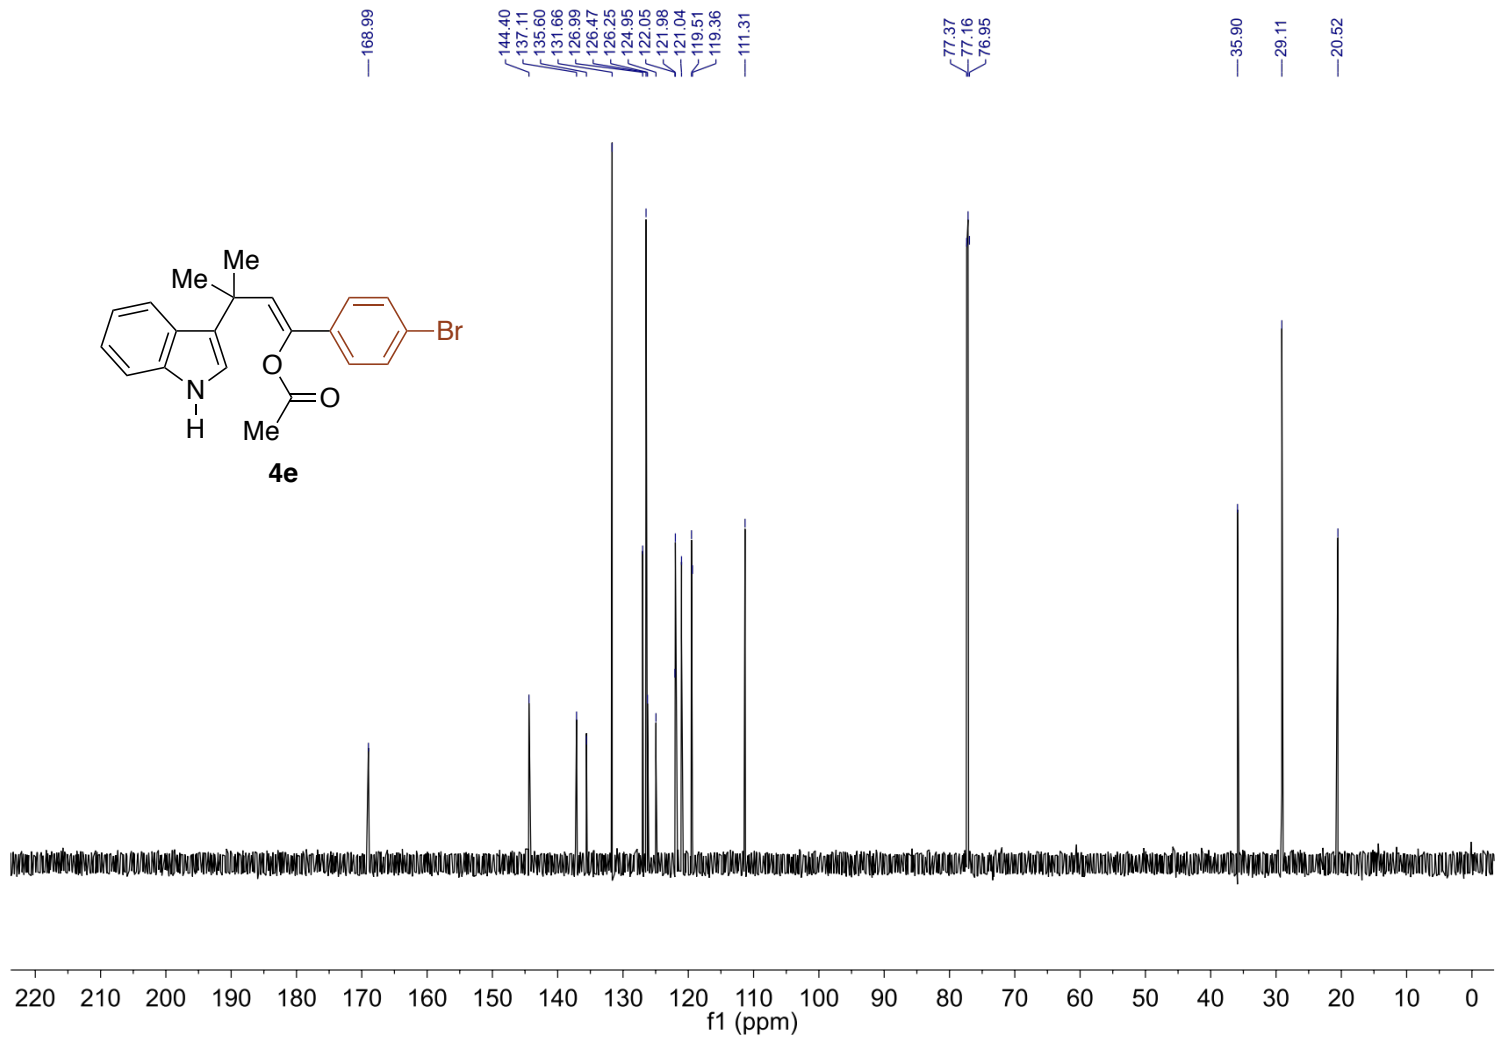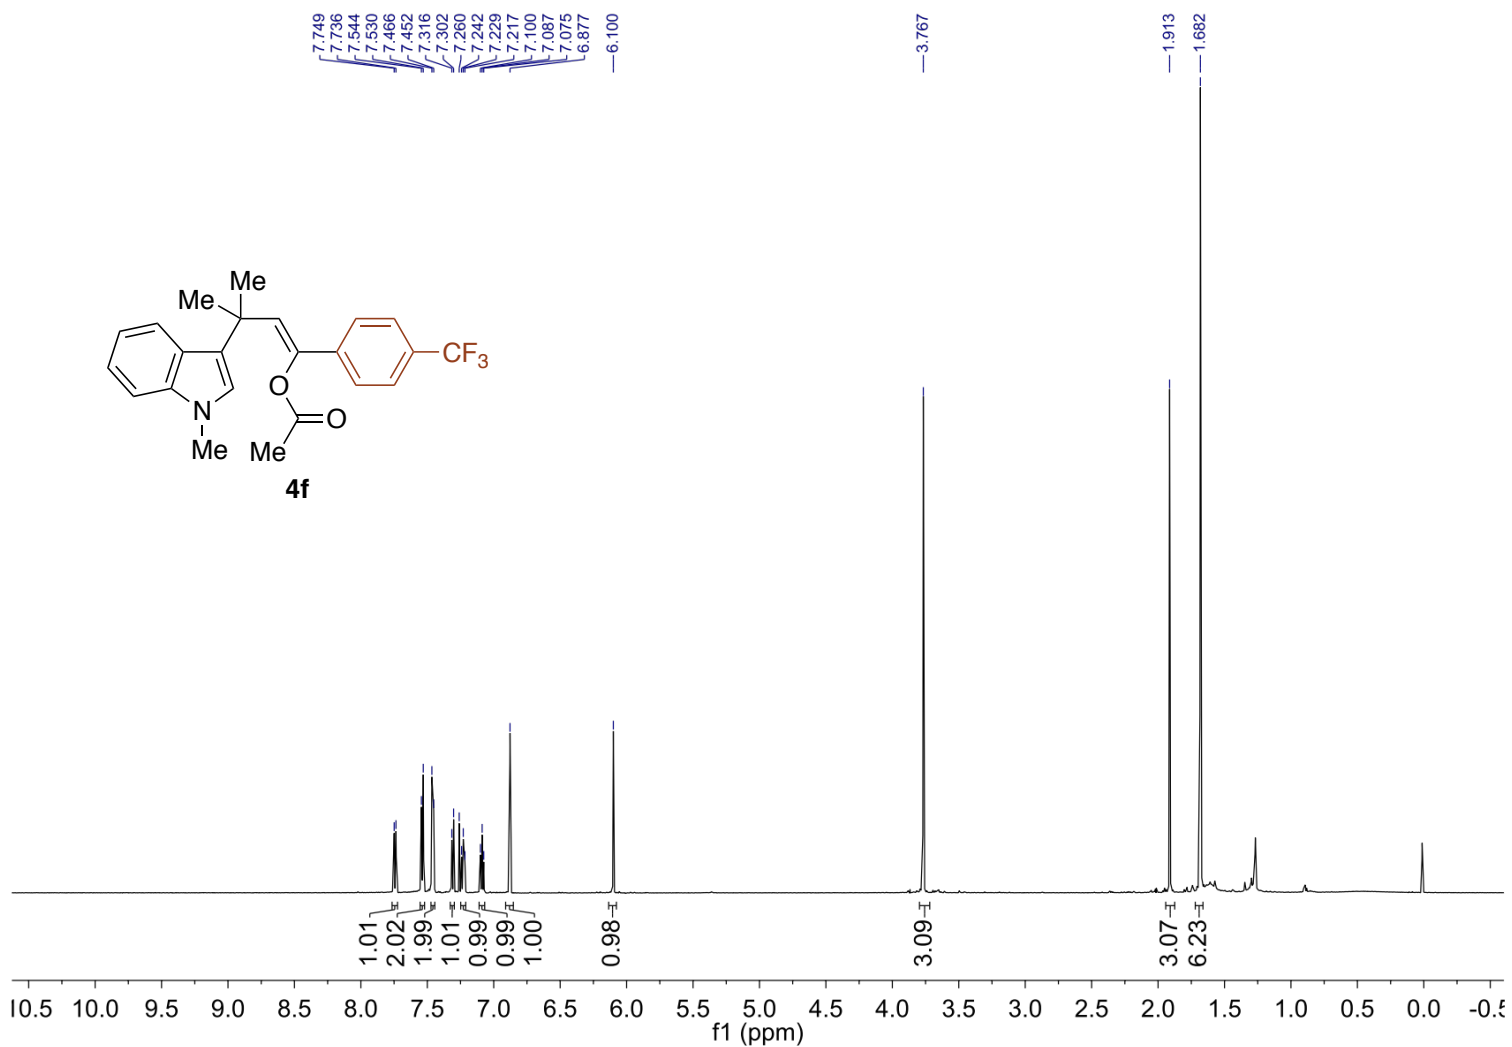



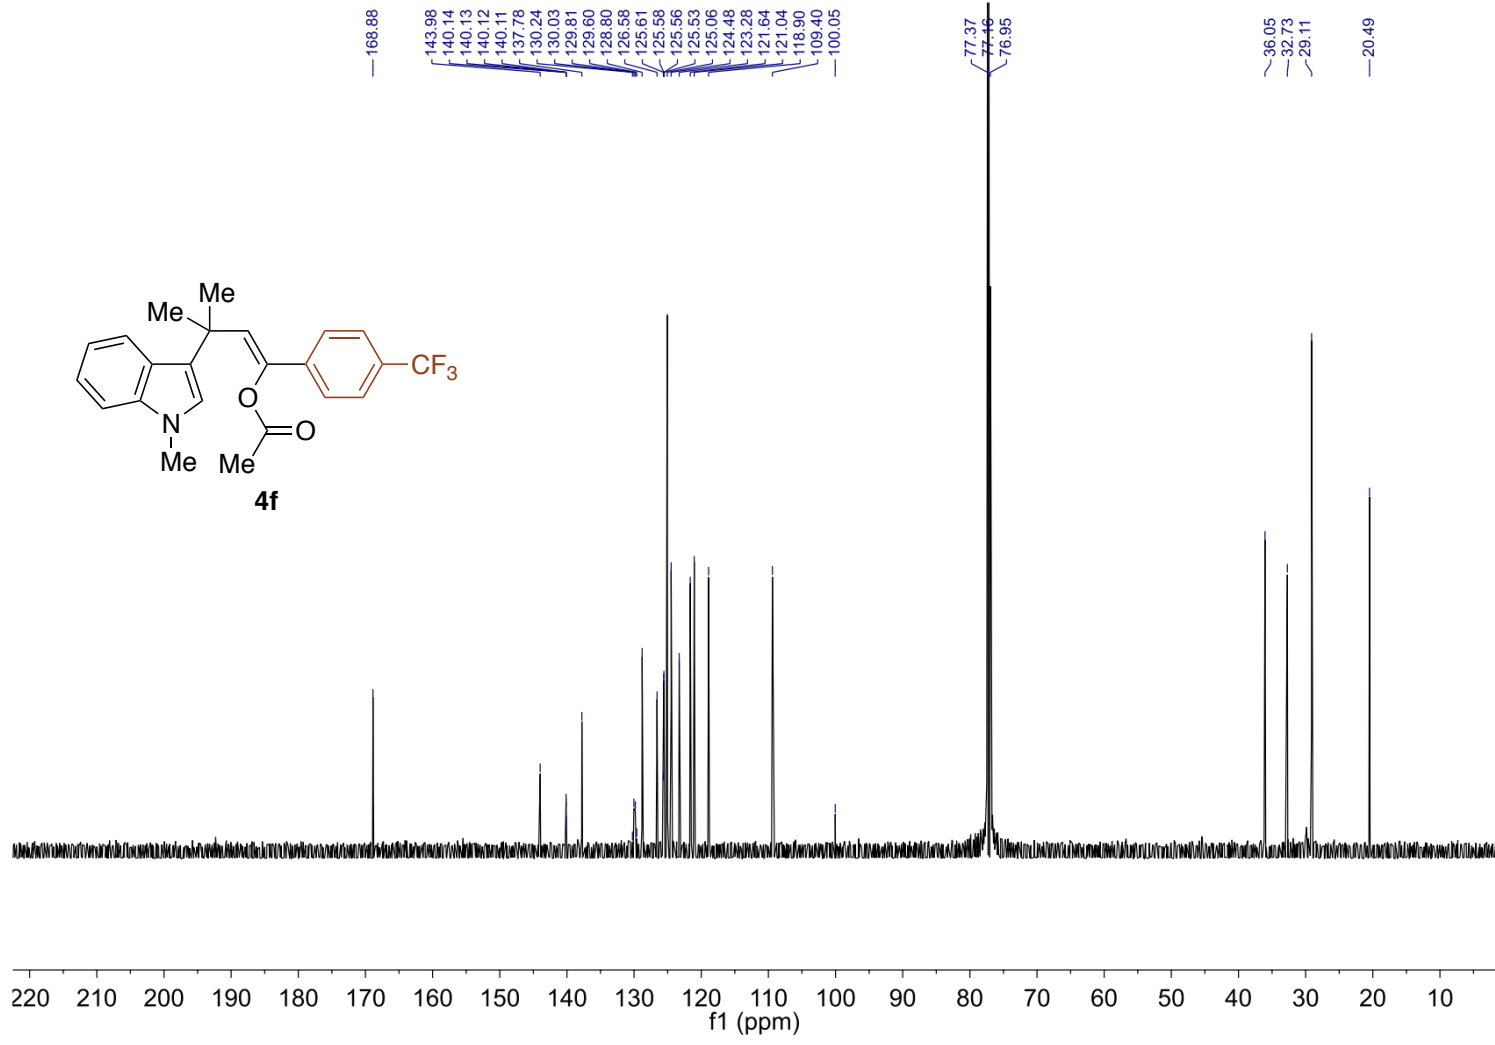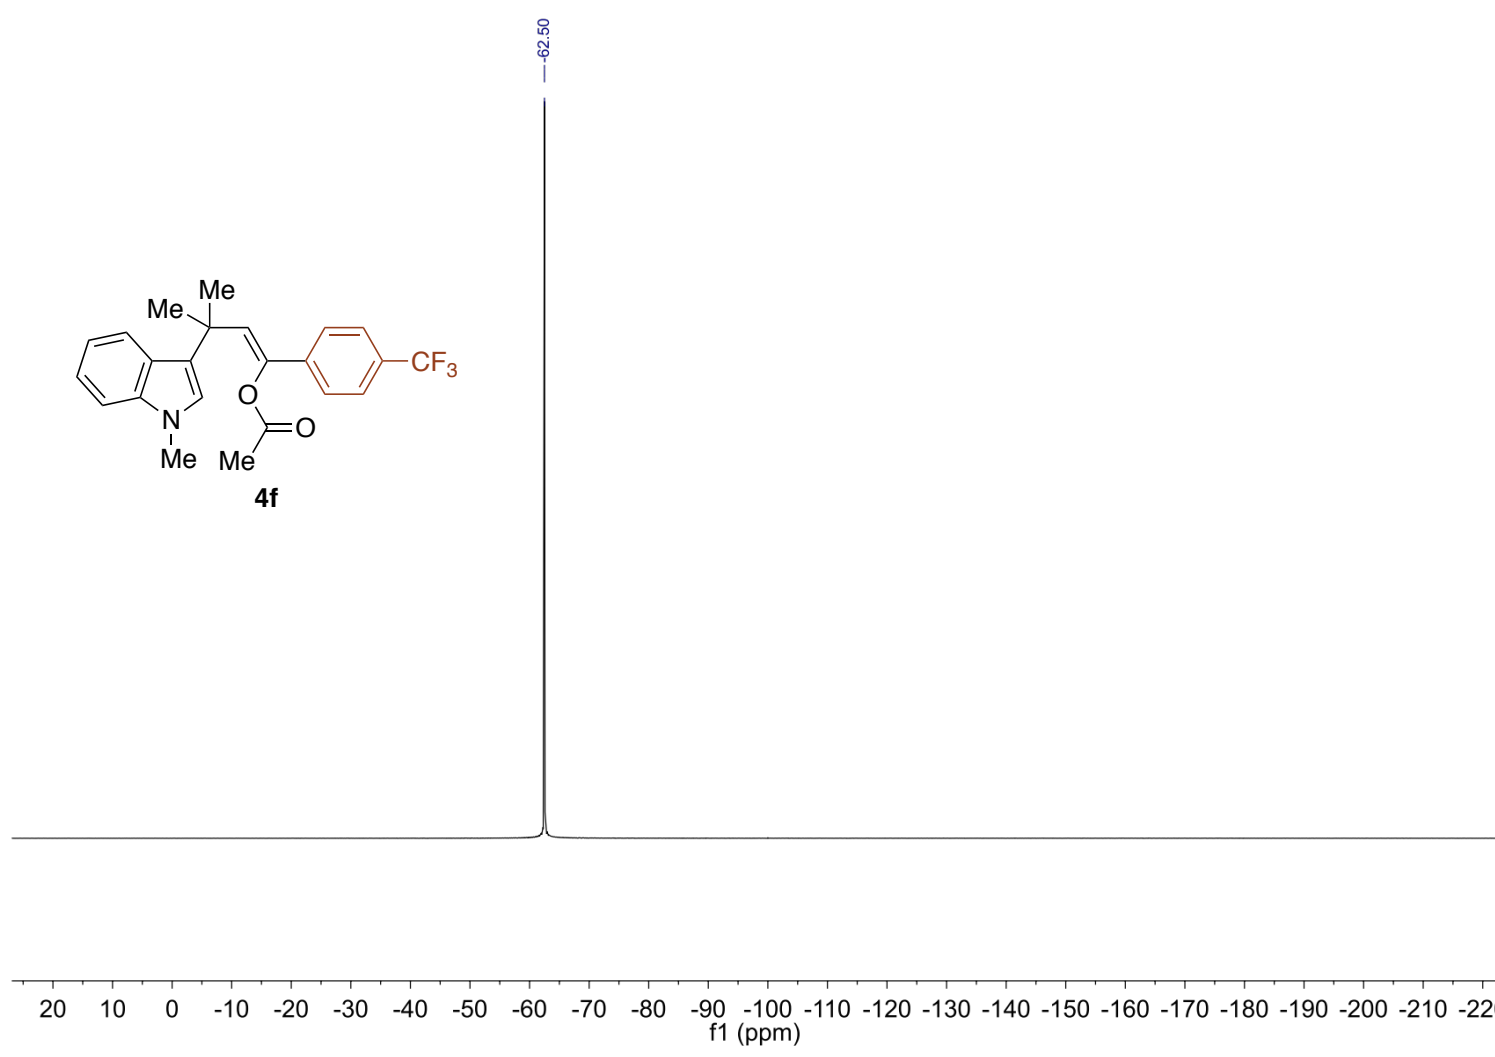

7.956  
7.942  
7.752  
7.739  
7.419  
7.405  
7.309  
7.296  
7.286  
7.236  
7.224  
7.210  
7.095  
7.082  
7.070  
6.873  
6.134

3.895  
3.762

1.906  
1.678

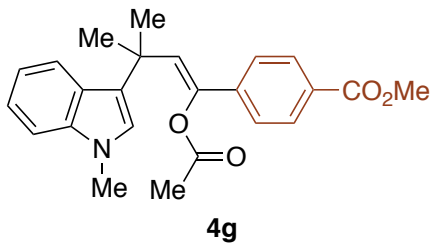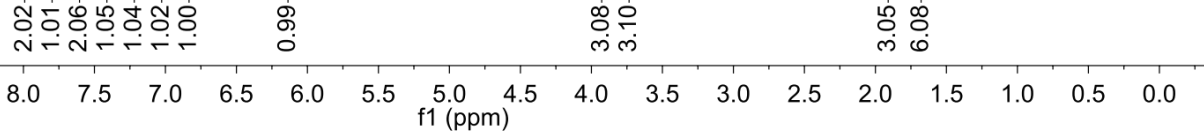

168.90  
166.83  
144.29  
140.92  
137.77  
129.92  
129.50  
128.78  
126.60  
124.65  
124.51  
123.30  
121.61  
121.09  
118.88  
109.37

77.37  
77.46  
76.95  
52.23  
36.07  
32.72  
29.13  
20.49

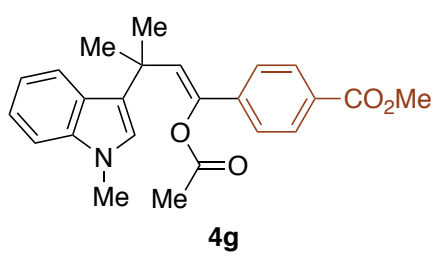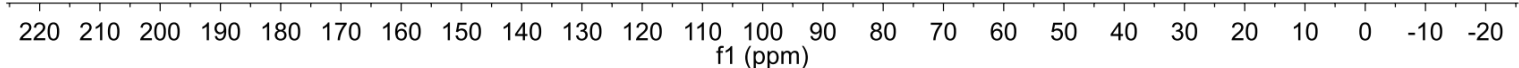

7.771  
7.766  
7.759  
7.757  
7.752  
7.741  
7.727  
7.582  
7.570  
7.557  
7.474  
7.465  
7.461  
7.309  
7.295  
7.249  
7.236  
7.223  
7.211  
7.102  
7.099  
7.077  
6.881  
6.171

3.760

1.920

1.690

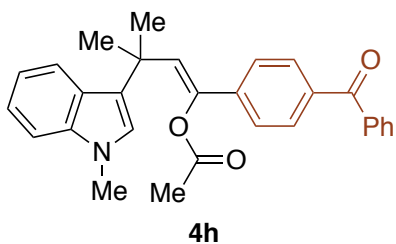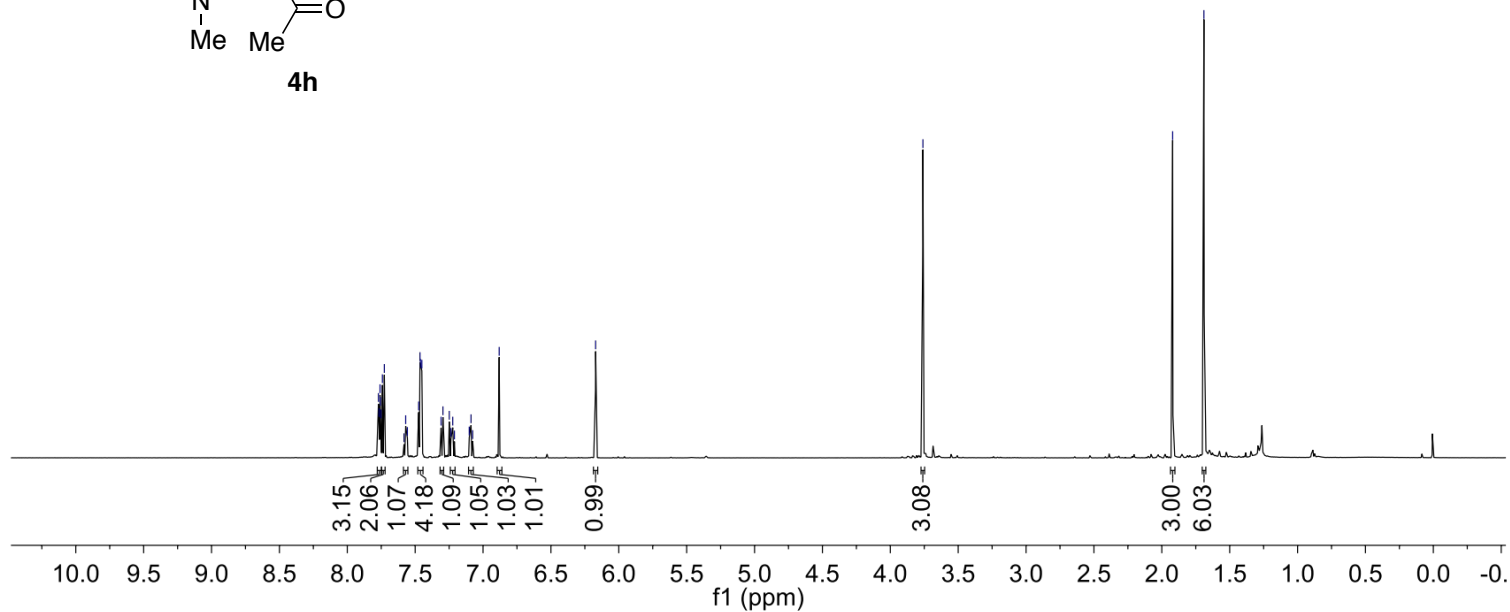

196.13

168.92

144.27

140.45

137.77

137.74

136.84

132.48

130.50

130.08

128.91

128.38

126.59

124.54

124.48

123.29

121.60

121.06

118.87

109.37

77.37

77.16

76.95

36.09

32.71

29.13

20.49

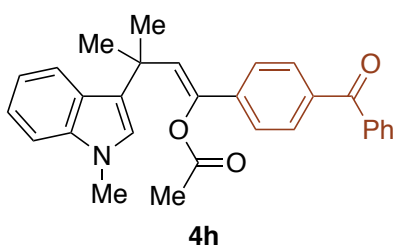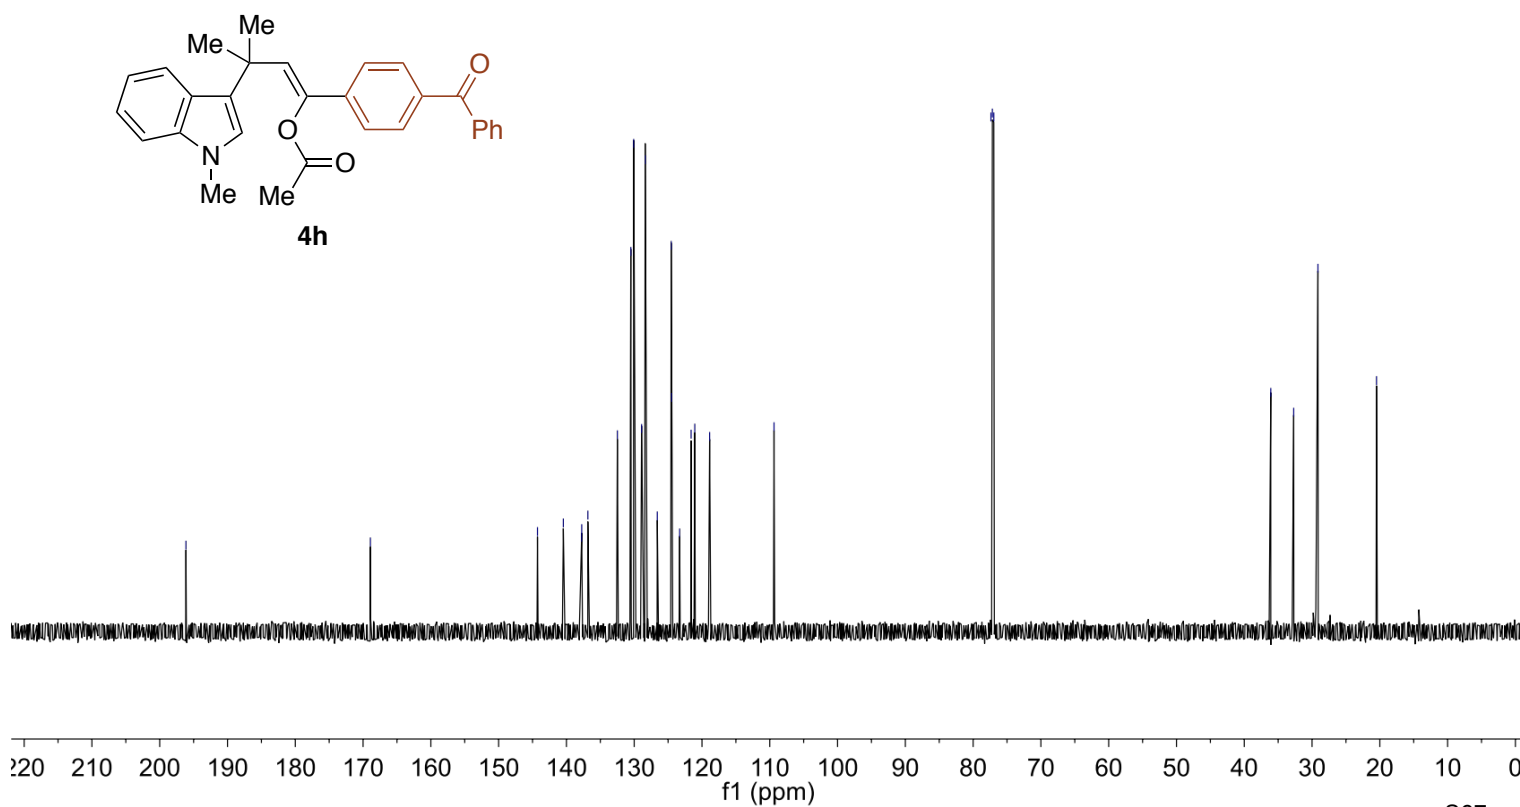

7.959  
7.781  
7.767  
7.357  
7.343  
7.260  
7.235  
7.230  
7.227  
7.222  
7.197  
7.184  
7.172  
7.122  
7.120  
7.113  
7.111  
7.100  
7.087  
7.075  
7.058  
7.056  
7.053  
7.051  
6.996  
6.992  
5.995

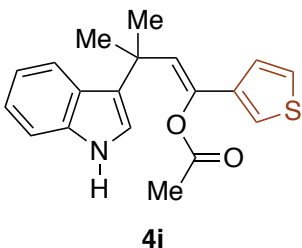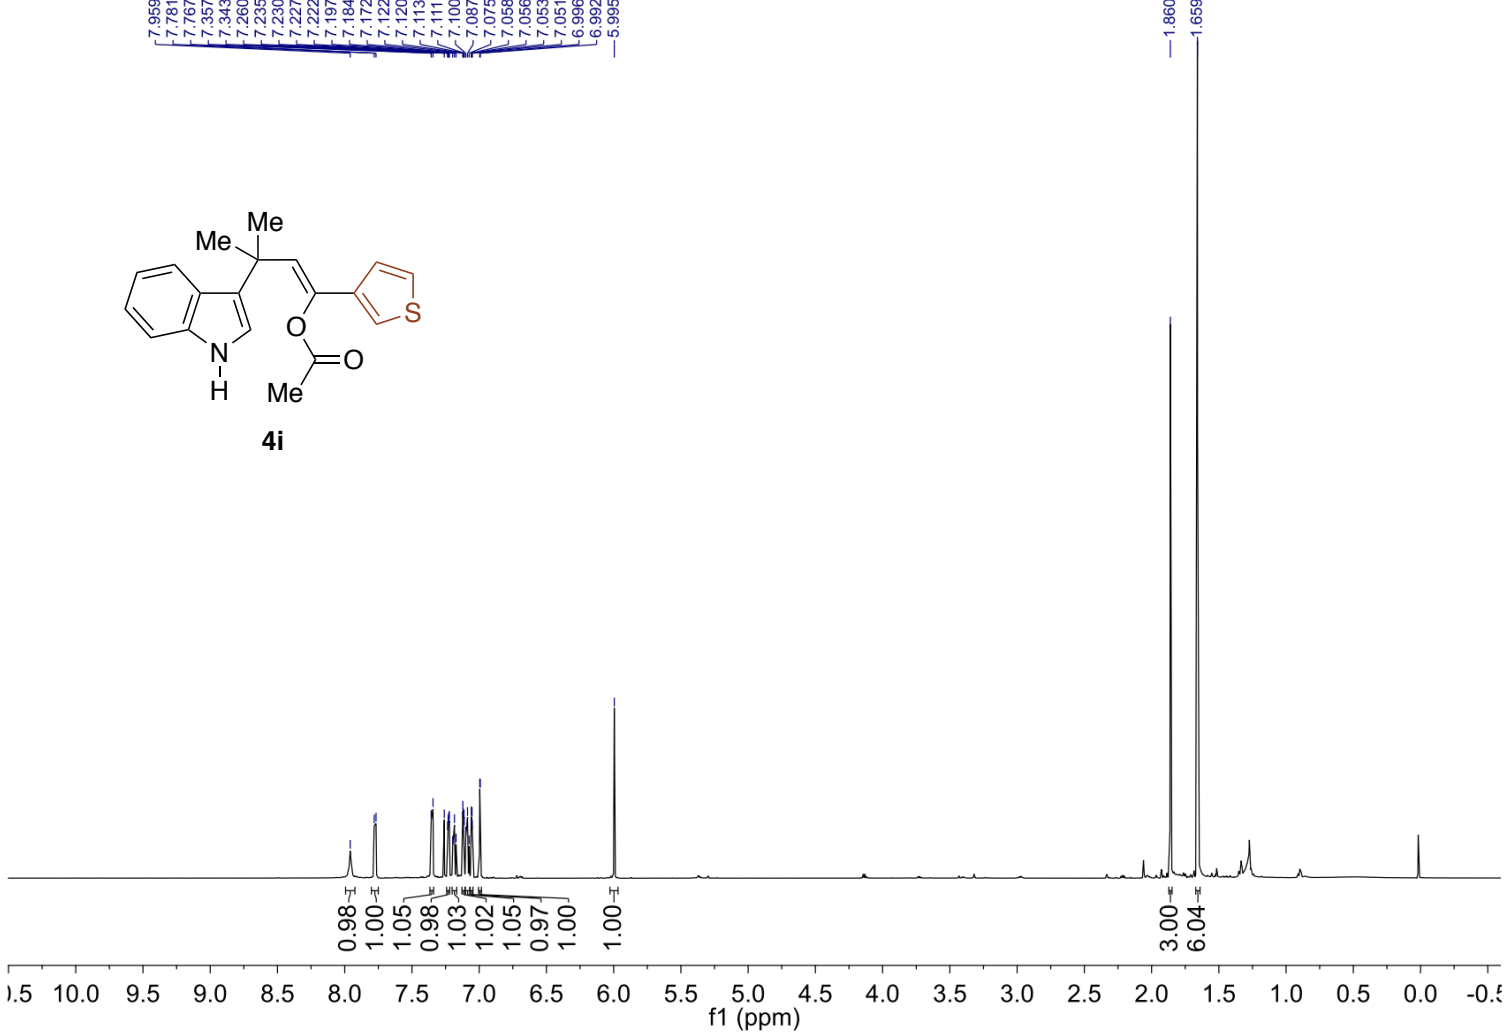

169.18  
141.50  
138.30  
137.10  
126.35  
126.18  
125.53  
124.94  
124.92  
121.91  
121.15  
120.31  
119.58  
119.30  
111.26  
77.37  
77.16  
76.95  
35.70  
29.24  
20.49

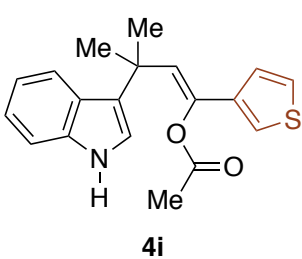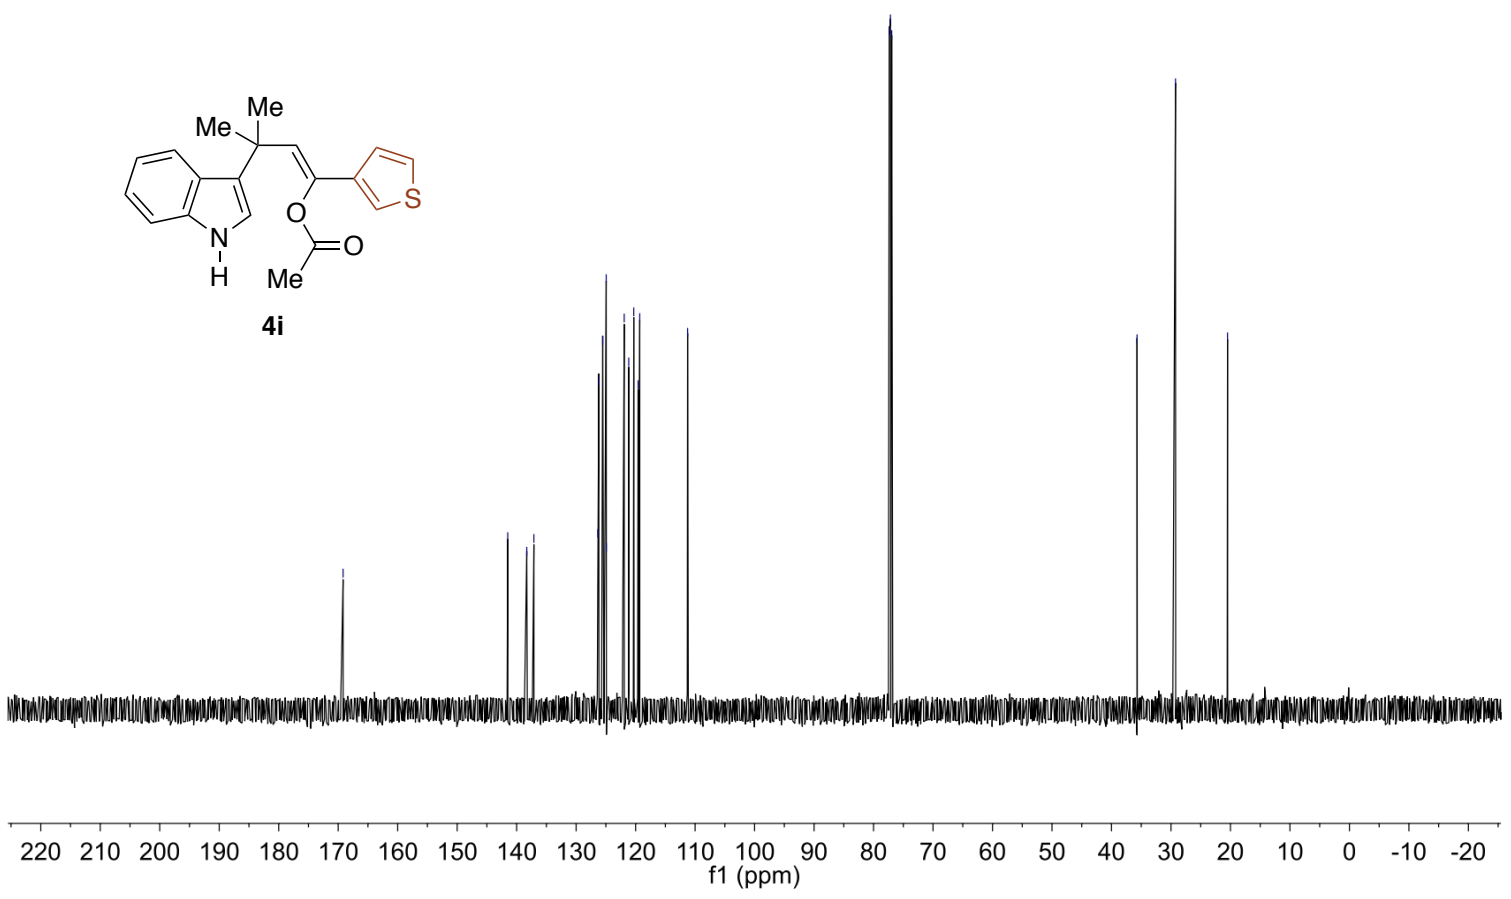

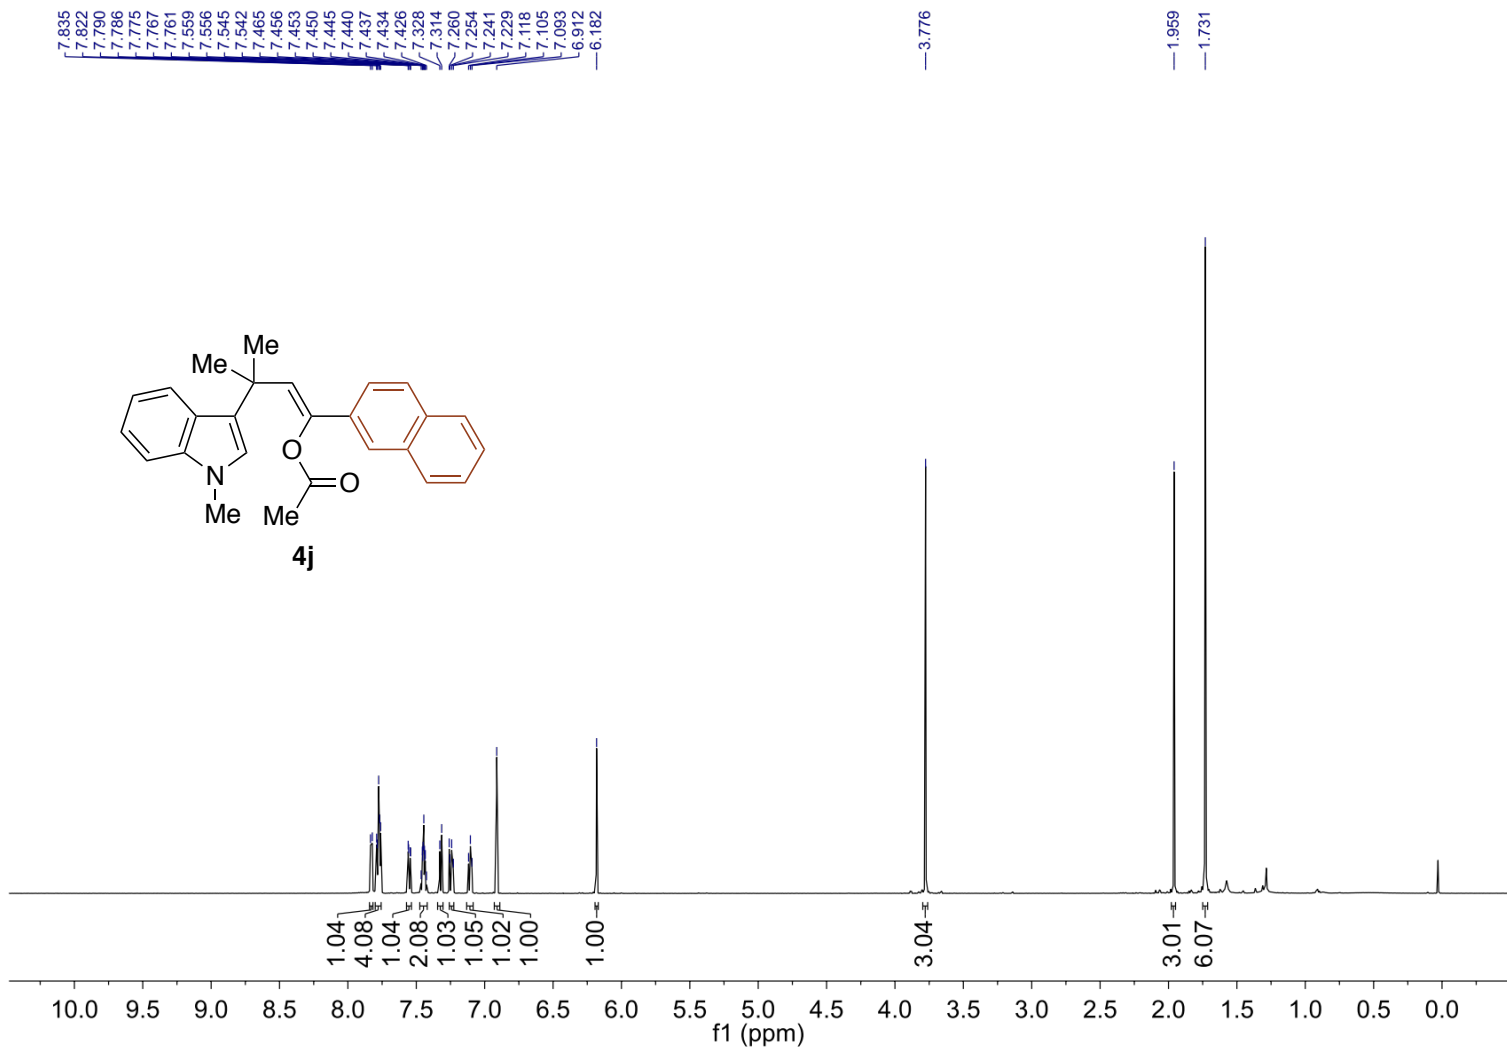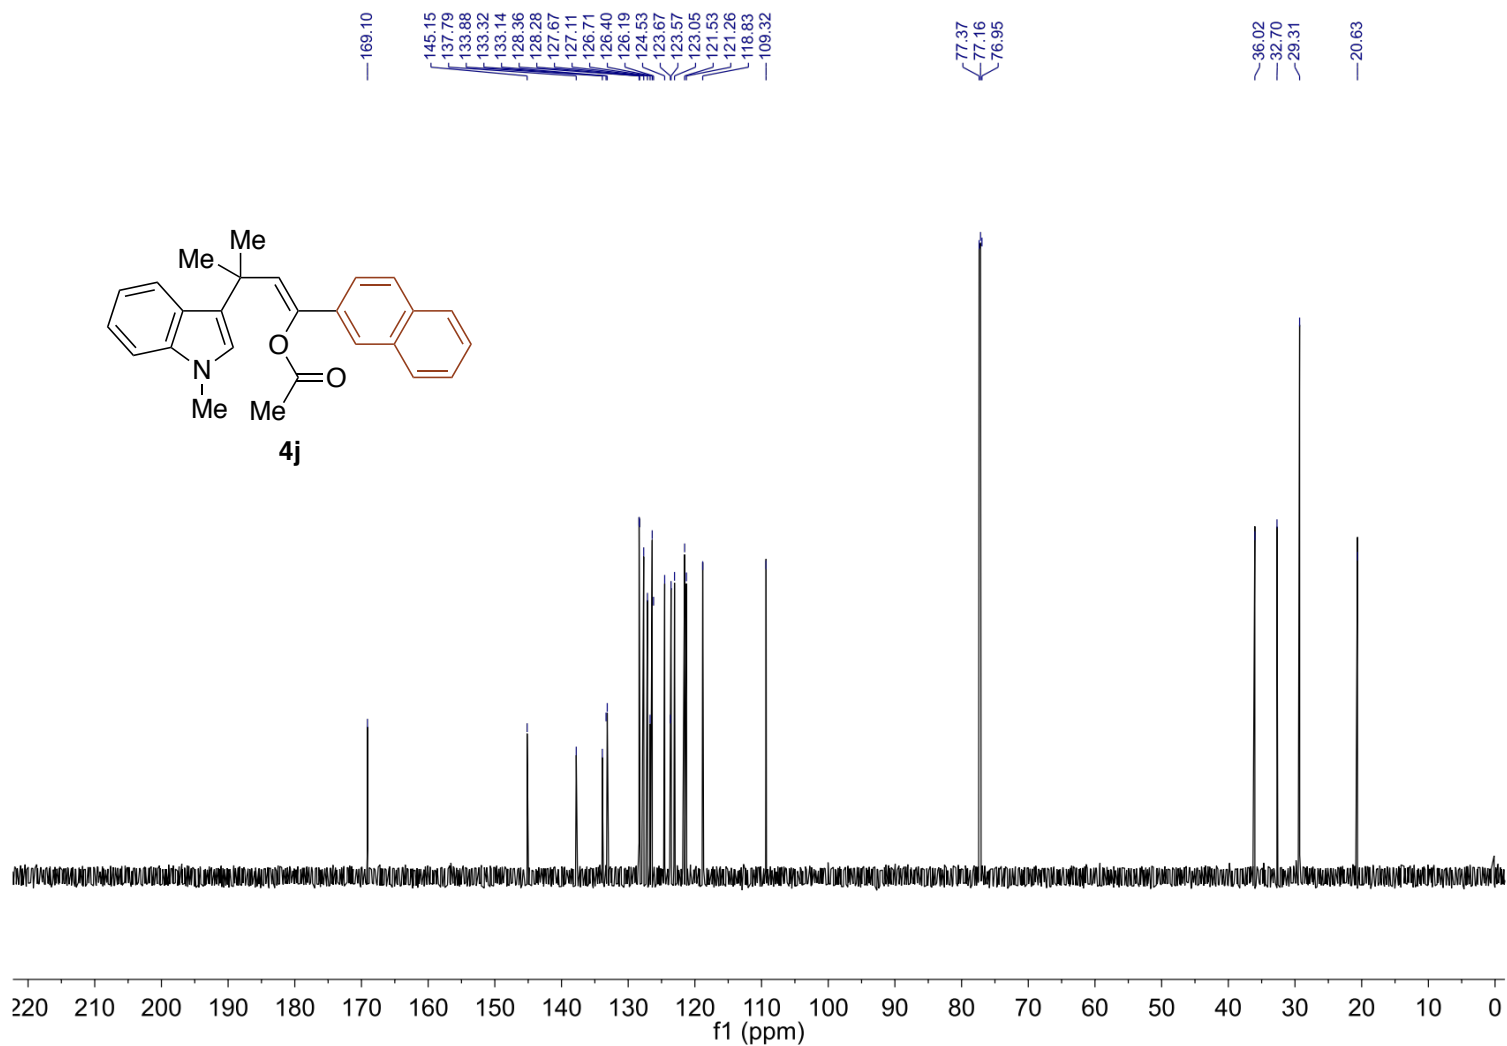

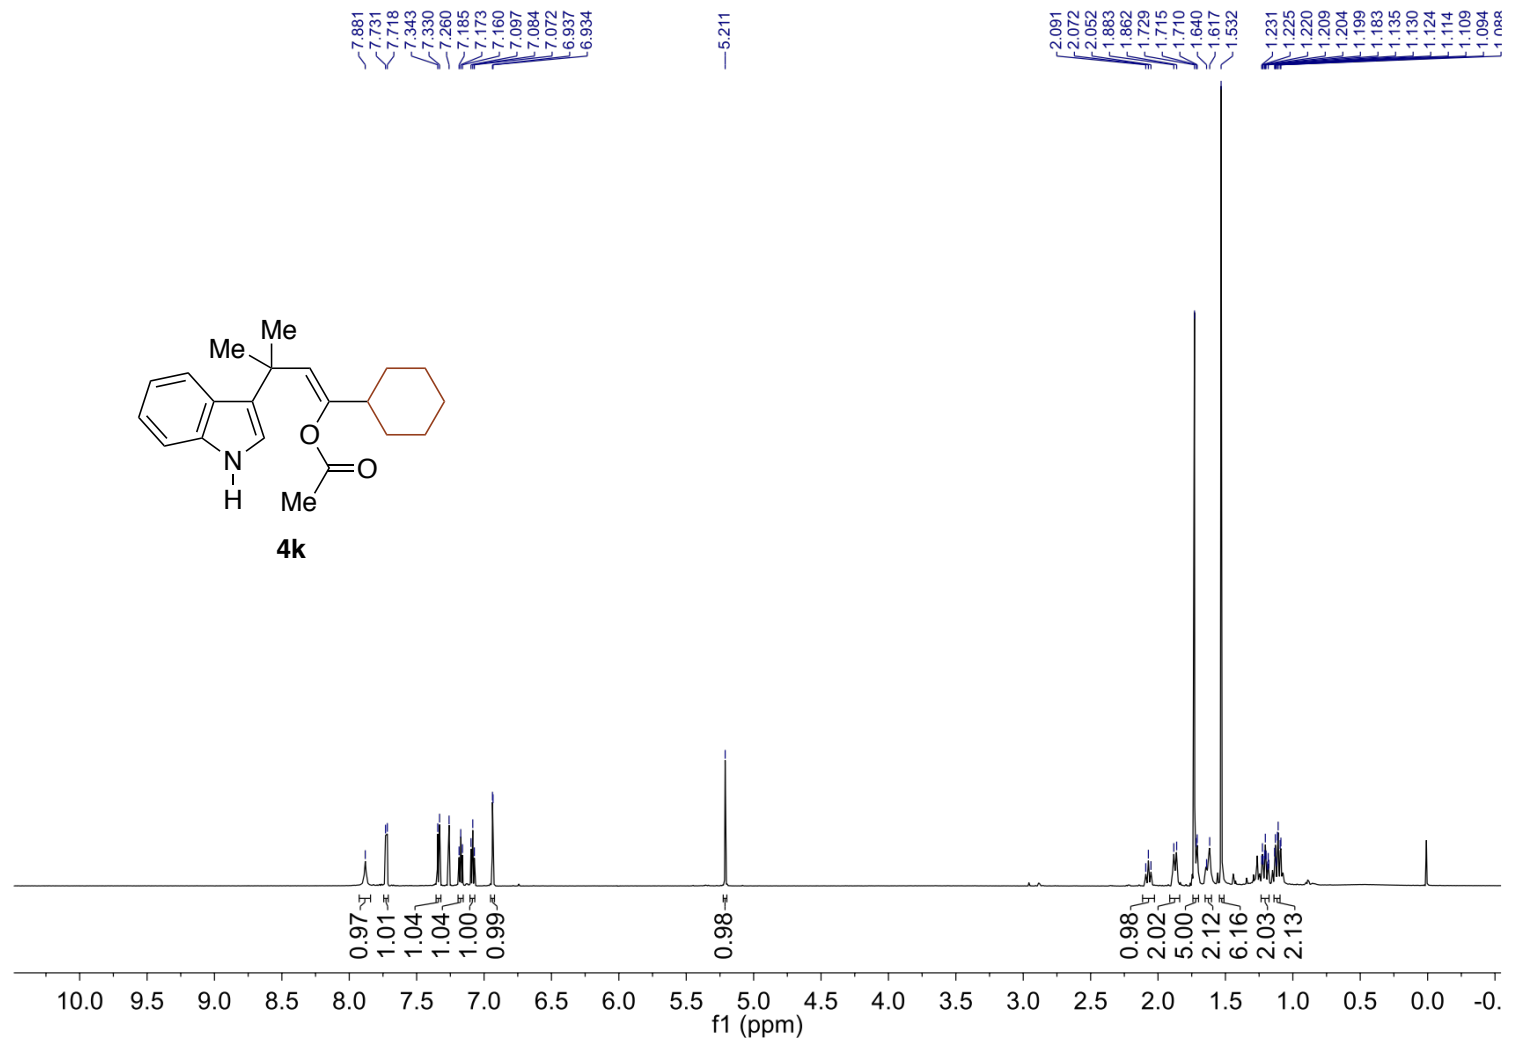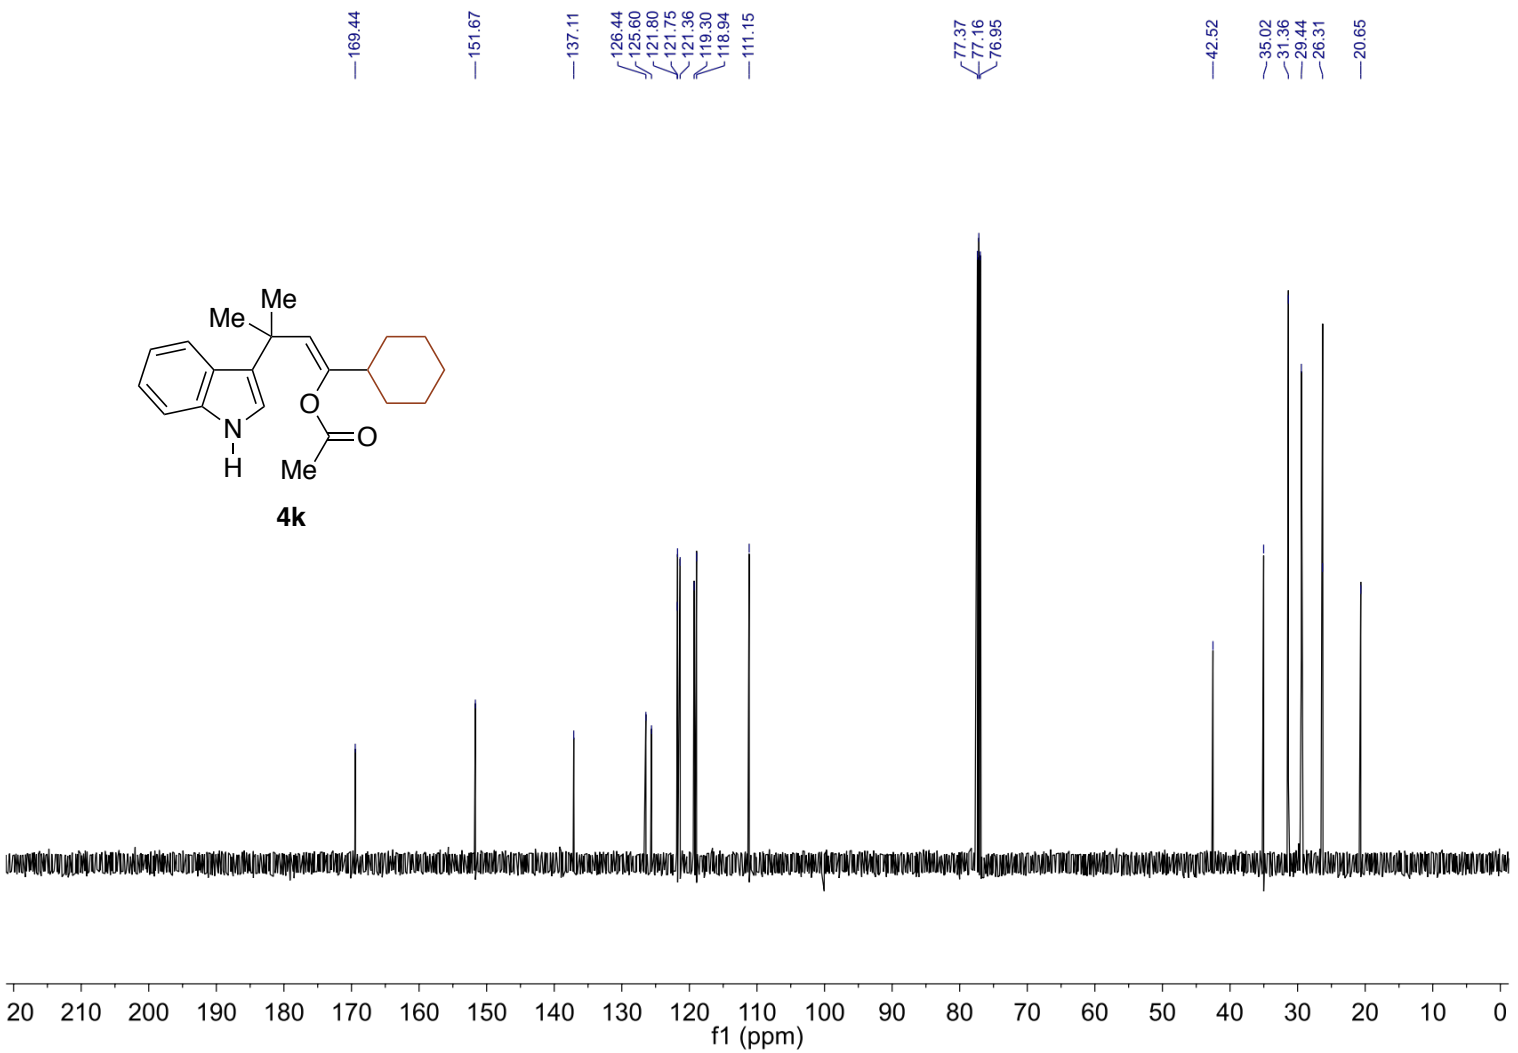

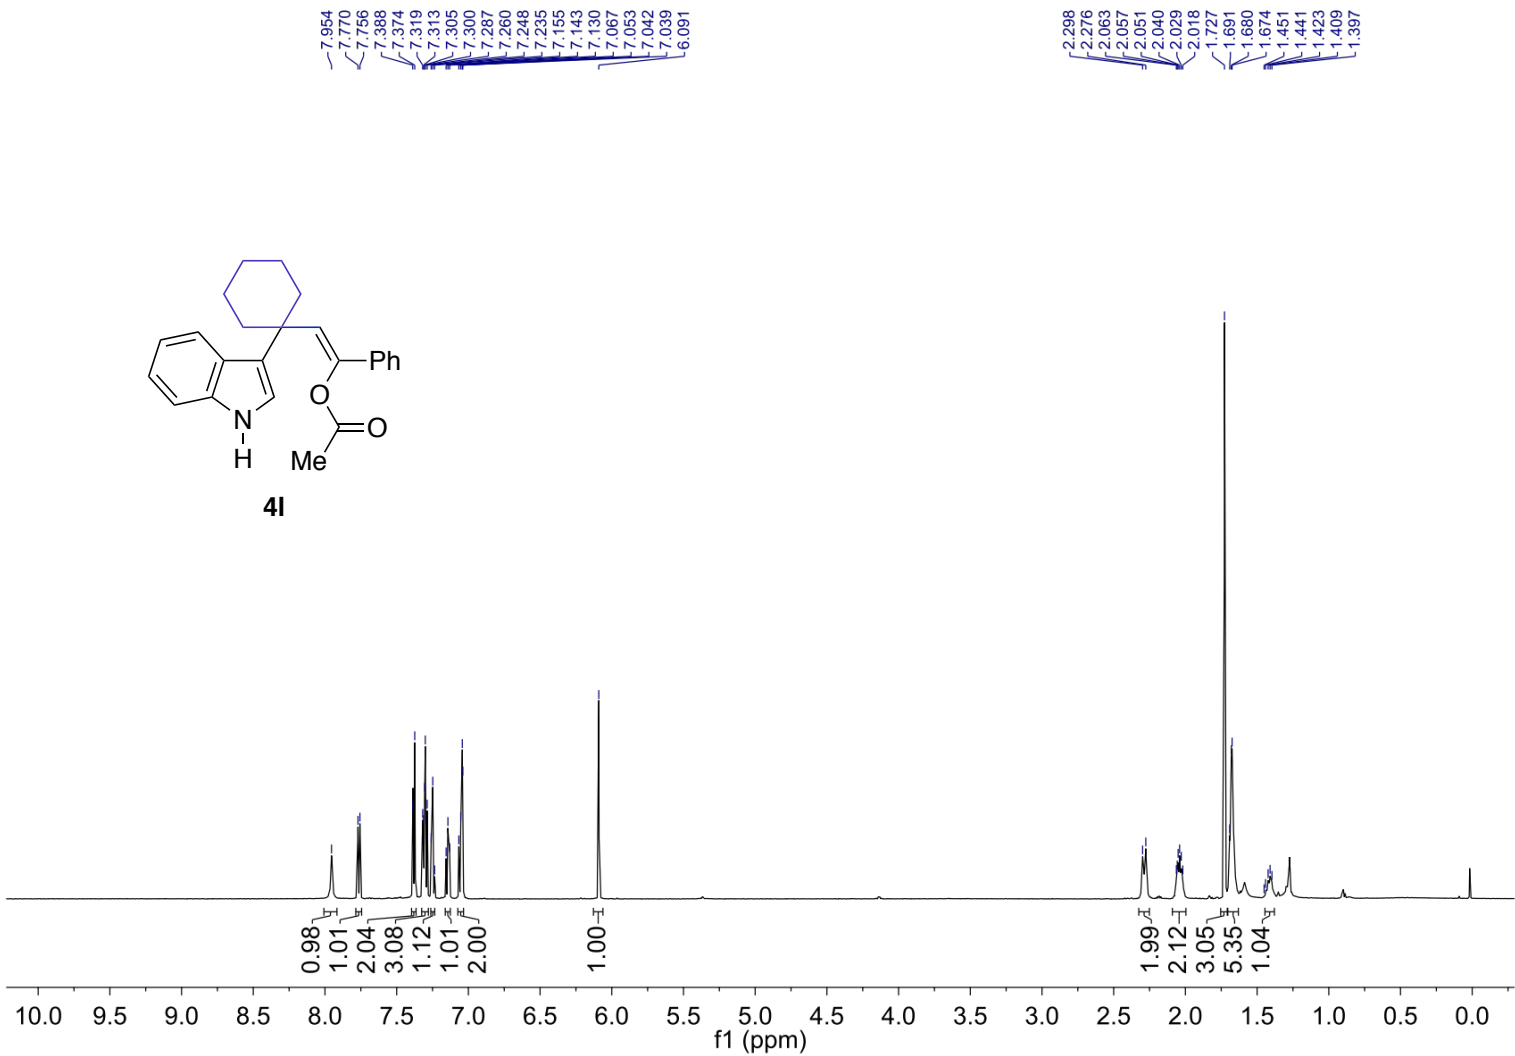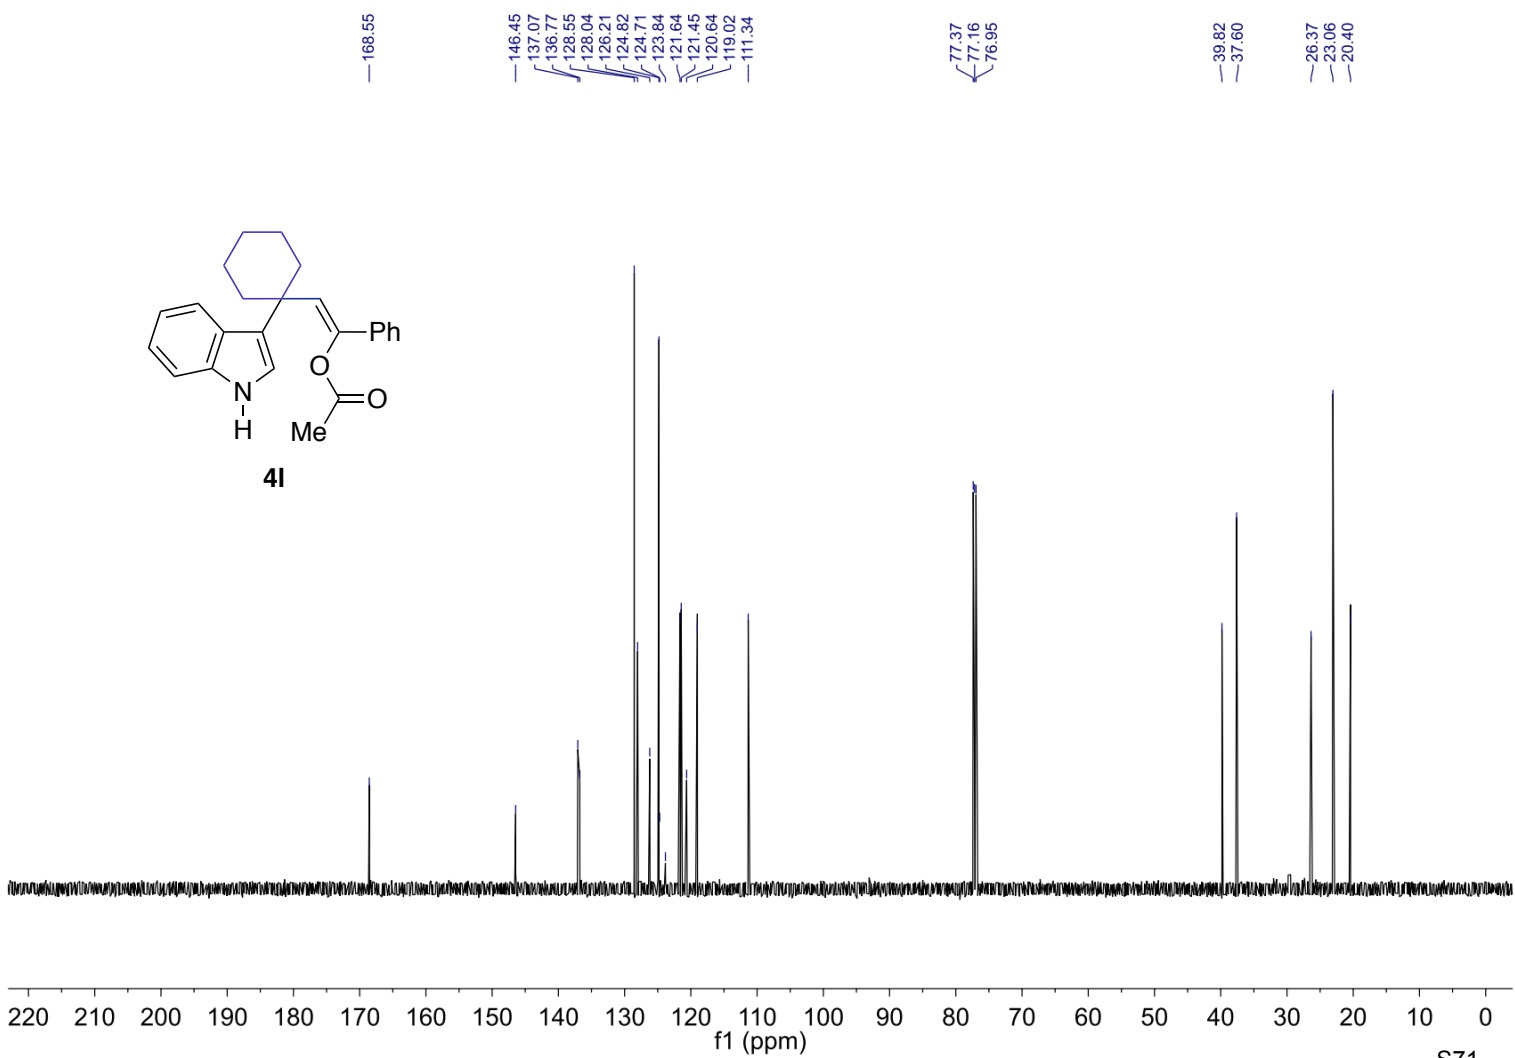

8.059  
7.728  
7.715  
7.377  
7.374  
7.362  
7.357  
7.345  
7.331  
7.314  
7.311  
7.302  
7.300  
7.289  
7.273  
7.264  
7.261  
7.256  
7.249  
7.173  
7.161  
7.148  
7.076  
7.063  
7.056  
7.052  
6.086  
3.902  
3.895  
3.887  
3.883  
3.875  
3.868  
3.855  
3.850  
3.840  
3.836  
3.831  
3.821  
3.816  
2.364  
2.357  
2.349  
2.341  
2.334  
2.326  
2.319  
2.297  
2.283  
2.287  
2.276  
2.269  
2.264  
1.750

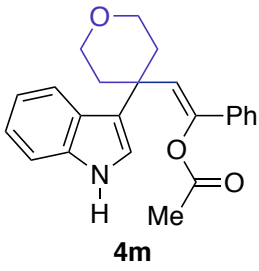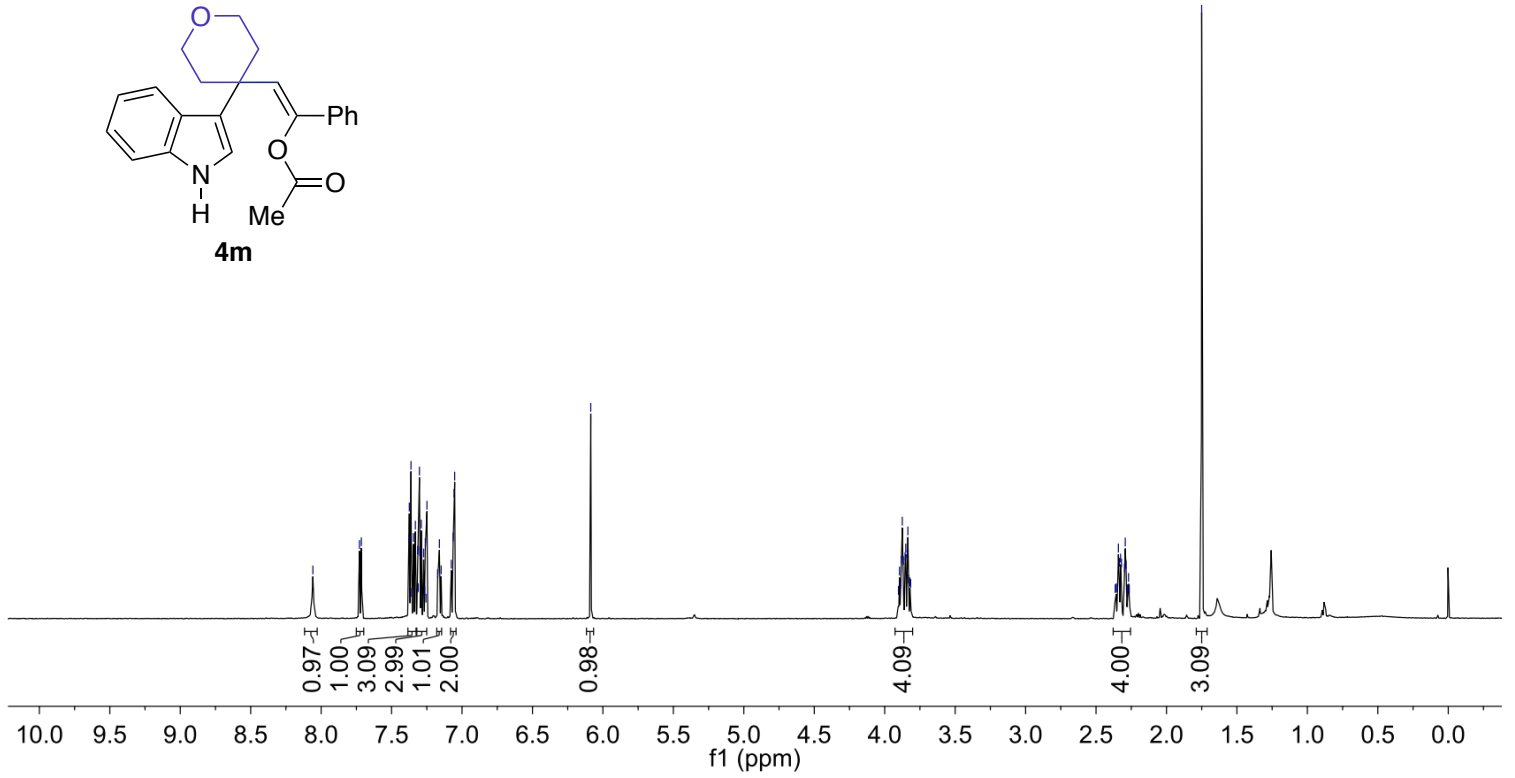

168.33  
147.46  
137.15  
136.39  
128.64  
128.41  
125.91  
124.91  
123.24  
122.14  
122.01  
121.08  
120.82  
119.35  
111.50  
77.37  
77.16  
76.95  
64.87  
37.54  
37.40  
20.45

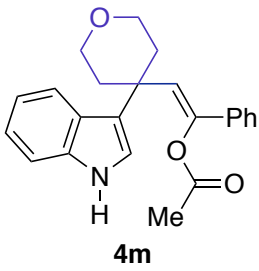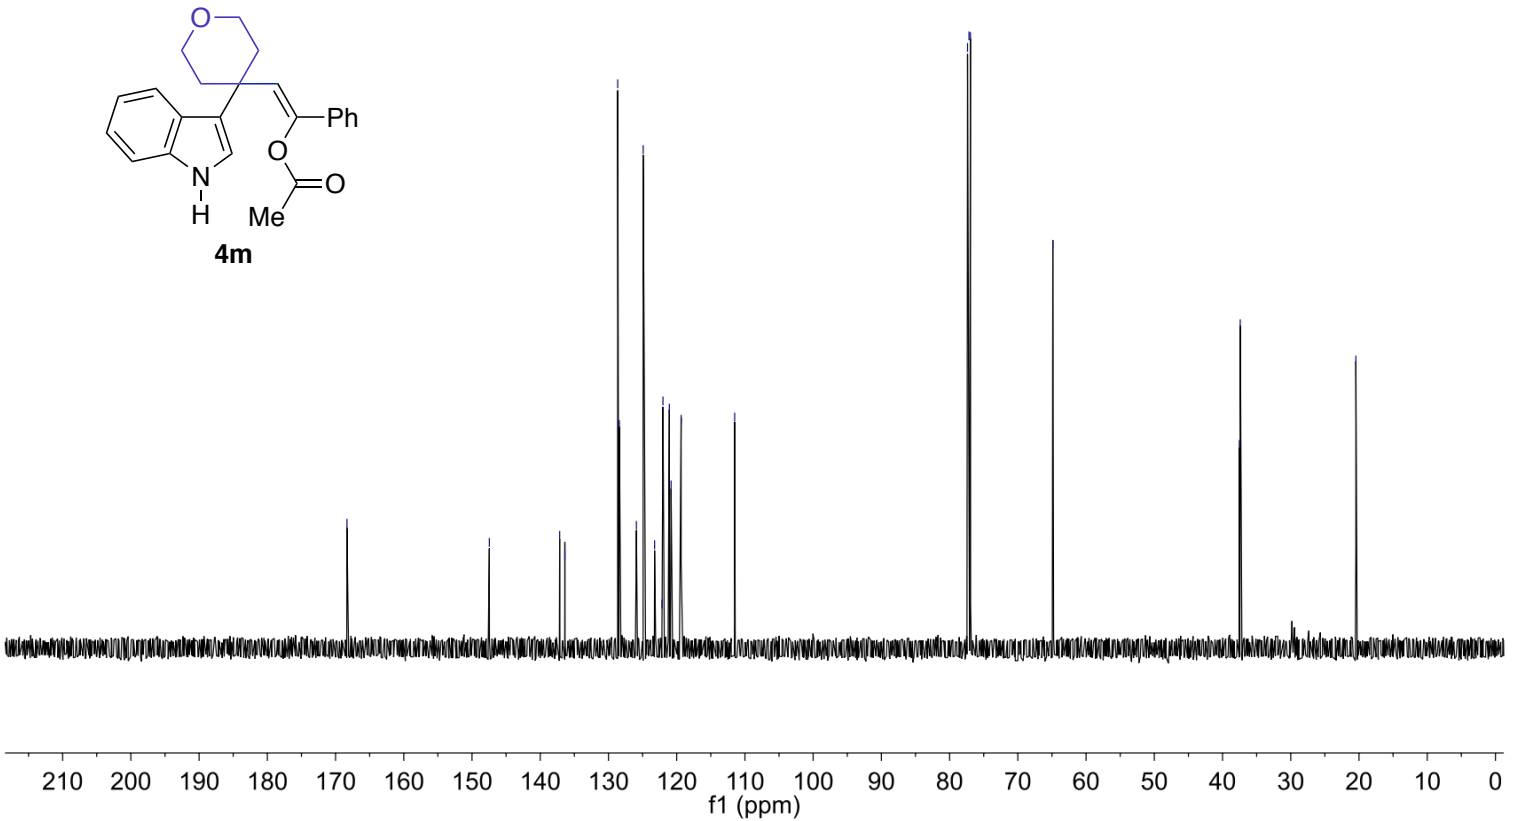



7.714  
7.701  
7.419  
7.404  
7.313  
7.302  
7.294  
7.289  
7.281  
7.262  
7.256  
7.250  
7.237  
7.232  
7.218  
7.207  
7.110  
7.097  
7.085  
6.892  
5.952  
5.936

4.054  
4.042  
4.025  
4.014  
4.002  
3.754

2.337

1.543  
1.532

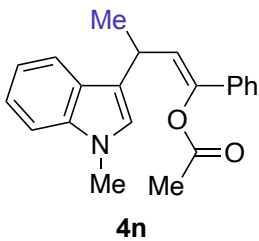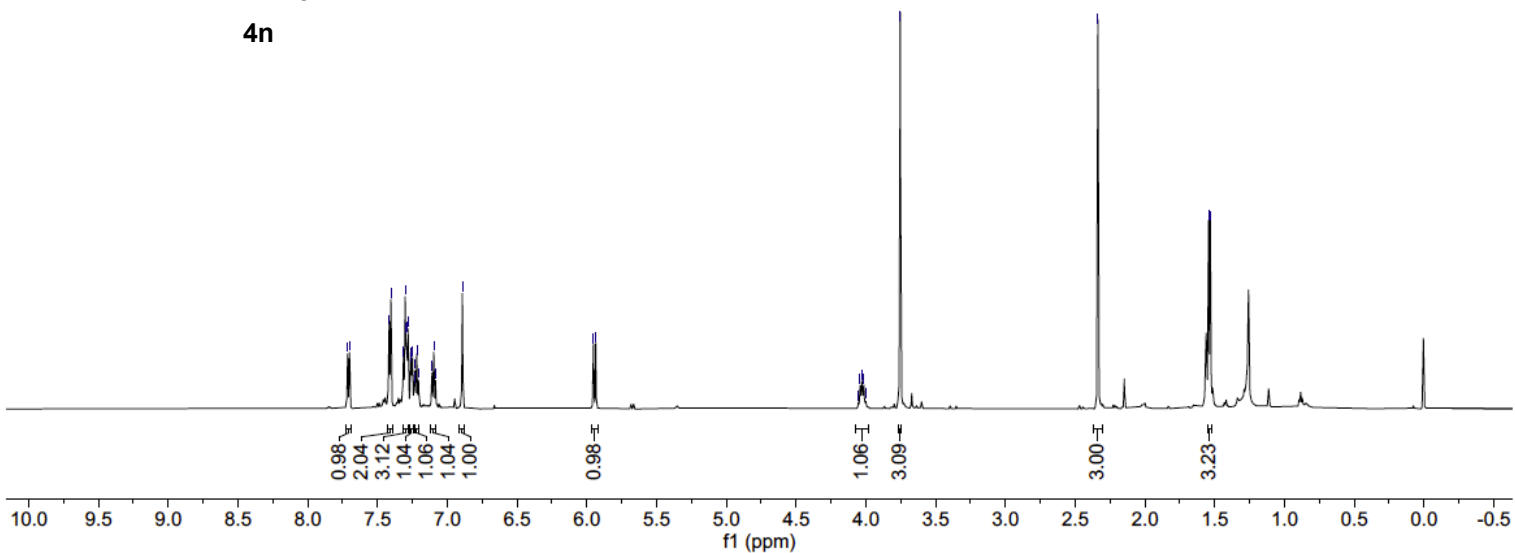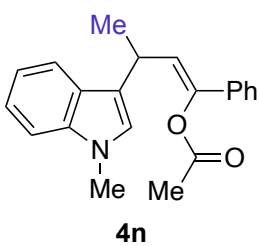

169.21

144.87

137.41  
135.18  
128.60  
128.24  
127.31  
125.14  
124.68  
123.46  
121.77  
119.76  
118.98  
118.66  
109.32

77.37  
77.46  
76.95

32.81

28.75

20.91  
20.49

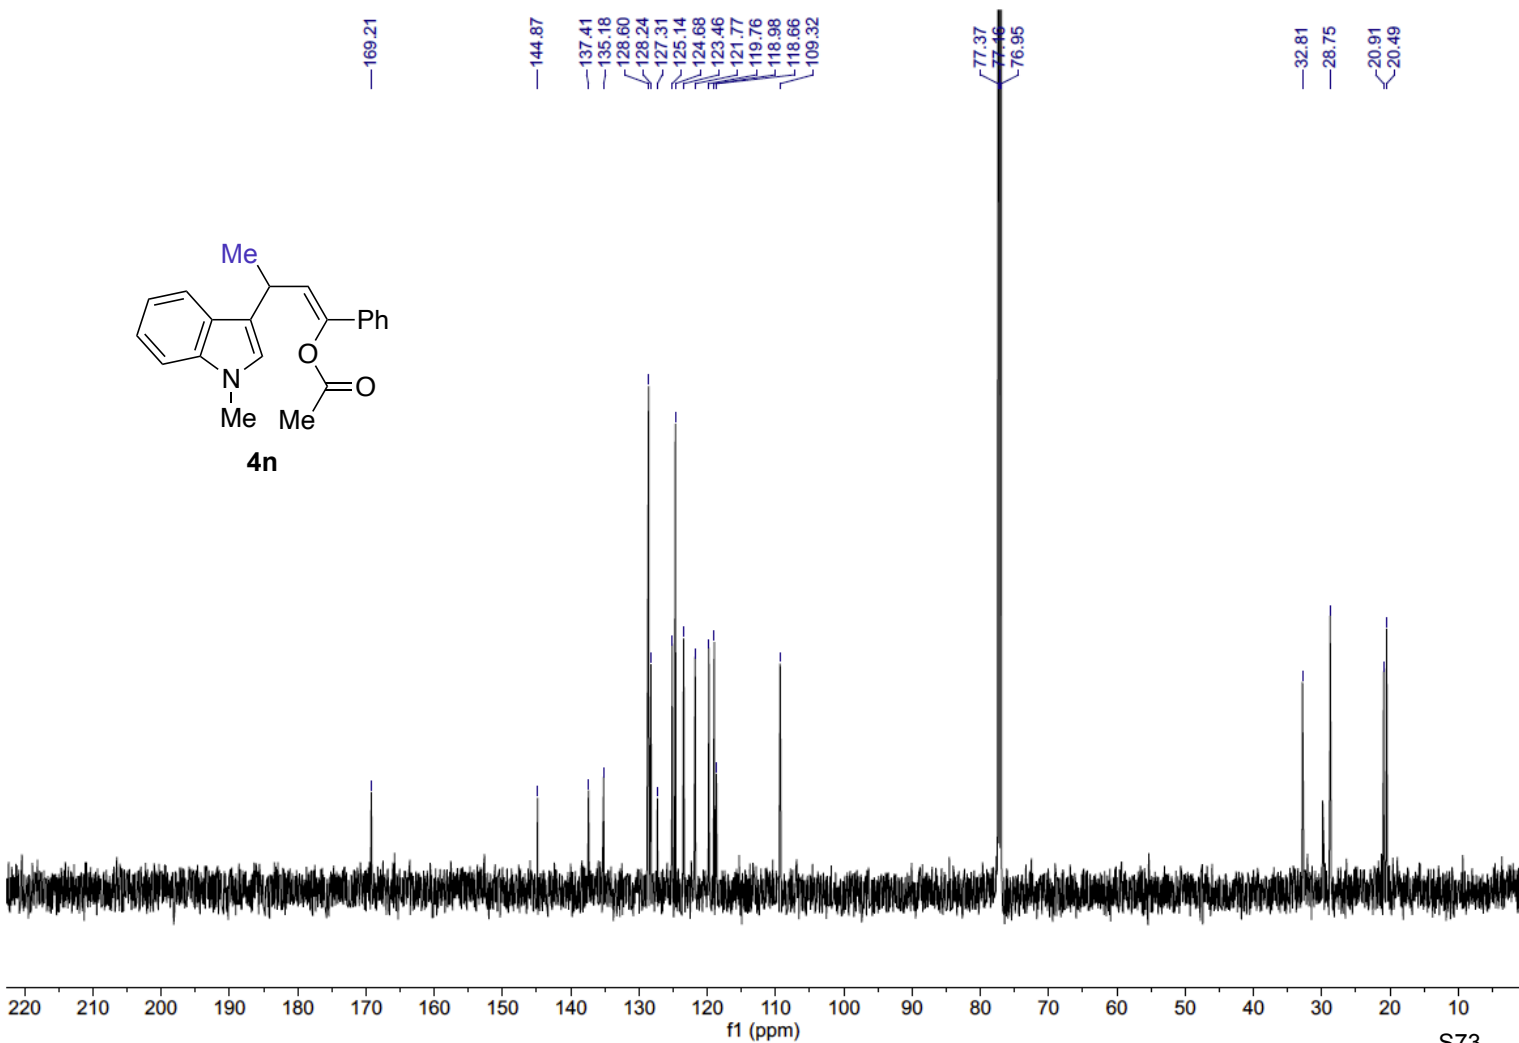

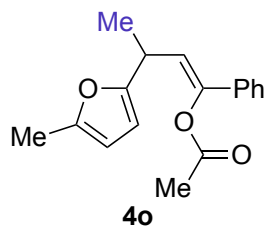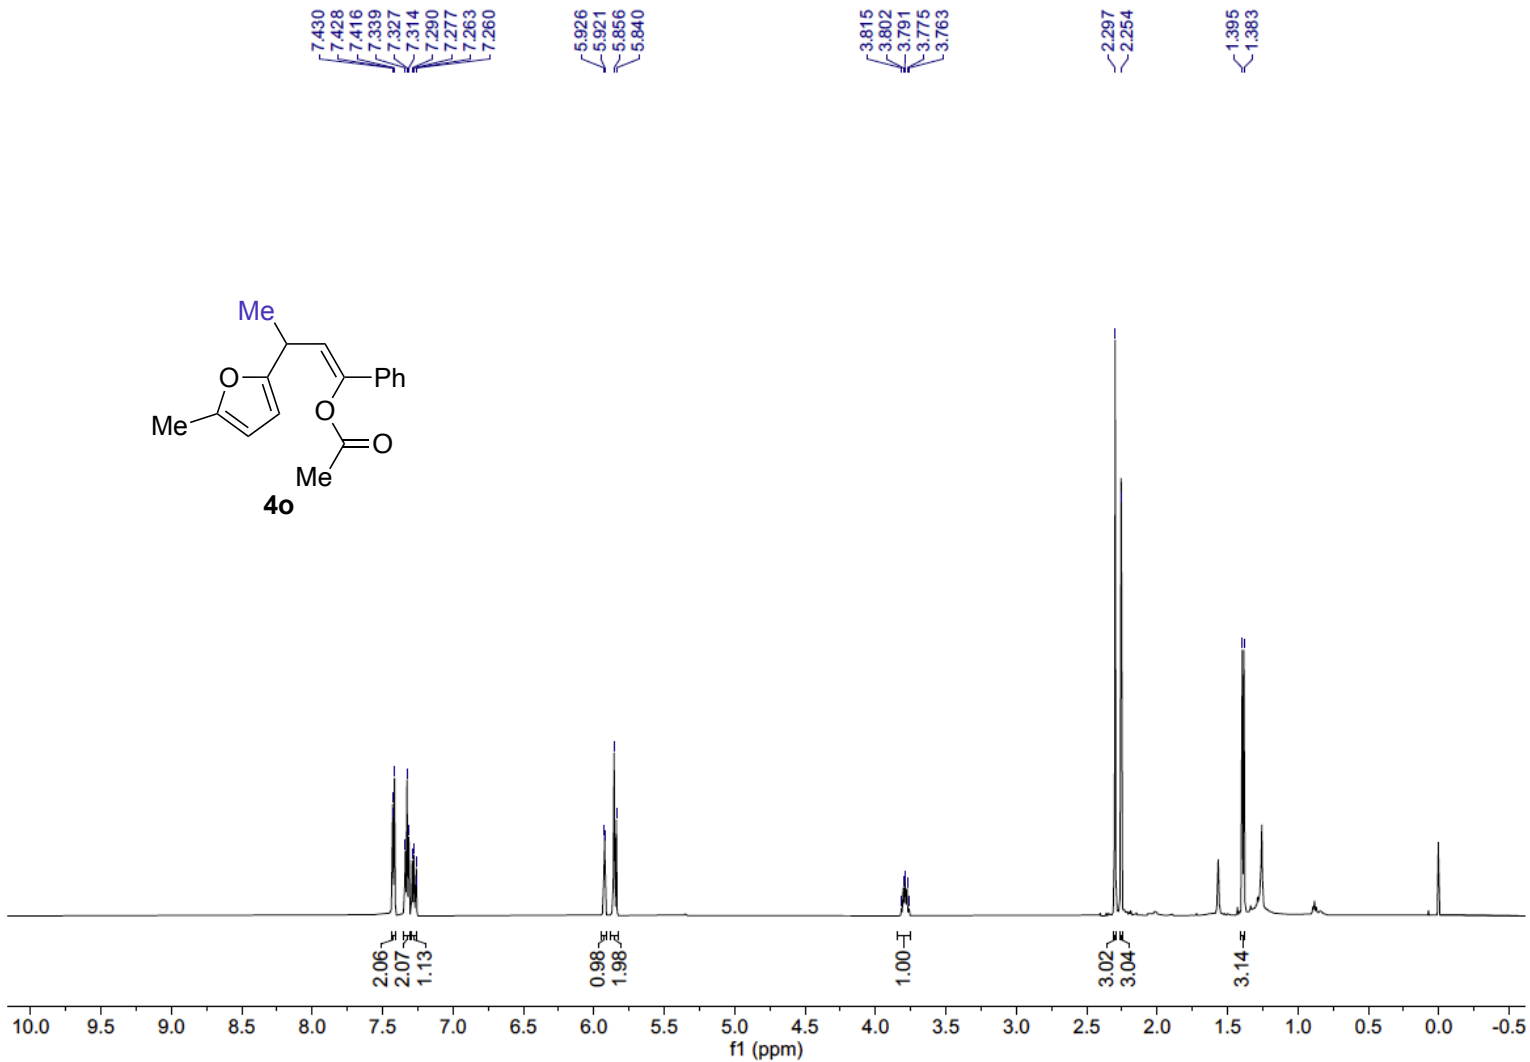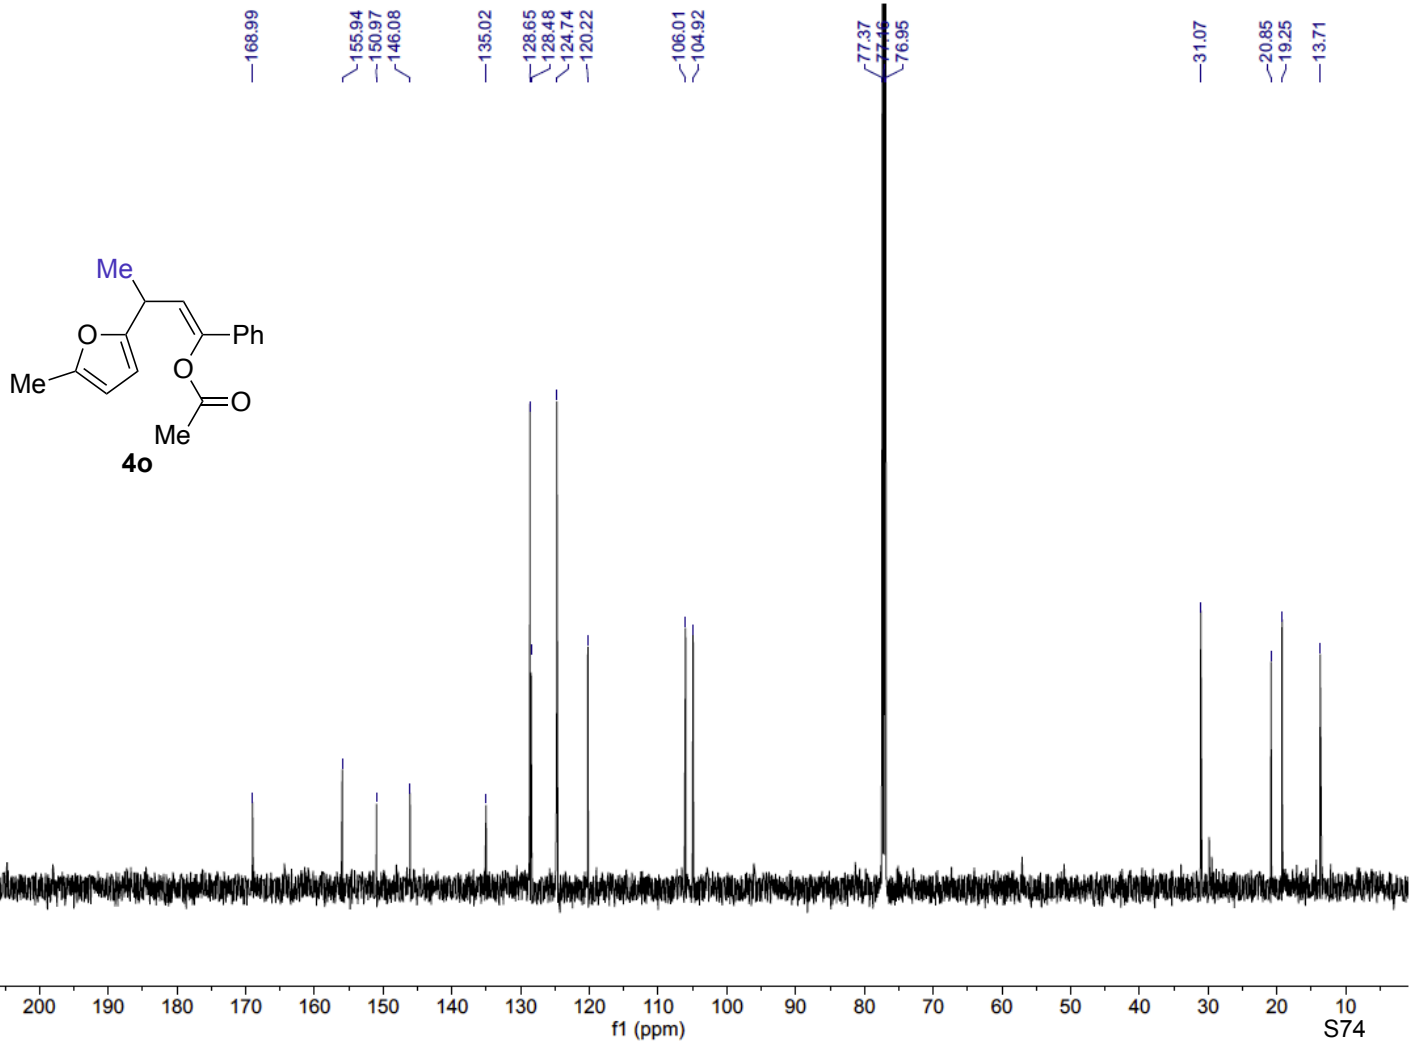

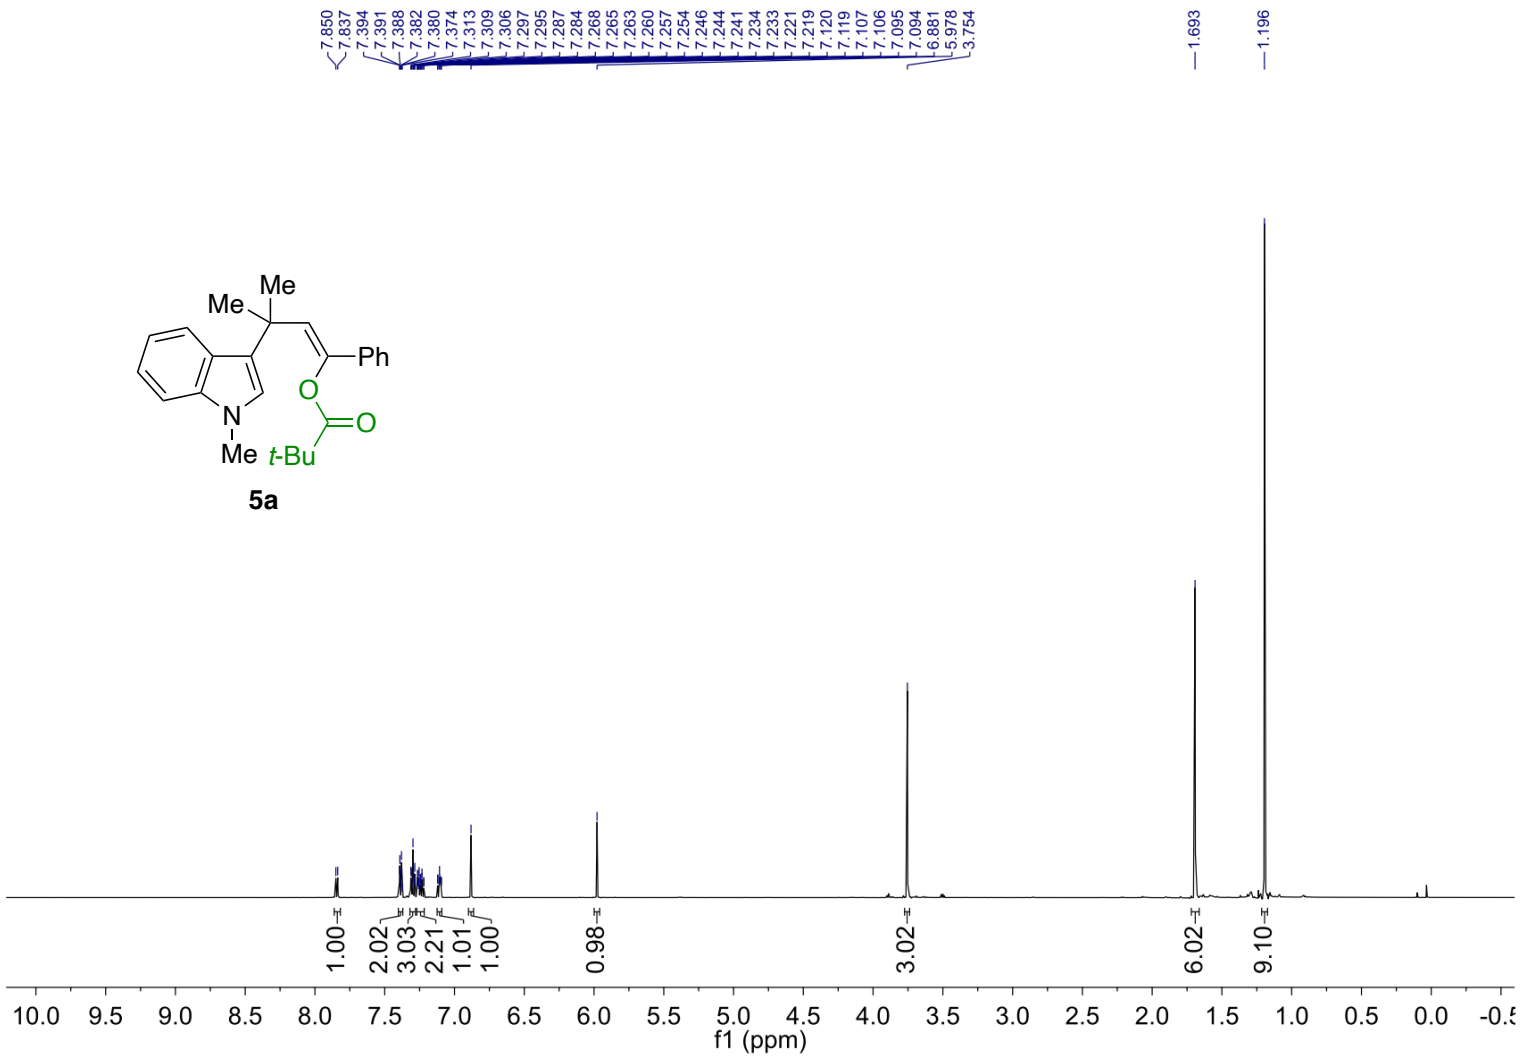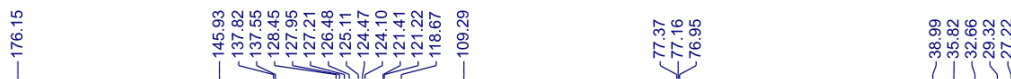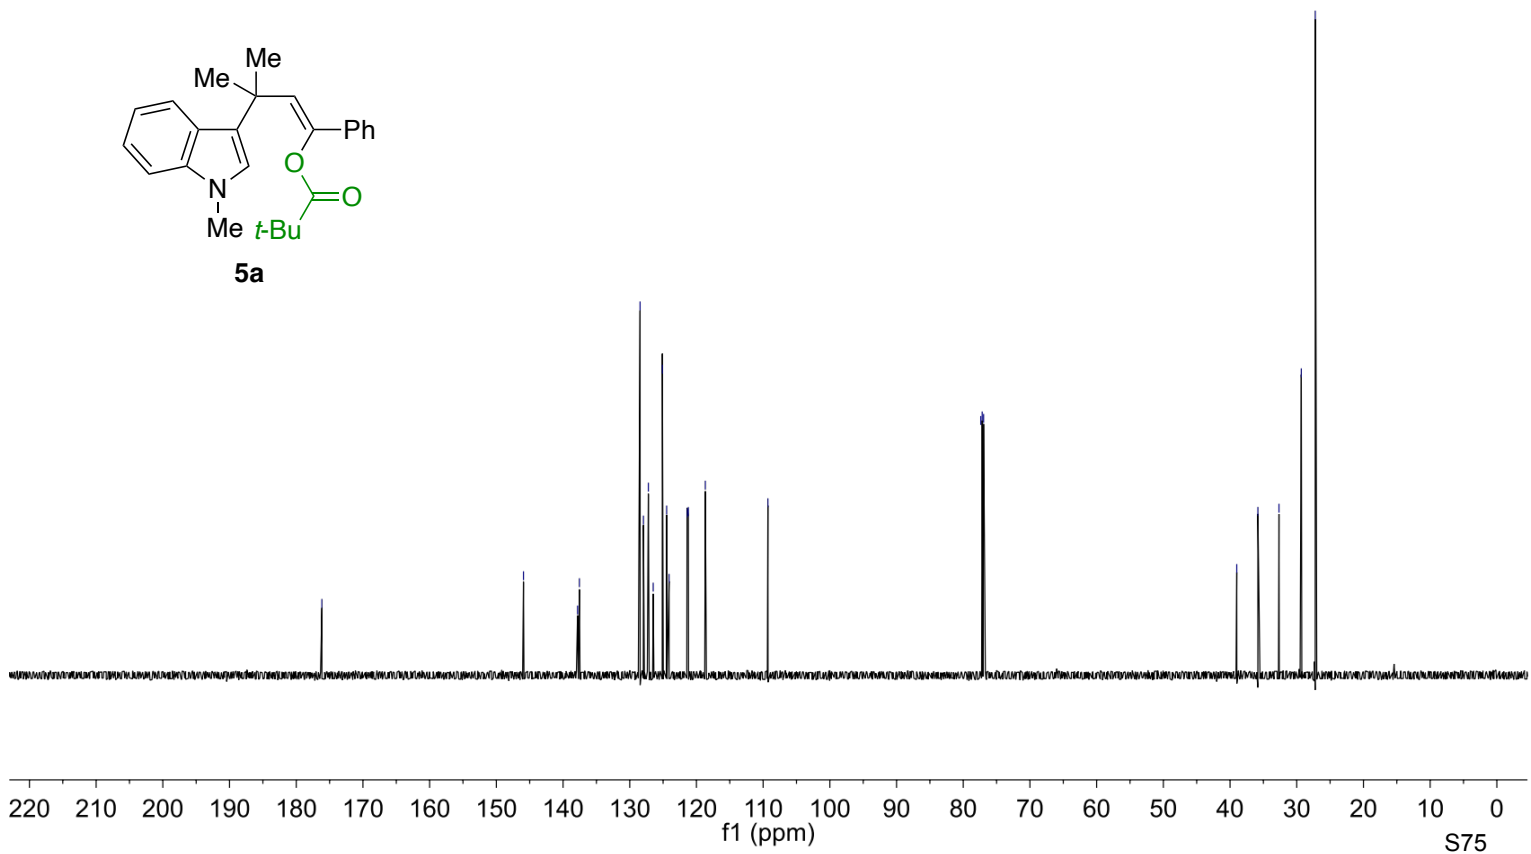

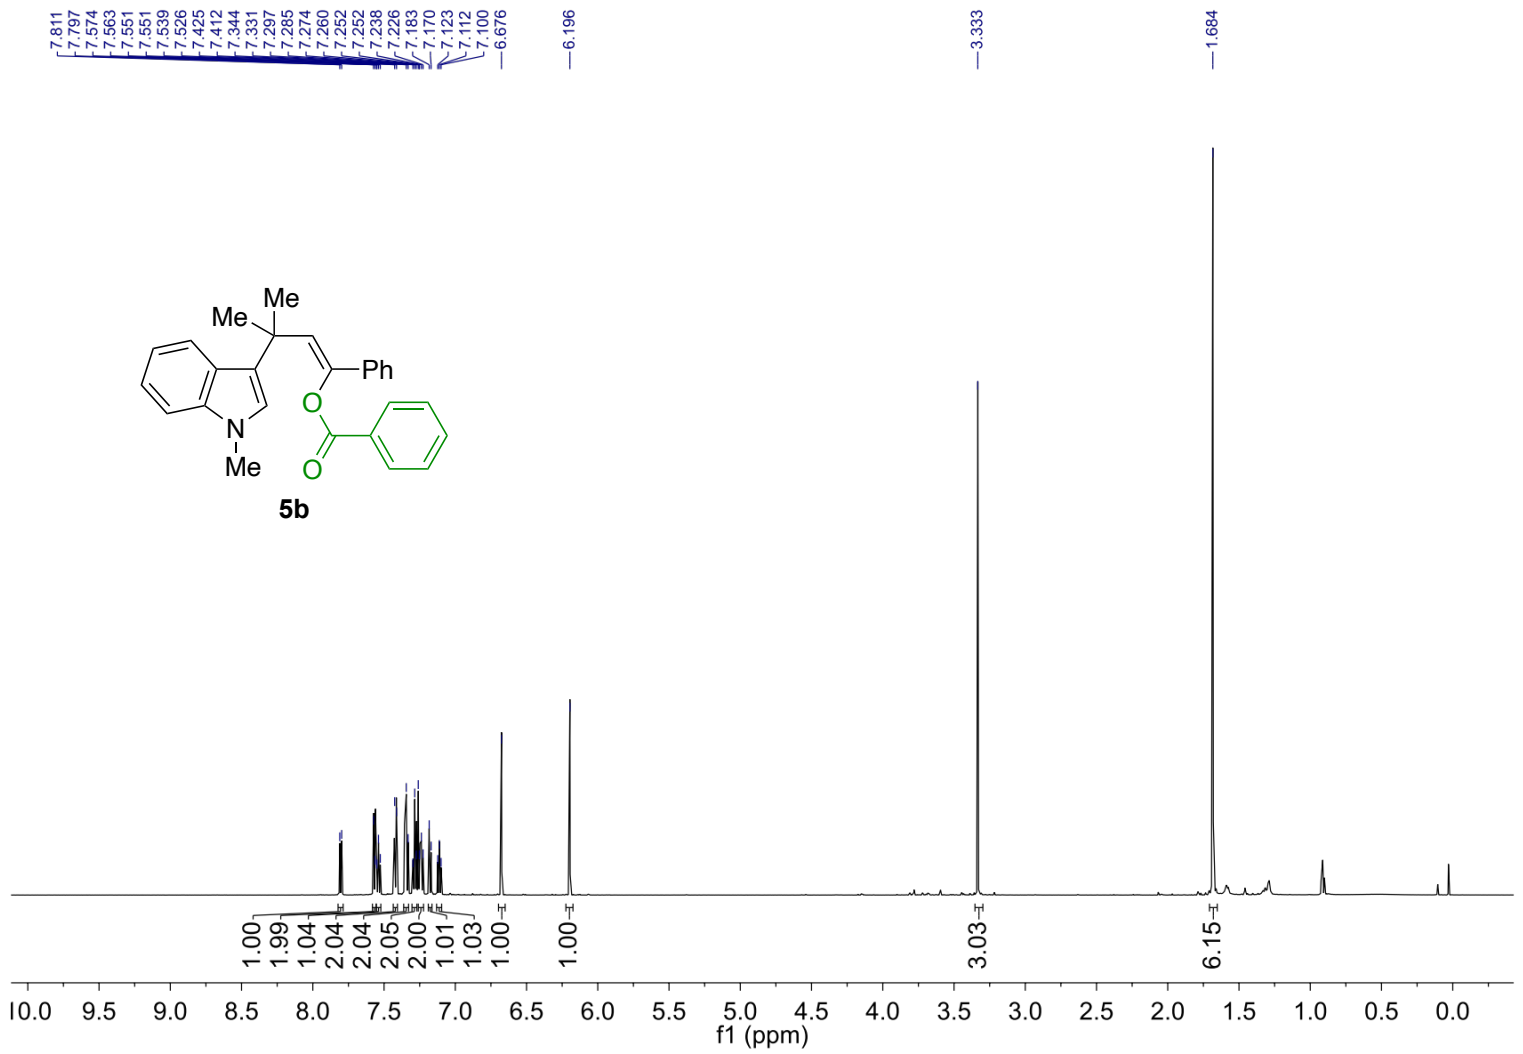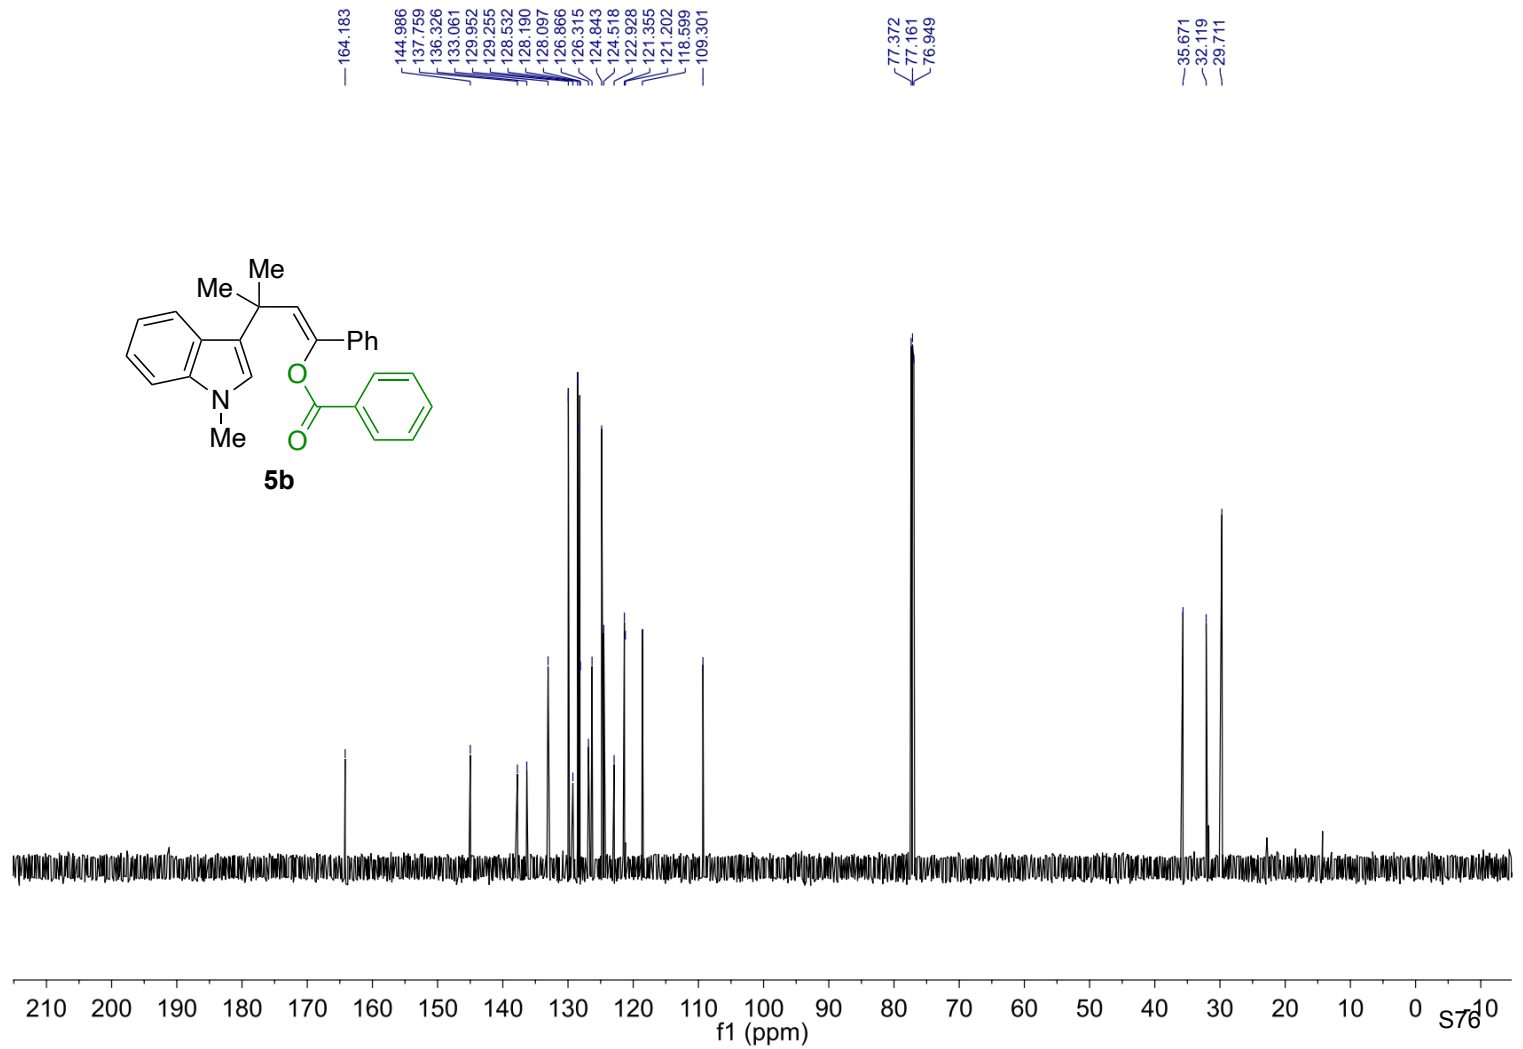

7.807  
7.793  
7.759  
7.544  
7.407  
7.394  
7.278  
7.266  
7.253  
7.240  
7.228  
7.216  
7.204  
7.191  
7.109  
7.086  
7.084  
6.831  
6.816  
6.697  
6.169

3.863

3.410

1.666

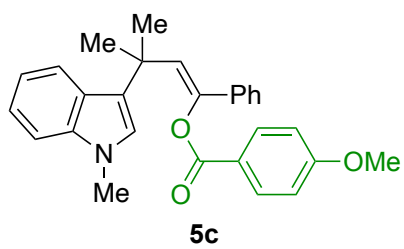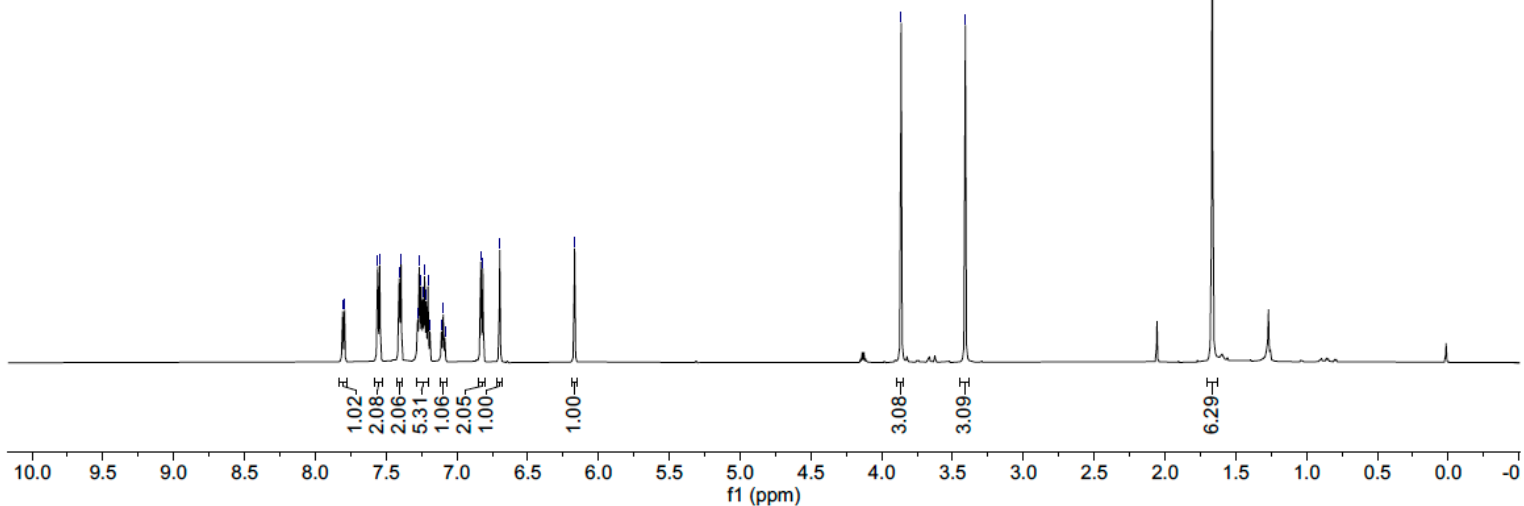

164.08  
163.54

145.00  
137.73  
136.46  
132.09  
128.51  
128.03  
126.83  
126.26  
124.79  
124.51  
123.16  
121.73  
121.33  
121.21  
118.58  
113.46  
109.28

77.38  
77.46  
76.95

55.61

35.66  
32.27  
29.61

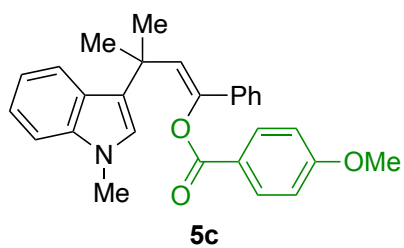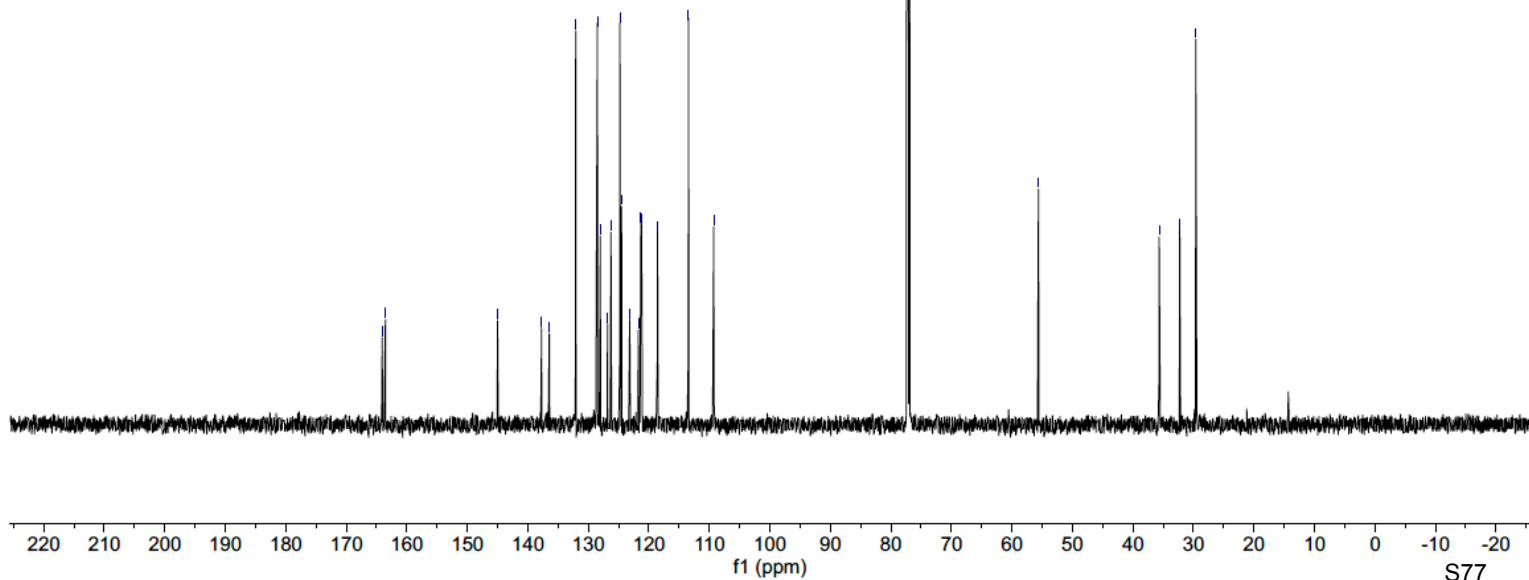

7.797  
7.784  
7.784  
7.504  
7.495  
7.489  
7.480  
7.411  
7.400  
7.307  
7.296  
7.283  
7.272  
7.260  
7.245  
7.234  
7.187  
7.173  
7.127  
7.113  
7.102  
7.009  
6.994  
6.980  
6.674

6.190

3.358

1.671

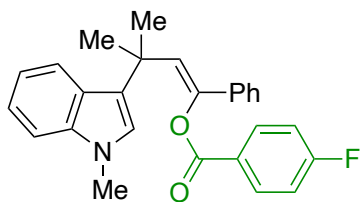

5d

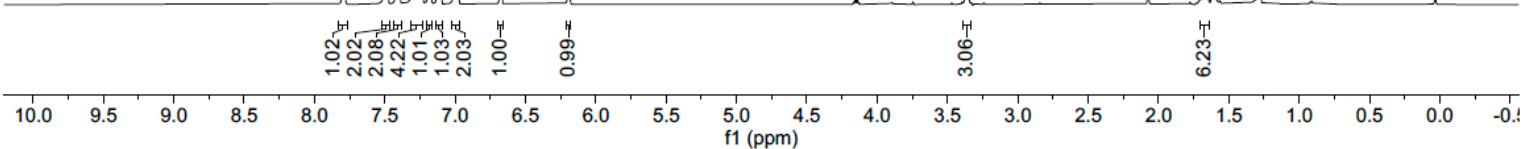

166.66  
164.97  
163.21

144.72  
137.68  
136.15  
132.51  
132.45  
128.56  
128.18  
128.89  
126.28  
125.42  
125.40  
124.78  
124.50  
122.71  
121.41  
121.19  
118.65  
115.30  
115.15  
109.28

77.37  
77.16  
76.95

35.64  
32.14  
29.79

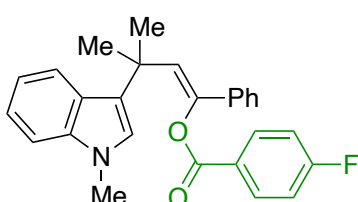

5d

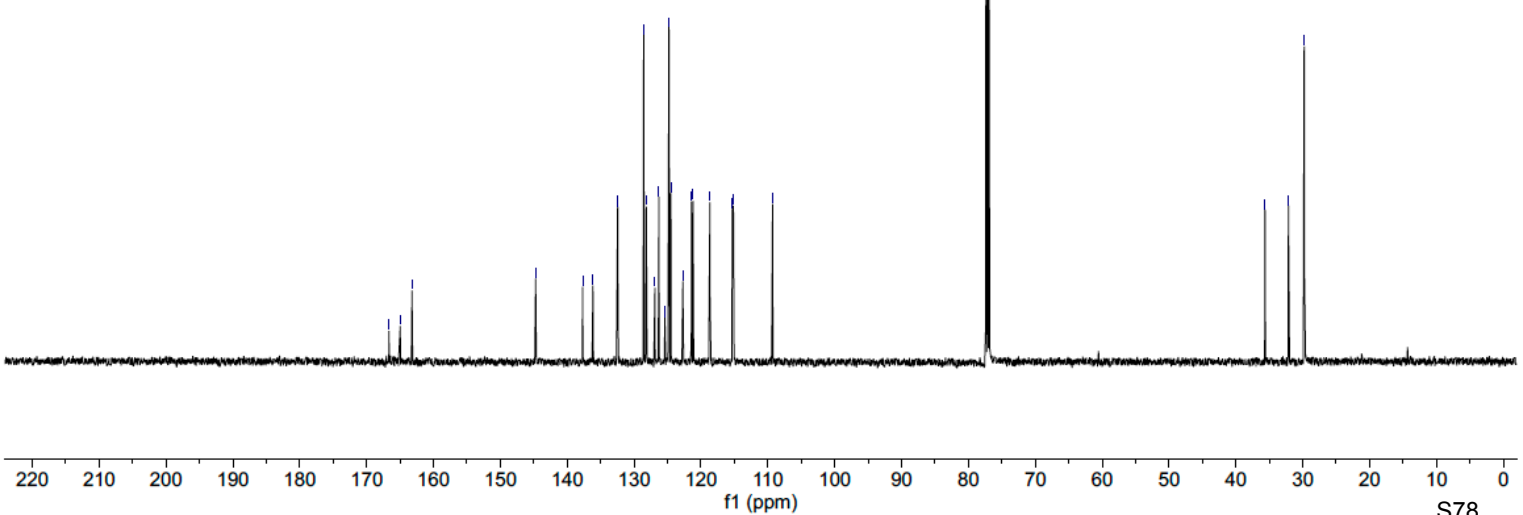

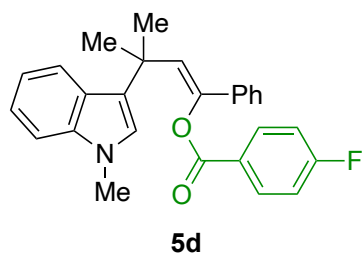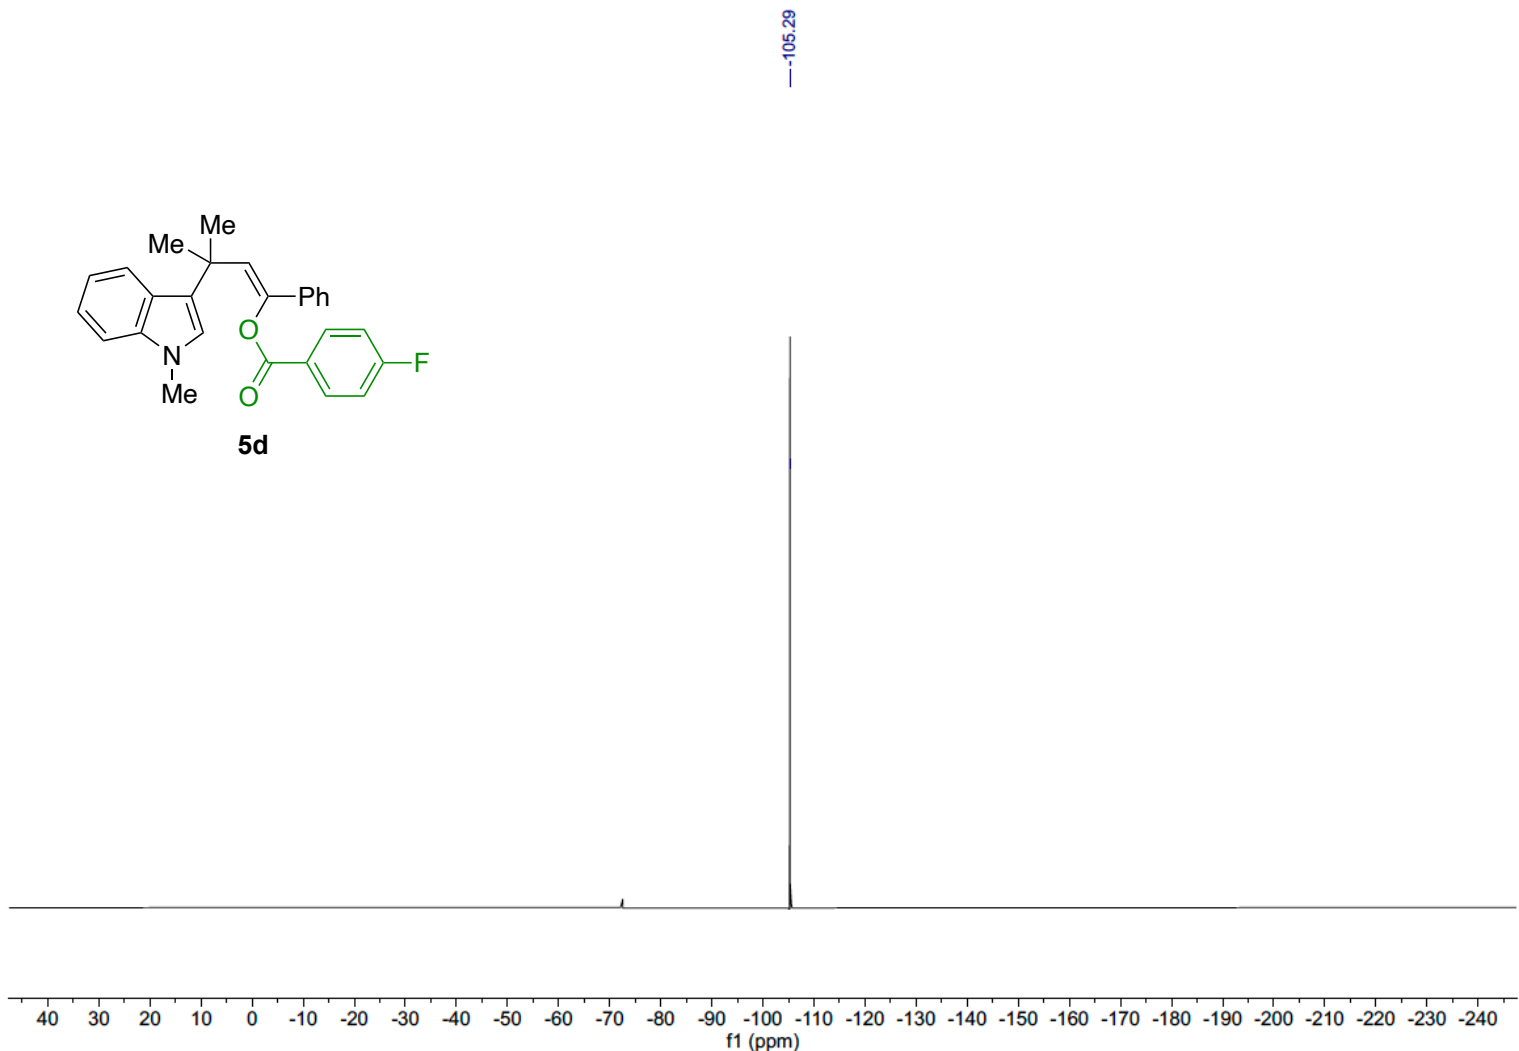

7.798  
7.784  
7.525  
7.511  
7.438  
7.426  
7.406  
7.396  
7.384  
7.295  
7.284  
7.271  
7.260  
7.252  
7.240  
7.216  
7.205  
7.191  
7.170  
7.156  
7.148  
7.136  
7.098  
7.085  
6.878

6.179

3.385

2.403

1.679

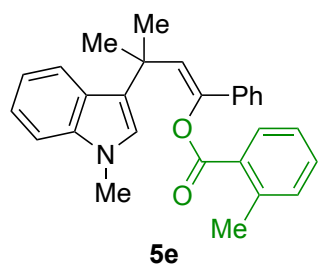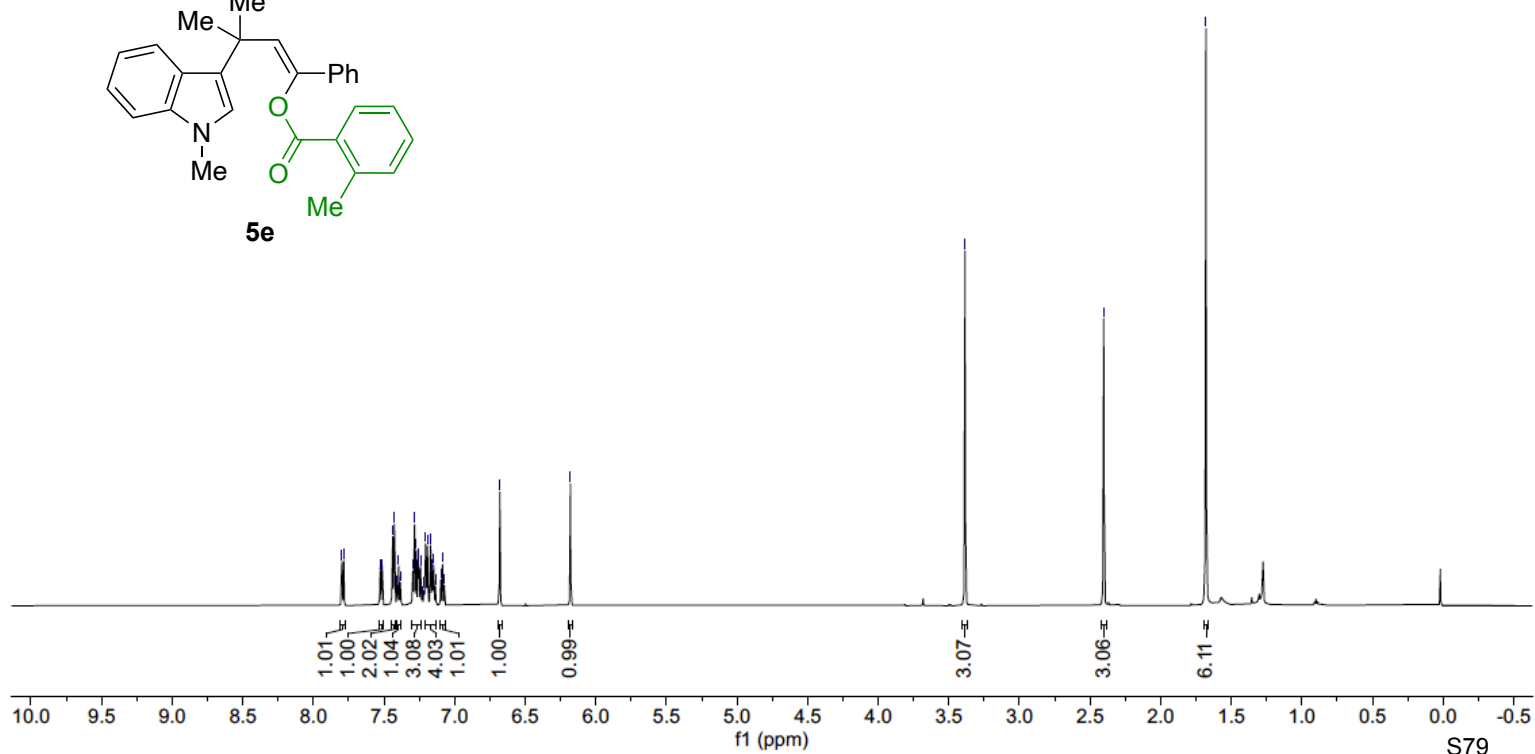

1.01  
1.00  
2.02  
1.04  
3.08  
4.03  
1.01

1.00

0.99

3.07

3.06

6.11

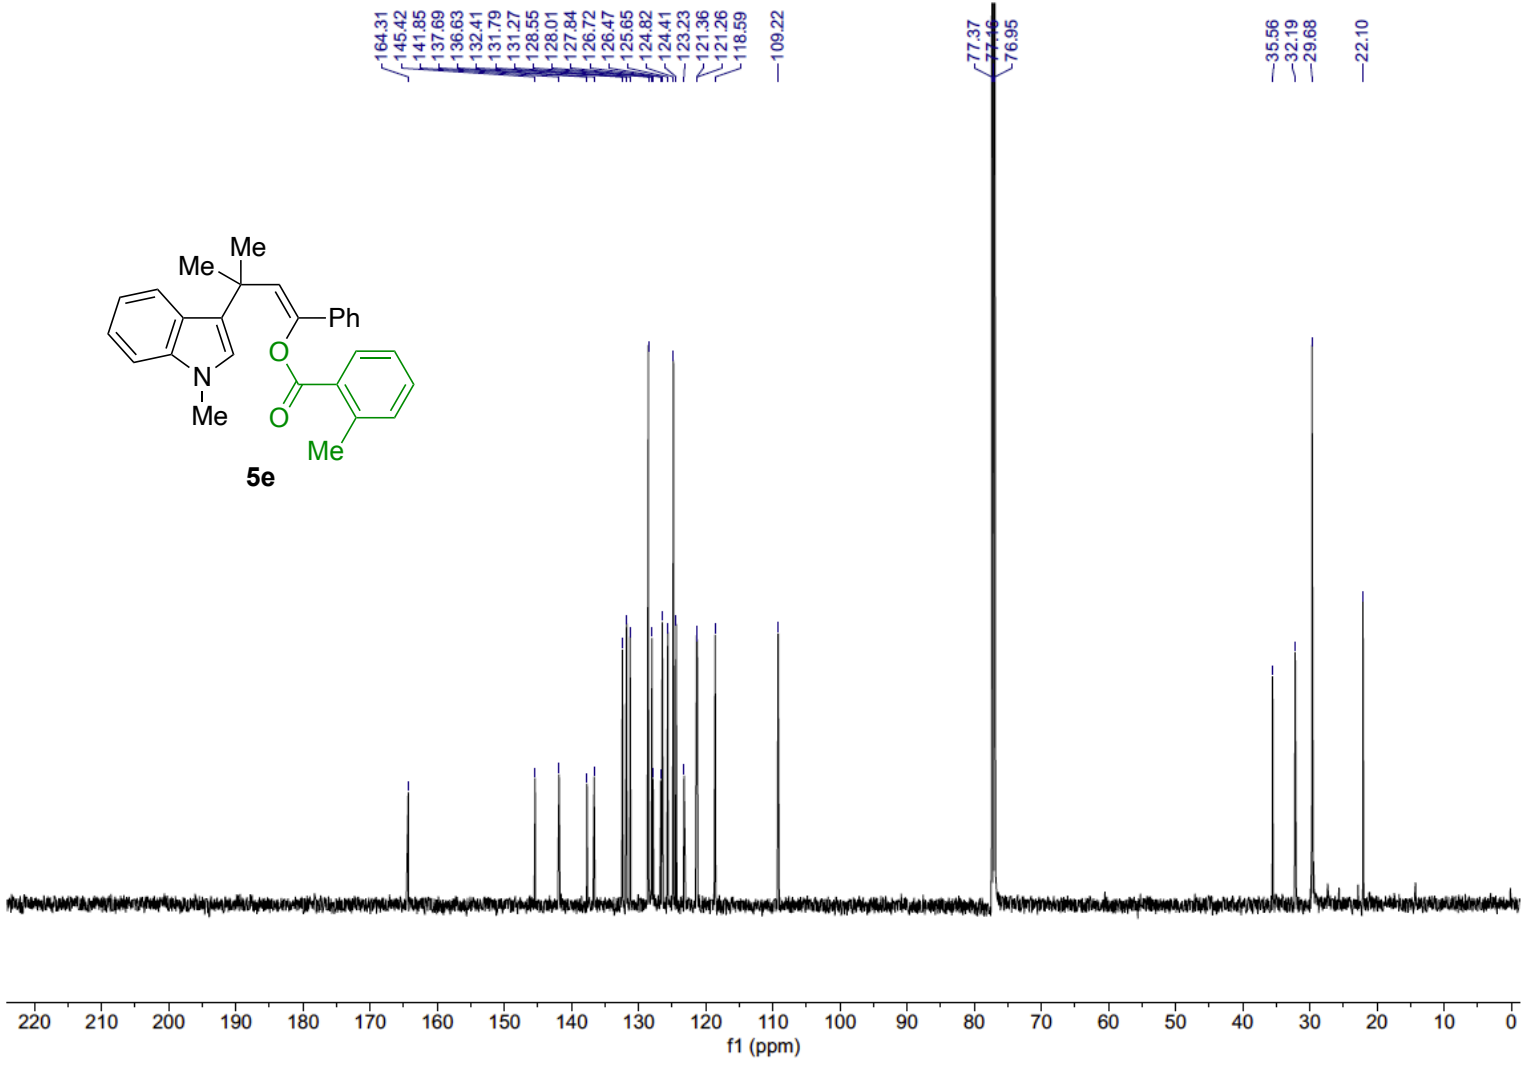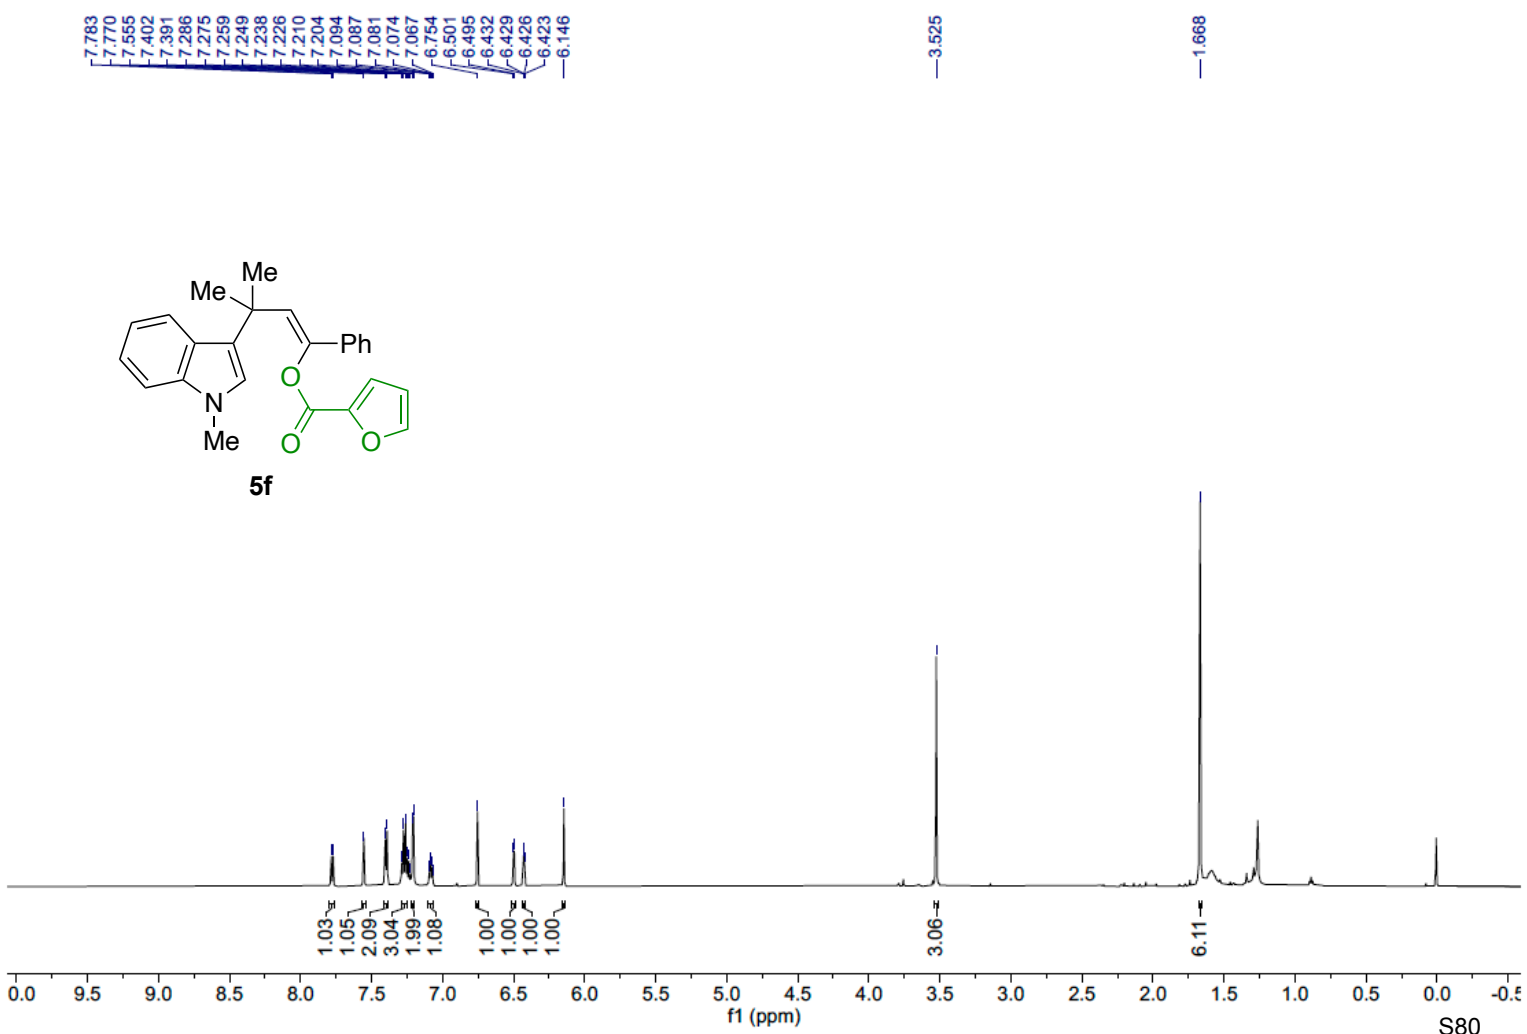



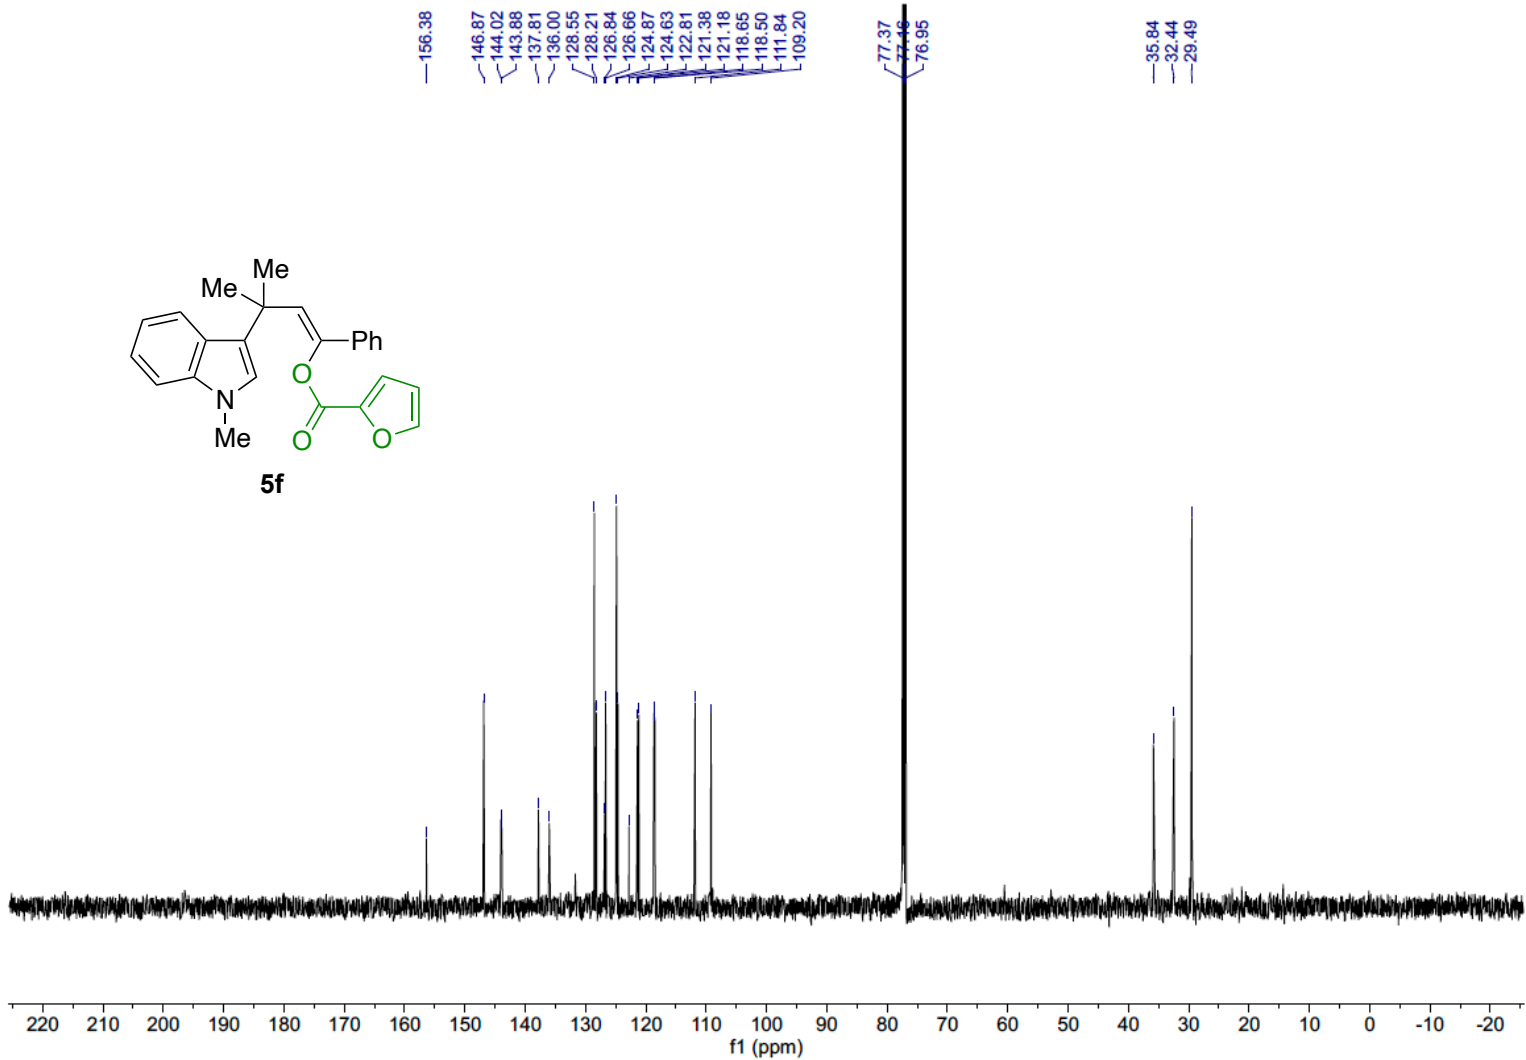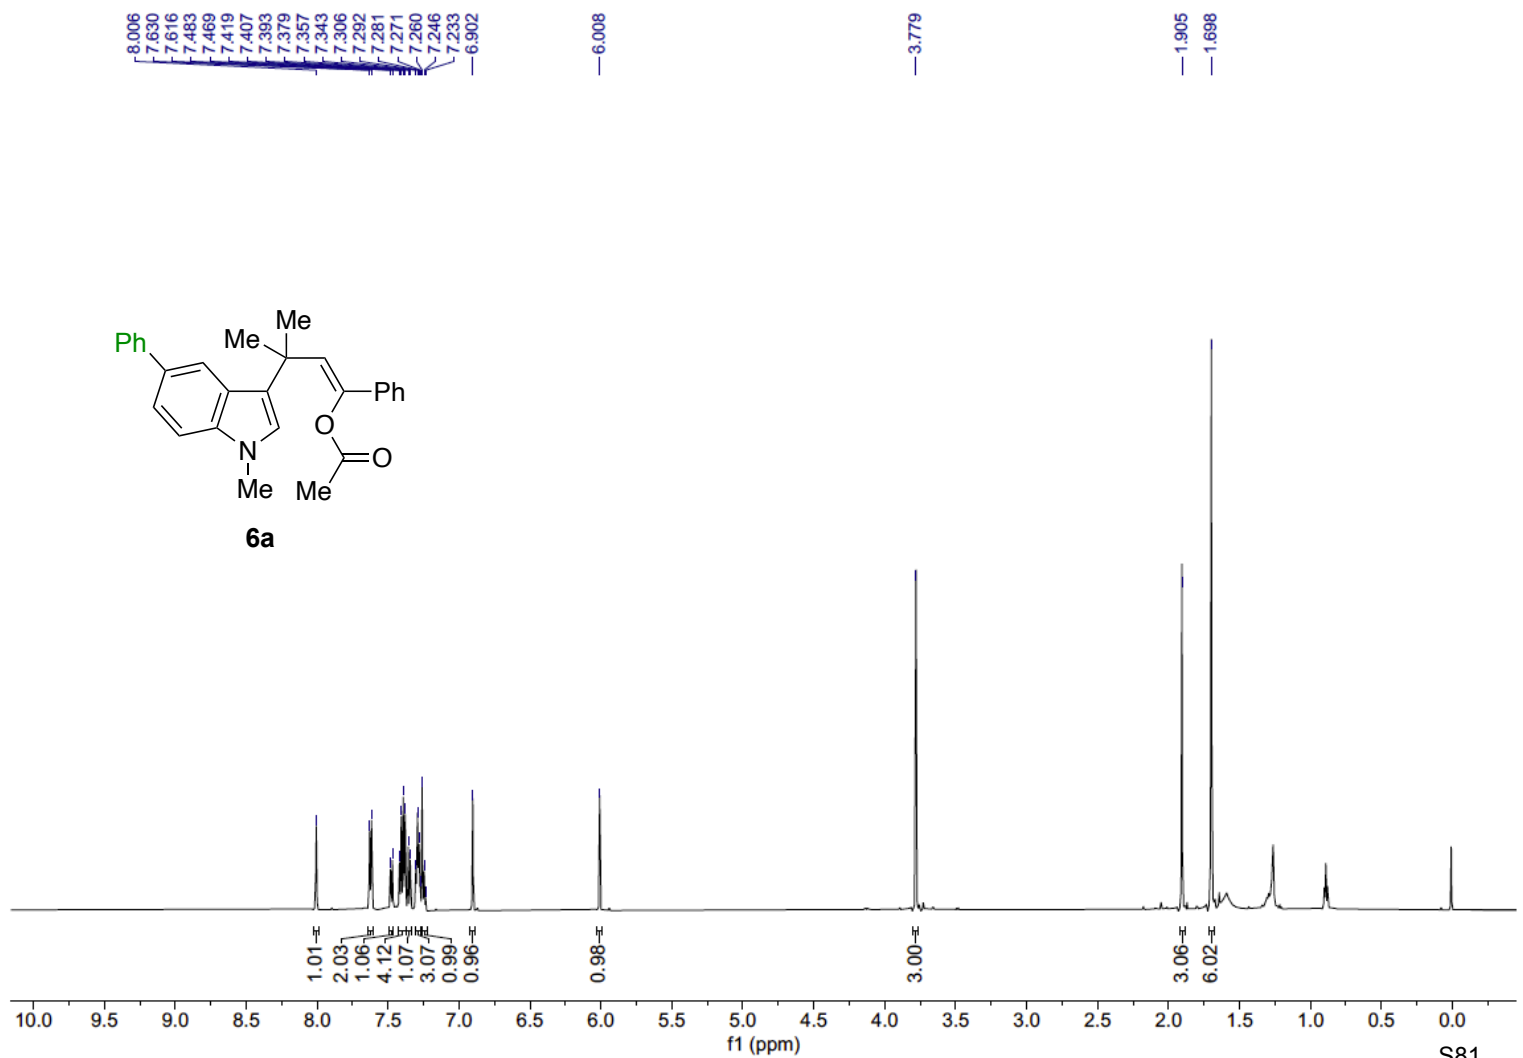

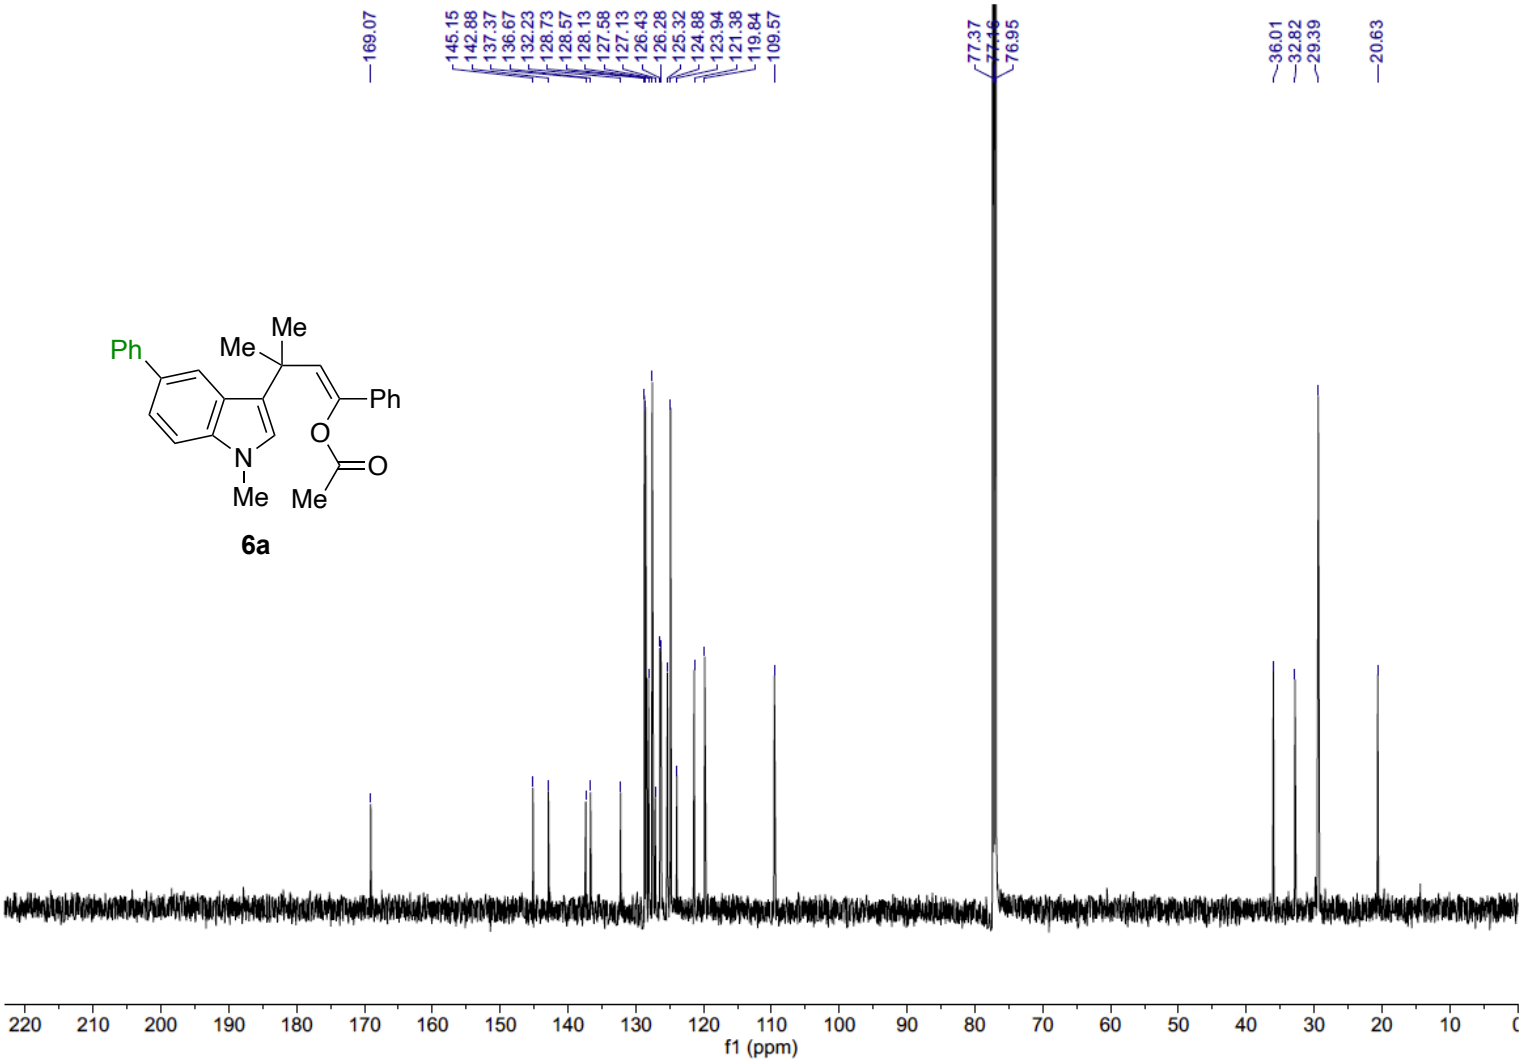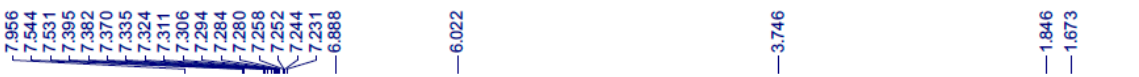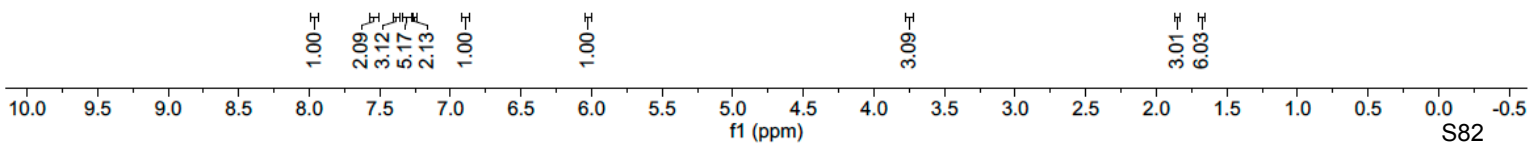

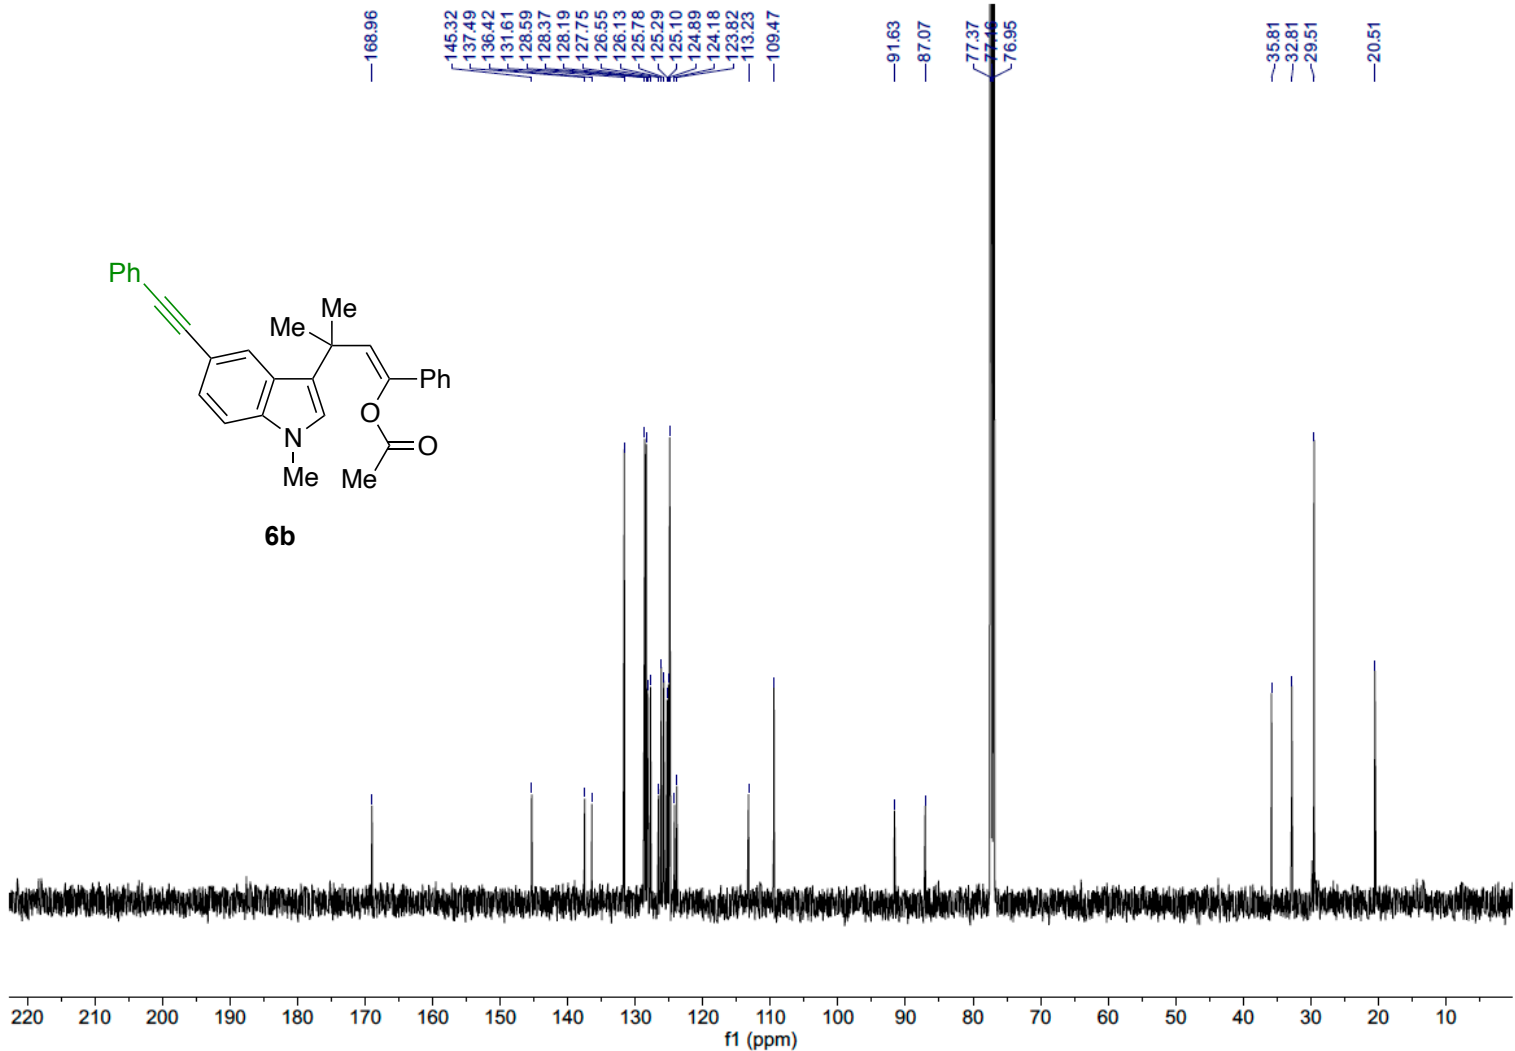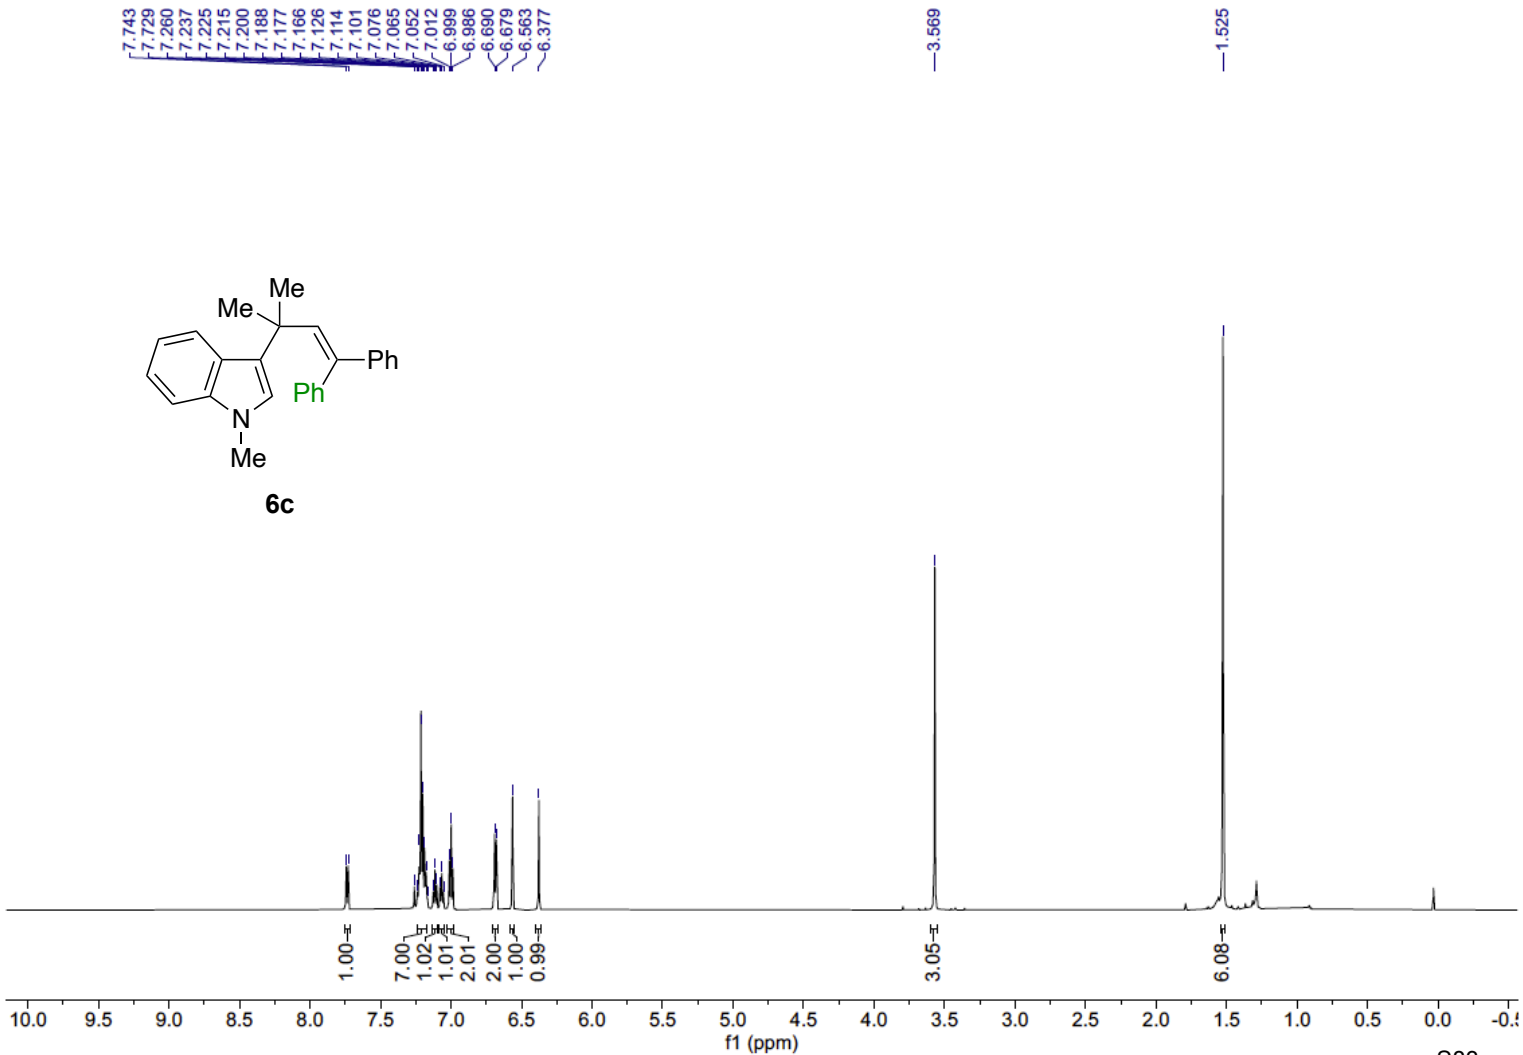

143.98  
140.69  
140.12  
139.11  
137.73  
129.75  
128.10  
127.06  
126.90  
126.77  
126.75  
125.95  
124.89  
124.20  
121.44  
121.11  
118.36  
109.13

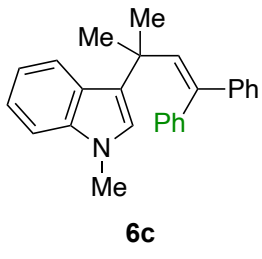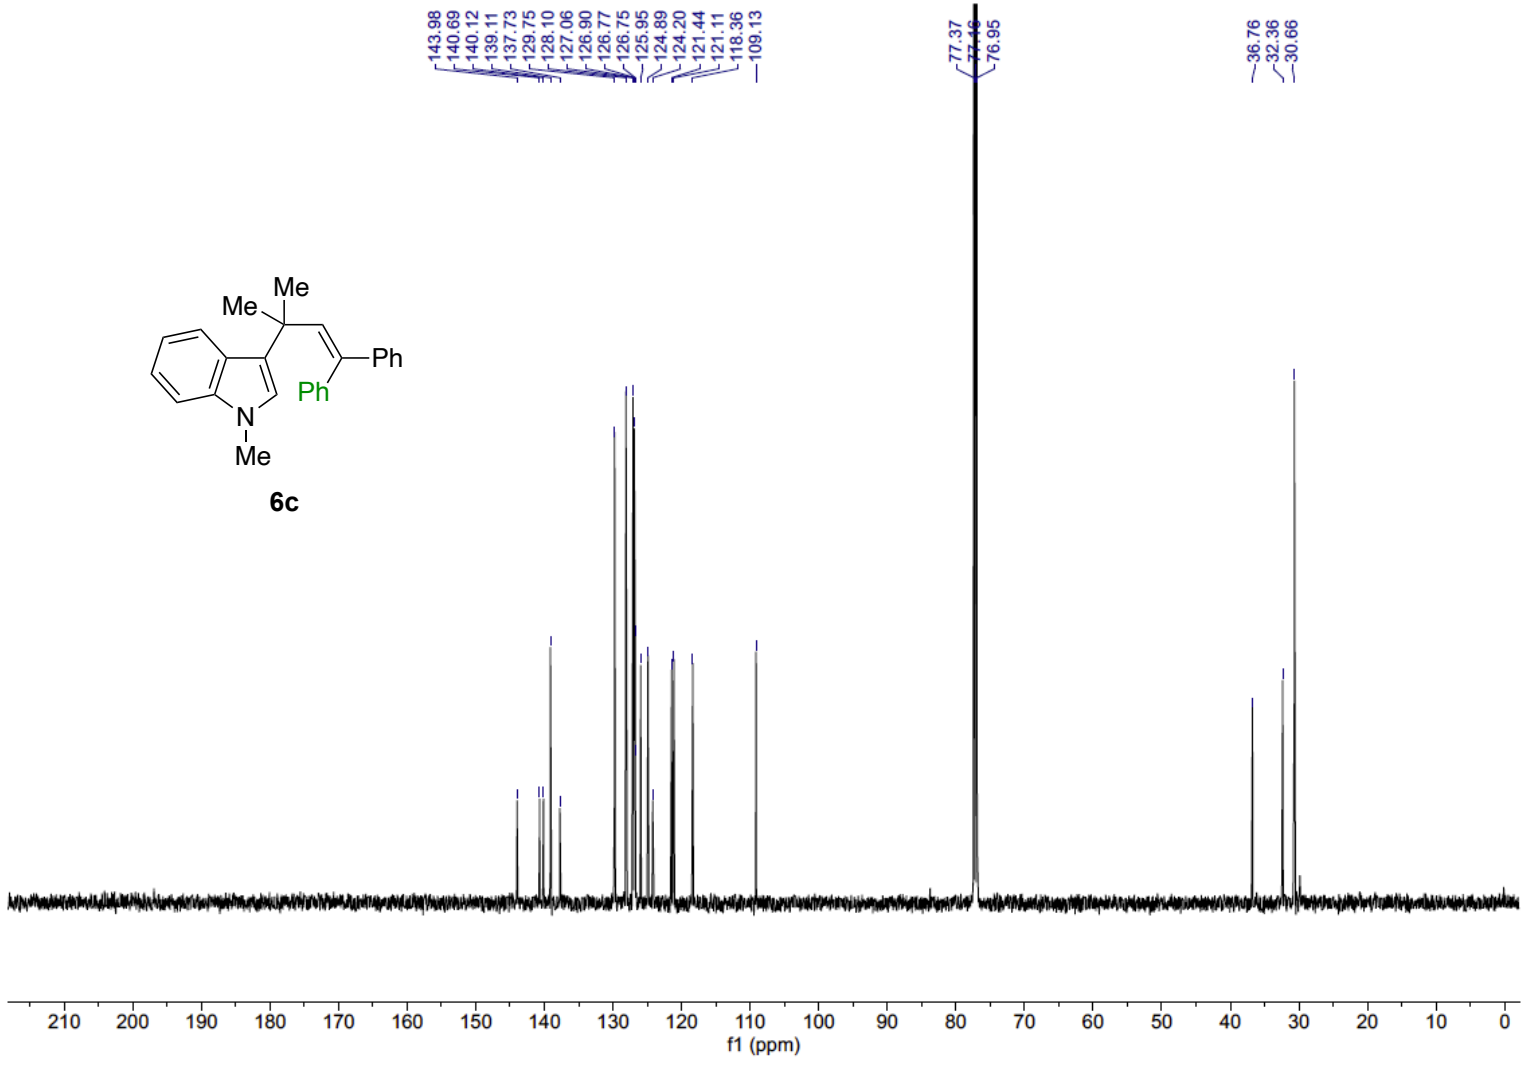

7.837  
7.824  
7.770  
7.759  
7.447  
7.435  
7.423  
7.305  
7.292  
7.279  
7.268  
7.260  
7.255  
7.216  
7.202  
7.190  
7.117  
7.104  
7.093  
6.764

3.677  
3.463  
1.608

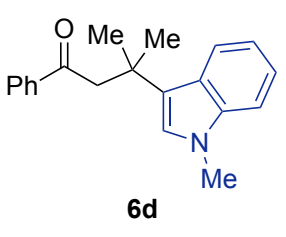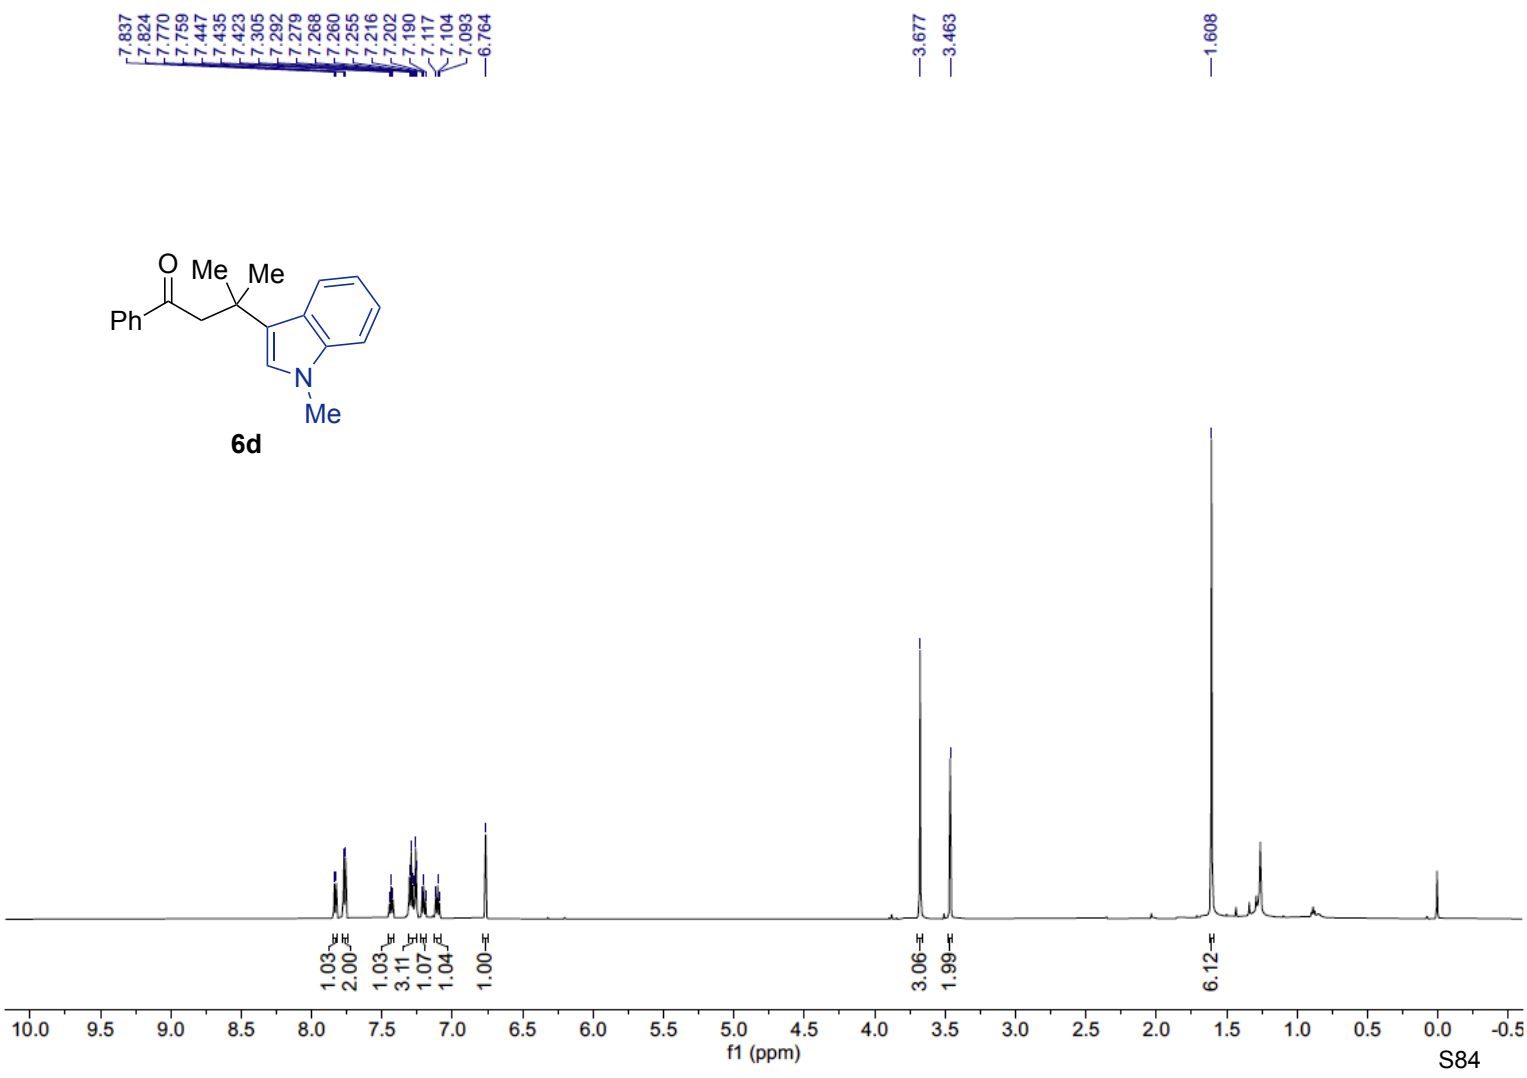

1.03  
2.00  
1.03  
3.11  
1.07  
1.04  
1.00  
3.06  
1.99  
6.12

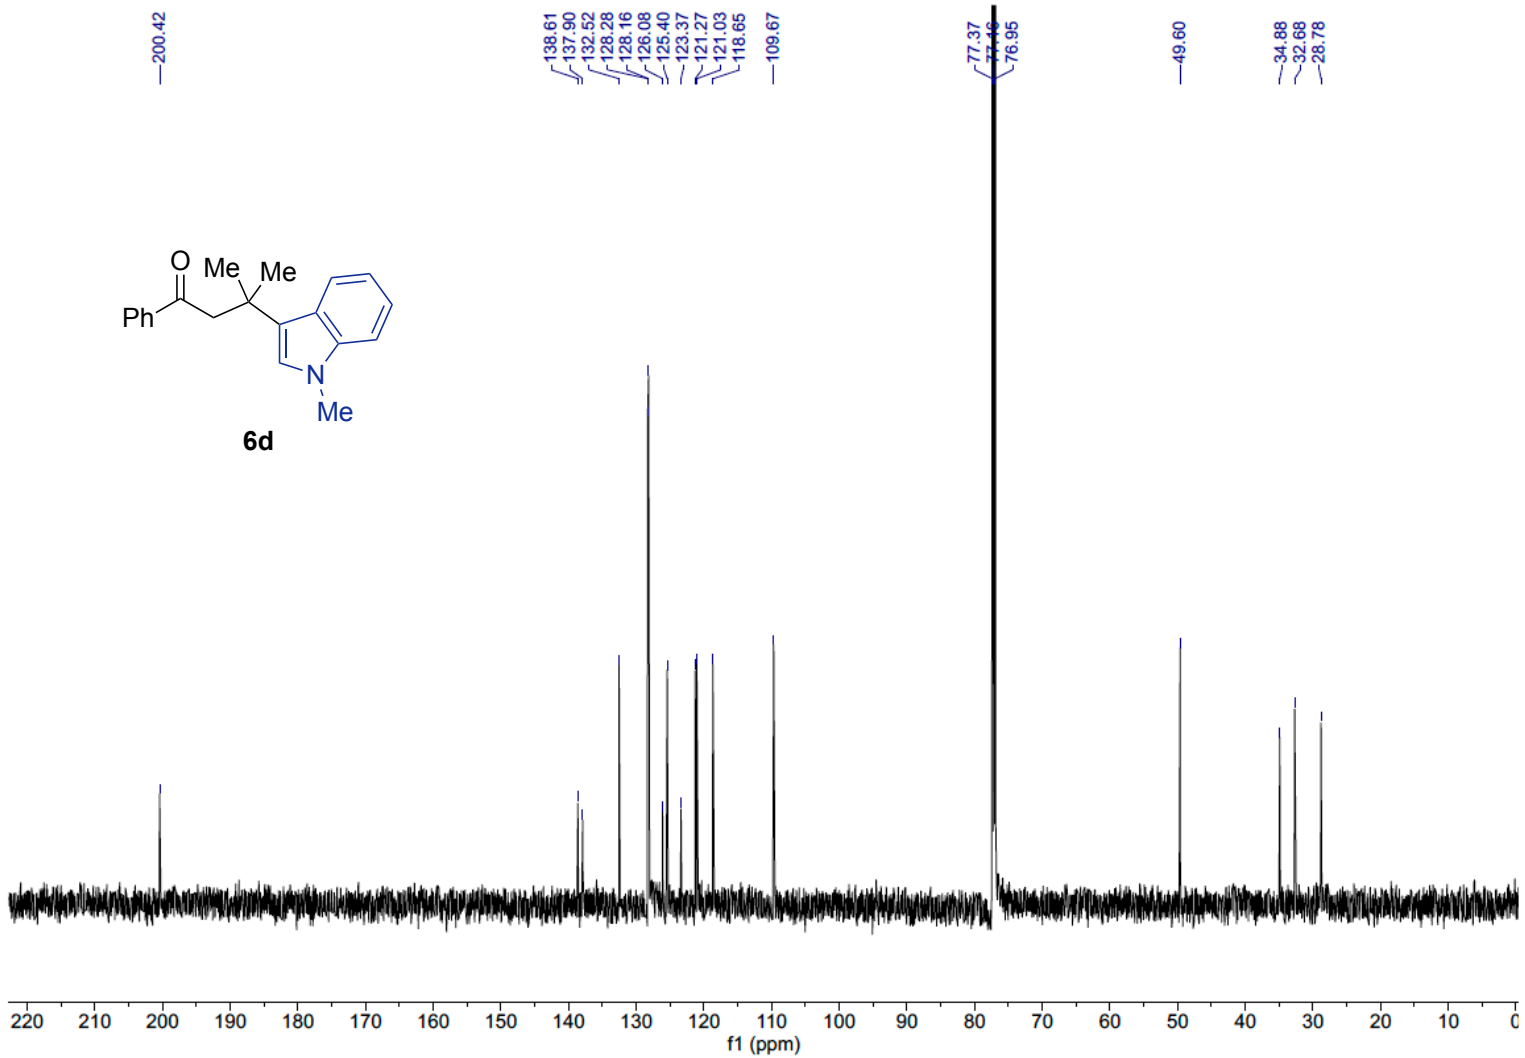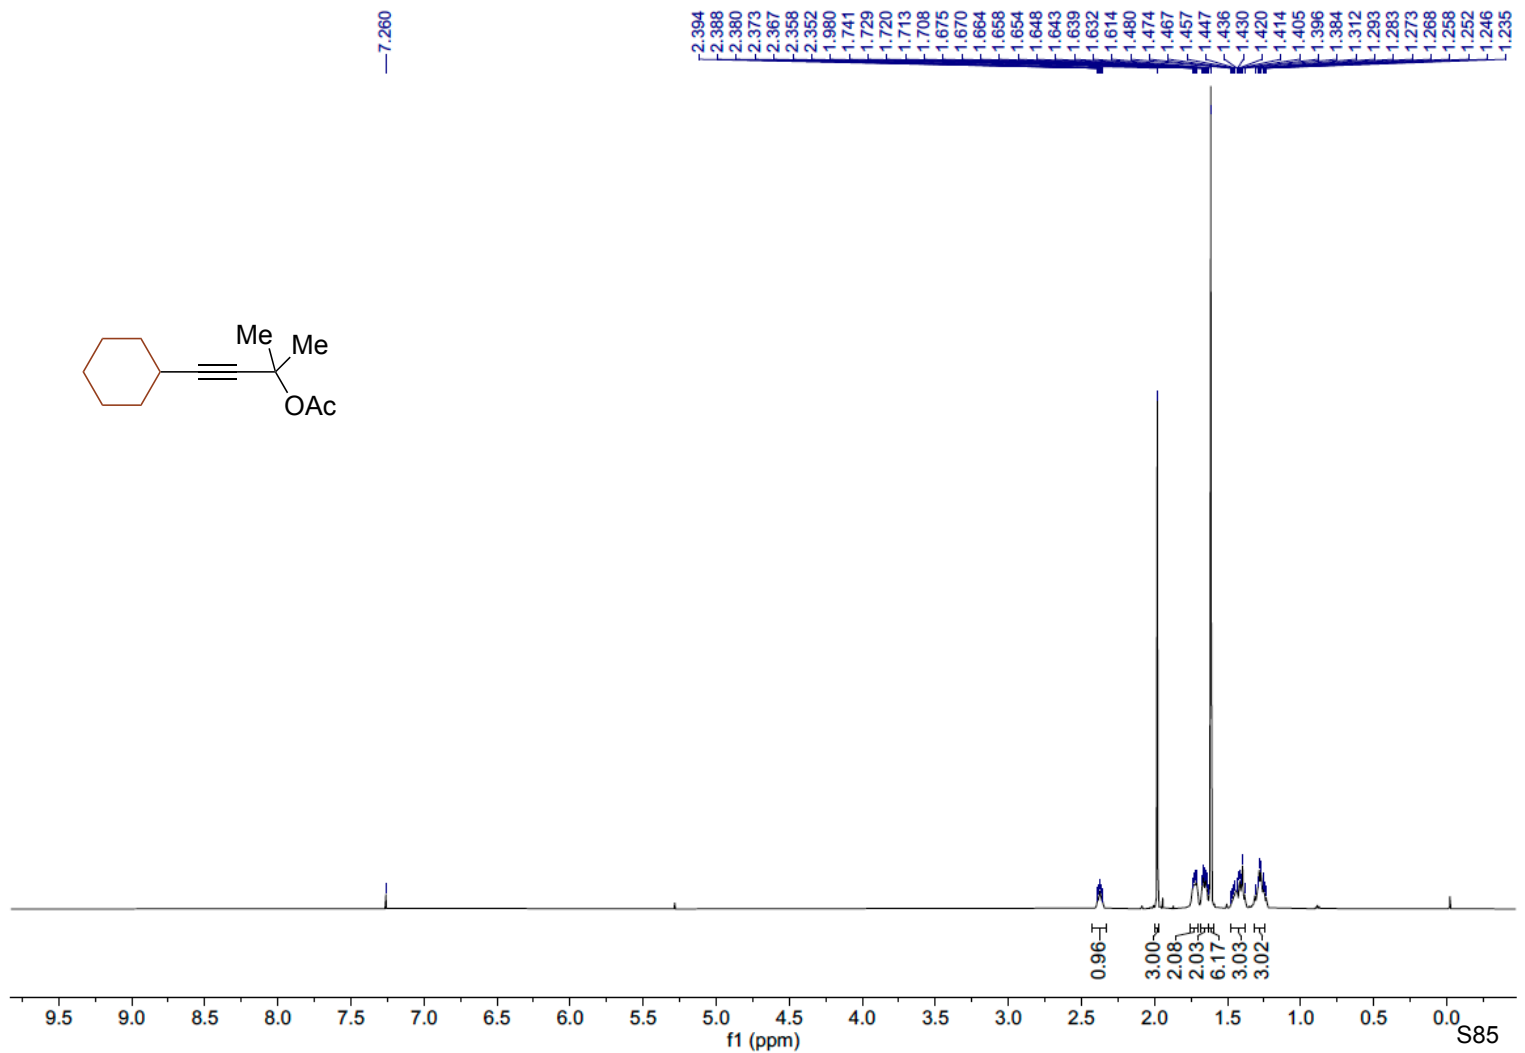

169.47

88.69

81.63

77.37

77.16

76.95

72.78

32.59

29.50

28.94

26.04

24.77

22.27

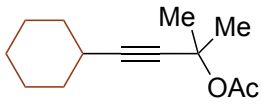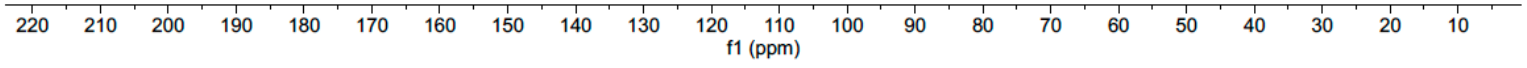

7.993  
7.978  
7.440  
7.436  
7.430  
7.423  
7.273  
7.269  
7.264  
7.249  
6.908  
6.893

3.848

1.876

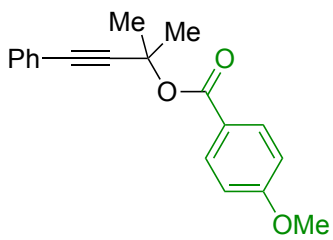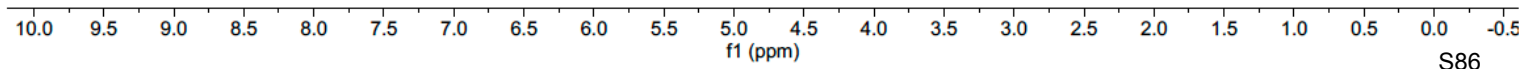

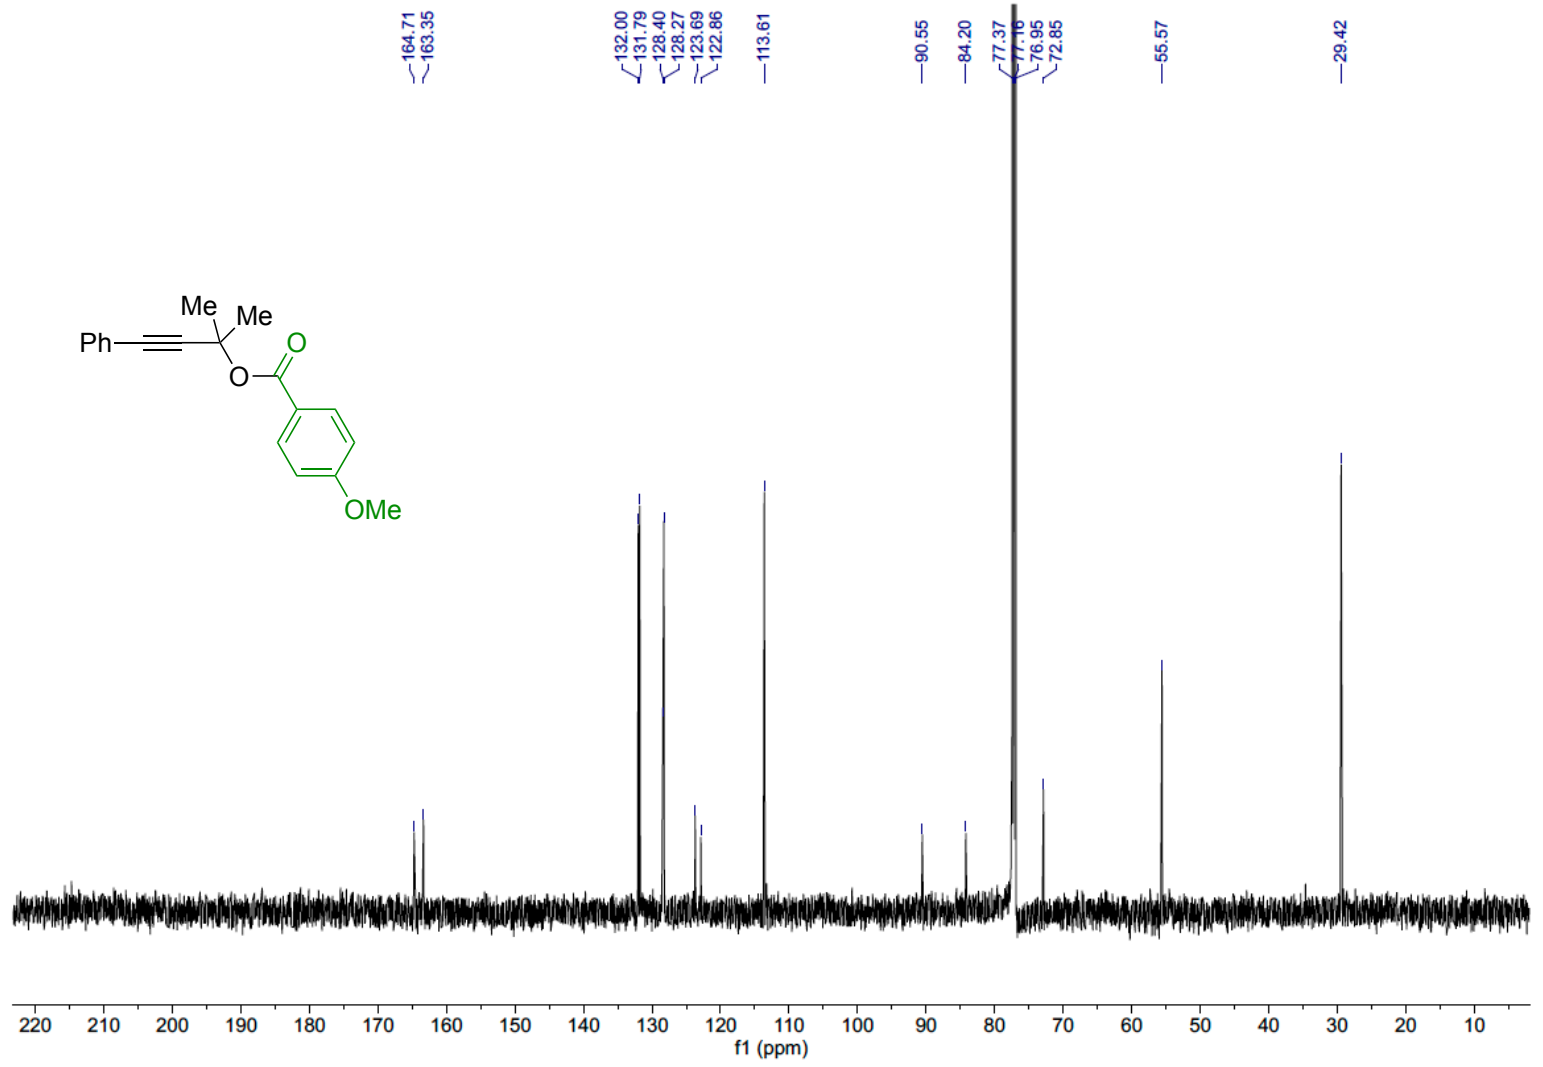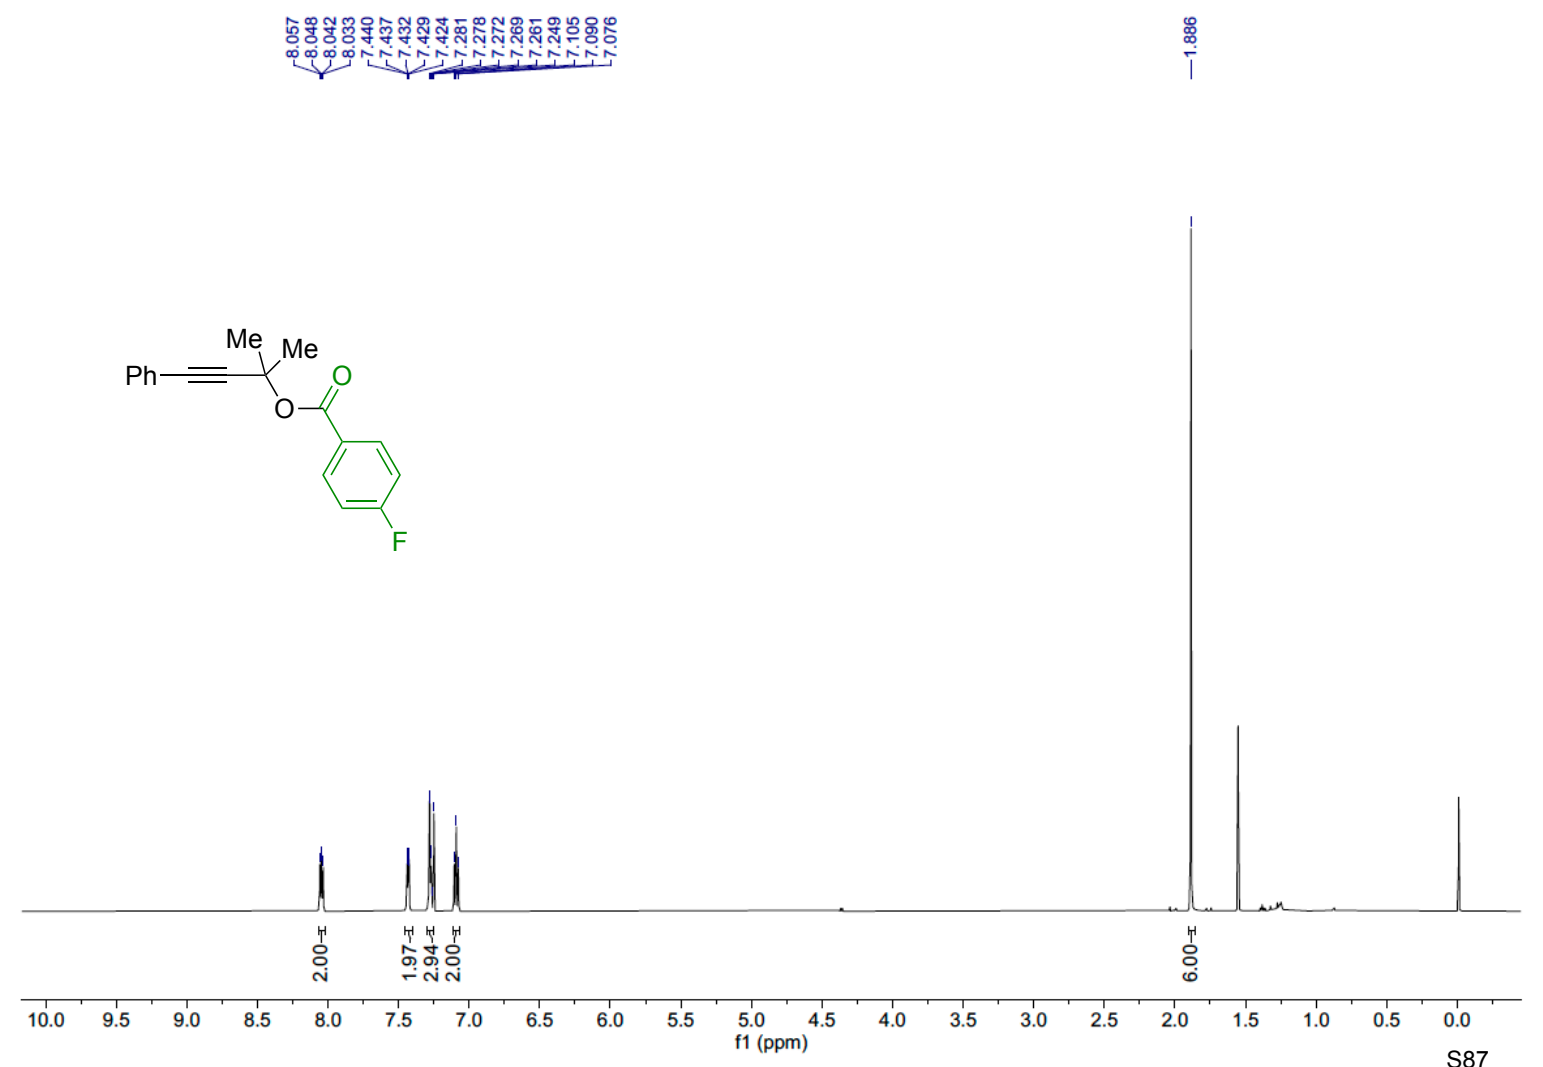

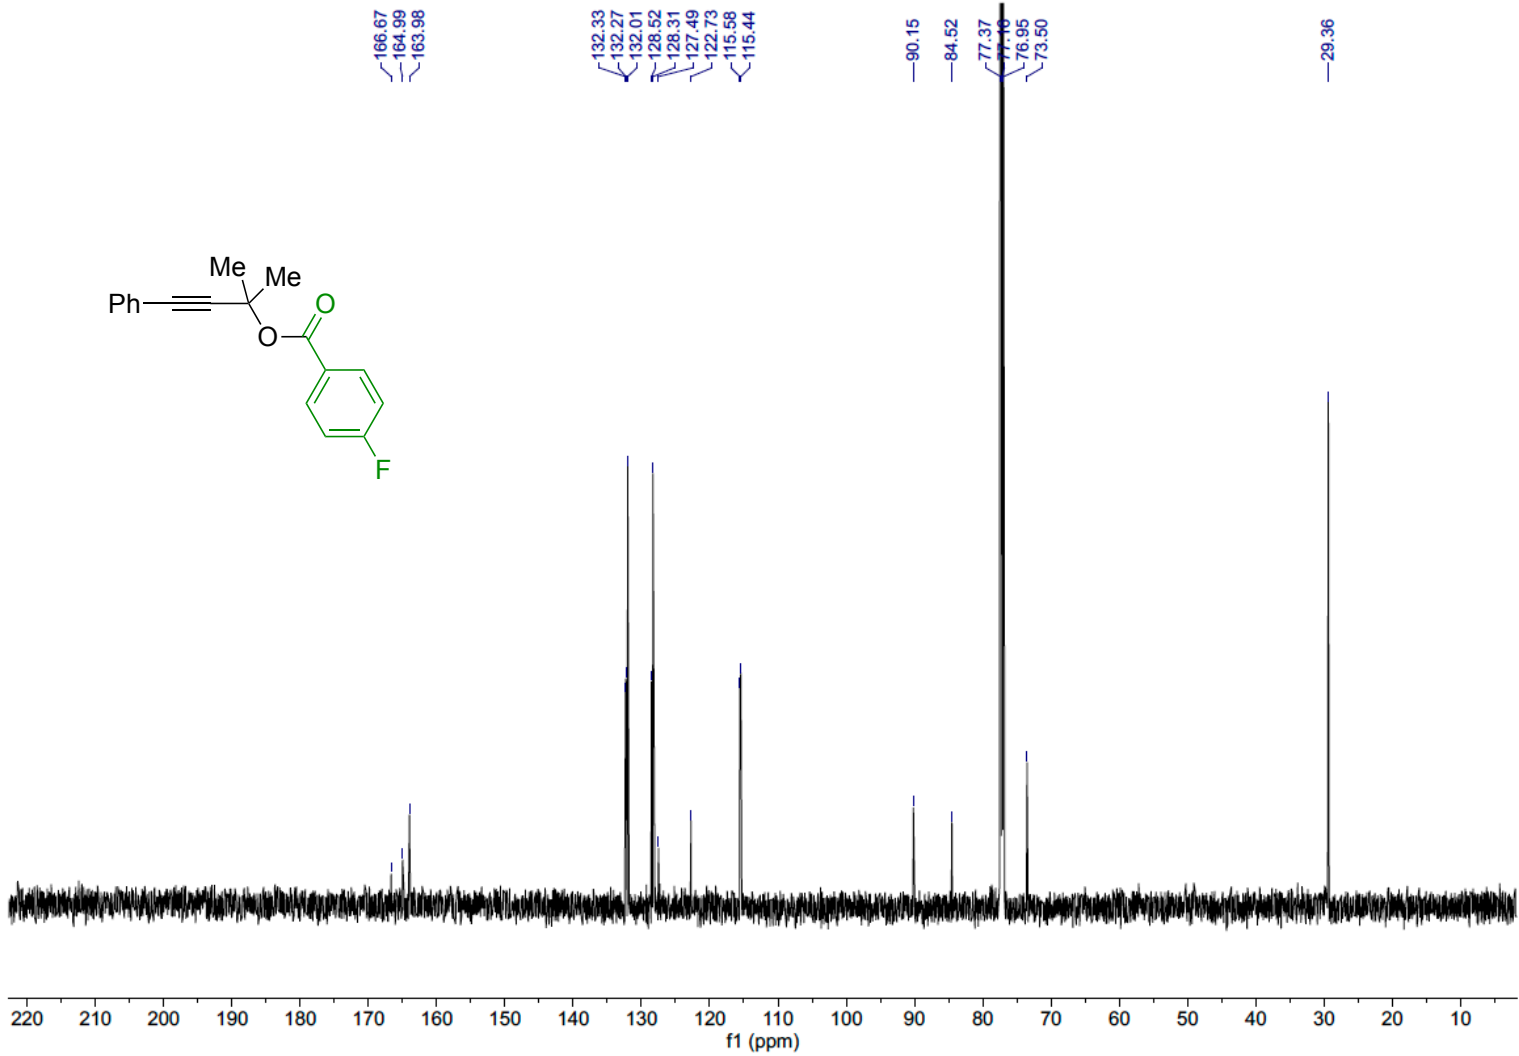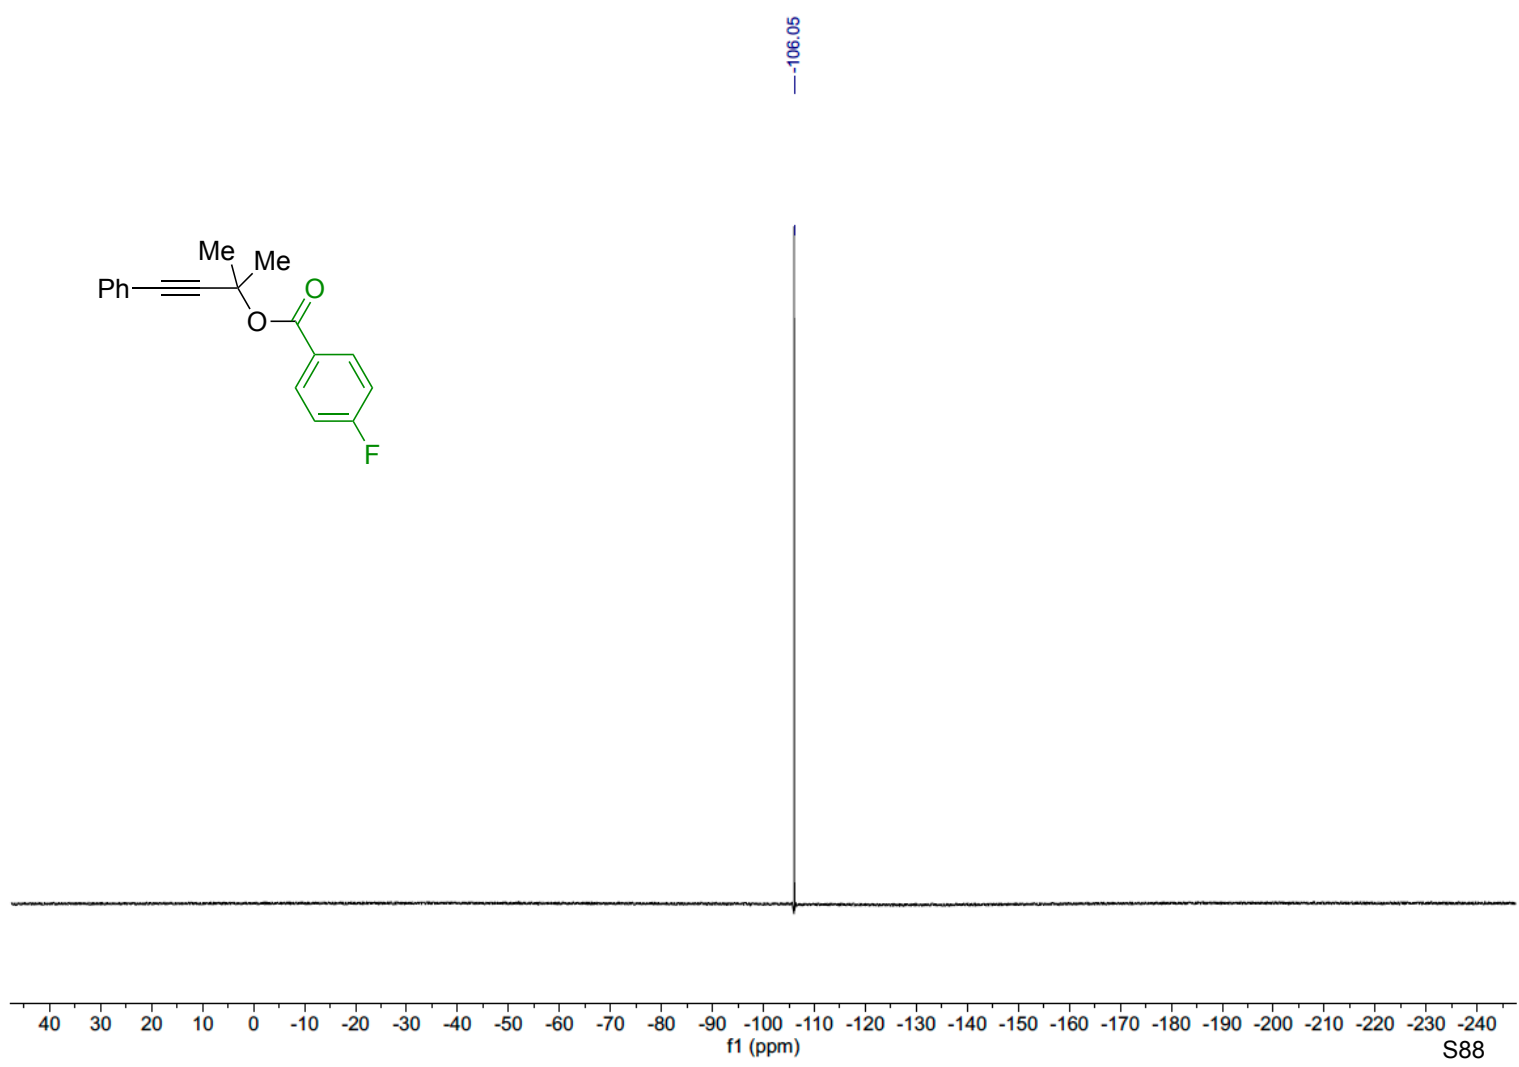



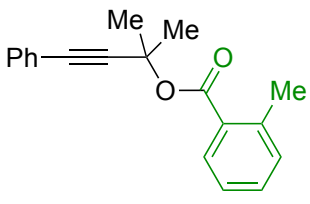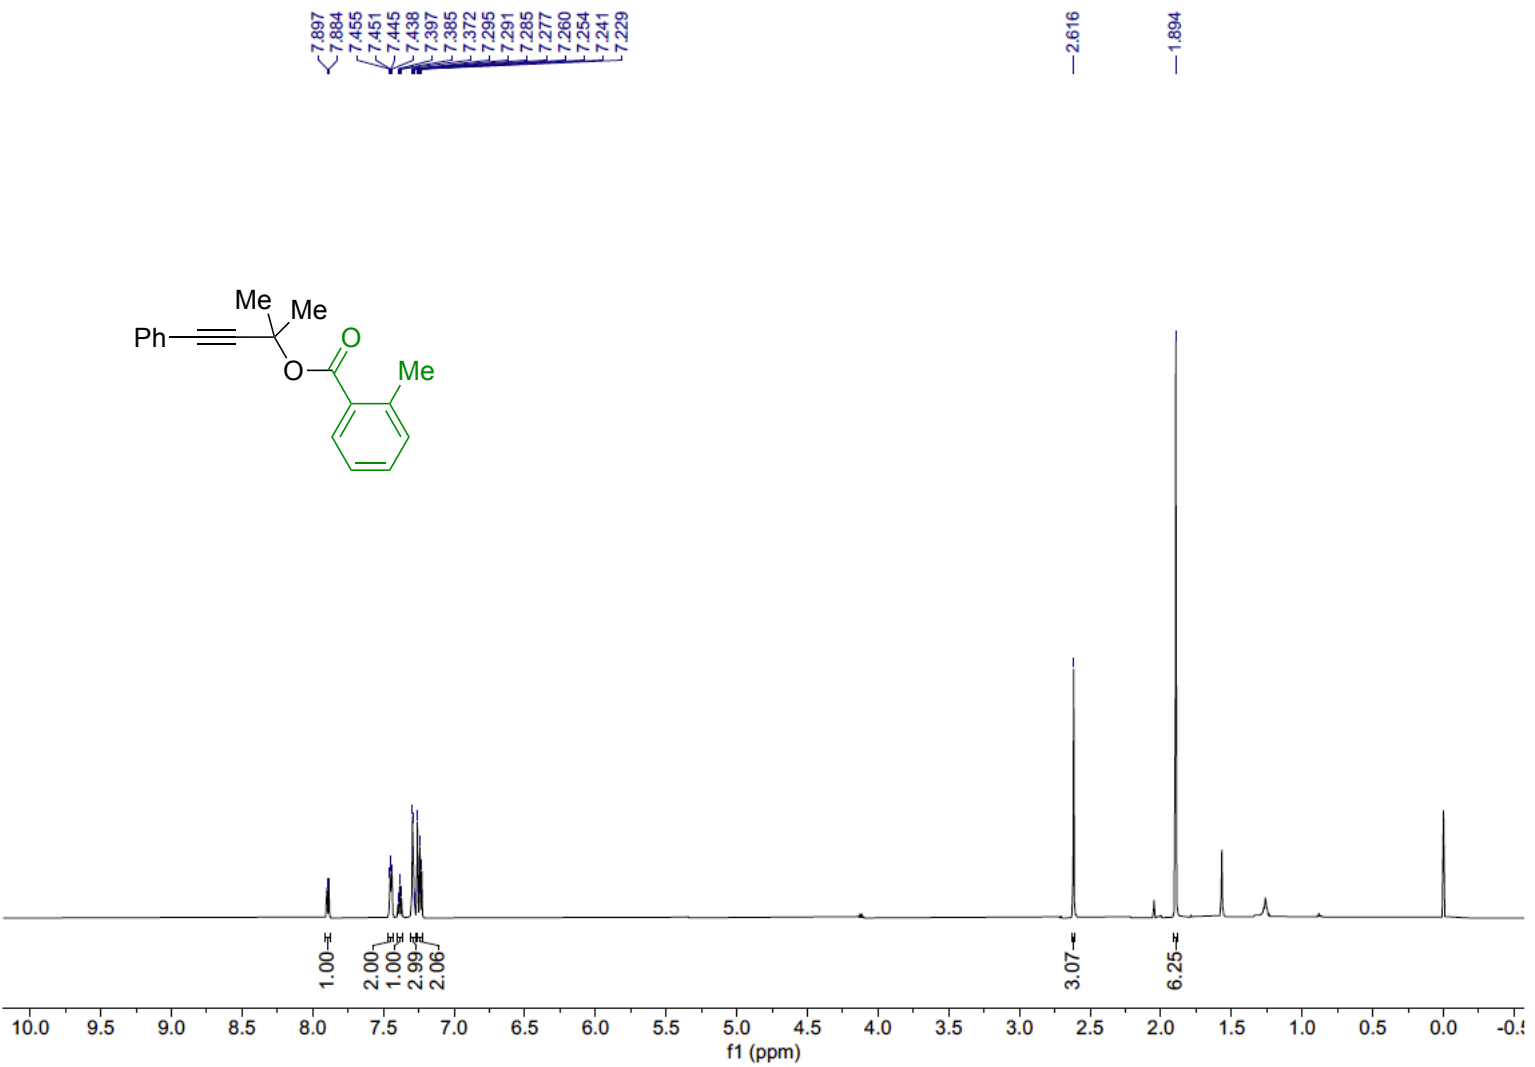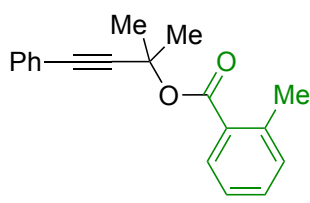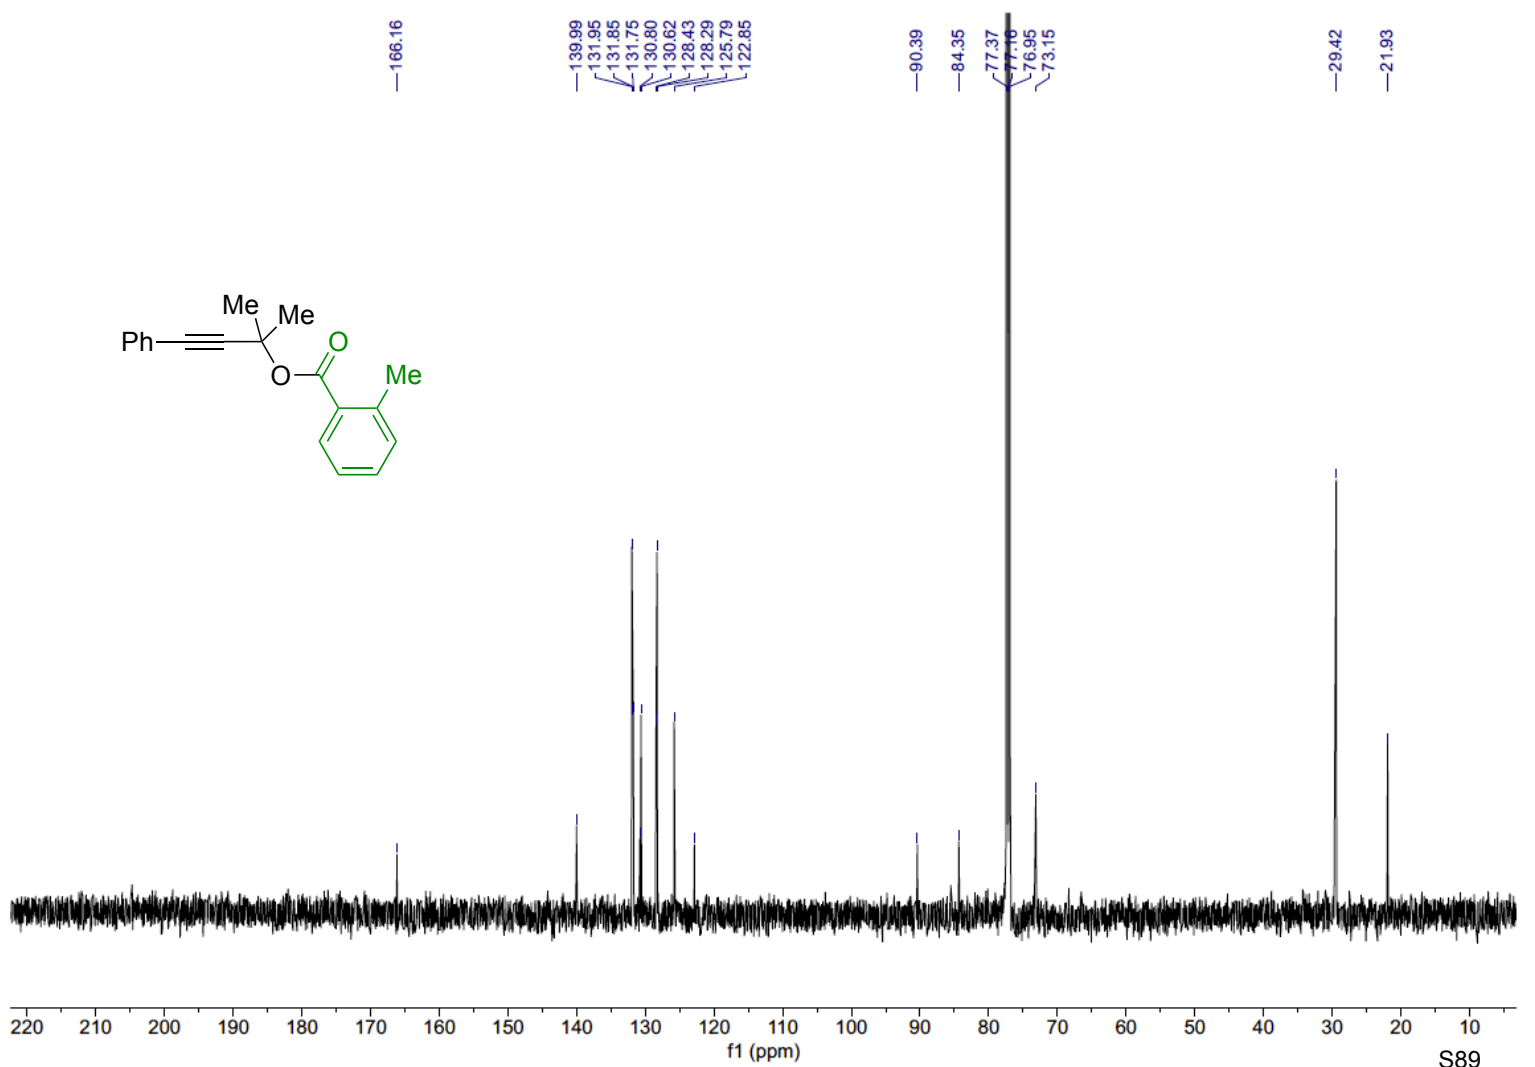

7.557  
7.555  
7.554  
7.552  
7.440  
7.437  
7.432  
7.429  
7.424  
7.279  
7.276  
7.267  
7.262  
7.249  
7.148  
7.144  
6.487  
6.484  
6.482  
6.479

1.874

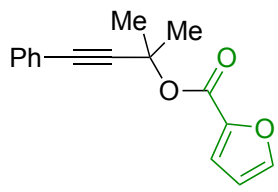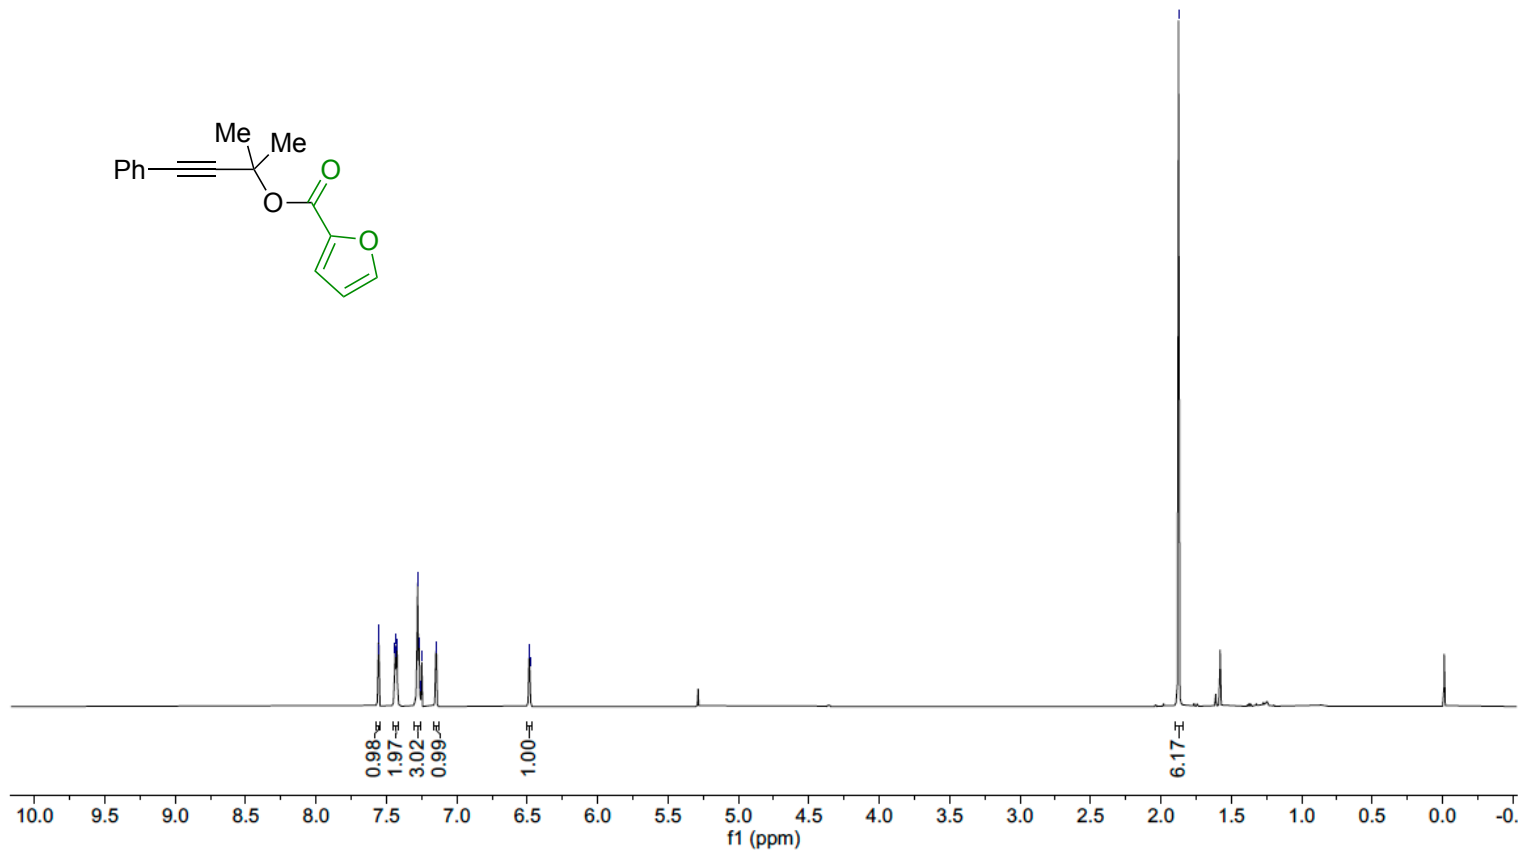

157.20

146.23  
145.33

132.00

128.53  
128.28

122.66  
117.85

111.87

89.85

84.73

77.37  
77.46

76.95  
73.90

29.40

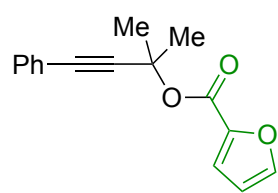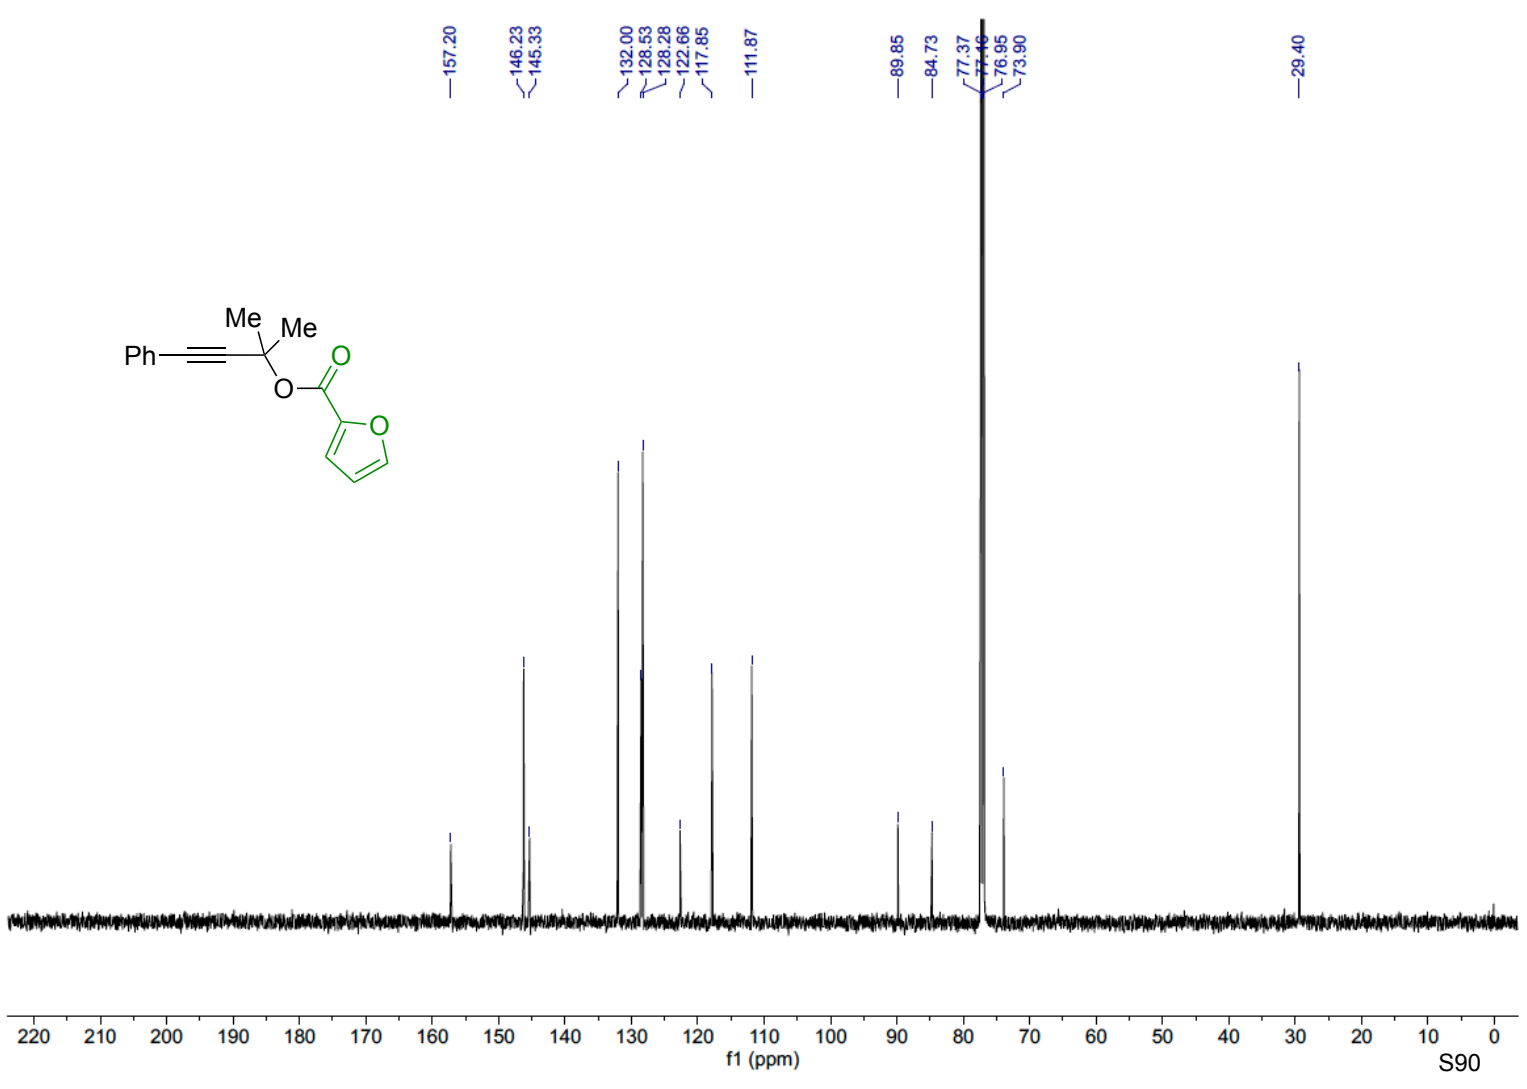

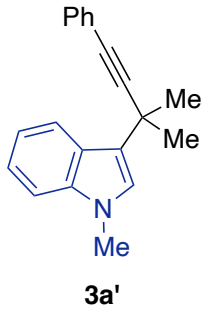

8.020  
8.007  
7.442  
7.432  
7.324  
7.310  
7.293  
7.284  
7.271  
7.260  
7.246  
7.235  
7.155  
7.144  
7.130  
7.006

3.763

1.818

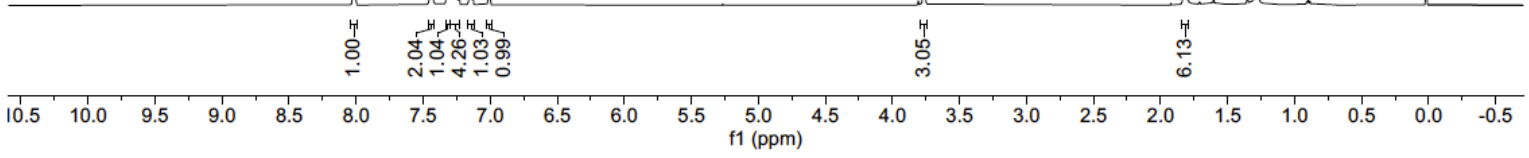

7.935  
7.933  
7.931  
7.921  
7.919  
7.584  
7.532  
7.530  
7.523  
7.520  
7.517  
7.510  
7.507  
7.505  
7.458  
7.457  
7.455  
7.447  
7.444  
7.442  
7.432  
7.431  
7.280  
6.753  
6.751  
6.749  
6.746  
6.744

2.213  
2.021

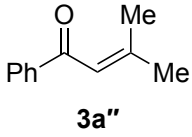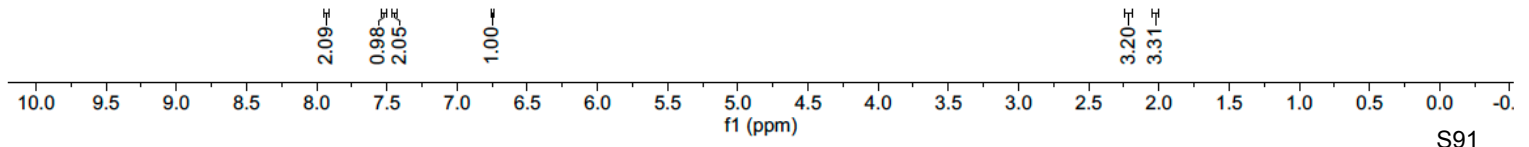

Supplement: d4qo00869c1.pdf [file d4qo00869c1.pdf]
